# Supplementary material for: Intelligent control strategy for industrial furnaces based on yield classification prediction using a gray relative correlation-convolutional neural network-multilayer perceptron (GCM) machine learning model
Source: PeerJ journal article supplement (doi:10.7717/peerj-cs.1836), 2024-02-19
Supplement: raw_dada.xlsx [file raw_dada.xlsx]

## Sheet: Sheet1
Parameter	Upper arch bridge temperature1	Upper arch bridge temperature2	Upper arch bridge temperature3	Upper arch bridge temperature4	Upper arch bridge temperature5	Upper arch bridge temperature6	Lower arch bridge temperature1	Lower arch bridge temperature2	Lower arch bridge temperature3	Lower arch bridge temperature4	Lower arch bridge temperature5	Lower arch bridge temperature6	Circulating gas temperature1	Circulating gas temperature2	Circulating gas temperature3	Circulating gas temperature4	Circulating gas temperature5	Circulating gas temperature6	Lower combustor temperature1	Lower combustor temperature2	Lower combustor temperature3	Lower combustor temperature4	Lower combustor temperature5	Lower combustor temperature6	Outlet temperatures of heat exchanger exhaust gas	Inlet temperatures of heat exchanger exhaust gas	Ring pipe temperature of cooling air	Mixing temperature of exhaust gas	Exhaust gas temperature at kiln top	Average temperature of ash discharge	Gas flow rate of upper combustor	Gas flow rate of lower combustor	Upper cold flow rate	Lower cold flow rate	Air flow rate for cooling lime	Gas flow	Driving fan flow	Yield	Bottom temperature of upper inner cylinder1	Bottom temperature of upper inner cylinder2	Bottom temperature of upper inner cylinder3	Dust removal fan pressure	Differential pressure for Dust removal fan	High temperature exhaust gas fan current	High temperature exhaust fan frequency	Negative pressure of lower combustor	Driving fan pressure	Driving fan frequency	Drive air loop temperature
Abbreviations in paper	TUAB1	TUAB2	TUAB3	TUAB4	TUAB5	TUAB6	TLAB1	TLAB2	TLAB3	TLAB4	TLAB5	TLAB6	TCG1	TCG2	TCG3	TCG4	TCG5	TCG6	TLCC1	TLCC2	TLCC3	TLCC4	TLCC5	TLCC6	TEXGHE	TENGHE	TCAL	TEGM	TEGKT	TEC	FUCCG	FLCCG	FCU	FCL	FLCA	FG	FDF	output
1	0.787313	0.686441	0.743191	0.814815	0.719298	0.767507	0.755459	0.7277	0.679104	0.683128	0.803109	0.6639	0.692308	0.721357	0.578656	0.532618	0.662277	0.643492	0.701094	0.738514	0.580402	0.688571	0.753201	0.766129	0.73922	0.899123	0.634615	0.575419	0.613281	0.472222	0.82343	0.637437	0.732836	0.864469	0.757712	1	0.828661	0.719268	0.337636	0.713178	0.150298	0.45933	0.356701	0.698163	0.34375	0.492723	0.87037	0.893617	0.849741
2	0.787313	0.683616	0.743191	0.814815	0.719298	0.764706	0.755459	0.7277	0.675373	0.683128	0.803109	0.6639	0.702381	0.725023	0.58419	0.535921	0.658514	0.641876	0.704739	0.743919	0.58392	0.756429	0.751067	0.767473	0.73922	0.900585	0.610577	0.575419	0.617188	0.541667	0.830221	0.629848	0.734826	0.864708	0.752902	1	0.837537	0.719268	0.341016	0.713178	0.150298	0.447368	0.379381	0.706037	0.34375	0.390852	0.87037	0.87234	0.849741
3	0.783582	0.680791	0.7393	0.811111	0.715789	0.764706	0.751092	0.723005	0.675373	0.683128	0.803109	0.659751	0.706044	0.725023	0.58419	0.537572	0.671684	0.642684	0.699271	0.743919	0.574372	0.752857	0.750356	0.765457	0.73306	0.896199	0.596154	0.578212	0.613281	0.53125	0.803056	0.591062	0.730597	0.865663	0.753589	1	0.836346	0.719268	0.337636	0.713178	0.150298	0.454545	0.358763	0.703412	0.34375	0.446985	0.87037	0.87234	0.849741
4	0.783582	0.680791	0.7393	0.811111	0.712281	0.764706	0.751092	0.723005	0.675373	0.679012	0.803109	0.659751	0.70696	0.72594	0.58498	0.541701	0.69238	0.645918	0.701701	0.747973	0.567839	0.75	0.743243	0.768817	0.728953	0.899123	0.581731	0.581006	0.609375	0.517361	0.685908	0.583474	0.737065	0.864708	0.74748	1	0.834722	0.719268	0.334257	0.705426	0.147321	0.416268	0.373196	0.700787	0.34375	0.50104	0.87037	0.87234	0.849741
5	0.783582	0.680791	0.7393	0.811111	0.712281	0.761905	0.751092	0.723005	0.675373	0.679012	0.803109	0.655602	0.706044	0.729606	0.596838	0.542527	0.681091	0.648343	0.692588	0.74527	0.573869	0.744286	0.732575	0.765457	0.724846	0.896199	0.625	0.564246	0.613281	0.451389	0.682513	0.589376	0.735572	0.865902	0.754734	1	0.833965	0.719268	0.334257	0.705426	0.147321	0.401914	0.358763	0.687664	0.34375	0.484407	0.87037	0.87234	0.84456
6	0.783582	0.680791	0.7393	0.811111	0.712281	0.761905	0.751092	0.723005	0.671642	0.679012	0.803109	0.655602	0.706044	0.729606	0.592885	0.540875	0.688617	0.650768	0.695626	0.74527	0.575879	0.745714	0.733997	0.764785	0.724846	0.896199	0.625	0.564246	0.613281	0.524306	0.687606	0.602867	0.735572	0.865265	0.760003	1	0.838944	0.719268	0.334257	0.705426	0.14881	0.440191	0.36701	0.692913	0.34375	0.50104	0.888889	0.87234	0.84456
7	0.783582	0.680791	0.7393	0.811111	0.810526	0.761905	0.751092	0.723005	0.671642	0.679012	0.803109	0.655602	0.707875	0.727773	0.592095	0.540875	0.685795	0.648343	0.695626	0.747297	0.577387	0.745714	0.758179	0.765457	0.724846	0.894737	0.552885	0.586592	0.632812	0.434028	0.804754	0.70742	0.732836	0.866778	0.765195	1	0.839377	0.719268	0.344395	0.72093	0.150298	0.42823	0.371134	0.700787	0.34375	0.513514	0.87037	0.87234	0.841969
8	0.783582	0.677966	0.7393	0.811111	0.708772	0.761905	0.751092	0.723005	0.671642	0.679012	0.803109	0.655602	0.703297	0.72594	0.588142	0.538398	0.694262	0.648343	0.694411	0.745946	0.573869	0.742143	0.756757	0.764113	0.724846	0.896199	0.543269	0.597765	0.660156	0.5	0.696095	0.711636	0.728607	0.863911	0.773595	1	0.843273	0.719268	0.344395	0.736434	0.153274	0.464115	0.410309	0.690289	0.34375	0.530146	0.87037	0.914894	0.841969
9	0.787313	0.683616	0.743191	0.814815	0.708772	0.761905	0.759825	0.732394	0.679104	0.683128	0.80829	0.6639	0.702381	0.72319	0.589723	0.537572	0.684854	0.644301	0.691981	0.74527	0.571859	0.740714	0.749644	0.752016	0.728953	0.902047	0.543269	0.592179	0.628906	0.472222	0.787776	0.706577	0.729104	0.862478	0.743433	1	0.853339	0.719268	0.347775	0.736434	0.15625	0.416268	0.36701	0.690289	0.34375	0.507277	0.87037	0.914894	0.84456
10	0.794776	0.686441	0.747082	0.818519	0.715789	0.764706	0.768559	0.737089	0.682836	0.691358	0.818653	0.66805	0.696886	0.722273	0.594466	0.537572	0.656632	0.643492	0.716282	0.736486	0.567839	0.73	0.732575	0.750672	0.728953	0.900585	0.629808	0.597765	0.652344	0.53125	0.655348	0.706577	0.717164	0.857063	0.768097	1	0.863405	0.719268	0.354533	0.75969	0.159226	0.363636	0.369072	0.682415	0.34375	0.52183	0.87037	0.93617	0.84456
11	0.802239	0.69209	0.750973	0.822222	0.722807	0.767507	0.772926	0.746479	0.690299	0.695473	0.829016	0.676349	0.695055	0.718607	0.593676	0.534269	0.637817	0.640259	0.668894	0.727027	0.563819	0.722857	0.73542	0.745968	0.741273	0.900585	0.639423	0.603352	0.671875	0.493056	0.636672	0.742833	0.715174	0.856267	0.785125	1	0.874012	0.719268	0.368051	0.790698	0.16369	0.478469	0.364948	0.67979	0.34375	0.56341	0.87037	0.957447	0.841969
12	0.809701	0.700565	0.758755	0.82963	0.733333	0.77591	0.786026	0.760563	0.697761	0.707819	0.839378	0.688797	0.694139	0.719523	0.589723	0.533443	0.64158	0.640259	0.681045	0.728378	0.580905	0.739286	0.748933	0.750672	0.724846	0.902047	0.649038	0.608939	0.6875	0.458333	0.73854	0.693086	0.714677	0.850772	0.797114	1	0.883537	0.719268	0.381569	0.844961	0.169643	0.447368	0.364948	0.687664	0.333333	0.528067	0.87037	0.978723	0.834197
13	0.813433	0.700565	0.766537	0.833333	0.736842	0.778711	0.790393	0.760563	0.701493	0.707819	0.84456	0.692946	0.692308	0.716774	0.591304	0.532618	0.630292	0.637833	0.701094	0.734459	0.571357	0.748571	0.743243	0.757392	0.728953	0.902047	0.649038	0.586592	0.675781	0.503472	0.747029	0.637437	0.714428	0.848384	0.787263	1	0.8883	1	0.381569	0.844961	0.169643	0.425837	0.36701	0.700787	0.333333	0.449064	0.87037	0.978723	0.834197
14	0.817164	0.70339	0.766537	0.837037	0.736842	0.778711	0.79476	0.765258	0.705224	0.711934	0.849741	0.692946	0.690476	0.71494	0.588933	0.530966	0.626529	0.637025	0.695626	0.735811	0.566834	0.74	0.72973	0.751344	0.73306	0.906433	0.649038	0.592179	0.6875	0.434028	0.741935	0.575885	0.713184	0.845517	0.826206	1	0.884295	0.654696	0.384948	0.852713	0.171131	0.423445	0.402062	0.67979	0.34375	0.621622	0.87037	0.978723	0.834197
15	0.820896	0.70339	0.766537	0.837037	0.736842	0.781513	0.79476	0.765258	0.705224	0.711934	0.849741	0.697095	0.690476	0.715857	0.587352	0.530966	0.624647	0.637833	0.68712	0.728378	0.562312	0.737857	0.737553	0.757392	0.724846	0.906433	0.634615	0.592179	0.691406	0.420139	0.764007	0.555649	0.713184	0.843367	0.846594	1	0.890248	0.654696	0.391707	0.860465	0.174107	0.449761	0.364948	0.674541	0.34375	0.64657	0.87037	0.978723	0.841969
16	0.820896	0.706215	0.770428	0.837037	0.736842	0.781513	0.79476	0.769953	0.708955	0.711934	0.849741	0.697095	0.693223	0.719523	0.588933	0.532618	0.62841	0.641876	0.683475	0.719595	0.564322	0.735	0.733997	0.754704	0.728953	0.903509	0.625	0.592179	0.6875	0.440972	0.75382	0.639123	0.713682	0.834607	0.82361	1	0.888841	0.654696	0.395086	0.868217	0.174107	0.471292	0.373196	0.682415	0.333333	0.617464	0.87037	0.978723	0.841969
17	0.824627	0.706215	0.770428	0.840741	0.740351	0.781513	0.799127	0.769953	0.708955	0.716049	0.854922	0.701245	0.696886	0.725023	0.592885	0.536746	0.62841	0.644301	0.68712	0.731081	0.567839	0.737857	0.74111	0.757392	0.73306	0.906433	0.620192	0.592179	0.679688	0.434028	0.755518	0.633221	0.712687	0.835165	0.793983	1	0.889382	0.676105	0.391707	0.875969	0.174107	0.394737	0.381443	0.674541	0.34375	0.444906	0.851852	1	0.84456
18	0.824627	0.70904	0.770428	0.840741	0.740351	0.781513	0.799127	0.769953	0.708955	0.716049	0.849741	0.697095	0.700549	0.725023	0.592885	0.538398	0.658514	0.644301	0.688335	0.736486	0.564824	0.736429	0.741821	0.755376	0.73922	0.907895	0.600962	0.592179	0.671875	0.506944	0.758913	0.650927	0.716169	0.844004	0.797954	1	0.901829	0.676105	0.384948	0.860465	0.172619	0.409091	0.414433	0.685039	0.34375	0.582121	0.87037	1	0.84456
19	0.824627	0.706215	0.770428	0.840741	0.733333	0.778711	0.79476	0.760563	0.705224	0.707819	0.84456	0.692946	0.700549	0.721357	0.585771	0.537572	0.675447	0.642684	0.687728	0.741216	0.563819	0.740714	0.734708	0.750672	0.743326	0.910819	0.548077	0.608939	0.664062	0.40625	0.764007	0.645868	0.718657	0.847269	0.804062	1	0.892737	0.676105	0.37481	0.829457	0.168155	0.416268	0.402062	0.682415	0.34375	0.571726	0.87037	0.957447	0.849741
20	0.820896	0.700565	0.766537	0.837037	0.729825	0.778711	0.790393	0.755869	0.701493	0.703704	0.834197	0.688797	0.696886	0.72044	0.583399	0.536746	0.673565	0.641876	0.690158	0.746622	0.565829	0.745	0.747511	0.752016	0.743326	0.912281	0.552885	0.608939	0.667969	0.46875	0.757216	0.657673	0.724378	0.847906	0.763668	1	0.884295	0.676105	0.368051	0.806202	0.16369	0.433014	0.369072	0.658793	0.333333	0.440748	0.888889	0.93617	0.857513
21	0.820896	0.700565	0.766537	0.837037	0.729825	0.778711	0.790393	0.755869	0.701493	0.703704	0.834197	0.688797	0.696886	0.721357	0.581028	0.535921	0.66604	0.642684	0.690765	0.747297	0.565327	0.745714	0.746799	0.75336	0.743326	0.912281	0.552885	0.603352	0.671875	0.375	0.765705	0.65683	0.724627	0.847269	0.76909	1	0.874337	0.676105	0.368051	0.806202	0.16369	0.45933	0.410309	0.658793	0.333333	0.519751	0.87037	0.93617	0.857513
22	0.813433	0.69774	0.758755	0.833333	0.726316	0.778711	0.781659	0.751174	0.690299	0.695473	0.823834	0.680498	0.696886	0.719523	0.582609	0.535921	0.66604	0.641067	0.692588	0.750676	0.567839	0.747857	0.751067	0.754704	0.743326	0.916667	0.576923	0.614525	0.710938	0.416667	0.764007	0.602024	0.724378	0.852365	0.789401	1	0.872389	0.676105	0.368051	0.806202	0.162202	0.461722	0.410309	0.664042	0.333333	0.525988	0.87037	0.914894	0.862694
23	0.813433	0.694915	0.758755	0.82963	0.719298	0.77591	0.777293	0.741784	0.690299	0.691358	0.813472	0.676349	0.697802	0.72044	0.582609	0.537572	0.667921	0.641067	0.698056	0.752027	0.562312	0.754286	0.743954	0.758737	0.743326	0.919591	0.543269	0.608939	0.6875	0.381944	0.767402	0.610455	0.726617	0.854117	0.775809	1	0.863946	0.676105	0.368051	0.806202	0.16369	0.449761	0.36701	0.656168	0.333333	0.530146	0.87037	0.914894	0.860104
24	0.809701	0.69209	0.754864	0.825926	0.715789	0.77591	0.777293	0.741784	0.690299	0.691358	0.813472	0.676349	0.699634	0.719523	0.582609	0.535921	0.675447	0.641067	0.698056	0.750676	0.562312	0.752857	0.743954	0.758065	0.743326	0.921053	0.533654	0.614525	0.699219	0.375	0.758913	0.639966	0.724876	0.852922	0.782071	1	0.862539	0.676105	0.368051	0.806202	0.16369	0.440191	0.36701	0.653543	0.333333	0.515593	0.87037	0.914894	0.862694
25	0.798507	0.69209	0.750973	0.814815	0.733333	0.795518	0.759825	0.751174	0.686567	0.695473	0.487047	0.676349	0.696886	0.72319	0.582609	0.534269	0.694262	0.642684	0.691981	0.728378	0.563819	0.742143	0.738976	0.758737	0.728953	0.906433	0.653846	0.541899	0.582031	0.604167	0.752122	0.639123	0.726119	0.853639	0.59858	1	0.885052	0.676105	0.341016	0.713178	0.14881	0.42823	0.414433	0.616798	0.302083	0.328482	0.87963	0.93617	0.849741
26	0.798507	0.69209	0.750973	0.818519	0.733333	0.798319	0.759825	0.746479	0.686567	0.695473	0.481865	0.676349	0.696886	0.721357	0.577866	0.533443	0.682032	0.640259	0.690765	0.725676	0.565327	0.745	0.720484	0.760081	0.720739	0.897661	0.677885	0.541899	0.578125	0.552083	0.757216	0.623946	0.730348	0.856745	0.634621	1	0.875636	0.676105	0.341016	0.705426	0.14881	0.404306	0.414433	0.616798	0.302083	0.430353	0.887037	0.93617	0.84456
27	0.794776	0.69209	0.750973	0.818519	0.733333	0.795518	0.759825	0.741784	0.686567	0.695473	0.497409	0.676349	0.694139	0.718607	0.577075	0.532618	0.64158	0.636217	0.690765	0.727027	0.566332	0.752143	0.726174	0.760081	0.720739	0.894737	0.629808	0.564246	0.585938	0.475694	0.760611	0.608769	0.731095	0.856824	0.620648	1	0.879965	0.676105	0.344395	0.705426	0.14881	0.406699	0.410309	0.606299	0.302083	0.424116	0.887037	0.914894	0.841969
28	0.794776	0.689266	0.750973	0.814815	0.729825	0.795518	0.759825	0.741784	0.682836	0.691358	0.487047	0.676349	0.693223	0.714024	0.574704	0.532618	0.66604	0.6346	0.688335	0.727027	0.565829	0.743571	0.729018	0.758737	0.720739	0.893275	0.557692	0.558659	0.59375	0.5625	0.777589	0.600337	0.730846	0.858019	0.638974	1	0.855179	0.676105	0.344395	0.705426	0.147321	0.404306	0.435052	0.608924	0.302083	0.386694	0.874074	0.914894	0.841969
29	0.794776	0.689266	0.750973	0.818519	0.729825	0.792717	0.764192	0.741784	0.682836	0.695473	0.481865	0.676349	0.692308	0.716774	0.572332	0.529315	0.686736	0.637025	0.690158	0.729054	0.569849	0.740714	0.738976	0.756048	0.708419	0.894737	0.586538	0.541899	0.5625	0.572917	0.762309	0.581788	0.731841	0.857461	0.626985	1	0.853014	0.676105	0.341016	0.705426	0.145833	0.442584	0.408247	0.622047	0.302083	0.426195	0.874074	0.914894	0.841969
30	0.794776	0.689266	0.750973	0.818519	0.729825	0.792717	0.764192	0.741784	0.682836	0.695473	0.414508	0.676349	0.692308	0.715857	0.576285	0.530966	0.650988	0.636217	0.681045	0.725676	0.564322	0.732143	0.725462	0.754704	0.714579	0.894737	0.625	0.547486	0.570312	0.534722	0.767402	0.589376	0.732836	0.860487	0.642639	1	0.849118	0.697514	0.341016	0.705426	0.147321	0.449761	0.397938	0.608924	0.302083	0.438669	0.874074	0.914894	0.834197
31	0.794776	0.686441	0.750973	0.818519	0.726316	0.789916	0.764192	0.741784	0.682836	0.691358	0.38342	0.676349	0.696886	0.72044	0.577075	0.533443	0.643462	0.637025	0.683475	0.723649	0.559799	0.722857	0.720484	0.756048	0.718686	0.899123	0.634615	0.536313	0.574219	0.5	0.770798	0.591062	0.731095	0.858098	0.628742	1	0.868492	0.697514	0.341016	0.705426	0.147321	0.425837	0.393814	0.608924	0.302083	0.432432	0.87963	0.914894	0.834197
32	0.794776	0.686441	0.747082	0.818519	0.729825	0.789916	0.764192	0.741784	0.682836	0.691358	0.476684	0.676349	0.695055	0.71769	0.577075	0.532618	0.652869	0.637833	0.680437	0.722973	0.557286	0.721429	0.71835	0.75336	0.716632	0.899123	0.615385	0.52514	0.546875	0.538194	0.777589	0.605396	0.728109	0.855391	0.642639	1	0.875419	0.697514	0.337636	0.705426	0.147321	0.406699	0.391753	0.603675	0.302083	0.419958	0.874074	0.914894	0.834197
33	0.802239	0.69209	0.747082	0.818519	0.733333	0.792717	0.768559	0.746479	0.690299	0.699588	0.440415	0.680498	0.693223	0.715857	0.578656	0.530966	0.669802	0.637025	0.68712	0.725676	0.566332	0.725	0.721195	0.761425	0.728953	0.907895	0.649038	0.52514	0.546875	0.5625	0.786078	0.623946	0.726617	0.855311	0.632254	1	0.886135	0.719268	0.334257	0.697674	0.147321	0.389952	0.406186	0.64042	0.322917	0.453222	0.874074	0.93617	0.841969
34	0.802239	0.69209	0.750973	0.822222	0.733333	0.789916	0.772926	0.751174	0.690299	0.703704	0.818653	0.684647	0.692308	0.715857	0.575494	0.531792	0.632173	0.635408	0.690158	0.728378	0.568342	0.737857	0.728307	0.762769	0.73922	0.907895	0.576923	0.530726	0.542969	0.635417	0.786078	0.608769	0.724378	0.854834	0.639508	1	0.888516	0.719268	0.337636	0.705426	0.14881	0.409091	0.418557	0.632546	0.322917	0.417879	0.883333	0.93617	0.849741
35	0.80597	0.694915	0.754864	0.822222	0.733333	0.792717	0.777293	0.751174	0.69403	0.703704	0.823834	0.688797	0.685897	0.713107	0.570751	0.527663	0.617121	0.632983	0.68469	0.725676	0.564824	0.736429	0.722617	0.761425	0.743326	0.909357	0.610577	0.541899	0.527344	0.569444	0.791171	0.629848	0.724129	0.854913	0.667685	1	0.89566	0.719268	0.344395	0.713178	0.150298	0.368421	0.447423	0.669291	0.333333	0.515593	0.883333	0.957447	0.849741
36	0.809701	0.700565	0.758755	0.825926	0.747368	0.792717	0.781659	0.755869	0.69403	0.707819	0.829016	0.688797	0.684066	0.708524	0.572332	0.526012	0.616181	0.629749	0.685905	0.722973	0.566332	0.742143	0.740398	0.757392	0.74538	0.915205	0.610577	0.547486	0.535156	0.555556	0.816638	0.647555	0.723881	0.854515	0.658827	1	0.878775	0.719268	0.344395	0.72093	0.151786	0.34689	0.408247	0.666667	0.333333	0.492723	0.87963	0.957447	0.862694
37	0.809701	0.69774	0.762646	0.825926	0.74386	0.795518	0.781659	0.755869	0.69403	0.707819	0.829016	0.688797	0.684066	0.708524	0.572332	0.526012	0.61524	0.629749	0.68712	0.723649	0.565829	0.743571	0.746088	0.757392	0.74538	0.915205	0.610577	0.541899	0.539062	0.559028	0.814941	0.649241	0.723134	0.854834	0.659973	1	0.875636	0.719268	0.341016	0.713178	0.150298	0.409091	0.449485	0.658793	0.333333	0.503119	0.87963	0.957447	0.862694
38	0.80597	0.69774	0.762646	0.825926	0.740351	0.789916	0.777293	0.751174	0.69403	0.703704	0.829016	0.688797	0.685897	0.706691	0.568379	0.523534	0.652869	0.628133	0.688943	0.729054	0.568844	0.743571	0.743954	0.761425	0.749487	0.918129	0.658654	0.530726	0.542969	0.586806	0.820034	0.682125	0.726866	0.85555	0.771228	1	0.874121	0.719268	0.334257	0.705426	0.150298	0.433014	0.37732	0.692913	0.34375	0.455301	0.875926	0.93617	0.865285
39	0.80597	0.700565	0.758755	0.825926	0.740351	0.787115	0.777293	0.751174	0.69403	0.703704	0.823834	0.688797	0.684066	0.706691	0.570751	0.522709	0.662277	0.628941	0.693803	0.734459	0.570352	0.750714	0.746088	0.762769	0.753593	0.919591	0.649038	0.547486	0.578125	0.486111	0.811545	0.680438	0.725373	0.85563	0.760538	1	0.887325	0.719268	0.341016	0.713178	0.150298	0.4689	0.406186	0.698163	0.34375	0.523909	0.875926	0.93617	0.867876
40	0.80597	0.700565	0.758755	0.825926	0.740351	0.787115	0.772926	0.751174	0.690299	0.703704	0.823834	0.684647	0.68315	0.704858	0.570751	0.522709	0.669802	0.628133	0.68955	0.734459	0.569849	0.747143	0.731152	0.761425	0.749487	0.918129	0.658654	0.547486	0.582031	0.517361	0.826825	0.651771	0.500995	0.85563	0.75817	1	0.886784	0.719268	0.341016	0.713178	0.150298	0.452153	0.371134	0.690289	0.34375	0.482328	0.874074	0.93617	0.867876
41	0.80597	0.700565	0.758755	0.825926	0.736842	0.784314	0.777293	0.751174	0.69403	0.703704	0.829016	0.684647	0.684982	0.708524	0.570751	0.525186	0.654751	0.632175	0.694411	0.733108	0.572362	0.75	0.741821	0.765457	0.74538	0.909357	0.629808	0.555866	0.613281	0.6875	0.816638	0.698145	0.721642	0.854197	0.715791	1	0.906267	0.719268	0.354533	0.744186	0.15625	0.447368	0.371134	0.690289	0.34375	0.438669	0.87037	0.978723	0.867876
42	0.80597	0.700565	0.758755	0.825926	0.736842	0.784314	0.777293	0.751174	0.69403	0.703704	0.829016	0.688797	0.68956	0.712191	0.573913	0.526012	0.667921	0.6346	0.690765	0.733784	0.575377	0.743571	0.744666	0.750672	0.743326	0.904971	0.658654	0.564246	0.613281	0.552083	0.772496	0.6914	0.722388	0.854595	0.762981	1	0.897716	0.719268	0.351154	0.736434	0.157738	0.471292	0.371134	0.692913	0.333333	0.49896	0.87037	0.978723	0.862694
43	0.80597	0.700565	0.758755	0.825926	0.733333	0.787115	0.777293	0.751174	0.69403	0.703704	0.829016	0.684647	0.690476	0.714024	0.574704	0.529315	0.671684	0.635408	0.694411	0.735135	0.577889	0.745	0.74111	0.760081	0.73922	0.902047	0.658654	0.564246	0.617188	0.635417	0.777589	0.683811	0.723383	0.854037	0.700901	1	0.896309	0.719268	0.347775	0.728682	0.15625	0.442584	0.387629	0.692913	0.333333	0.505198	0.87037	0.93617	0.862694
44	0.80597	0.700565	0.758755	0.825926	0.736842	0.784314	0.772926	0.751174	0.69403	0.703704	0.829016	0.684647	0.687729	0.71494	0.576285	0.531792	0.647225	0.637025	0.693803	0.734459	0.830151	0.749286	0.749644	0.761425	0.743326	0.903509	0.634615	0.558659	0.601562	0.489583	0.745331	0.661046	0.725871	0.85563	0.749771	1	0.880398	0.719268	0.351154	0.728682	0.154762	0.399522	0.362887	0.692913	0.333333	0.484407	0.888889	0.93617	0.857513
45	0.80597	0.69774	0.758755	0.825926	0.736842	0.784314	0.772926	0.751174	0.69403	0.699588	0.829016	0.684647	0.691392	0.71769	0.578656	0.529315	0.634055	0.637025	0.698056	0.732432	0.578392	0.743571	0.751067	0.764113	0.743326	0.907895	0.663462	0.586592	0.628906	0.447917	0.818336	0.607083	0.731592	0.863115	0.756796	1	0.865895	0.719268	0.341016	0.744186	0.15625	0.406699	0.313402	0.692913	0.333333	0.45738	0.87037	0.893617	0.857513
46	0.798507	0.69209	0.750973	0.822222	0.729825	0.778711	0.768559	0.741784	0.686567	0.695473	0.818653	0.676349	0.695055	0.718607	0.573913	0.530966	0.66604	0.638642	0.690765	0.739865	0.574874	0.740714	0.740398	0.758065	0.73922	0.906433	0.682692	0.569832	0.613281	0.520833	0.711375	0.650927	0.732836	0.864071	0.759698	1	0.856694	0.719268	0.347775	0.728682	0.154762	0.480861	0.369072	0.692913	0.333333	0.503119	0.87037	0.893617	0.857513
47	0.791045	0.689266	0.747082	0.818519	0.722807	0.77591	0.764192	0.732394	0.682836	0.687243	0.80829	0.66805	0.697802	0.72319	0.580237	0.532618	0.682973	0.642684	0.700486	0.743919	0.574874	0.748571	0.751067	0.758737	0.73306	0.904971	0.677885	0.564246	0.617188	0.444444	0.704584	0.663575	0.73408	0.863115	0.74183	1	0.866869	0.719268	0.337636	0.713178	0.151786	0.41866	0.360825	0.692913	0.333333	0.467775	0.87037	0.893617	0.849741
48	0.791045	0.686441	0.743191	0.814815	0.719298	0.770308	0.764192	0.732394	0.682836	0.683128	0.80829	0.6639	0.693223	0.734189	0.582609	0.534269	0.649106	0.643492	0.690158	0.737838	0.571357	0.747857	0.755334	0.758065	0.728953	0.897661	0.629808	0.558659	0.605469	0.506944	0.821732	0.692243	0.731592	0.865106	0.760919	1	0.865895	0.719268	0.337636	0.713178	0.151786	0.435407	0.383505	0.692913	0.333333	0.515593	0.87037	0.87234	0.849741
49	0.955224	0.740113	0.856031	0.911111	0.691228	0.579832	0.742358	1	0.735075	0.73251	0.896373	0.958506	0.699634	0.729606	0.633992	0.64905	0.733772	0.6346	0.654313	0.739189	0.623618	0.696429	0.697724	0.744624	0.823409	0.912281	0.677885	0.648045	0.722656	0.75	0.804754	0.74199	0.926617	0.854515	0.744502	0	0.664899	0.676105	0.915515	0.821705	0.950893	0.296651	0.336082	0.254593	0.375	0.507277	0.890741	0.744681	0.981865
50	0.955224	0.742938	0.856031	0.911111	0.691228	0.579832	0.737991	0.995305	0.735075	0.73251	0.896373	0.958506	0.703297	0.727773	0.63004	0.639967	0.712135	0.6346	0.656136	0.738514	0.612563	0.702857	0.705548	0.749328	0.819302	0.903509	0.677885	0.653631	0.675781	0.743056	0.779287	0.709949	0.9301	0.851011	0.742211	0	0.666739	0.676105	0.915515	0.837209	0.950893	0.299043	0.346392	0.254593	0.375	0.367983	0.890741	0.744681	0.981865
51	0.955224	0.742938	0.856031	0.911111	0.691228	0.579832	0.737991	0.995305	0.738806	0.73251	0.896373	0.958506	0.699634	0.729606	0.63004	0.642444	0.710254	0.628941	0.659781	0.741216	0.616583	0.71	0.707681	0.756048	0.823409	0.906433	0.677885	0.670391	0.691406	0.711806	0.779287	0.703204	0.934577	0.852763	0.780925	0	0.657322	0.676105	0.912135	0.837209	0.950893	0.296651	0.356701	0.254593	0.375	0.376299	0.872222	0.723404	0.979275
52	0.955224	0.742938	0.856031	0.911111	0.687719	0.577031	0.737991	0.99061	0.735075	0.728395	0.88601	0.958506	0.705128	0.724106	0.626087	0.64327	0.719661	0.631366	0.659781	0.740541	0.621608	0.702857	0.70128	0.757392	0.815195	0.900585	0.677885	0.659218	0.675781	0.753472	0.792869	0.711636	0.932338	0.853639	0.779246	0	0.661002	0.676105	0.912135	0.837209	0.950893	0.282297	0.424742	0.254593	0.375	0.426195	0.874074	0.723404	0.979275
53	0.955224	0.742938	0.859922	0.907407	0.687719	0.577031	0.737991	0.99061	0.738806	0.73251	0.891192	0.954357	0.701465	0.722273	0.626877	0.642444	0.725306	0.629749	0.659781	0.739865	0.627638	0.697143	0.698435	0.760081	0.806982	0.900585	0.673077	0.636872	0.679688	0.78125	0.770798	0.70742	0.933333	0.85563	0.748091	0	0.659595	0.676105	0.908756	0.837209	0.950893	0.289474	0.414433	0.254593	0.375	0.424116	0.862963	0.723404	0.974093
54	0.951493	0.742938	0.859922	0.911111	0.687719	0.577031	0.737991	0.99061	0.738806	0.73251	0.891192	0.954357	0.694139	0.72044	0.619763	0.639967	0.712135	0.628941	0.662211	0.745946	0.620603	0.695714	0.699858	0.760081	0.815195	0.891813	0.673077	0.642458	0.675781	0.71875	0.814941	0.709949	0.934577	0.85125	0.737783	0	0.660461	0.697514	0.908756	0.837209	0.950893	0.303828	0.404124	0.254593	0.375	0.343035	0.868519	0.723404	0.971503
55	0.947761	0.742938	0.859922	0.911111	0.687719	0.577031	0.733624	0.985915	0.731343	0.728395	0.880829	0.954357	0.699634	0.72044	0.627668	0.639967	0.722484	0.629749	0.657959	0.745946	0.619598	0.686429	0.694879	0.757392	0.802875	0.900585	0.673077	0.642458	0.671875	0.708333	0.792869	0.702361	0.934577	0.849817	0.796274	0	0.661868	0.697514	0.908756	0.829457	0.950893	0.291866	0.331959	0.254593	0.375	0.365904	0.868519	0.723404	0.963731
56	0.947761	0.742938	0.859922	0.911111	0.684211	0.577031	0.733624	0.981221	0.731343	0.728395	0.88601	0.954357	0.699634	0.718607	0.617391	0.63749	0.720602	0.631366	0.656744	0.745946	0.618593	0.684286	0.692034	0.756048	0.802875	0.897661	0.673077	0.642458	0.667969	0.729167	0.792869	0.698145	0.932587	0.851409	0.806353	0	0.661868	0.697514	0.905377	0.829457	0.950893	0.287081	0.4	0.254593	0.375	0.390852	0.859259	0.723404	0.963731
57	0.951493	0.742938	0.863813	0.914815	0.687719	0.579832	0.737991	0.985915	0.738806	0.736626	0.891192	0.954357	0.694139	0.716774	0.625296	0.63749	0.71778	0.632175	0.657351	0.746622	0.620603	0.686429	0.693457	0.760081	0.811088	0.906433	0.682692	0.653631	0.679688	0.767361	0.79966	0.699831	0.927114	0.850056	0.828345	0	0.666847	0.719268	0.908756	0.829457	0.950893	0.299043	0.338144	0.262467	0.385417	0.361746	0.87963	0.744681	0.968912
58	0.955224	0.745763	0.867704	0.914815	0.687719	0.579832	0.742358	0.985915	0.738806	0.740741	0.896373	0.958506	0.692308	0.71494	0.623715	0.63749	0.709313	0.629749	0.658566	0.746622	0.624121	0.696429	0.696302	0.757392	0.823409	0.909357	0.682692	0.648045	0.660156	0.78125	0.801358	0.712479	0.928607	0.849339	0.820785	0	0.667605	0.719268	0.912135	0.829457	0.964286	0.291866	0.435052	0.262467	0.385417	0.313929	0.87963	0.744681	0.976684
59	0.955224	0.748588	0.871595	0.918519	0.691228	0.582633	0.746725	0.985915	0.742537	0.740741	0.896373	0.958506	0.684982	0.707608	0.619763	0.630884	0.703669	0.624091	0.655529	0.746622	0.624121	0.698571	0.694168	0.822581	0.827515	0.909357	0.6875	0.648045	0.660156	0.809028	0.82343	0.709106	0.930846	0.852285	0.830254	0	0.663816	0.719268	0.908756	0.829457	0.950893	0.291866	0.412371	0.270341	0.385417	0.284823	0.87963	0.744681	0.984456
60	0.958955	0.751412	0.875486	0.918519	0.694737	0.585434	0.746725	0.985915	0.746269	0.744856	0.896373	0.958506	0.675824	0.702108	0.61502	0.625929	0.699906	0.61924	0.651883	0.739189	0.620603	0.701429	0.698435	0.757392	0.827515	0.915205	0.6875	0.642458	0.640625	0.760417	0.840407	0.709949	0.928607	0.854356	0.799939	0	0.663492	0.719268	0.912135	0.844961	0.950893	0.277512	0.412371	0.259843	0.385417	0.303534	0.87963	0.744681	0.989637
61	0.958955	0.751412	0.875486	0.918519	0.694737	0.588235	0.746725	0.985915	0.746269	0.744856	0.896373	0.958506	0.677656	0.703941	0.61502	0.625929	0.696143	0.61924	0.651883	0.741892	0.625126	0.701429	0.699147	0.758737	0.827515	0.912281	0.6875	0.642458	0.648438	0.736111	0.842105	0.716695	0.926866	0.857143	0.815745	0	0.662626	0.719268	0.908756	0.844961	0.950893	0.287081	0.410309	0.262467	0.385417	0.324324	0.87963	0.744681	0.989637
62	0.955224	0.751412	0.875486	0.918519	0.694737	0.585434	0.746725	0.985915	0.746269	0.740741	0.896373	0.958506	0.679487	0.700275	0.613439	0.61602	0.694262	0.612773	0.659781	0.747297	0.620101	0.699286	0.704125	0.758737	0.815195	0.909357	0.682692	0.636872	0.644531	0.763889	0.837012	0.737774	0.928358	0.850215	0.793907	0	0.66728	0.719268	0.908756	0.837209	0.950893	0.279904	0.424742	0.262467	0.385417	0.307692	0.87963	0.744681	0.984456
63	0.955224	0.748588	0.871595	0.914815	0.691228	0.585434	0.746725	0.981221	0.746269	0.740741	0.891192	0.958506	0.673993	0.698442	0.613439	0.619323	0.698965	0.612773	0.657351	0.75	0.622613	0.707143	0.701991	0.765457	0.806982	0.897661	0.682692	0.625698	0.652344	0.739583	0.837012	0.801012	0.926119	0.849737	0.800092	0	0.665981	0.719268	0.912135	0.837209	0.950893	0.289474	0.406186	0.262467	0.385417	0.316008	0.868519	0.744681	0.974093
64	0.955224	0.748588	0.871595	0.914815	0.691228	0.585434	0.742358	0.981221	0.746269	0.740741	0.88601	0.958506	0.672161	0.700275	0.612648	0.617671	0.702728	0.609539	0.653098	0.75	0.619598	0.704286	0.701991	0.768145	0.802875	0.897661	0.682692	0.614525	0.648438	0.729167	0.845501	0.819562	0.923383	0.852126	0.815134	0	0.666089	0.719268	0.905377	0.837209	0.950893	0.296651	0.34433	0.259843	0.385417	0.397089	0.868519	0.744681	0.968912
65	0.955224	0.748588	0.875486	0.918519	0.691228	0.585434	0.742358	0.981221	0.746269	0.740741	0.891192	0.958506	0.673993	0.700275	0.613439	0.632535	0.696143	0.612773	0.660996	0.748649	0.620603	0.695714	0.697724	0.763441	0.806982	0.897661	0.682692	0.625698	0.640625	0.739583	0.852292	0.88027	0.925373	0.846552	0.807804	0	0.668146	0.719268	0.905377	0.844961	0.950893	0.299043	0.331959	0.259843	0.385417	0.367983	0.87037	0.744681	0.963731
66	0.955224	0.748588	0.875486	0.914815	0.691228	0.585434	0.746725	0.981221	0.75	0.740741	0.891192	0.958506	0.677656	0.700275	0.613439	0.625929	0.701787	0.615198	0.661604	0.75	0.618593	0.693571	0.699858	0.770161	0.811088	0.903509	0.682692	0.620112	0.644531	0.763889	0.857385	0.903879	0.923632	0.850772	0.819945	0	0.668038	0.719268	0.692474	0.837209	0.950893	0.301435	0.338144	0.259843	0.385417	0.367983	0.87037	0.744681	0.971503
67	0.955224	0.751412	0.875486	0.914815	0.691228	0.585434	0.742358	0.976526	0.75	0.740741	0.891192	0.958506	0.673993	0.706691	0.611067	0.624277	0.698965	0.615198	0.659781	0.750676	0.617085	0.691429	0.698435	0.769489	0.819302	0.906433	0.682692	0.625698	0.636719	0.78125	0.850594	0.874368	0.925373	0.8491	0.809102	0	0.666847	0.719268	0.88848	0.837209	0.950893	0.303828	0.342268	0.259843	0.385417	0.430353	0.87037	0.744681	0.976684
68	0.947761	0.748588	0.871595	0.911111	0.691228	0.585434	0.742358	0.971831	0.746269	0.740741	0.891192	0.958506	0.673993	0.698442	0.607115	0.622626	0.698965	0.616006	0.658566	0.747973	0.617588	0.691429	0.699147	0.757392	0.831622	0.923977	0.677885	0.625698	0.621094	0.78125	0.803056	0.828836	0.929602	0.854595	0.829872	0	0.667713	0.719268	0.8851	0.837209	0.950893	0.291866	0.340206	0.259843	0.385417	0.403326	0.87037	0.744681	0.984456
69	0.947761	0.745763	0.871595	0.907407	0.687719	0.585434	0.737991	0.971831	0.738806	0.740741	0.891192	0.958506	0.672161	0.698442	0.607905	0.639967	0.698965	0.61924	0.650668	0.743243	0.620101	0.701429	0.700569	0.758065	0.835729	0.923977	0.668269	0.642458	0.632812	0.729167	0.848896	0.789207	0.935075	0.859054	0.819563	0	0.669337	0.719268	0.881721	0.829457	0.950893	0.289474	0.334021	0.259843	0.385417	0.309771	0.888889	0.744681	0.987047
70	0.940299	0.742938	0.863813	0.9	0.684211	0.579832	0.729258	0.967136	0.731343	0.73251	0.880829	0.958506	0.679487	0.702108	0.607905	0.624277	0.701787	0.617623	0.659781	0.752027	0.617588	0.702857	0.694879	0.760081	0.827515	0.921053	0.663462	0.625698	0.636719	0.791667	0.83871	0.811973	0.932836	0.86001	0.787492	0	0.667713	0.719268	0.878341	0.813953	0.950893	0.303828	0.352577	0.259843	0.385417	0.303534	0.907407	0.744681	0.992228
71	0.932836	0.740113	0.859922	0.896296	0.680702	0.57423	0.724891	0.967136	0.731343	0.728395	0.875648	0.958506	0.673993	0.698442	0.607905	0.617671	0.702728	0.622474	0.659174	0.756081	0.621608	0.71	0.696302	0.764785	0.823409	0.906433	0.658654	0.642458	0.636719	0.78125	0.840407	0.836425	0.935075	0.8577	0.794899	0	0.668254	0.719268	0.874962	0.806202	0.950893	0.291866	0.336082	0.259843	0.385417	0.411642	0.907407	0.744681	0.989637
72	0.929104	0.737288	0.856031	0.892593	0.677193	0.57423	0.720524	0.962441	0.727612	0.72428	0.875648	0.958506	0.67674	0.700275	0.606324	0.622626	0.698965	0.615198	0.651276	0.746622	0.617588	0.71	0.696302	0.758065	0.823409	0.894737	0.653846	0.631285	0.628906	0.736111	0.843803	0.94941	0.935572	0.858019	0.803528	0	0.670311	0.719268	0.874962	0.806202	0.950893	0.296651	0.346392	0.259843	0.385417	0.384615	0.907407	0.744681	0.984456
73	0.925373	0.734463	0.949416	0.72963	0.673684	0.571429	0.720524	0.957746	0.723881	0.72428	0.870466	0.946058	0.67033	0.694775	0.604743	0.614368	0.711195	0.610348	0.667679	0.756081	0.629146	0.712857	0.700569	0.761425	0.815195	0.906433	0.653846	0.620112	0.617188	0.743056	0.843803	0.968803	0.930348	0.856904	0.835675	0	0.657972	0.719268	0.871583	0.790698	0.950893	0.308612	0.591753	0.270341	0.385417	0.417879	0.851852	0.765957	0.971503
74	0.921642	0.734463	0.949416	0.725926	0.670175	0.568627	0.716157	0.953052	0.720149	0.72428	0.870466	0.946058	0.675824	0.692942	0.597628	0.614368	0.699906	0.611156	0.664642	0.750676	0.623116	0.714286	0.701991	0.758737	0.806982	0.897661	0.649038	0.631285	0.644531	0.774306	0.843803	0.990725	0.93607	0.860647	0.801924	0	0.662085	0.719268	0.874962	0.806202	0.950893	0.303828	0.591753	0.267717	0.385417	0.424116	0.851852	0.765957	0.968912
75	0.914179	0.734463	0.941634	0.722222	0.666667	0.565826	0.71179	0.948357	0.720149	0.720165	0.865285	0.941909	0.666667	0.687443	0.593676	0.607762	0.700847	0.607922	0.637303	0.752703	0.120101	0.704286	0.699147	0.761425	0.802875	0.888889	0.649038	0.636872	0.664062	0.743056	0.792869	0.888702	0.936567	0.860487	0.800092	0	0.663708	0.719268	0.868203	0.806202	0.950893	0.303828	0.591753	0.267717	0.385417	0.486486	0.851852	0.723404	0.974093
76	0.914179	0.731638	0.937743	0.722222	0.666667	0.565826	0.71179	0.948357	0.712687	0.720165	0.860104	0.941909	0.666667	0.690192	0.594466	0.611065	0.684854	0.56831	0.64277	0.75473	0.626131	0.699286	0.699858	0.762769	0.806982	0.894737	0.649038	0.614525	0.628906	0.774306	0.826825	0.866779	0.933085	0.862797	0.830712	0	0.66176	0.719268	0.861444	0.79845	0.950893	0.311005	0.591753	0.267717	0.385417	0.442827	0.851852	0.723404	0.966321
77	0.914179	0.731638	0.941634	0.722222	0.666667	0.565826	0.71179	0.948357	0.712687	0.720165	0.860104	0.941909	0.67033	0.691109	0.594466	0.611065	0.684854	0.607922	0.636695	0.757432	0.622613	0.693571	0.662162	0.758737	0.806982	0.890351	0.649038	0.625698	0.628906	0.78125	0.774194	0.830523	0.933582	0.861284	0.818647	0	0.664899	0.719268	0.858065	0.790698	0.950893	0.30622	0.591753	0.270341	0.385417	0.471933	0.851852	0.723404	0.96114
78	0.910448	0.731638	0.937743	0.718519	0.663158	0.563025	0.707424	0.948357	0.712687	0.720165	0.860104	0.941909	0.67033	0.692942	0.596838	0.614368	0.69238	0.607922	0.63791	0.767568	0.621106	0.687143	0.694879	0.756048	0.806982	0.903509	0.644231	0.648045	0.628906	0.78125	0.716469	0.863406	0.938557	0.863274	0.806735	0	0.664682	0.719268	0.847927	0.782946	0.950893	0.30622	0.591753	0.267717	0.385417	0.474012	0.87037	0.723404	0.963731
79	0.906716	0.731638	0.937743	0.718519	0.663158	0.563025	0.707424	0.948357	0.712687	0.716049	0.860104	0.941909	0.664835	0.691109	0.594466	0.610239	0.706491	0.611156	0.653098	0.760135	0.618593	0.685714	0.691323	0.754704	0.806982	0.906433	0.639423	0.608939	0.625	0.78125	0.801358	0.913153	0.937811	0.863673	0.810782	0	0.666306	0.719268	0.844547	0.775194	0.950893	0.30622	0.591753	0.265092	0.385417	0.505198	0.87037	0.723404	0.963731
80	0.906716	0.728814	0.937743	0.718519	0.663158	0.565826	0.71179	0.943662	0.712687	0.716049	0.860104	0.941909	0.661172	0.687443	0.592095	0.607762	0.695202	0.604689	0.654313	0.758784	0.619598	0.683571	0.698435	0.752016	0.811088	0.915205	0.639423	0.0614525	0.640625	0.09375	0.830221	0.975548	0.933831	0.867415	0.801695	0	0.664682	0.719268	0.841168	0.782946	0.950893	0.303828	0.591753	0.265092	0.385417	0.50104	0.851852	0.723404	0.968912
81	0.910448	0.731638	0.937743	0.718519	0.663158	0.568627	0.720524	0.948357	0.716418	0.720165	0.865285	0.946058	0.650183	0.683776	0.586561	0.604459	0.689558	0.602264	0.656744	0.756081	0.624121	0.685	0.703414	0.752016	0.815195	0.909357	0.649038	0.642458	0.65625	0.760417	0.814941	0.982293	0.840547	0.861204	0.542227	0	0.66176	0.719268	0.837789	0.782946	0.950893	0.291866	0.591753	0.265092	0.385417	0.397089	0.87037	0.723404	0.974093
82	0.914179	0.734463	0.941634	0.722222	0.666667	0.571429	0.729258	0.957746	0.723881	0.728395	0.875648	0.950207	0.64652	0.68011	0.587352	0.598679	0.670743	0.598222	0.644593	0.748649	0.615578	0.682857	0.694168	0.745968	0.811088	0.900585	0.649038	0.636872	0.65625	0.8125	0.814941	0.980607	0.925124	0.845437	0.757483	0	0.662193	0.719268	0.844547	0.813953	0.950893	0.296651	0.591753	0.265092	0.385417	0.390852	0.833333	0.723404	0.971503
83	0.921642	0.742938	0.945525	0.733333	0.677193	0.579832	0.742358	0.962441	0.727612	0.736626	0.88601	0.958506	0.648352	0.67736	0.582609	0.59455	0.66604	0.594988	0.639125	0.744595	0.61407	0.676429	0.687767	0.739247	0.806982	0.900585	0.658654	0.631285	0.679688	0.895833	0.791171	1	0.921144	0.847985	0.763745	0	0.660569	0.719268	0.858065	0.844961	0.950893	0.30622	0.591753	0.265092	0.385417	0.419958	0.833333	0.723404	0.966321
84	0.932836	0.748588	0.953307	0.740741	0.684211	0.582633	0.746725	0.971831	0.738806	0.744856	0.901554	0.962656	0.642857	0.67461	0.589723	0.595376	0.665099	0.592563	0.653706	0.763514	0.623116	0.686429	0.697724	0.761425	0.946612	0.909357	0.673077	0.675978	0.710938	0.829861	0.741935	0.979764	0.920647	0.846632	0.746946	0	0.667496	0.719268	0.878341	0.875969	0.950893	0.430622	0.591753	0.265092	0.385417	0.488565	0.833333	0.744681	0.974093
85	0.932836	0.751412	0.957198	0.744444	0.687719	0.585434	0.746725	0.971831	0.742537	0.744856	0.906736	0.966805	0.644689	0.67461	0.591304	0.592073	0.66604	0.592563	0.662211	0.744595	0.602513	0.695	0.70128	0.75672	0.819302	0.909357	0.673077	0.642458	0.6875	0.805556	0.757216	0.841484	0.920647	0.841615	0.749771	0	0.666955	0.719268	0.881721	0.883721	0.950893	0.291866	0.591753	0.265092	0.385417	0.455301	0.833333	0.744681	0.974093
86	0.936567	0.751412	0.961089	0.748148	0.691228	0.585434	0.746725	0.976526	0.746269	0.748971	0.906736	0.970954	0.648352	0.67461	0.592095	0.592073	0.66604	0.594988	0.643985	0.72973	0.59397	0.7	0.70697	0.749328	0.811088	0.909357	0.677885	0.642458	0.695312	0.829861	0.75382	0.86425	0.9199	0.839863	0.752367	0	0.665765	0.719268	0.895238	0.883721	0.950893	0.311005	0.591753	0.265092	0.385417	0.513514	0.833333	0.744681	0.971503
87	0.940299	0.751412	0.961089	0.751852	0.694737	0.585434	0.746725	0.976526	0.75	0.748971	0.911917	0.970954	0.653846	0.67736	0.595257	0.596201	0.671684	0.597413	0.642163	0.740541	0.618593	0.695	0.690612	0.748656	0.806982	0.900585	0.677885	0.648045	0.691406	0.725694	0.765705	0.747892	0.921642	0.841296	0.740302	0	0.668687	0.719268	0.898618	0.875969	0.950893	0.30622	0.591753	0.265092	0.385417	0.492723	0.833333	0.744681	0.966321
88	0.940299	0.751412	0.961089	0.751852	0.694737	0.585434	0.746725	0.976526	0.75	0.748971	0.911917	0.970954	0.661172	0.683776	0.598419	0.613543	0.674506	0.599838	0.6452	0.739189	0.58392	0.671429	0.687055	0.747312	0.802875	0.897661	0.677885	0.642458	0.691406	0.753472	0.764007	0.844857	0.9199	0.841376	0.797724	0	0.66728	0.719268	0.898618	0.868217	0.950893	0.301435	0.591753	0.265092	0.385417	0.465696	0.851852	0.744681	0.958549
89	0.940299	0.754237	0.961089	0.751852	0.694737	0.579832	0.746725	0.971831	0.75	0.748971	0.911917	0.970954	0.663004	0.687443	0.602372	0.605285	0.682032	0.608731	0.64277	0.739189	0.603015	0.697143	0.685633	0.75	0.798768	0.897661	0.677885	0.659218	0.71875	0.763889	0.767402	0.856661	0.921891	0.837713	0.743128	0	0.674532	0.719268	0.895238	0.868217	0.950893	0.296651	0.591753	0.262467	0.385417	0.432432	0.851852	0.765957	0.958549
90	0.940299	0.751412	0.961089	0.751852	0.694737	0.579832	0.746725	0.971831	0.75	0.748971	0.911917	0.970954	0.663004	0.687443	0.603953	0.611065	0.682032	0.609539	0.6452	0.752027	0.611558	0.707143	0.693457	0.748656	0.802875	0.900585	0.677885	0.653631	0.71875	0.791667	0.747029	0.870995	0.922886	0.83835	0.786881	0	0.675073	0.719268	0.898618	0.868217	0.950893	0.301435	0.591753	0.262467	0.385417	0.372141	0.87037	0.765957	0.96114
91	0.936567	0.751412	0.961089	0.748148	0.691228	0.577031	0.737991	0.967136	0.75	0.740741	0.911917	0.970954	0.659341	0.683776	0.598419	0.604459	0.684854	0.60388	0.648846	0.761486	0.616583	0.715	0.690612	0.744624	0.802875	0.900585	0.673077	0.648045	0.679688	0.722222	0.748727	0.920742	0.924627	0.847189	0.771075	0	0.673774	0.719268	0.895238	0.860465	0.950893	0.299043	0.591753	0.262467	0.385417	0.4158	0.87037	0.765957	0.96114
92	0.932836	0.748588	0.953307	0.740741	0.684211	0.57423	0.737991	0.957746	0.742537	0.736626	0.901554	0.966805	0.661172	0.683776	0.596047	0.601982	0.67921	0.602264	0.651883	0.759459	0.617588	0.709286	0.694168	0.743952	0.815195	0.903509	0.663462	0.653631	0.671875	0.788194	0.758913	0.897133	0.928607	0.848543	0.777337	0	0.672367	0.719268	0.88848	0.844961	0.950893	0.296651	0.591753	0.262467	0.385417	0.488565	0.87037	0.765957	0.968912
93	0.929104	0.748588	0.953307	0.740741	0.680702	0.57423	0.733624	0.957746	0.742537	0.736626	0.901554	0.966805	0.659341	0.683776	0.595257	0.604459	0.672625	0.601455	0.651883	0.760135	0.615578	0.705714	0.697013	0.74328	0.815195	0.906433	0.663462	0.653631	0.695312	0.78125	0.797963	0.911467	0.927861	0.850215	0.770693	0	0.672475	0.719268	0.88848	0.844961	0.950893	0.303828	0.591753	0.262467	0.385417	0.47817	0.888889	0.765957	0.971503
94	0.925373	0.742938	0.949416	0.737037	0.677193	0.57423	0.724891	0.953052	0.738806	0.73251	0.896373	0.962656	0.666667	0.687443	0.597628	0.608588	0.675447	0.602264	0.656136	0.760135	0.622613	0.704286	0.705548	0.75336	0.819302	0.915205	0.658654	0.664804	0.691406	0.722222	0.789474	0.91231	0.929353	0.853719	0.758247	0	0.670419	0.719268	0.88848	0.844961	0.950893	0.301435	0.591753	0.262467	0.385417	0.422037	0.87037	0.744681	0.96114
95	0.921642	0.740113	0.945525	0.733333	0.677193	0.57423	0.724891	0.953052	0.735075	0.73251	0.896373	0.962656	0.666667	0.692942	0.599209	0.605285	0.678269	0.605497	0.656136	0.761486	0.630653	0.709286	0.708393	0.758737	0.819302	0.921053	0.653846	0.659218	0.679688	0.71875	0.782683	0.919056	0.929851	0.852763	0.758018	0	0.669661	0.719268	0.88848	0.837209	0.950893	0.294258	0.591753	0.262467	0.385417	0.434511	0.87037	0.744681	0.979275
96	0.91791	0.737288	0.945525	0.733333	0.677193	0.57423	0.724891	0.953052	0.731343	0.73251	0.896373	0.962656	0.666667	0.691109	0.603953	0.609414	0.691439	0.612773	0.656136	0.764189	0.628643	0.709286	0.708393	0.764785	0.815195	0.912281	0.653846	0.653631	0.679688	0.71875	0.780985	0.783305	0.9301	0.8577	0.806964	0	0.668471	0.719268	0.881721	0.837209	0.950893	0.296651	0.591753	0.262467	0.385417	0.37422	0.87037	0.744681	0.979275
97	0.914179	0.734463	0.859922	0.885185	0.677193	0.571429	0.720524	0.948357	0.731343	0.73251	0.896373	0.958506	0.668498	0.696609	0.605534	0.607762	0.694262	0.61439	0.63548	0.75473	0.622613	0.701429	0.699858	0.75336	0.798768	0.900585	0.653846	0.664804	0.722656	0.722222	0.767402	0.682968	0.931343	0.848463	0.732208	0	0.670852	0.647445	0.881721	0.837209	0.950893	0.299043	0.340206	0.262467	0.385417	0.540541	0.851852	0.744681	0.963731
98	0.914179	0.737288	0.856031	0.885185	0.677193	0.571429	0.724891	0.943662	0.735075	0.73251	0.896373	0.958506	0.664835	0.690192	0.606324	0.607762	0.70461	0.612773	0.63791	0.74527	0.611055	0.685714	0.6899	0.736559	0.798768	0.894737	0.653846	0.659218	0.695312	0.75	0.757216	0.763069	0.931095	0.845437	0.738852	0	0.668471	0.647445	0.881721	0.837209	0.950893	0.299043	0.338144	0.262467	0.385417	0.586279	0.851852	0.744681	0.958549
99	0.914179	0.737288	0.859922	0.885185	0.677193	0.571429	0.724891	0.943662	0.738806	0.73251	0.896373	0.958506	0.675824	0.696609	0.612648	0.611065	0.701787	0.616815	0.64034	0.75473	0.61608	0.703571	0.702703	0.761425	0.811088	0.900585	0.653846	0.659218	0.6875	0.697917	0.767402	0.904722	0.938806	0.84918	0.729154	0	0.670202	0.647445	0.878341	0.821705	0.950893	0.311005	0.342268	0.262467	0.385417	0.532225	0.888889	0.744681	0.963731
100	0.910448	0.79096	0.856031	0.881481	0.670175	0.565826	0.720524	0.934272	0.731343	0.728395	0.896373	0.958506	0.666667	0.698442	0.611067	0.612717	0.69238	0.61439	0.636695	0.760135	0.611558	0.718571	0.70128	0.740591	0.815195	0.906433	0.653846	0.648045	0.691406	0.739583	0.7691	0.784148	0.940299	0.852922	0.729918	0	0.670635	0.647445	0.871583	0.806202	0.950893	0.301435	0.346392	0.262467	0.385417	0.553015	0.888889	0.744681	0.968912
101	0.902985	0.728814	0.848249	0.874074	0.663158	0.563025	0.707424	0.929577	0.723881	0.720165	0.875648	0.958506	0.675824	0.696609	0.607905	0.612717	0.691439	0.613581	0.63791	0.74527	0.614573	0.698571	0.70128	0.75336	0.815195	0.912281	0.639423	0.653631	0.671875	0.753472	0.765705	0.826307	0.940796	0.856904	0.745953	0	0.669012	0.647445	0.864824	0.79845	0.950893	0.299043	0.346392	0.262467	0.385417	0.573805	0.888889	0.744681	0.976684
102	0.899254	0.725989	0.844358	0.87037	0.659649	0.560224	0.703057	0.929577	0.723881	0.720165	0.875648	0.950207	0.673993	0.694775	0.605534	0.615194	0.695202	0.616815	0.645808	0.748649	0.610553	0.686429	0.692745	0.752016	0.815195	0.909357	0.634615	0.664804	0.691406	0.784722	0.779287	0.890388	0.940547	0.856347	0.736484	0	0.670744	0.647445	0.861444	0.79845	0.950893	0.301435	0.340206	0.262467	0.385417	0.536383	0.888889	0.744681	0.974093
103	0.899254	0.725989	0.844358	0.87037	0.659649	0.557423	0.703057	0.929577	0.720149	0.720165	0.875648	0.950207	0.673993	0.700275	0.603162	0.614368	0.69238	0.616006	0.648846	0.749324	0.619095	0.688571	0.699147	0.750672	0.815195	0.915205	0.634615	0.653631	0.695312	0.767361	0.767402	0.895447	0.935323	0.850534	0.724343	0	0.671718	0.647445	0.864824	0.813953	0.950893	0.301435	0.342268	0.262467	0.385417	0.459459	0.888889	0.744681	0.974093
104	0.899254	0.731638	0.848249	0.877778	0.663158	0.557423	0.707424	0.929577	0.723881	0.72428	0.88601	0.950207	0.668498	0.709441	0.604743	0.617671	0.694262	0.612773	0.650061	0.753378	0.624121	0.7	0.708393	0.75672	0.823409	0.915205	0.644231	0.667598	0.667969	0.739583	0.777589	0.830523	0.933333	0.851091	0.733659	0	0.668471	0.647445	0.868203	0.829457	0.950893	0.291866	0.340206	0.262467	0.385417	0.567568	0.888889	0.744681	0.984456
105	0.899254	0.737288	0.859922	0.885185	0.673684	0.565826	0.720524	0.938967	0.735075	0.740741	0.901554	0.958506	0.661172	0.702108	0.595257	0.609414	0.677328	0.606306	0.634872	0.743919	0.594472	0.705714	0.687055	0.745296	0.806982	0.900585	0.653846	0.681564	0.742188	0.725694	0.777589	0.768128	0.925124	0.850534	0.724343	0	0.670419	0.647445	0.878341	0.868217	0.950893	0.301435	0.342268	0.262467	0.385417	0.571726	0.87037	0.744681	0.971503
106	0.910448	0.742938	0.863813	0.888889	0.680702	0.571429	0.724891	0.943662	0.738806	0.744856	0.906736	0.966805	0.657509	0.700275	0.598419	0.609414	0.677328	0.605497	0.659174	0.745946	0.595477	0.675714	0.677098	0.743952	0.811088	0.900585	0.658654	0.681564	0.730469	0.743056	0.772496	0.771501	0.924129	0.842252	0.727856	0	0.667713	0.647445	0.878341	0.891473	0.950893	0.299043	0.309278	0.262467	0.385417	0.530146	0.851852	0.744681	0.971503
107	0.914179	0.745763	0.871595	0.896296	0.684211	0.57423	0.733624	0.948357	0.746269	0.753086	0.917098	0.970954	0.661172	0.700275	0.596838	0.601982	0.686736	0.608731	0.6452	0.741892	0.588945	0.696429	0.678521	0.739919	0.806982	0.900585	0.663462	0.653631	0.699219	0.774306	0.775891	0.752108	0.921891	0.843208	0.70617	0	0.668038	0.647445	0.891859	0.899225	0.950893	0.291866	0.352577	0.262467	0.385417	0.636175	0.851852	0.744681	0.968912
108	0.921642	0.748588	0.875486	0.9	0.691228	0.579832	0.737991	0.953052	0.75	0.761317	0.927461	0.970954	0.655678	0.696609	0.598419	0.609414	0.676388	0.605497	0.663426	0.739865	0.59397	0.688571	0.682788	0.737903	0.811088	0.900585	0.673077	0.653631	0.707031	0.805556	0.782683	0.821248	0.9199	0.834209	0.746411	0	0.668687	0.647445	0.891859	0.899225	0.950893	0.277512	0.34433	0.262467	0.385417	0.650728	0.833333	0.765957	0.966321
109	0.925373	0.748588	0.883268	0.907407	0.698246	0.582633	0.742358	0.962441	0.753731	0.765432	0.932642	0.975104	0.648352	0.694775	0.599209	0.605285	0.670743	0.600647	0.664642	0.735135	0.59196	0.685714	0.681366	0.735887	0.811088	0.900585	0.677885	0.648045	0.695312	0.743056	0.78438	0.820405	0.918905	0.833015	0.735644	0	0.668579	0.647445	0.895238	0.914729	0.950893	0.284689	0.340206	0.262467	0.385417	0.571726	0.833333	0.765957	0.963731
110	0.932836	0.754237	0.88716	0.914815	0.701754	0.585434	0.746725	0.967136	0.757463	0.769547	0.937824	0.979253	0.650183	0.696609	0.598419	0.604459	0.670743	0.60388	0.664642	0.735811	0.592965	0.682857	0.681366	0.735215	0.811088	0.900585	0.682692	0.636872	0.671875	0.763889	0.755518	0.859191	0.91592	0.834846	0.724954	0	0.666739	0.647445	0.898618	0.906977	0.950893	0.294258	0.342268	0.262467	0.385417	0.575884	0.833333	0.744681	0.966321
111	0.940299	0.757062	0.891051	0.914815	0.705263	0.585434	0.751092	0.967136	0.757463	0.773663	0.943005	0.979253	0.652015	0.692942	0.593676	0.601156	0.674506	0.601455	0.643985	0.735811	0.590955	0.687857	0.677809	0.730511	0.811088	0.900585	0.6875	0.648045	0.679688	0.798611	0.792869	0.827993	0.919652	0.830626	0.730376	0	0.668362	0.647445	0.901997	0.891473	0.950893	0.291866	0.336082	0.262467	0.385417	0.619543	0.833333	0.744681	0.966321
112	0.94403	0.757062	0.894942	0.918519	0.708772	0.591036	0.755459	0.971831	0.761194	0.777778	0.943005	0.983402	0.64652	0.692942	0.593676	0.601156	0.665099	0.598222	0.63791	0.731757	0.588442	0.69	0.674964	0.727823	0.811088	0.909357	0.6875	0.642458	0.671875	0.753472	0.774194	0.793423	0.918159	0.835802	0.725183	0	0.669445	0.647445	0.901997	0.868217	0.950893	0.287081	0.338144	0.262467	0.385417	0.650728	0.833333	0.765957	0.974093
113	0.947761	0.757062	0.894942	0.922222	0.712281	0.591036	0.755459	0.971831	0.761194	0.777778	0.943005	0.987552	0.657509	0.694775	0.594466	0.601982	0.671684	0.607922	0.637303	0.743243	0.617085	0.695	0.687055	0.727151	0.815195	0.918129	0.6875	0.648045	0.679688	0.760417	0.770798	0.904722	0.916418	0.830785	0.712126	0	0.665332	0.647445	0.901997	0.860465	0.950893	0.289474	0.342268	0.246719	0.375	0.407484	0.833333	0.765957	0.971503
114	0.947761	0.754237	0.894942	0.922222	0.712281	0.593838	0.755459	0.971831	0.761194	0.777778	0.943005	0.987552	0.657509	0.694775	0.596838	0.606111	0.670743	0.605497	0.643985	0.749324	0.61809	0.702857	0.694879	0.737903	0.815195	0.906433	0.6875	0.636872	0.664062	0.777778	0.772496	0.89882	0.915672	0.831183	0.719075	0	0.665007	0.647445	0.898618	0.844961	0.950893	0.303828	0.34433	0.254593	0.375	0.37422	0.851852	0.765957	0.974093
115	0.947761	0.754237	0.894942	0.922222	0.712281	0.593838	0.755459	0.971831	0.757463	0.777778	0.943005	0.987552	0.659341	0.692942	0.592885	0.601156	0.677328	0.608731	0.6452	0.753378	0.612563	0.699286	0.69559	0.741935	0.815195	0.906433	0.6875	0.642458	0.652344	0.770833	0.747029	0.796796	0.918159	0.83405	0.72671	0	0.664249	0.647445	0.898618	0.844961	0.950893	0.291866	0.346392	0.246719	0.375	0.43659	0.851852	0.765957	0.974093
116	0.947761	0.751412	0.891051	0.922222	0.708772	0.593838	0.751092	0.971831	0.753731	0.773663	0.943005	0.983402	0.661172	0.694775	0.592095	0.604459	0.675447	0.607922	0.650668	0.753378	0.611558	0.695	0.694168	0.742608	0.815195	0.903509	0.682692	0.648045	0.667969	0.743056	0.741935	0.781619	0.918408	0.833731	0.744044	0	0.666089	0.647445	0.895238	0.837209	0.950893	0.296651	0.354639	0.259843	0.375	0.426195	0.851852	0.765957	0.976684
117	0.947761	0.751412	0.891051	0.918519	0.705263	0.591036	0.751092	0.967136	0.75	0.769547	0.937824	0.983402	0.661172	0.694775	0.593676	0.601156	0.67921	0.605497	0.636087	0.753378	0.61407	0.691429	0.692034	0.742608	0.815195	0.903509	0.677885	0.642458	0.660156	0.729167	0.740238	0.761383	0.920149	0.833731	0.743891	0	0.665656	0.647445	0.895238	0.837209	0.950893	0.291866	0.34433	0.246719	0.375	0.459459	0.851852	0.765957	0.974093
118	0.947761	0.751412	0.88716	0.914815	0.705263	0.591036	0.746725	0.962441	0.75	0.769547	0.932642	0.983402	0.664835	0.696609	0.6	0.601982	0.688617	0.608731	0.657959	0.762838	0.626131	0.7	0.704125	0.741935	0.823409	0.912281	0.677885	0.642458	0.648438	0.760417	0.760611	0.801012	0.918657	0.833731	0.753283	0	0.665007	0.647445	0.891859	0.829457	0.950893	0.301435	0.342268	0.249344	0.375	0.438669	0.851852	0.765957	0.974093
119	0.94403	0.748588	0.88716	0.914815	0.705263	0.591036	0.746725	0.962441	0.75	0.769547	0.932642	0.983402	0.67033	0.700275	0.603162	0.604459	0.69238	0.607922	0.647631	0.764865	0.624623	0.71	0.704836	0.747984	0.827515	0.918129	0.677885	0.636872	0.648438	0.798611	0.811545	0.782462	0.924378	0.84703	0.765043	0	0.666306	0.647445	0.895238	0.813953	0.950893	0.296651	0.340206	0.259843	0.385417	0.446985	0.87037	0.765957	0.981865
120	0.94403	0.742938	0.879377	0.911111	0.701754	0.585434	0.742358	0.957746	0.742537	0.761317	0.92228	0.979253	0.672161	0.703941	0.604743	0.608588	0.691439	0.620857	0.652491	0.766216	0.614573	0.721429	0.715505	0.768145	0.819302	0.909357	0.668269	0.636872	0.644531	0.722222	0.833616	0.745363	0.924876	0.848941	0.827581	0	0.669661	0.647445	0.891859	0.813953	0.950893	0.299043	0.346392	0.259843	0.385417	0.282744	0.87037	0.765957	0.979275
121	0.932836	0.734463	0.871595	0.903704	0.694737	0.579832	0.729258	0.948357	0.735075	0.748971	0.911917	0.970954	0.677656	0.71494	0.606324	0.620149	0.688617	0.620857	0.653098	0.752027	0.624121	0.716429	0.719772	0.762769	0.811088	0.903509	0.663462	0.625698	0.628906	0.732639	0.837012	0.772344	0.925373	0.849737	0.830406	0	0.668038	0.719268	0.88848	0.806202	0.950893	0.291866	0.334021	0.265092	0.385417	0.382536	0.87037	0.765957	0.974093
122	0.932836	0.734463	0.871595	0.9	0.694737	0.577031	0.729258	0.948357	0.731343	0.753086	0.896373	0.970954	0.681319	0.716774	0.604743	0.622626	0.688617	0.624091	0.652491	0.769595	0.625126	0.705714	0.723329	0.762769	0.823409	0.912281	0.663462	0.625698	0.628906	0.795139	0.843803	0.769815	0.927114	0.851409	0.81544	0	0.669878	0.719268	0.881721	0.813953	0.950893	0.291866	0.34433	0.265092	0.385417	0.384615	0.87037	0.765957	0.976684
123	0.929104	0.706215	0.871595	0.903704	0.694737	0.577031	0.729258	0.948357	0.731343	0.753086	0.911917	0.970954	0.68315	0.716774	0.606324	0.624277	0.697084	0.626516	0.651276	0.760135	0.624121	0.707143	0.719061	0.764113	0.831622	0.910819	0.663462	0.625698	0.613281	0.847222	0.842105	0.747892	0.925871	0.850454	0.828803	0	0.670852	0.719268	0.881721	0.806202	0.950893	0.301435	0.34433	0.265092	0.385417	0.422037	0.87037	0.765957	0.984456
124	0.925373	0.734463	0.867704	0.9	0.694737	0.57423	0.724891	0.943662	0.731343	0.748971	0.943005	0.966805	0.668498	0.707608	0.602372	0.61602	0.694262	0.618432	0.654313	0.760135	0.624121	0.714286	0.715505	0.764785	0.827515	0.912281	0.663462	0.642458	0.65625	0.763889	0.828523	0.797639	0.930348	0.850534	0.801619	0	0.667496	0.719268	0.871583	0.806202	0.950893	0.538278	0.356701	0.265092	0.385417	0.39501	0.888889	0.765957	0.992228
125	0.925373	0.731638	0.867704	0.896296	0.691228	0.57423	0.724891	0.943662	0.727612	0.748971	0.906736	0.970954	0.672161	0.698442	0.603162	0.611065	0.697084	0.615198	0.656136	0.758784	0.621608	0.724286	0.715505	0.764785	0.815195	0.891813	0.658654	0.636872	0.640625	0.795139	0.831919	0.751265	0.926866	0.849419	0.816814	0	0.664682	0.719268	0.871583	0.821705	0.950893	0.303828	0.303093	0.265092	0.385417	0.446985	0.851852	0.744681	0.984456
126	0.925373	0.731638	0.871595	0.9	0.694737	0.57423	0.724891	0.943662	0.731343	0.748971	0.911917	0.966805	0.664835	0.694775	0.592095	0.606111	0.69238	0.609539	0.650061	0.760135	0.613568	0.725714	0.715505	0.764785	0.811088	0.891813	0.663462	0.642458	0.652344	0.760417	0.835314	0.774874	0.926866	0.84918	0.814676	0	0.667388	0.719268	0.871583	0.837209	0.950893	0.294258	0.354639	0.265092	0.385417	0.390852	0.851852	0.744681	0.971503
127	0.921642	0.728814	0.867704	0.896296	0.691228	0.571429	0.716157	0.943662	0.727612	0.744856	0.906736	0.966805	0.659341	0.702108	0.601581	0.598679	0.685795	0.612773	0.650668	0.760135	0.61407	0.718571	0.715505	0.770161	0.815195	0.894737	0.653846	0.625698	0.628906	0.75	0.831919	0.793423	0.935323	0.858178	0.820938	0	0.667929	0.719268	0.854686	0.829457	0.950893	0.299043	0.348454	0.265092	0.385417	0.388773	0.87037	0.744681	0.971503
128	0.91791	0.728814	0.863813	0.896296	0.687719	0.571429	0.71179	0.938967	0.723881	0.740741	0.906736	0.966805	0.657509	0.700275	0.600791	0.611065	0.684854	0.61439	0.650668	0.0891892	0.621106	0.712857	0.707681	0.770833	0.819302	0.903509	0.653846	0.631285	0.625	0.788194	0.820034	0.838954	0.932836	0.865106	0.820785	0	0.667172	0.719268	0.854686	0.829457	0.950893	0.373206	0.34433	0.265092	0.385417	0.355509	0.851852	0.744681	0.974093
129	0.921642	0.728814	0.867704	0.896296	0.687719	0.571429	0.716157	0.943662	0.727612	0.748971	0.911917	0.970954	0.653846	0.694775	0.594466	0.61602	0.67921	0.611156	0.6452	0.758784	0.623116	0.702857	0.707681	0.770161	0.823409	0.903509	0.653846	0.636872	0.613281	0.774306	0.828523	0.764755	0.924876	0.85125	0.829184	0	0.664899	0.719268	0.861444	0.844961	0.950893	0.291866	0.342268	0.262467	0.385417	0.35343	0.851852	0.744681	0.974093
130	0.929104	0.734463	0.875486	0.892593	0.698246	0.577031	0.724891	0.948357	0.735075	0.753086	0.927461	0.975104	0.659341	0.690192	0.592095	0.612717	0.675447	0.617623	0.662211	0.751351	0.625126	0.697857	0.708393	0.771505	0.831622	0.912281	0.668269	0.631285	0.625	0.850694	0.831919	0.889545	0.912438	0.845995	0.81628	0	0.665332	0.719268	0.868203	0.868217	0.950893	0.289474	0.340206	0.262467	0.385417	0.363825	0.851852	0.765957	0.987047
131	0.940299	0.740113	0.883268	0.907407	0.705263	0.582633	0.737991	0.957746	0.742537	0.773663	0.937824	0.983402	0.657509	0.690192	0.590514	0.602808	0.674506	0.609539	0.662211	0.75473	0.623618	0.693571	0.704836	0.772177	0.831622	0.915205	0.677885	0.642458	0.621094	0.791667	0.831919	0.907251	0.916418	0.845437	0.827276	0	0.665981	0.719268	0.871583	0.875969	0.950893	0.299043	0.338144	0.249344	0.385417	0.384615	0.851852	0.765957	0.989637
132	0.94403	0.742938	0.891051	0.914815	0.708772	0.585434	0.742358	0.967136	0.746269	0.777778	0.943005	0.987552	0.654762	0.689276	0.588933	0.598679	0.672625	0.606306	0.657959	0.764189	0.619598	0.729286	0.720484	0.766801	0.821355	0.910819	0.682692	0.611732	0.613281	0.753472	0.831919	0.904722	0.908209	0.838589	0.820785	0	0.664249	0.719268	0.874962	0.875969	0.950893	0.289474	0.342268	0.251969	0.385417	0.280665	0.833333	0.765957	0.984456
133	0.951493	0.748588	0.898833	0.918519	0.719298	0.593838	0.751092	0.971831	0.753731	0.790123	0.953368	0.991701	0.652015	0.68561	0.587352	0.599505	0.670743	0.605497	0.663426	0.74527	0.626633	0.707143	0.703414	0.757392	0.815195	0.906433	0.692308	0.608939	0.597656	0.836806	0.831919	0.91484	0.912687	0.839067	0.790012	0	0.675831	0.719268	0.878341	0.868217	0.950893	0.291866	0.348454	0.270341	0.385417	0.309771	0.814815	0.765957	0.979275
134	0.955224	0.751412	0.902724	0.925926	0.726316	0.596639	0.755459	0.976526	0.757463	0.794239	0.958549	0.995851	0.648352	0.68561	0.587352	0.598679	0.668862	0.607114	0.656744	0.739865	0.624623	0.705	0.647937	0.752016	0.811088	0.900585	0.697115	0.603352	0.601562	0.850694	0.828523	0.919899	0.913433	0.841456	0.795357	0	0.676047	0.719268	0.871583	0.860465	0.950893	0.301435	0.305155	0.262467	0.385417	0.251559	0.851852	0.808511	0.971503
135	0.958955	0.751412	0.902724	0.92963	0.726316	0.59944	0.751092	0.976526	0.757463	0.794239	0.958549	0.995851	0.64652	0.683776	0.585771	0.601982	0.668862	0.607114	0.659781	0.751351	0.625628	0.713571	0.711238	0.748656	0.811088	0.900585	0.692308	0.614525	0.609375	0.71875	0.831919	0.91231	0.910945	0.837554	0.803222	0	0.674748	0.719268	0.871583	0.852713	0.950893	0.296651	0.360825	0.272966	0.385417	0.245322	0.851852	0.808511	0.966321
136	0.958955	0.754237	0.902724	0.933333	0.726316	0.59944	0.751092	0.976526	0.757463	0.790123	0.958549	0.995851	0.651099	0.68561	0.587352	0.601156	0.661336	0.605497	0.662819	0.760811	0.627638	0.723571	0.71835	0.747312	0.815195	0.909357	0.697115	0.625698	0.625	0.822917	0.821732	0.93339	0.910448	0.838987	0.78963	0	0.673125	0.719268	0.874962	0.860465	0.950893	0.289474	0.348454	0.259843	0.385417	0.222453	0.851852	0.808511	0.971503
137	0.962687	0.754237	0.906615	0.933333	0.729825	0.59944	0.755459	0.981221	0.761194	0.794239	0.963731	1	0.653846	0.681943	0.585771	0.597853	0.672625	0.602264	0.668287	0.757432	0.607035	0.732143	0.721195	0.741263	0.815195	0.894737	0.701923	0.636872	0.648438	0.850694	0.837012	0.834739	0.909701	0.837633	0.811087	0	0.673882	0.719268	0.871583	0.860465	0.950893	0.30622	0.294845	0.259843	0.385417	0.33264	0.851852	0.808511	0.974093
138	0.962687	0.757062	0.910506	0.933333	0.729825	0.602241	0.755459	0.985915	0.761194	0.794239	0.963731	1	0.655678	0.683776	0.583399	0.59455	0.675447	0.599838	0.671324	0.75473	0.611558	0.69	0.707681	0.737231	0.819302	0.897661	0.701923	0.592179	0.613281	0.909722	0.848896	0.813659	0.909701	0.839943	0.807651	0	0.672367	0.719268	0.864824	0.844961	0.950893	0.301435	0.334021	0.259843	0.385417	0.471933	0.851852	0.808511	0.971503
139	0.962687	0.759887	0.906615	0.933333	0.729825	0.59944	0.755459	0.981221	0.761194	0.794239	0.963731	0.995851	0.655678	0.692942	0.58498	0.595376	0.67921	0.60388	0.673147	0.753378	0.606533	0.696429	0.704125	0.731183	0.823409	0.903509	0.701923	0.586592	0.605469	0.902778	0.83871	0.844857	0.911692	0.83198	0.804291	0	0.67345	0.719268	0.858065	0.837209	0.950893	0.301435	0.348454	0.259843	0.385417	0.430353	0.851852	0.808511	0.974093
140	0.958955	0.757062	0.906615	0.933333	0.729825	0.59944	0.751092	0.981221	0.757463	0.790123	0.958549	0.995851	0.655678	0.691109	0.592095	0.601156	0.686736	0.607114	0.681652	0.753378	0.607035	0.712857	0.70697	0.729167	0.819302	0.909357	0.697115	0.586592	0.59375	0.833333	0.840407	0.817875	0.91194	0.839783	0.830254	0	0.673233	0.719268	0.851306	0.821705	0.950893	0.303828	0.298969	0.259843	0.385417	0.403326	0.87037	0.808511	0.979275
141	0.955224	0.754237	0.902724	0.933333	0.726316	0.596639	0.742358	0.971831	0.753731	0.790123	0.958549	0.991701	0.652015	0.691109	0.592885	0.599505	0.677328	0.606306	0.681652	0.752027	0.607035	0.72	0.705548	0.725806	0.819302	0.912281	0.692308	0.575419	0.578125	0.861111	0.837012	0.77403	0.915672	0.840978	0.78879	0	0.675722	0.719268	0.841168	0.79845	0.950893	0.311005	0.350515	0.259843	0.385417	0.463617	0.87037	0.808511	0.976684
142	0.951493	0.748588	0.894942	0.925926	0.722807	0.593838	0.746725	0.971831	0.75	0.781893	0.953368	0.987552	0.655678	0.687443	0.591304	0.597853	0.669802	0.604689	0.678615	0.758784	0.603518	0.724286	0.704836	0.727151	0.815195	0.915205	0.6875	0.586592	0.589844	1	0.828523	0.766442	0.917413	0.843685	0.792456	0	0.676805	0.719268	0.837789	0.790698	0.950893	0.308612	0.352577	0.259843	0.385417	0.403326	0.87037	0.808511	0.974093
143	0.947761	0.745763	0.891051	0.922222	0.719298	0.591036	0.737991	0.967136	0.746269	0.777778	0.948187	0.983402	0.655678	0.691109	0.591304	0.595376	0.670743	0.604689	0.643378	0.762838	0.607538	0.731429	0.709815	0.727823	0.815195	0.912281	0.682692	0.592179	0.609375	0.784722	0.842105	0.731029	0.920647	0.844402	0.849191	0	0.674099	0.719268	0.837789	0.782946	0.950893	0.301435	0.346392	0.259843	0.385417	0.453222	0.87037	0.808511	0.974093
144	0.94403	0.742938	0.88716	0.922222	0.719298	0.588235	0.515284	0.962441	0.738806	0.773663	0.994819	0.983402	0.659341	0.68561	0.577075	0.595376	0.67921	0.611156	0.655529	0.766216	0.612563	0.732143	0.709815	0.723118	0.811088	0.915205	0.677885	0.581006	0.605469	0.774306	0.840407	0.743676	0.9199	0.847906	0.780467	0	0.674099	0.719268	0.837789	0.775194	0.950893	0.301435	0.346392	0.259843	0.385417	0.438669	0.87037	0.787234	0.968912
145	0.932836	0.734463	0.871595	0.903704	0.694737	0.579832	0.729258	0.948357	0.735075	0.748971	0.911917	0.970954	0.677656	0.71494	0.606324	0.620149	0.688617	0.620857	0.653098	0.752027	0.624121	0.716429	0.719772	0.762769	0.811088	0.903509	0.663462	0.625698	0.628906	0.732639	0.837012	0.772344	0.925373	0.849737	0.830406	0	0.668038	0.719268	0.88848	0.806202	0.950893	0.291866	0.334021	0.265092	0.385417	0.382536	0.87037	0.765957	0.974093
146	0.932836	0.734463	0.871595	0.9	0.694737	0.577031	0.729258	0.948357	0.731343	0.753086	0.896373	0.970954	0.681319	0.716774	0.604743	0.622626	0.688617	0.624091	0.652491	0.769595	0.625126	0.705714	0.723329	0.762769	0.823409	0.912281	0.663462	0.625698	0.628906	0.795139	0.843803	0.769815	0.927114	0.851409	0.81544	0	0.669878	0.719268	0.881721	0.813953	0.950893	0.291866	0.34433	0.265092	0.385417	0.384615	0.87037	0.765957	0.976684
147	0.929104	0.706215	0.871595	0.903704	0.694737	0.577031	0.729258	0.948357	0.731343	0.753086	0.911917	0.970954	0.68315	0.716774	0.606324	0.624277	0.697084	0.626516	0.651276	0.760135	0.624121	0.707143	0.719061	0.764113	0.831622	0.910819	0.663462	0.625698	0.613281	0.847222	0.842105	0.747892	0.925871	0.850454	0.828803	0	0.670852	0.719268	0.881721	0.806202	0.950893	0.301435	0.34433	0.265092	0.385417	0.422037	0.87037	0.765957	0.984456
148	0.925373	0.734463	0.867704	0.9	0.694737	0.57423	0.724891	0.943662	0.731343	0.748971	0.943005	0.966805	0.668498	0.707608	0.602372	0.61602	0.694262	0.618432	0.654313	0.760135	0.624121	0.714286	0.715505	0.764785	0.827515	0.912281	0.663462	0.642458	0.65625	0.763889	0.828523	0.797639	0.930348	0.850534	0.801619	0	0.667496	0.719268	0.871583	0.806202	0.950893	0.538278	0.356701	0.265092	0.385417	0.39501	0.888889	0.765957	0.992228
149	0.925373	0.731638	0.867704	0.896296	0.691228	0.57423	0.724891	0.943662	0.727612	0.748971	0.906736	0.970954	0.672161	0.698442	0.603162	0.611065	0.697084	0.615198	0.656136	0.758784	0.621608	0.724286	0.715505	0.764785	0.815195	0.891813	0.658654	0.636872	0.640625	0.795139	0.831919	0.751265	0.926866	0.849419	0.816814	0	0.664682	0.719268	0.871583	0.821705	0.950893	0.303828	0.303093	0.265092	0.385417	0.446985	0.851852	0.744681	0.984456
150	0.925373	0.731638	0.871595	0.9	0.694737	0.57423	0.724891	0.943662	0.731343	0.748971	0.911917	0.966805	0.664835	0.694775	0.592095	0.606111	0.69238	0.609539	0.650061	0.760135	0.613568	0.725714	0.715505	0.764785	0.811088	0.891813	0.663462	0.642458	0.652344	0.760417	0.835314	0.774874	0.926866	0.84918	0.814676	0	0.667388	0.719268	0.871583	0.837209	0.950893	0.294258	0.354639	0.265092	0.385417	0.390852	0.851852	0.744681	0.971503
151	0.921642	0.728814	0.867704	0.896296	0.691228	0.571429	0.716157	0.943662	0.727612	0.744856	0.906736	0.966805	0.659341	0.702108	0.601581	0.598679	0.685795	0.612773	0.650668	0.760135	0.61407	0.718571	0.715505	0.770161	0.815195	0.894737	0.653846	0.625698	0.628906	0.75	0.831919	0.793423	0.935323	0.858178	0.820938	0	0.667929	0.719268	0.854686	0.829457	0.950893	0.299043	0.348454	0.265092	0.385417	0.388773	0.87037	0.744681	0.971503
152	0.91791	0.728814	0.863813	0.896296	0.687719	0.571429	0.71179	0.938967	0.723881	0.740741	0.906736	0.966805	0.657509	0.700275	0.600791	0.611065	0.684854	0.61439	0.650668	0.0891892	0.621106	0.712857	0.707681	0.770833	0.819302	0.903509	0.653846	0.631285	0.625	0.788194	0.820034	0.838954	0.932836	0.865106	0.820785	0	0.667172	0.719268	0.854686	0.829457	0.950893	0.373206	0.34433	0.265092	0.385417	0.355509	0.851852	0.744681	0.974093
153	0.921642	0.728814	0.867704	0.896296	0.687719	0.571429	0.716157	0.943662	0.727612	0.748971	0.911917	0.970954	0.653846	0.694775	0.594466	0.61602	0.67921	0.611156	0.6452	0.758784	0.623116	0.702857	0.707681	0.770161	0.823409	0.903509	0.653846	0.636872	0.613281	0.774306	0.828523	0.764755	0.924876	0.85125	0.829184	0	0.664899	0.719268	0.861444	0.844961	0.950893	0.291866	0.342268	0.262467	0.385417	0.35343	0.851852	0.744681	0.974093
154	0.929104	0.734463	0.875486	0.892593	0.698246	0.577031	0.724891	0.948357	0.735075	0.753086	0.927461	0.975104	0.659341	0.690192	0.592095	0.612717	0.675447	0.617623	0.662211	0.751351	0.625126	0.697857	0.708393	0.771505	0.831622	0.912281	0.668269	0.631285	0.625	0.850694	0.831919	0.889545	0.912438	0.845995	0.81628	0	0.665332	0.719268	0.868203	0.868217	0.950893	0.289474	0.340206	0.262467	0.385417	0.363825	0.851852	0.765957	0.987047
155	0.940299	0.740113	0.883268	0.907407	0.705263	0.582633	0.737991	0.957746	0.742537	0.773663	0.937824	0.983402	0.657509	0.690192	0.590514	0.602808	0.674506	0.609539	0.662211	0.75473	0.623618	0.693571	0.704836	0.772177	0.831622	0.915205	0.677885	0.642458	0.621094	0.791667	0.831919	0.907251	0.916418	0.845437	0.827276	0	0.665981	0.719268	0.871583	0.875969	0.950893	0.299043	0.338144	0.249344	0.385417	0.384615	0.851852	0.765957	0.989637
156	0.94403	0.742938	0.891051	0.914815	0.708772	0.585434	0.742358	0.967136	0.746269	0.777778	0.943005	0.987552	0.654762	0.689276	0.588933	0.598679	0.672625	0.606306	0.657959	0.764189	0.619598	0.729286	0.720484	0.766801	0.821355	0.910819	0.682692	0.611732	0.613281	0.753472	0.831919	0.904722	0.908209	0.838589	0.820785	0	0.664249	0.719268	0.874962	0.875969	0.950893	0.289474	0.342268	0.251969	0.385417	0.280665	0.833333	0.765957	0.984456
157	0.951493	0.748588	0.898833	0.918519	0.719298	0.593838	0.751092	0.971831	0.753731	0.790123	0.953368	0.991701	0.652015	0.68561	0.587352	0.599505	0.670743	0.605497	0.663426	0.74527	0.626633	0.707143	0.703414	0.757392	0.815195	0.906433	0.692308	0.608939	0.597656	0.836806	0.831919	0.91484	0.912687	0.839067	0.790012	0	0.675831	0.719268	0.878341	0.868217	0.950893	0.291866	0.348454	0.270341	0.385417	0.309771	0.814815	0.765957	0.979275
158	0.955224	0.751412	0.902724	0.925926	0.726316	0.596639	0.755459	0.976526	0.757463	0.794239	0.958549	0.995851	0.648352	0.68561	0.587352	0.598679	0.668862	0.607114	0.656744	0.739865	0.624623	0.705	0.647937	0.752016	0.811088	0.900585	0.697115	0.603352	0.601562	0.850694	0.828523	0.919899	0.913433	0.841456	0.795357	0	0.676047	0.719268	0.871583	0.860465	0.950893	0.301435	0.305155	0.262467	0.385417	0.251559	0.851852	0.808511	0.971503
159	0.958955	0.751412	0.902724	0.92963	0.726316	0.59944	0.751092	0.976526	0.757463	0.794239	0.958549	0.995851	0.64652	0.683776	0.585771	0.601982	0.668862	0.607114	0.659781	0.751351	0.625628	0.713571	0.711238	0.748656	0.811088	0.900585	0.692308	0.614525	0.609375	0.71875	0.831919	0.91231	0.910945	0.837554	0.803222	0	0.674748	0.719268	0.871583	0.852713	0.950893	0.296651	0.360825	0.272966	0.385417	0.245322	0.851852	0.808511	0.966321
160	0.958955	0.754237	0.902724	0.933333	0.726316	0.59944	0.751092	0.976526	0.757463	0.790123	0.958549	0.995851	0.651099	0.68561	0.587352	0.601156	0.661336	0.605497	0.662819	0.760811	0.627638	0.723571	0.71835	0.747312	0.815195	0.909357	0.697115	0.625698	0.625	0.822917	0.821732	0.93339	0.910448	0.838987	0.78963	0	0.673125	0.719268	0.874962	0.860465	0.950893	0.289474	0.348454	0.259843	0.385417	0.222453	0.851852	0.808511	0.971503
161	0.962687	0.754237	0.906615	0.933333	0.729825	0.59944	0.755459	0.981221	0.761194	0.794239	0.963731	1	0.653846	0.681943	0.585771	0.597853	0.672625	0.602264	0.668287	0.757432	0.607035	0.732143	0.721195	0.741263	0.815195	0.894737	0.701923	0.636872	0.648438	0.850694	0.837012	0.834739	0.909701	0.837633	0.811087	0	0.673882	0.719268	0.871583	0.860465	0.950893	0.30622	0.294845	0.259843	0.385417	0.33264	0.851852	0.808511	0.974093
162	0.962687	0.757062	0.910506	0.933333	0.729825	0.602241	0.755459	0.985915	0.761194	0.794239	0.963731	1	0.655678	0.683776	0.583399	0.59455	0.675447	0.599838	0.671324	0.75473	0.611558	0.69	0.707681	0.737231	0.819302	0.897661	0.701923	0.592179	0.613281	0.909722	0.848896	0.813659	0.909701	0.839943	0.807651	0	0.672367	0.719268	0.864824	0.844961	0.950893	0.301435	0.334021	0.259843	0.385417	0.471933	0.851852	0.808511	0.971503
163	0.962687	0.759887	0.906615	0.933333	0.729825	0.59944	0.755459	0.981221	0.761194	0.794239	0.963731	0.995851	0.655678	0.692942	0.58498	0.595376	0.67921	0.60388	0.673147	0.753378	0.606533	0.696429	0.704125	0.731183	0.823409	0.903509	0.701923	0.586592	0.605469	0.902778	0.83871	0.844857	0.911692	0.83198	0.804291	0	0.67345	0.719268	0.858065	0.837209	0.950893	0.301435	0.348454	0.259843	0.385417	0.430353	0.851852	0.808511	0.974093
164	0.958955	0.757062	0.906615	0.933333	0.729825	0.59944	0.751092	0.981221	0.757463	0.790123	0.958549	0.995851	0.655678	0.691109	0.592095	0.601156	0.686736	0.607114	0.681652	0.753378	0.607035	0.712857	0.70697	0.729167	0.819302	0.909357	0.697115	0.586592	0.59375	0.833333	0.840407	0.817875	0.91194	0.839783	0.830254	0	0.673233	0.719268	0.851306	0.821705	0.950893	0.303828	0.298969	0.259843	0.385417	0.403326	0.87037	0.808511	0.979275
165	0.955224	0.754237	0.902724	0.933333	0.726316	0.596639	0.742358	0.971831	0.753731	0.790123	0.958549	0.991701	0.652015	0.691109	0.592885	0.599505	0.677328	0.606306	0.681652	0.752027	0.607035	0.72	0.705548	0.725806	0.819302	0.912281	0.692308	0.575419	0.578125	0.861111	0.837012	0.77403	0.915672	0.840978	0.78879	0	0.675722	0.719268	0.841168	0.79845	0.950893	0.311005	0.350515	0.259843	0.385417	0.463617	0.87037	0.808511	0.976684
166	0.951493	0.748588	0.894942	0.925926	0.722807	0.593838	0.746725	0.971831	0.75	0.781893	0.953368	0.987552	0.655678	0.687443	0.591304	0.597853	0.669802	0.604689	0.678615	0.758784	0.603518	0.724286	0.704836	0.727151	0.815195	0.915205	0.6875	0.586592	0.589844	1	0.828523	0.766442	0.917413	0.843685	0.792456	0	0.676805	0.719268	0.837789	0.790698	0.950893	0.308612	0.352577	0.259843	0.385417	0.403326	0.87037	0.808511	0.974093
167	0.947761	0.745763	0.891051	0.922222	0.719298	0.591036	0.737991	0.967136	0.746269	0.777778	0.948187	0.983402	0.655678	0.691109	0.591304	0.595376	0.670743	0.604689	0.643378	0.762838	0.607538	0.731429	0.709815	0.727823	0.815195	0.912281	0.682692	0.592179	0.609375	0.784722	0.842105	0.731029	0.920647	0.844402	0.849191	0	0.674099	0.719268	0.837789	0.782946	0.950893	0.301435	0.346392	0.259843	0.385417	0.453222	0.87037	0.808511	0.974093
168	0.94403	0.742938	0.88716	0.922222	0.719298	0.588235	0.515284	0.962441	0.738806	0.773663	0.994819	0.983402	0.659341	0.68561	0.577075	0.595376	0.67921	0.611156	0.655529	0.766216	0.612563	0.732143	0.709815	0.723118	0.811088	0.915205	0.677885	0.581006	0.605469	0.774306	0.840407	0.743676	0.9199	0.847906	0.780467	0	0.674099	0.719268	0.837789	0.775194	0.950893	0.301435	0.346392	0.259843	0.385417	0.438669	0.87037	0.787234	0.968912
169	0.932836	0.734463	0.871595	0.903704	0.694737	0.579832	0.729258	0.948357	0.735075	0.748971	0.911917	0.970954	0.677656	0.71494	0.606324	0.620149	0.688617	0.620857	0.653098	0.752027	0.624121	0.716429	0.719772	0.762769	0.811088	0.903509	0.663462	0.625698	0.628906	0.732639	0.837012	0.772344	0.925373	0.849737	0.830406	0	0.668038	0.719268	0.88848	0.806202	0.950893	0.291866	0.334021	0.265092	0.385417	0.382536	0.87037	0.765957	0.974093
170	0.932836	0.734463	0.871595	0.9	0.694737	0.577031	0.729258	0.948357	0.731343	0.753086	0.896373	0.970954	0.681319	0.716774	0.604743	0.622626	0.688617	0.624091	0.652491	0.769595	0.625126	0.705714	0.723329	0.762769	0.823409	0.912281	0.663462	0.625698	0.628906	0.795139	0.843803	0.769815	0.927114	0.851409	0.81544	0	0.669878	0.719268	0.881721	0.813953	0.950893	0.291866	0.34433	0.265092	0.385417	0.384615	0.87037	0.765957	0.976684
171	0.929104	0.706215	0.871595	0.903704	0.694737	0.577031	0.729258	0.948357	0.731343	0.753086	0.911917	0.970954	0.68315	0.716774	0.606324	0.624277	0.697084	0.626516	0.651276	0.760135	0.624121	0.707143	0.719061	0.764113	0.831622	0.910819	0.663462	0.625698	0.613281	0.847222	0.842105	0.747892	0.925871	0.850454	0.828803	0	0.670852	0.719268	0.881721	0.806202	0.950893	0.301435	0.34433	0.265092	0.385417	0.422037	0.87037	0.765957	0.984456
172	0.925373	0.734463	0.867704	0.9	0.694737	0.57423	0.724891	0.943662	0.731343	0.748971	0.943005	0.966805	0.668498	0.707608	0.602372	0.61602	0.694262	0.618432	0.654313	0.760135	0.624121	0.714286	0.715505	0.764785	0.827515	0.912281	0.663462	0.642458	0.65625	0.763889	0.828523	0.797639	0.930348	0.850534	0.801619	0	0.667496	0.719268	0.871583	0.806202	0.950893	0.538278	0.356701	0.265092	0.385417	0.39501	0.888889	0.765957	0.992228
173	0.925373	0.731638	0.867704	0.896296	0.691228	0.57423	0.724891	0.943662	0.727612	0.748971	0.906736	0.970954	0.672161	0.698442	0.603162	0.611065	0.697084	0.615198	0.656136	0.758784	0.621608	0.724286	0.715505	0.764785	0.815195	0.891813	0.658654	0.636872	0.640625	0.795139	0.831919	0.751265	0.926866	0.849419	0.816814	0	0.664682	0.719268	0.871583	0.821705	0.950893	0.303828	0.303093	0.265092	0.385417	0.446985	0.851852	0.744681	0.984456
174	0.925373	0.731638	0.871595	0.9	0.694737	0.57423	0.724891	0.943662	0.731343	0.748971	0.911917	0.966805	0.664835	0.694775	0.592095	0.606111	0.69238	0.609539	0.650061	0.760135	0.613568	0.725714	0.715505	0.764785	0.811088	0.891813	0.663462	0.642458	0.652344	0.760417	0.835314	0.774874	0.926866	0.84918	0.814676	0	0.667388	0.719268	0.871583	0.837209	0.950893	0.294258	0.354639	0.265092	0.385417	0.390852	0.851852	0.744681	0.971503
175	0.921642	0.728814	0.867704	0.896296	0.691228	0.571429	0.716157	0.943662	0.727612	0.744856	0.906736	0.966805	0.659341	0.702108	0.601581	0.598679	0.685795	0.612773	0.650668	0.760135	0.61407	0.718571	0.715505	0.770161	0.815195	0.894737	0.653846	0.625698	0.628906	0.75	0.831919	0.793423	0.935323	0.858178	0.820938	0	0.667929	0.719268	0.854686	0.829457	0.950893	0.299043	0.348454	0.265092	0.385417	0.388773	0.87037	0.744681	0.971503
176	0.91791	0.728814	0.863813	0.896296	0.687719	0.571429	0.71179	0.938967	0.723881	0.740741	0.906736	0.966805	0.657509	0.700275	0.600791	0.611065	0.684854	0.61439	0.650668	0.0891892	0.621106	0.712857	0.707681	0.770833	0.819302	0.903509	0.653846	0.631285	0.625	0.788194	0.820034	0.838954	0.932836	0.865106	0.820785	0	0.667172	0.719268	0.854686	0.829457	0.950893	0.373206	0.34433	0.265092	0.385417	0.355509	0.851852	0.744681	0.974093
177	0.921642	0.728814	0.867704	0.896296	0.687719	0.571429	0.716157	0.943662	0.727612	0.748971	0.911917	0.970954	0.653846	0.694775	0.594466	0.61602	0.67921	0.611156	0.6452	0.758784	0.623116	0.702857	0.707681	0.770161	0.823409	0.903509	0.653846	0.636872	0.613281	0.774306	0.828523	0.764755	0.924876	0.85125	0.829184	0	0.664899	0.719268	0.861444	0.844961	0.950893	0.291866	0.342268	0.262467	0.385417	0.35343	0.851852	0.744681	0.974093
178	0.929104	0.734463	0.875486	0.892593	0.698246	0.577031	0.724891	0.948357	0.735075	0.753086	0.927461	0.975104	0.659341	0.690192	0.592095	0.612717	0.675447	0.617623	0.662211	0.751351	0.625126	0.697857	0.708393	0.771505	0.831622	0.912281	0.668269	0.631285	0.625	0.850694	0.831919	0.889545	0.912438	0.845995	0.81628	0	0.665332	0.719268	0.868203	0.868217	0.950893	0.289474	0.340206	0.262467	0.385417	0.363825	0.851852	0.765957	0.987047
179	0.940299	0.740113	0.883268	0.907407	0.705263	0.582633	0.737991	0.957746	0.742537	0.773663	0.937824	0.983402	0.657509	0.690192	0.590514	0.602808	0.674506	0.609539	0.662211	0.75473	0.623618	0.693571	0.704836	0.772177	0.831622	0.915205	0.677885	0.642458	0.621094	0.791667	0.831919	0.907251	0.916418	0.845437	0.827276	0	0.665981	0.719268	0.871583	0.875969	0.950893	0.299043	0.338144	0.249344	0.385417	0.384615	0.851852	0.765957	0.989637
180	0.94403	0.742938	0.891051	0.914815	0.708772	0.585434	0.742358	0.967136	0.746269	0.777778	0.943005	0.987552	0.654762	0.689276	0.588933	0.598679	0.672625	0.606306	0.657959	0.764189	0.619598	0.729286	0.720484	0.766801	0.821355	0.910819	0.682692	0.611732	0.613281	0.753472	0.831919	0.904722	0.908209	0.838589	0.820785	0	0.664249	0.719268	0.874962	0.875969	0.950893	0.289474	0.342268	0.251969	0.385417	0.280665	0.833333	0.765957	0.984456
181	0.951493	0.748588	0.898833	0.918519	0.719298	0.593838	0.751092	0.971831	0.753731	0.790123	0.953368	0.991701	0.652015	0.68561	0.587352	0.599505	0.670743	0.605497	0.663426	0.74527	0.626633	0.707143	0.703414	0.757392	0.815195	0.906433	0.692308	0.608939	0.597656	0.836806	0.831919	0.91484	0.912687	0.839067	0.790012	0	0.675831	0.719268	0.878341	0.868217	0.950893	0.291866	0.348454	0.270341	0.385417	0.309771	0.814815	0.765957	0.979275
182	0.955224	0.751412	0.902724	0.925926	0.726316	0.596639	0.755459	0.976526	0.757463	0.794239	0.958549	0.995851	0.648352	0.68561	0.587352	0.598679	0.668862	0.607114	0.656744	0.739865	0.624623	0.705	0.647937	0.752016	0.811088	0.900585	0.697115	0.603352	0.601562	0.850694	0.828523	0.919899	0.913433	0.841456	0.795357	0	0.676047	0.719268	0.871583	0.860465	0.950893	0.301435	0.305155	0.262467	0.385417	0.251559	0.851852	0.808511	0.971503
183	0.958955	0.751412	0.902724	0.92963	0.726316	0.59944	0.751092	0.976526	0.757463	0.794239	0.958549	0.995851	0.64652	0.683776	0.585771	0.601982	0.668862	0.607114	0.659781	0.751351	0.625628	0.713571	0.711238	0.748656	0.811088	0.900585	0.692308	0.614525	0.609375	0.71875	0.831919	0.91231	0.910945	0.837554	0.803222	0	0.674748	0.719268	0.871583	0.852713	0.950893	0.296651	0.360825	0.272966	0.385417	0.245322	0.851852	0.808511	0.966321
184	0.958955	0.754237	0.902724	0.933333	0.726316	0.59944	0.751092	0.976526	0.757463	0.790123	0.958549	0.995851	0.651099	0.68561	0.587352	0.601156	0.661336	0.605497	0.662819	0.760811	0.627638	0.723571	0.71835	0.747312	0.815195	0.909357	0.697115	0.625698	0.625	0.822917	0.821732	0.93339	0.910448	0.838987	0.78963	0	0.673125	0.719268	0.874962	0.860465	0.950893	0.289474	0.348454	0.259843	0.385417	0.222453	0.851852	0.808511	0.971503
185	0.962687	0.754237	0.906615	0.933333	0.729825	0.59944	0.755459	0.981221	0.761194	0.794239	0.963731	1	0.653846	0.681943	0.585771	0.597853	0.672625	0.602264	0.668287	0.757432	0.607035	0.732143	0.721195	0.741263	0.815195	0.894737	0.701923	0.636872	0.648438	0.850694	0.837012	0.834739	0.909701	0.837633	0.811087	0	0.673882	0.719268	0.871583	0.860465	0.950893	0.30622	0.294845	0.259843	0.385417	0.33264	0.851852	0.808511	0.974093
186	0.962687	0.757062	0.910506	0.933333	0.729825	0.602241	0.755459	0.985915	0.761194	0.794239	0.963731	1	0.655678	0.683776	0.583399	0.59455	0.675447	0.599838	0.671324	0.75473	0.611558	0.69	0.707681	0.737231	0.819302	0.897661	0.701923	0.592179	0.613281	0.909722	0.848896	0.813659	0.909701	0.839943	0.807651	0	0.672367	0.719268	0.864824	0.844961	0.950893	0.301435	0.334021	0.259843	0.385417	0.471933	0.851852	0.808511	0.971503
187	0.962687	0.759887	0.906615	0.933333	0.729825	0.59944	0.755459	0.981221	0.761194	0.794239	0.963731	0.995851	0.655678	0.692942	0.58498	0.595376	0.67921	0.60388	0.673147	0.753378	0.606533	0.696429	0.704125	0.731183	0.823409	0.903509	0.701923	0.586592	0.605469	0.902778	0.83871	0.844857	0.911692	0.83198	0.804291	0	0.67345	0.719268	0.858065	0.837209	0.950893	0.301435	0.348454	0.259843	0.385417	0.430353	0.851852	0.808511	0.974093
188	0.958955	0.757062	0.906615	0.933333	0.729825	0.59944	0.751092	0.981221	0.757463	0.790123	0.958549	0.995851	0.655678	0.691109	0.592095	0.601156	0.686736	0.607114	0.681652	0.753378	0.607035	0.712857	0.70697	0.729167	0.819302	0.909357	0.697115	0.586592	0.59375	0.833333	0.840407	0.817875	0.91194	0.839783	0.830254	0	0.673233	0.719268	0.851306	0.821705	0.950893	0.303828	0.298969	0.259843	0.385417	0.403326	0.87037	0.808511	0.979275
189	0.955224	0.754237	0.902724	0.933333	0.726316	0.596639	0.742358	0.971831	0.753731	0.790123	0.958549	0.991701	0.652015	0.691109	0.592885	0.599505	0.677328	0.606306	0.681652	0.752027	0.607035	0.72	0.705548	0.725806	0.819302	0.912281	0.692308	0.575419	0.578125	0.861111	0.837012	0.77403	0.915672	0.840978	0.78879	0	0.675722	0.719268	0.841168	0.79845	0.950893	0.311005	0.350515	0.259843	0.385417	0.463617	0.87037	0.808511	0.976684
190	0.951493	0.748588	0.894942	0.925926	0.722807	0.593838	0.746725	0.971831	0.75	0.781893	0.953368	0.987552	0.655678	0.687443	0.591304	0.597853	0.669802	0.604689	0.678615	0.758784	0.603518	0.724286	0.704836	0.727151	0.815195	0.915205	0.6875	0.586592	0.589844	1	0.828523	0.766442	0.917413	0.843685	0.792456	0	0.676805	0.719268	0.837789	0.790698	0.950893	0.308612	0.352577	0.259843	0.385417	0.403326	0.87037	0.808511	0.974093
191	0.947761	0.745763	0.891051	0.922222	0.719298	0.591036	0.737991	0.967136	0.746269	0.777778	0.948187	0.983402	0.655678	0.691109	0.591304	0.595376	0.670743	0.604689	0.643378	0.762838	0.607538	0.731429	0.709815	0.727823	0.815195	0.912281	0.682692	0.592179	0.609375	0.784722	0.842105	0.731029	0.920647	0.844402	0.849191	0	0.674099	0.719268	0.837789	0.782946	0.950893	0.301435	0.346392	0.259843	0.385417	0.453222	0.87037	0.808511	0.974093
192	0.94403	0.742938	0.88716	0.922222	0.719298	0.588235	0.515284	0.962441	0.738806	0.773663	0.994819	0.983402	0.659341	0.68561	0.577075	0.595376	0.67921	0.611156	0.655529	0.766216	0.612563	0.732143	0.709815	0.723118	0.811088	0.915205	0.677885	0.581006	0.605469	0.774306	0.840407	0.743676	0.9199	0.847906	0.780467	0	0.674099	0.719268	0.837789	0.775194	0.950893	0.301435	0.346392	0.259843	0.385417	0.438669	0.87037	0.787234	0.968912
193	0.932836	0.737288	0.879377	0.911111	0.708772	0.585434	0.724891	0.953052	0.735075	0.769547	0.932642	0.979253	0.655678	0.691109	0.589723	0.601156	0.676388	0.607922	0.650061	0.768919	0.615578	0.715714	0.711949	0.743952	0.811088	0.906433	0.668269	0.592179	0.609375	0.746528	0.833616	0.796796	0.921642	0.845756	0.830406	0	0.67345	0.719268	0.834409	0.775194	0.950893	0.303828	0.290722	0.267717	0.385417	0.544699	0.87037	0.787234	0.971503
194	0.932836	0.737288	0.879377	0.911111	0.708772	0.582633	0.724891	0.953052	0.731343	0.769547	0.932642	0.979253	0.655678	0.691109	0.588933	0.601156	0.681091	0.607114	0.649453	0.769595	0.616583	0.712857	0.709815	0.745968	0.811088	0.909357	0.668269	0.586592	0.605469	0.770833	0.826825	0.789207	0.920896	0.847189	0.81544	0	0.673125	0.719268	0.834409	0.775194	0.950893	0.303828	0.336082	0.270341	0.385417	0.52183	0.87037	0.787234	0.971503
195	0.929104	0.734463	0.875486	0.907407	0.705263	0.582633	0.724891	0.953052	0.731343	0.769547	0.932642	0.975104	0.659341	0.691109	0.587352	0.601982	0.688617	0.607114	0.657351	0.764865	0.613568	0.705714	0.708393	0.747984	0.815195	0.906433	0.668269	0.581006	0.597656	0.805556	0.840407	0.790894	0.922886	0.846154	0.828803	0	0.672367	0.719268	0.83103	0.767442	0.950893	0.30622	0.342268	0.267717	0.385417	0.550936	0.87037	0.787234	0.968912
196	0.925373	0.734463	0.875486	0.903704	0.705263	0.579832	0.724891	0.948357	0.727612	0.769547	0.932642	0.970954	0.657509	0.694775	0.588142	0.601982	0.688617	0.610348	0.653098	0.751351	0.607035	0.697143	0.696302	0.749328	0.815195	0.906433	0.663462	0.597765	0.628906	0.819444	0.83871	0.833895	0.925373	0.852524	0.801619	0	0.674315	0.719268	0.834409	0.767442	0.950893	0.311005	0.342268	0.267717	0.385417	0.561331	0.87037	0.787234	0.968912
197	0.921642	0.731638	0.871595	0.9	0.701754	0.577031	0.720524	0.948357	0.727612	0.765432	0.927461	0.970954	0.657509	0.696609	0.587352	0.604459	0.688617	0.608731	0.653098	0.741892	0.598995	0.687143	0.685633	0.745968	0.815195	0.906433	0.663462	0.592179	0.617188	0.788194	0.835314	0.862563	0.926866	0.850135	0.816814	0	0.673666	0.719268	0.83103	0.767442	0.950893	0.308612	0.346392	0.267717	0.385417	0.538462	0.87037	0.787234	0.968912
198	0.921642	0.728814	0.871595	0.9	0.701754	0.57423	0.720524	0.948357	0.723881	0.761317	0.927461	0.970954	0.657509	0.696609	0.588142	0.604459	0.682973	0.611964	0.663426	0.747297	0.607538	0.690714	0.689189	0.757392	0.819302	0.912281	0.658654	0.603352	0.601562	0.777778	0.830221	0.924958	0.927861	0.851569	0.814676	0	0.673341	0.719268	0.82765	0.75969	0.950893	0.311005	0.292784	0.270341	0.385417	0.575884	0.87037	0.765957	0.971503
199	0.91791	0.725989	0.867704	0.896296	0.698246	0.571429	0.71179	0.943662	0.720149	0.757202	0.92228	0.970954	0.659341	0.692942	0.586561	0.601156	0.681091	0.613581	0.656136	0.756081	0.61005	0.707143	0.699858	0.770161	0.823409	0.915205	0.658654	0.614525	0.617188	0.822917	0.82343	0.916526	0.9301	0.85563	0.820938	0	0.669337	0.719268	0.824271	0.744186	0.950893	0.308612	0.338144	0.265092	0.385417	0.480249	0.87037	0.744681	0.979275
200	0.914179	0.723164	0.859922	0.892593	0.694737	0.571429	0.71179	0.943662	0.720149	0.753086	0.917098	0.966805	0.661172	0.690192	0.583399	0.597853	0.674506	0.607114	0.654313	0.762162	0.605528	0.714286	0.704125	0.766801	0.827515	0.915205	0.653846	0.625698	0.625	0.746528	0.826825	0.889545	0.928607	0.852285	0.820785	0	0.668579	0.719268	0.824271	0.75969	0.950893	0.303828	0.348454	0.267717	0.385417	0.422037	0.851852	0.744681	0.981865
201	0.914179	0.723164	0.863813	0.896296	0.694737	0.571429	0.716157	0.943662	0.720149	0.757202	0.927461	0.970954	0.652015	0.681943	0.577075	0.592073	0.669802	0.60388	0.660996	0.769595	0.613065	0.717857	0.708393	0.762769	1	0.897661	0.658654	0.625698	0.640625	0.767361	0.826825	0.940135	0.920896	0.84695	0.837126	0	0.668471	0.719268	0.834409	0.782946	0.950893	0.318182	0.296907	0.265092	0.385417	0.370062	0.851852	0.744681	0.976684
202	0.921642	0.728814	0.871595	0.9	0.701754	0.577031	0.724891	0.953052	0.727612	0.769547	0.932642	0.975104	0.653846	0.683776	0.576285	0.59455	0.699906	0.606306	0.655529	0.764189	0.614573	0.717143	0.702703	0.769489	0.819302	0.890351	0.668269	0.608939	0.621094	0.815972	0.831919	0.974705	0.913682	0.848224	0.816051	0	0.670852	0.719268	0.841168	0.790698	0.950893	0.303828	0.305155	0.270341	0.385417	0.444906	0.833333	0.765957	0.968912
203	0.925373	0.734463	0.875486	0.907407	0.705263	0.582633	0.733624	0.957746	0.735075	0.773663	0.943005	0.983402	0.655678	0.683776	0.574704	0.59455	0.698024	0.606306	0.653098	0.756081	0.607538	0.716429	0.697724	0.745296	0.819302	0.897661	0.673077	0.592179	0.601562	0.756944	0.831919	0.876897	0.915672	0.846552	0.0829261	0	0.668795	0.719268	0.844547	0.790698	0.950893	0.318182	0.338144	0.265092	0.385417	0.482328	0.833333	0.765957	0.966321
204	0.936567	0.740113	0.883268	0.914815	0.715789	0.588235	0.746725	0.971831	0.746269	0.777778	0.948187	0.987552	0.656593	0.68286	0.571542	0.59455	0.698024	0.610348	0.652491	0.75473	0.624623	0.715	0.711238	0.760081	0.819302	0.906433	0.677885	0.586592	0.59375	0.756944	0.83871	0.891231	0.908209	0.841774	0.797037	0	0.665765	0.719268	0.847927	0.806202	0.950893	0.301435	0.340206	0.265092	0.385417	0.476091	0.833333	0.765957	0.974093
205	0.936567	0.740113	0.883268	0.914815	0.715789	0.588235	0.746725	0.971831	0.746269	0.781893	0.958549	0.987552	0.657509	0.68561	0.574704	0.598679	0.698024	0.604689	0.656744	0.760811	0.621608	0.721429	0.711949	0.762769	0.827515	0.915205	0.6875	0.581006	0.585938	0.756944	0.840407	0.967116	0.909701	0.843606	0.794441	0	0.665873	0.719268	0.851306	0.813953	0.950893	0.294258	0.342268	0.262467	0.385417	0.422037	0.833333	0.765957	0.979275
206	0.940299	0.742938	0.891051	0.918519	0.719298	0.591036	0.746725	0.971831	0.75	0.786008	0.958549	0.991701	0.655678	0.68286	0.577866	0.595376	0.697084	0.607922	0.658566	0.757432	0.615578	0.719286	0.715505	0.768145	0.823409	0.915205	0.692308	0.575419	0.582031	0.829861	0.828523	0.976391	0.909453	0.84042	0.792761	0	0.668038	0.719268	0.851306	0.813953	0.950893	0.301435	0.346392	0.270341	0.385417	0.403326	0.833333	0.765957	0.974093
207	0.94403	0.742938	0.891051	0.922222	0.722807	0.593838	0.751092	0.976526	0.75	0.790123	0.963731	0.995851	0.657509	0.683776	0.578656	0.595376	0.694262	0.608731	0.653098	0.757432	0.610553	0.719286	0.711238	0.769489	0.819302	0.912281	0.692308	0.586592	0.605469	0.826389	0.831919	0.978921	0.909701	0.83827	0.832773	0	0.667496	0.719268	0.851306	0.806202	0.950893	0.294258	0.354639	0.265092	0.385417	0.409563	0.814815	0.787234	0.974093
208	0.94403	0.745763	0.891051	0.922222	0.722807	0.593838	0.755459	0.976526	0.75	0.790123	0.963731	0.995851	0.657509	0.681943	0.572332	0.595376	0.691439	0.613581	0.659781	0.756757	0.617588	0.72	0.711238	0.770161	0.819302	0.906433	0.692308	0.586592	0.59375	0.767361	0.835314	0.989882	0.909701	0.843765	0.825672	0	0.67096	0.719268	0.854686	0.806202	0.950893	0.301435	0.334021	0.265092	0.385417	0.372141	0.851852	0.787234	0.976684
209	0.947761	0.745763	0.894942	0.925926	0.722807	0.596639	0.755459	0.981221	0.753731	0.790123	0.968912	0.995851	0.653846	0.67736	0.56917	0.59455	0.690499	0.608731	0.667072	0.759459	0.620603	0.723571	0.720484	0.756048	0.819302	0.903509	0.697115	0.575419	0.589844	0.784722	0.842105	0.866779	0.911692	0.837554	0.839722	0	0.670419	0.719268	0.858065	0.79845	0.950893	0.299043	0.331959	0.265092	0.385417	0.409563	0.851852	0.787234	0.971503
210	0.947761	0.748588	0.894942	0.925926	0.722807	0.596639	0.755459	0.981221	0.753731	0.790123	0.968912	0.995851	0.648352	0.676444	0.566008	0.591247	0.686736	0.606306	0.657959	0.758784	0.623116	0.704286	0.721906	0.731855	0.819302	0.906433	0.697115	0.581006	0.589844	0.822917	0.847199	0.838111	0.91194	0.838589	0.823076	0	0.671718	0.719268	0.861444	0.790698	0.950893	0.303828	0.362887	0.265092	0.385417	0.422037	0.851852	0.787234	0.968912
211	0.94403	0.748588	0.894942	0.925926	0.722807	0.596639	0.751092	0.976526	0.753731	0.790123	0.968912	0.995851	0.650183	0.676444	0.566798	0.592073	0.67921	0.608731	0.662211	0.756757	0.621608	0.697857	0.727596	0.733871	0.811088	0.900585	0.692308	0.586592	0.59375	0.777778	0.845501	0.836425	0.91194	0.841137	0.830635	0	0.673774	0.719268	0.861444	0.782946	0.950893	0.303828	0.342268	0.265092	0.385417	0.530146	0.851852	0.787234	0.968912
212	0.940299	0.745763	0.894942	0.925926	0.719298	0.596639	0.746725	0.971831	0.75	0.786008	0.963731	0.995851	0.648352	0.67461	0.565217	0.587118	0.668862	0.60388	0.662211	0.757432	0.626131	0.690714	0.721906	0.725806	0.806982	0.894737	0.6875	0.592179	0.597656	0.784722	0.847199	0.773187	0.91592	0.840739	0.825519	0	0.668471	0.719268	0.858065	0.790698	0.950893	0.30622	0.334021	0.265092	0.385417	0.550936	0.851852	0.787234	0.958549
213	0.940299	0.742938	0.891051	0.922222	0.719298	0.593838	0.742358	0.971831	0.75	0.781893	0.958549	0.995851	0.644689	0.647113	0.575494	0.592073	0.678269	0.609539	0.651276	0.765541	0.628643	0.687857	0.721195	0.72043	0.806982	0.900585	0.6875	0.581006	0.589844	0.822917	0.840407	0.772344	0.917413	0.842491	0.828421	0	0.675939	0.719268	0.854686	0.782946	0.950893	0.303828	0.338144	0.265092	0.385417	0.582121	0.87037	0.787234	0.96114
214	0.932836	0.740113	0.88716	0.918519	0.712281	0.591036	0.737991	0.967136	0.746269	0.777778	0.958549	0.991701	0.641026	0.678277	0.563636	0.616846	0.670743	0.605497	0.6452	0.762838	0.616583	0.687143	0.723329	0.713038	0.811088	0.906433	0.682692	0.581006	0.589844	0.777778	0.850594	0.674536	0.917413	0.84472	0.820021	0	0.675722	0.719268	0.851306	0.782946	0.950893	0.303828	0.334021	0.265092	0.385417	0.619543	0.87037	0.787234	0.96114
215	0.929104	0.737288	0.883268	0.914815	0.708772	0.588235	0.733624	0.962441	0.738806	0.773663	0.953368	0.987552	0.64652	0.676444	0.562846	0.58877	0.686736	0.606306	0.6452	0.762838	0.605025	0.700714	0.724751	0.727151	0.811088	0.909357	0.677885	0.575419	0.597656	0.850694	0.83871	0.72344	0.794527	0.846393	0.793296	0	0.674748	0.719268	0.851306	0.782946	0.950893	0.30622	0.303093	0.265092	0.385417	0.569647	0.87037	0.787234	0.963731
216	0.929104	0.737288	0.879377	0.914815	0.708772	0.588235	0.733624	0.962441	0.738806	0.773663	0.953368	0.987552	0.64652	0.678277	0.557312	0.58877	0.683913	0.606306	0.704739	0.760135	0.600503	0.702857	0.726174	0.735215	0.811088	0.909357	0.677885	0.569832	0.589844	0.784722	0.842105	0.732715	0.920149	0.840341	0.787492	0	0.675398	0.719268	0.851306	0.775194	0.950893	0.303828	0.309278	0.265092	0.385417	0.588358	0.87037	0.787234	0.963731
217	0.925373	0.734463	0.875486	0.911111	0.705263	0.585434	0.729258	0.957746	0.738806	0.769547	0.953368	0.983402	0.652015	0.683776	0.563636	0.593724	0.693321	0.611156	0.657351	0.757432	0.603015	0.717857	0.726885	0.756048	0.823409	0.94152	0.673077	0.575419	0.589844	0.826389	0.83871	0.769815	0.9199	0.848782	0.823763	0	0.673991	0.719268	0.854686	0.767442	0.950893	0.313397	0.331959	0.259843	0.375	0.532225	0.87037	0.787234	0.974093
218	0.921642	0.734463	0.871595	0.907407	0.701754	0.582633	0.724891	0.957746	0.735075	0.765432	0.953368	0.983402	0.655678	0.68561	0.562846	0.595376	0.698965	0.611964	0.662819	0.758784	0.605528	0.724286	0.724751	0.758737	0.819302	0.915205	0.668269	0.569832	0.59375	0.847222	0.837012	0.762226	0.920896	0.847428	0.809102	0	0.672475	0.719268	0.858065	0.75969	0.950893	0.311005	0.342268	0.262467	0.375	0.540541	0.87037	0.787234	0.981865
219	0.921642	0.731638	0.871595	0.907407	0.701754	0.582633	0.724891	0.957746	0.735075	0.765432	0.953368	0.983402	0.650183	0.68561	0.562846	0.598679	0.688617	0.612773	0.647631	0.756757	0.8	0.727143	0.721906	0.764785	0.819302	0.909357	0.668269	0.625698	0.625	0.791667	0.826825	0.747892	0.926617	0.850374	0.820021	0	0.673558	0.719268	0.858065	0.767442	0.950893	0.303828	0.340206	0.259843	0.375	0.511435	0.87037	0.787234	0.976684
220	0.914179	0.731638	0.863813	0.9	0.694737	0.579832	0.720524	0.948357	0.731343	0.757202	0.948187	0.979253	0.653846	0.690192	0.566798	0.601982	0.690499	0.61924	0.643378	0.756081	0.8	0.729286	0.721195	0.766801	0.811088	0.897661	0.658654	0.614525	0.652344	0.815972	0.83871	0.745363	0.927861	0.849259	0.824068	0	0.674315	0.719268	0.854686	0.775194	0.950893	0.330144	0.331959	0.259843	0.375	0.513514	0.888889	0.765957	0.971503
221	0.906716	0.725989	0.859922	0.896296	0.687719	0.57423	0.71179	0.943662	0.727612	0.753086	0.937824	0.975104	0.663004	0.694775	0.566008	0.604459	0.698965	0.616006	0.654921	0.0202703	0.8	0.717143	0.719061	0.766801	0.798768	0.894737	0.653846	0.592179	0.601562	0.829861	0.828523	0.752951	0.931343	0.855311	0.826665	0	0.675831	0.719268	0.844547	0.751938	0.950893	0.311005	0.327835	0.262467	0.375	0.509356	0.87037	0.765957	0.958549
222	0.902985	0.723164	0.856031	0.892593	0.684211	0.571429	0.707424	0.943662	0.723881	0.748971	0.937824	0.970954	0.663004	0.693859	0.562055	0.602808	0.700847	0.617623	0.661604	0.764865	0.582915	0.719286	0.720484	0.770161	0.806982	0.906433	0.649038	0.608939	0.601562	0.777778	0.831919	0.756324	0.931841	0.854037	0.82048	0	0.669012	0.719268	0.824271	0.744186	0.950893	0.313397	0.290722	0.262467	0.375	0.571726	0.87037	0.744681	0.958549
223	0.899254	0.720339	0.85214	0.888889	0.680702	0.568627	0.707424	0.938967	0.720149	0.744856	0.932642	0.970954	0.659341	0.690192	0.562055	0.598679	0.693321	0.61924	0.653098	0.763514	0.8	0.72	0.720484	0.764785	0.811088	0.909357	0.649038	0.597765	0.589844	0.767361	0.828523	0.757167	0.929602	0.852445	0.829032	0	0.672908	0.719268	0.834409	0.751938	0.950893	0.308612	0.331959	0.257218	0.375	0.577963	0.87037	0.765957	0.968912
224	0.899254	0.720339	0.85214	0.888889	0.680702	0.568627	0.707424	0.938967	0.720149	0.748971	0.932642	0.970954	0.661172	0.687443	0.562055	0.598679	0.690499	0.616815	0.650668	0.764189	0.58995	0.717143	0.720484	0.761425	0.806982	0.900585	0.653846	0.592179	0.589844	0.802083	0.833616	0.693929	0.928109	0.852604	0.841249	0	0.67345	0.719268	0.834409	0.75969	0.950893	0.318182	0.292784	0.262467	0.375	0.590437	0.87037	0.765957	0.966321
225	0.906716	0.723164	0.859922	0.896296	0.684211	0.571429	0.716157	0.943662	0.727612	0.761317	0.943005	0.979253	0.652015	0.68011	0.548617	0.59455	0.689558	0.611156	0.6452	0.762162	0.603015	0.716429	0.717639	0.766801	0.815195	0.903509	0.658654	0.603352	0.597656	0.819444	0.831919	0.795953	0.922388	0.846552	0.780238	0	0.671934	0.719268	0.841168	0.775194	0.950893	0.313397	0.292784	0.262467	0.375	0.580042	0.851852	0.765957	0.974093
226	0.906716	0.725989	0.863813	0.92963	0.687719	0.57423	0.720524	0.948357	0.727612	0.765432	0.948187	0.983402	0.650183	0.68011	0.547036	0.593724	0.683913	0.612773	0.651883	0.764189	0.596482	0.712143	0.743954	0.758065	0.815195	0.903509	0.663462	0.608939	0.601562	0.809028	0.826825	0.881956	0.924129	0.847587	0.783903	0	0.671826	0.719268	0.841168	0.775194	0.950893	0.303828	0.336082	0.262467	0.375	0.56341	0.851852	0.765957	0.971503
227	0.914179	0.731638	0.871595	0.903704	0.694737	0.582633	0.729258	0.957746	0.738806	0.777778	0.958549	0.987552	0.650183	0.678277	0.544664	0.58877	0.680151	0.607922	0.657959	0.762838	0.619598	0.708571	0.708393	0.758737	0.819302	0.906433	0.673077	0.625698	0.664062	0.809028	0.837012	0.879427	0.920398	0.839226	0.816203	0	0.665656	0.719268	0.847927	0.790698	0.950893	0.327751	0.350515	0.262467	0.375	0.565489	0.814815	0.744681	0.971503
228	0.914179	0.731638	0.871595	0.903704	0.694737	0.582633	0.729258	0.957746	0.738806	0.777778	0.958549	0.987552	0.650183	0.67736	0.543874	0.591247	0.678269	0.608731	0.656136	0.766216	0.621608	0.707143	0.715505	0.758737	0.819302	0.909357	0.673077	0.620112	0.652344	0.815972	0.835314	0.866779	0.918159	0.844959	0.809255	0	0.665224	0.719268	0.847927	0.790698	0.950893	0.311005	0.356701	0.262467	0.375	0.553015	0.814815	0.744681	0.971503
229	0.921642	0.734463	0.875486	0.911111	0.694737	0.585434	0.737991	0.967136	0.738806	0.781893	0.963731	0.991701	0.652015	0.678277	0.543874	0.591247	0.865475	0.611964	0.658566	0.766216	0.626633	0.714286	0.72404	0.766801	0.831622	0.918129	0.682692	0.603352	0.589844	0.888889	0.826825	0.893761	0.915672	0.8405	0.793983	0	0.662409	0.719268	0.844547	0.806202	0.950893	0.320574	0.290722	0.262467	0.375	0.503119	0.833333	0.744681	0.989637
230	0.925373	0.734463	0.879377	0.911111	0.694737	0.585434	0.737991	0.967136	0.742537	0.781893	0.963731	0.991701	0.653846	0.68011	0.544664	0.591247	0.678269	0.611964	0.658566	0.762162	0.621608	0.714286	0.928876	0.766129	0.831622	0.926901	0.682692	0.614525	0.609375	0.892361	0.825127	0.876897	0.917164	0.841774	0.07865	0	0.662734	0.719268	0.844547	0.806202	0.950893	0.30622	0.350515	0.262467	0.375	0.480249	0.833333	0.744681	0.989637
231	0.925373	0.737288	0.879377	0.911111	0.698246	0.588235	0.737991	0.967136	0.746269	0.786008	0.958549	0.995851	0.650183	0.68011	0.545455	0.595376	0.675447	0.615198	0.656136	0.766216	0.619095	0.714286	0.715505	0.766801	0.827515	0.912281	0.6875	0.620112	0.597656	0.871528	0.821732	0.84317	0.915423	0.843208	0.831475	0	0.661868	0.719268	0.851306	0.806202	0.950893	0.334928	0.290722	0.262467	0.375	0.50104	0.814815	0.744681	0.987047
232	0.925373	0.737288	0.883268	0.911111	0.698246	0.588235	0.742358	0.967136	0.746269	0.786008	0.989637	0.995851	0.652015	0.68286	0.543083	0.596201	0.672625	0.61924	0.655529	0.765541	0.621106	0.717857	0.716927	0.00873656	0.823409	0.918129	0.6875	0.603352	0.582031	0.836806	0.826825	0.785835	0.91592	0.838111	0.824068	0	0.662193	0.719268	0.854686	0.806202	0.950893	0.30622	0.360825	0.262467	0.375	0.45738	0.814815	0.744681	0.979275
233	0.929104	0.742938	0.883268	0.911111	0.698246	0.588235	0.742358	0.967136	0.746269	0.786008	0.989637	0.995851	0.652015	0.68286	0.543083	0.596201	0.672625	0.61924	0.655529	0.765541	0.619598	0.719286	0.716216	0.767473	0.843943	0.910819	0.6875	0.606145	0.582031	0.84375	0.826825	0.809444	0.909701	0.841774	0.820785	0	0.661002	0.719268	0.854686	0.79845	0.950893	0.311005	0.358763	0.262467	0.375	0.455301	0.814815	0.723404	0.971503
234	0.929104	0.740113	0.883268	0.911111	0.698246	0.591036	0.746725	0.967136	0.75	0.781893	0.958549	0.995851	0.659341	0.687443	0.540711	0.593724	0.682973	0.617623	0.643378	0.766216	0.616583	0.713571	0.704125	0.770161	0.811088	0.909357	0.682692	0.597765	0.582031	0.868056	0.837012	0.804384	0.917413	0.84058	0.840409	0	0.658838	0.719268	0.861444	0.79845	0.950893	0.311005	0.329897	0.254593	0.375	0.995842	0.796296	0.744681	0.968912
235	0.929104	0.740113	0.879377	0.911111	0.698246	0.591036	0.746725	0.967136	0.75	0.781893	0.958549	0.995851	0.657509	0.687443	0.536759	0.595376	0.680151	0.611964	0.642163	0.765541	0.619095	0.713571	0.700569	0.770833	0.811088	0.903509	0.682692	0.581006	0.574219	0.902778	0.831919	0.801855	0.915423	0.841615	0.812385	0	0.665981	0.719268	0.861444	0.806202	0.950893	0.303828	0.34433	0.254593	0.375	0.536383	0.814815	0.765957	0.971503
236	0.925373	0.740113	0.879377	0.911111	0.694737	0.591036	0.746725	0.967136	0.75	0.781893	0.958549	0.995851	0.658425	0.687443	0.529644	0.59455	0.682032	0.610348	0.647023	0.758784	0.620603	0.707857	0.711238	0.765457	0.809035	0.916667	0.677885	0.583799	0.613281	0.871528	0.833616	0.661889	0.909701	0.841774	0.80704	0	0.664249	0.719268	0.858065	0.806202	0.950893	0.311005	0.358763	0.254593	0.375	0.517672	0.833333	0.765957	0.966321
237	0.921642	0.737288	0.875486	0.907407	0.691228	0.588235	0.737991	0.915493	0.746269	0.777778	0.953368	0.995851	0.659341	0.687443	0.542292	0.595376	0.683913	0.616815	0.654921	0.753378	0.621608	0.722143	0.715505	0.764113	0.806982	0.906433	0.673077	0.608939	0.628906	0.774306	0.821732	0.721754	0.924129	0.846472	0.774664	0	0.67096	0.719268	0.878341	0.813953	0.950893	0.311005	0.342268	0.251969	0.375	0.592516	0.833333	0.765957	0.958549
238	0.91791	0.734463	0.871595	0.9	0.687719	0.585434	0.733624	0.906103	0.742537	0.769547	0.943005	0.987552	0.663004	0.691109	0.580237	0.6218	0.683913	0.61439	0.652491	0.75473	0.621106	0.723571	0.715505	0.760081	0.790554	0.894737	0.668269	0.597765	0.628906	0.819444	0.804754	0.700675	0.925373	0.840659	0.741066	0	0.673017	0.719268	0.878341	0.806202	0.950893	0.311005	0.346392	0.251969	0.375	0.619543	0.833333	0.765957	0.96114
239	0.91791	0.734463	0.871595	0.896296	0.687719	0.582633	0.729258	0.920188	0.738806	0.769547	0.943005	0.987552	0.662088	0.694775	0.585771	0.622626	0.662277	0.616006	0.638518	0.75	0.620603	0.724286	0.727596	0.758737	0.790554	0.902047	0.668269	0.606145	0.625	0.836806	0.79966	0.672007	0.933085	0.840182	0.741524	0	0.683732	0.719268	0.8851	0.806202	0.950893	0.325359	0.352577	0.251969	0.375	0.704782	0.833333	0.765957	0.945596
240	0.91791	0.731638	0.867704	0.896296	0.684211	0.579832	0.724891	0.948357	0.738806	0.765432	0.937824	0.983402	0.655678	0.678277	0.535968	0.624277	0.686736	0.61924	0.64034	0.760135	0.620101	0.708571	0.704125	0.756048	0.786448	0.888889	0.668269	0.636872	0.695312	0.763889	0.787776	0.732715	0.927114	0.844004	0.733965	0	0.674748	0.719268	0.881721	0.813953	0.950893	0.325359	0.292784	0.254593	0.375	0.733888	0.851852	0.765957	0.945596
241	0.914179	0.728814	0.867704	0.896296	0.680702	0.577031	0.724891	0.948357	0.738806	0.765432	0.937824	0.983402	0.657509	0.696609	0.535178	0.601156	0.698024	0.615198	0.658566	0.753378	0.594975	0.702143	0.70697	0.747984	0.794661	0.894737	0.668269	0.614525	0.691406	0.739583	0.803056	0.588533	0.925622	0.841217	0.713653	0	0.671285	0.647445	0.881721	0.821705	0.950893	0.303828	0.410309	0.0944882	1	0.503119	0.87037	0.765957	0.945596
242	0.914179	0.728814	0.867704	0.896296	0.684211	0.577031	0.724891	0.948357	0.738806	0.769547	0.937824	0.979253	0.663004	0.703941	0.53834	0.611065	0.711195	0.621665	0.650061	0.768919	0.605025	0.692143	0.705548	0.737903	0.798768	0.900585	0.668269	0.625698	0.710938	0.736111	0.78438	0.710793	0.924129	0.845995	0.715486	0	0.671609	0.647445	0.878341	0.813953	0.950893	0.301435	0.395876	0.0944882	1	0.762994	0.851852	0.765957	0.950777
243	0.914179	0.728814	0.867704	0.896296	0.680702	0.57423	0.724891	0.943662	0.731343	0.765432	0.932642	0.979253	0.663004	0.703941	0.543083	0.614368	0.697084	0.626516	0.653706	0.744595	0.583417	0.692857	0.701991	0.744624	0.811088	0.909357	0.663462	0.659218	0.710938	0.798611	0.79966	0.653457	0.936816	0.849498	0.721747	0	0.673017	0.647445	0.878341	0.806202	0.950893	0.294258	0.346392	0.0944882	1	0.650728	0.87037	0.765957	0.963731
244	0.910448	0.728814	0.863813	0.892593	0.680702	0.57423	0.720524	0.943662	0.731343	0.761317	0.927461	0.975104	0.663004	0.703941	0.543874	0.612717	0.694262	0.624899	0.651883	0.737162	0.580905	0.691429	0.733997	0.739247	0.811088	0.909357	0.658654	0.664804	0.722656	0.822917	0.792869	0.653457	0.937811	0.849737	0.751222	0	0.672042	0.647445	0.874962	0.806202	0.950893	0.318182	0.340206	0.0944882	1	0.623701	0.87037	0.744681	0.968912
245	0.906716	0.723164	0.856031	0.885185	0.684211	0.568627	0.71179	0.934272	0.723881	0.753086	0.917098	0.970954	0.663004	0.705775	0.541502	0.611065	0.701787	0.620049	0.650061	0.736486	0.570352	0.704286	0.720484	0.739919	0.806982	0.912281	0.653846	0.664804	0.726562	0.78125	0.794567	0.609612	0.935323	0.854674	0.742135	0	0.672475	0.647445	0.864824	0.790698	0.950893	0.308612	0.346392	0.0944882	1	0.64657	0.87037	0.744681	0.966321
246	0.910448	0.720339	0.856031	0.885185	0.670175	0.565826	0.707424	0.934272	0.723881	0.753086	0.911917	0.970954	0.666667	0.694775	0.540711	0.612717	0.707432	0.622474	0.647631	0.758784	0.567839	0.711429	0.71266	0.737903	0.811088	0.918129	0.649038	0.631285	0.679688	0.78125	0.786078	0.623946	0.935572	0.845119	0.67051	0	0.671826	0.647445	0.858065	0.782946	0.950893	0.315789	0.309278	0.0944882	1	0.424116	0.87037	0.744681	0.963731
247	0.899254	0.720339	0.85214	0.881481	0.666667	0.565826	0.707424	0.934272	0.723881	0.748971	0.911917	0.970954	0.668498	0.707608	0.540711	0.614368	0.708373	0.626516	0.648846	0.752027	0.60402	0.728571	0.711238	0.738575	0.811088	0.912281	0.649038	0.659218	0.710938	0.770833	0.787776	0.668634	0.93806	0.853719	0.734957	0	0.673233	0.647445	0.851306	0.775194	0.950893	0.30622	0.342268	0.0944882	1	0.677755	0.87037	0.744681	0.968912
248	0.899254	0.720339	0.85214	0.881481	0.666667	0.565826	0.707424	0.929577	0.720149	0.748971	0.911917	0.970954	0.67033	0.707608	0.539921	0.61602	0.712135	0.628133	0.651883	0.75473	0.605025	0.714286	0.713371	0.740591	0.811088	0.912281	0.649038	0.664804	0.707031	0.78125	0.787776	0.673693	0.936318	0.847269	0.747251	0	0.6728	0.647445	0.854686	0.782946	0.950893	0.299043	0.346392	0.0944882	1	0.681913	0.87037	0.744681	0.971503
249	0.902985	0.720339	0.856031	0.888889	0.670175	0.568627	0.71179	0.934272	0.720149	0.757202	0.92228	0.970954	0.666667	0.711274	0.541502	0.624277	0.706491	0.626516	0.638518	0.758108	0.61407	0.685714	0.706259	0.754704	0.811088	0.909357	0.653846	0.670391	0.714844	0.795139	0.775891	0.703204	0.929851	0.843208	0.703803	0	0.669553	0.647445	0.861444	0.806202	0.950893	0.325359	0.348454	0.0944882	1	0.592516	0.851852	0.744681	0.974093
250	0.910448	0.725989	0.863813	0.896296	0.677193	0.571429	0.724891	0.943662	0.723881	0.765432	0.932642	0.979253	0.673993	0.713107	0.53834	0.619323	0.709313	0.633791	0.643378	0.750676	0.624121	0.702857	0.706259	0.745296	0.811088	0.912281	0.658654	0.675978	0.726562	0.8125	0.789474	0.650084	0.929353	0.847269	0.739233	0	0.668146	0.647445	0.868203	0.821705	0.950893	0.311005	0.340206	0.0944882	1	0.64657	0.833333	0.765957	0.979275
251	0.914179	0.728814	0.871595	0.9	0.680702	0.57423	0.724891	0.948357	0.727612	0.773663	0.937824	0.983402	0.677656	0.716774	0.53834	0.622626	0.712135	0.63945	0.64277	0.743919	0.623116	0.709286	0.705548	0.738575	0.811088	0.909357	0.668269	0.670391	0.707031	0.767361	0.792869	0.645025	0.926119	0.838828	0.728009	0	0.66728	0.647445	0.874962	0.829457	0.950893	0.315789	0.334021	0.0944882	1	0.507277	0.833333	0.765957	0.976684
252	0.925373	0.737288	0.879377	0.911111	0.691228	0.582633	0.737991	0.957746	0.731343	0.781893	0.953368	0.987552	0.677656	0.71494	0.539921	0.620149	0.710254	0.6346	0.647631	0.75473	0.606533	0.720714	0.706259	0.747312	0.811088	0.912281	0.677885	0.659218	0.71875	0.8125	0.794567	0.643339	0.921144	0.835404	0.734805	0	0.665007	0.647445	0.8851	0.860465	0.950893	0.327751	0.323711	0.0944882	1	0.56341	0.814815	0.744681	0.974093
253	0.929104	0.740113	0.879377	0.914815	0.694737	0.585434	0.746725	0.962441	0.738806	0.786008	0.963731	0.991701	0.675824	0.71494	0.53834	0.620149	0.709313	0.6346	0.654313	0.760135	0.61608	0.696429	0.708393	0.75	0.806982	0.906433	0.682692	0.648045	0.714844	0.920139	0.794567	0.651771	0.921144	0.833891	0.716402	0	0.664574	0.647445	0.88848	0.860465	0.950893	0.303828	0.348454	0.0944882	1	0.569647	0.814815	0.744681	0.971503
254	0.929104	0.745763	0.894942	0.922222	0.705263	0.591036	0.751092	0.971831	0.746269	0.794239	0.974093	0.995851	0.673993	0.711274	0.537549	0.620149	0.701787	0.632175	0.637303	0.75473	0.622613	0.692143	0.710526	0.750672	0.806982	0.909357	0.692308	0.659218	0.746094	0.822917	0.791171	0.637437	0.91791	0.828237	0.73595	0	0.663816	0.647445	0.905377	0.891473	0.950893	0.313397	0.290722	0.0944882	1	0.592516	0.796296	0.744681	0.971503
255	0.940299	0.745763	0.894942	0.925926	0.705263	0.593838	0.755459	0.971831	0.753731	0.798354	0.984456	1	0.673993	0.711274	0.537549	0.620149	0.698965	0.632175	0.648846	0.75473	0.617588	0.7	0.709815	0.75336	0.806982	0.912281	0.697115	0.659218	0.742188	0.788194	0.791171	0.639966	0.918159	0.835404	0.738775	0	0.663816	0.647445	0.905377	0.899225	0.950893	0.30622	0.342268	0.0944882	1	0.56341	0.796296	0.744681	0.971503
256	0.94403	0.748588	0.902724	0.92963	0.708772	0.593838	0.755459	0.971831	0.753731	0.773663	0.989637	1	0.659341	0.703941	0.525692	0.614368	0.695202	0.628941	0.663426	0.753378	0.619598	0.723571	0.711238	0.757392	0.819302	0.906433	0.692308	0.648045	0.714844	0.78125	0.796265	0.618887	0.915672	0.810161	0.714646	0	0.658513	0.647445	0.905377	0.891473	0.950893	0.301435	0.331959	0.0944882	1	0.528067	0.796296	0.744681	0.971503
257	0.94403	0.748588	0.902724	0.92963	0.708772	0.596639	0.755459	0.971831	0.723881	0.773663	1	1	0.673993	0.71494	0.535968	0.622626	0.70461	0.635408	0.651276	0.75473	0.609045	0.722143	0.709104	0.761425	0.790554	0.897661	0.6875	0.659218	0.738281	0.725694	0.757216	0.611298	0.920647	0.832935	0.501527	0	0.665332	0.647445	0.905377	0.891473	0.950893	0.311005	0.327835	0.0866142	0.875	0.613306	0.814815	0.744681	0.953368
258	0.94403	0.748588	0.902724	0.933333	0.708772	0.593838	0.751092	0.924883	0.761194	0.773663	1	1	0.672161	0.716774	0.53834	0.629232	0.70555	0.63945	0.653098	0.75473	0.614573	0.699286	0.707681	0.763441	0.786448	0.891813	0.6875	0.659218	0.75	0.736111	0.75382	0.608769	0.919652	0.811992	0.733888	0	0.665115	0.647445	0.908756	0.891473	0.950893	0.308612	0.336082	0.0866142	0.875	0.60499	0.814815	0.744681	0.950777
259	0.94403	0.748588	0.898833	0.92963	0.705263	0.593838	0.746725	0.967136	0.720149	0.794239	0.968912	0.995851	0.679487	0.713107	0.534387	0.626755	0.708373	0.633791	0.654921	0.755405	0.601005	0.674286	0.704125	0.764113	0.782341	0.897661	0.6875	0.648045	0.738281	0.711806	0.757216	0.610455	0.923134	0.834528	0.719914	0	0.666414	0.647445	0.912135	0.883721	0.950893	0.30622	0.327835	0.0866142	0.875	0.634096	0.814815	0.744681	0.945596
260	0.94403	0.745763	0.898833	0.92963	0.705263	0.591036	0.746725	0.962441	0.753731	0.794239	0.963731	0.995851	0.672161	0.71494	0.534387	0.629232	0.701787	0.633791	0.648846	0.75473	0.607035	0.675714	0.702703	0.763441	0.790554	0.900585	0.6875	0.670391	0.765625	0.763889	0.75382	0.616358	0.924627	0.832935	0.710751	0	0.666955	0.647445	0.912135	0.875969	0.950893	0.318182	0.354639	0.0866142	0.875	0.652807	0.814815	0.744681	0.950777
261	0.94403	0.745763	0.898833	0.92963	0.705263	0.591036	0.746725	0.962441	0.75	0.790123	0.958549	0.966805	0.679487	0.71494	0.536759	0.626755	0.70461	0.635408	0.654313	0.756081	0.607035	0.697857	0.704125	0.761425	0.790554	0.900585	0.6875	0.659218	0.742188	0.697917	0.747029	0.62226	0.925871	0.837156	0.717547	0	0.667064	0.647445	0.908756	0.875969	0.950893	0.308612	0.346392	0.0866142	0.875	0.629938	0.814815	0.744681	0.950777
262	0.940299	0.745763	0.898833	0.925926	0.705263	0.591036	0.746725	0.962441	0.75	0.786008	0.953368	0.970954	0.688645	0.71494	0.535968	0.623452	0.70555	0.6346	0.652491	0.750676	0.609548	0.699286	0.703414	0.758737	0.792608	0.904971	0.682692	0.662011	0.75	0.725694	0.747029	0.621417	0.928109	0.841774	0.711286	0	0.668362	0.647445	0.925653	0.875969	0.950893	0.313397	0.346392	0.0866142	0.875	0.632017	0.814815	0.744681	0.955959
263	0.940299	0.745763	0.894942	0.925926	0.701754	0.588235	0.742358	0.957746	0.75	0.786008	0.953368	0.987552	0.666667	0.711274	0.535178	0.61602	0.706491	0.632983	0.652491	0.756081	0.615075	0.720714	0.70128	0.75	0.794661	0.909357	0.677885	0.664804	0.753906	0.760417	0.748727	0.591906	0.927612	0.839226	0.722511	0	0.669228	0.647445	0.898618	0.868217	0.950893	0.318182	0.340206	0.0866142	0.875	0.642412	0.833333	0.744681	0.958549
264	0.936567	0.745763	0.891051	0.925926	0.701754	0.585434	0.737991	0.957746	0.746269	0.781893	0.948187	0.983402	0.664835	0.710357	0.533597	0.619323	0.701787	0.627324	0.651883	0.755405	0.61005	0.723571	0.70128	0.742608	0.794661	0.915205	0.677885	0.648045	0.0703125	0.777778	0.752122	0.599494	0.928856	0.837554	0.730757	0	0.669445	0.647445	0.898618	0.860465	0.950893	0.318182	0.348454	0.0866142	0.885417	0.66736	0.833333	0.744681	0.958549
265	0.86194	0.731638	0.809339	0.896296	0.740351	0.834734	0.724891	0.779343	0.712687	0.728395	0.818653	0.713693	0.728938	0.75527	0.602372	0.566474	0.707432	0.677445	0.690765	0.739189	0.574372	0.736429	0.741821	0.686828	0.716632	0.897661	0.557692	0.648045	0.785156	0.329861	0.745331	0.508432	0.716169	0.843765	0.687691	0.912222	0.905185	0.654351	0.401845	0.922481	0.171131	0.382775	0.364948	0.577428	0.302083	0.559252	0.87037	0.957447	0.84456
266	0.86194	0.728814	0.805447	0.855556	0.736842	0.831933	0.786026	0.779343	0.712687	0.728395	0.818653	0.713693	0.725275	0.661778	0.600791	0.564822	0.712135	0.675829	0.685905	0.735811	0.565829	0.738571	0.740398	0.755376	0.714579	0.893275	0.543269	0.636872	0.765625	0.371528	0.73854	0.488196	0.715174	0.843287	0.703497	0.911	0.904643	0.654351	0.398466	0.914729	0.171131	0.433014	0.364948	0.587927	0.302083	0.575884	0.87037	0.978723	0.841969
267	0.86194	0.728814	0.805447	0.855556	0.736842	0.831933	0.781659	0.774648	0.708955	0.72428	0.813472	0.709544	0.71978	0.754354	0.602372	0.562345	0.699906	0.675829	0.685905	0.731757	0.569849	0.718571	0.738976	0.756048	0.704312	0.890351	0.634615	0.614525	0.75	0.319444	0.741935	0.474705	0.717662	0.844163	0.712355	0.901222	0.882238	0.654351	0.391707	0.899225	0.168155	0.435407	0.325773	0.577428	0.302083	0.580042	0.87037	0.957447	0.834197
268	0.858209	0.723164	0.801556	0.855556	0.733333	0.831933	0.777293	0.769953	0.705224	0.720165	0.80829	0.709544	0.71978	0.753437	0.600791	0.563171	0.700847	0.673403	0.685905	0.734459	0.567337	0.718571	0.737553	0.752016	0.706366	0.887427	0.00961538	0.625698	0.757812	0.322917	0.741935	0.475548	0.718657	0.849737	0.715409	0.900333	0.880723	0.654351	0.391707	0.899225	0.168155	0.406699	0.325773	0.577428	0.302083	0.559252	0.87037	0.93617	0.831606
269	0.854478	0.720339	0.797665	0.855556	0.733333	0.829132	0.777293	0.765258	0.701493	0.716049	0.803109	0.701245	0.720696	0.747021	0.598419	0.563997	0.70461	0.674212	0.685905	0.72973	0.562312	0.715714	0.736842	0.754704	0.708419	0.897661	0.576923	0.636872	0.761719	0.315972	0.740238	0.478921	0.722139	0.847667	0.709148	0.892889	0.877043	0.654351	0.388328	0.891473	0.166667	0.382775	0.313402	0.577428	0.302083	0.594595	0.87037	0.93617	0.829016
270	0.850746	0.720339	0.801556	0.851852	0.729825	0.826331	0.772926	0.765258	0.701493	0.716049	0.80829	0.701245	0.720696	0.749771	0.597628	0.563997	0.703669	0.674212	0.681045	0.72973	0.562312	0.716429	0.737553	0.756048	0.710472	0.902047	0.567308	0.639665	0.773438	0.371528	0.741935	0.478078	0.723881	0.848145	0.757101	0.893	0.880723	0.654351	0.388328	0.883721	0.166667	0.397129	0.317526	0.577428	0.302083	0.600832	0.87037	0.93617	0.831606
271	0.850746	0.717514	0.793774	0.848148	0.726316	0.826331	0.772926	0.765258	0.697761	0.711934	0.792746	0.697095	0.717949	0.749771	0.596047	0.559868	0.702728	0.674212	0.678007	0.724324	0.565327	0.715	0.724751	0.750672	0.712526	0.904971	0.658654	0.642458	0.78125	0.329861	0.735144	0.477234	0.724378	0.849658	0.704032	0.916667	0.872497	0.654351	0.391707	0.875969	0.165179	0.416268	0.315464	0.574803	0.302083	0.619543	0.87037	0.914894	0.834197
272	0.847015	0.717514	0.789883	0.844444	0.722807	0.826331	0.768559	0.760563	0.69403	0.707819	0.792746	0.697095	0.720696	0.748854	0.596047	0.559868	0.714958	0.674212	0.0157959	0.72027	0.562814	0.711429	0.720484	0.745968	0.712526	0.904971	0.572115	0.642458	0.773438	0.333333	0.752122	0.489039	0.725124	0.850772	0.73763	0.920111	0.872605	0.654351	0.388328	0.868217	0.16369	0.433014	0.356701	0.580052	0.302083	0.675676	0.87037	0.914894	0.834197
273	0.847015	0.714689	0.785992	0.840741	0.719298	0.831933	0.764192	0.755869	0.69403	0.707819	0.787565	0.692946	0.717033	0.748854	0.602372	0.559868	0.716839	0.675829	0.683475	0.729054	0.562312	0.720714	0.732575	0.75	0.716632	0.906433	0.634615	0.620112	0.757812	0.40625	0.728353	0.545531	0.726617	0.849259	0.681124	0.992889	0.891763	0.632942	0.391707	0.875969	0.165179	0.423445	0.391753	0.55643	0.291667	0.496881	0.87037	0.93617	0.834197
274	0.847015	0.714689	0.785992	0.840741	0.719298	0.834734	0.759825	0.755869	0.69403	0.707819	0.787565	0.697095	0.714286	0.747938	0.599209	0.555739	0.71778	0.675829	0.681045	0.734459	0.563819	0.720714	0.736131	0.748656	0.716632	0.912281	0.653846	0.625698	0.773438	0.298611	0.716469	0.532884	0.725124	0.849578	0.686851	0.998444	0.894253	0.632942	0.384948	0.868217	0.165179	0.423445	0.352577	0.553806	0.291667	0.540541	0.87037	0.93617	0.841969
275	0.847015	0.714689	0.785992	0.840741	0.719298	0.834734	0.759825	0.755869	0.69403	0.707819	0.787565	0.697095	0.716117	0.744271	0.588933	0.557391	0.689558	0.672595	0.683475	0.739189	0.564824	0.730714	0.73542	0.74664	0.724846	0.916667	0.576923	0.636872	0.78125	0.357639	0.713073	0.526981	0.723632	0.848463	0.687309	0.984	0.887975	0.632942	0.388328	0.875969	0.166667	0.449761	0.358763	0.55643	0.291667	0.49896	0.87037	0.914894	0.84456
276	0.847015	0.714689	0.785992	0.837037	0.719298	0.837535	0.764192	0.755869	0.69403	0.707819	0.787565	0.697095	0.716117	0.747021	0.602372	0.559868	0.722484	0.673403	0.685298	0.741216	0.566834	0.726429	0.736842	0.74664	0.724846	0.919591	0.649038	0.631285	0.792969	0.302083	0.716469	0.551433	0.721642	0.846154	0.687462	0.999778	0.90237	0.632942	0.391707	0.883721	0.166667	0.409091	0.375258	0.551181	0.291667	0.530146	0.87037	0.93617	0.84456
277	0.850746	0.717514	0.789883	0.837037	0.722807	0.840336	0.764192	0.760563	0.69403	0.707819	0.792746	0.701245	0.71978	0.749771	0.603953	0.562345	0.635936	0.679871	0.68712	0.743919	0.568342	0.728571	0.736131	0.745968	0.728953	0.926901	0.649038	0.625698	0.773438	0.309028	0.70798	0.543002	0.720896	0.844561	0.687538	0.999	0.900963	0.632942	0.391707	0.891473	0.166667	0.435407	0.358763	0.551181	0.291667	0.555094	0.87037	0.93617	0.857513
278	0.850746	0.717514	0.789883	0.840741	0.722807	0.843137	0.768559	0.760563	0.69403	0.711934	0.792746	0.701245	0.722527	0.754354	0.604743	0.563997	0.735654	0.683104	0.68955	0.746622	0.571357	0.73	0.737553	0.745968	0.724846	0.925439	0.663462	0.625698	0.769531	0.336806	0.716469	0.513491	0.721891	0.845835	0.689676	0.999667	0.896634	0.632942	0.388328	0.891473	0.166667	0.473684	0.350515	0.559055	0.291667	0.532225	0.87037	0.93617	0.857513
279	0.854478	0.717514	0.789883	0.840741	0.722807	0.843137	0.768559	0.760563	0.69403	0.711934	0.792746	0.705394	0.728022	0.758937	0.611067	0.5673	0.737535	0.683913	0.690158	0.747973	0.569849	0.734286	0.737553	0.74664	0.724846	0.922515	0.663462	0.620112	0.769531	0.388889	0.713073	0.522766	0.722388	0.845596	0.674481	0.989556	0.898149	0.632942	0.391707	0.883721	0.168155	0.442584	0.358763	0.56168	0.291667	0.509356	0.87037	0.93617	0.849741
280	0.854478	0.717514	0.789883	0.840741	0.722807	0.843137	0.768559	0.760563	0.69403	0.711934	0.792746	0.705394	0.729853	0.762603	0.611067	0.568951	0.739417	0.687955	0.694411	0.751351	0.571859	0.739286	0.746088	0.748656	0.724846	0.921053	0.663462	0.625698	0.777344	0.309028	0.711375	0.514334	0.721891	0.844004	0.686622	0.994444	0.894902	0.632942	0.395086	0.883721	0.169643	0.404306	0.356701	0.55643	0.291667	0.534304	0.87037	0.93617	0.849741
281	0.854478	0.717514	0.789883	0.840741	0.726316	0.848739	0.768559	0.765258	0.69403	0.711934	0.792746	0.705394	0.737179	0.768103	0.617391	0.574732	0.733772	0.693614	0.697448	0.758108	0.571357	0.75	0.752489	0.754704	0.720739	0.910819	0.634615	0.648045	0.816406	0.295139	0.706282	0.533727	0.719154	0.843208	0.678222	0.898	0.902803	0.632942	0.401845	0.899225	0.172619	0.404306	0.360825	0.55643	0.291667	0.523909	0.87037	0.93617	0.84456
282	0.86194	0.720339	0.793774	0.844444	0.729825	0.854342	0.772926	0.769953	0.701493	0.716049	0.797927	0.713693	0.749084	0.779102	0.621344	0.639967	0.71778	0.704123	0.694411	0.763514	0.563317	0.743571	0.731152	0.754704	0.720739	0.910819	0.649038	0.636872	0.773438	0.399306	0.716469	0.460371	0.719652	0.84257	0.672724	0.901556	0.910055	0.632942	0.395086	0.945736	0.172619	0.454545	0.362887	0.548556	0.28125	0.52183	0.87037	0.957447	0.84456
283	0.86194	0.720339	0.793774	0.844444	0.729825	0.854342	0.772926	0.769953	0.701493	0.716049	0.803109	0.713693	0.75	0.782768	0.621344	0.582989	0.722484	0.703314	0.691373	0.763514	0.563819	0.742857	0.758179	0.754704	0.720739	0.910819	0.658654	0.636872	0.78125	0.40625	0.716469	0.403879	0.718905	0.841137	0.610034	0.860111	0.906483	0.632942	0.398466	0.891473	0.174107	0.4689	0.381443	0.548556	0.28125	0.330561	0.87037	0.957447	0.84456
284	0.86194	0.723164	0.793774	0.848148	0.733333	0.857143	0.772926	0.769953	0.701493	0.720165	0.803109	0.717842	0.747253	0.785518	0.566798	0.629232	0.788335	0.706548	0.686513	0.754054	0.563819	0.740714	0.741821	0.752016	0.720739	0.910819	0.668269	0.636872	0.738281	0.315972	0.719864	0.416526	0.722388	0.839545	0.687309	0.870111	0.892846	0.632942	0.391707	0.875969	0.171131	0.476077	0.348454	0.530184	0.270833	0.534304	0.87037	0.93617	0.84456
285	0.86194	0.720339	0.793774	0.848148	0.733333	0.857143	0.772926	0.765258	0.697761	0.720165	0.797927	0.713693	0.751832	0.784601	0.622134	0.583815	0.69238	0.645918	0.681652	0.739189	0.567337	0.740714	0.744666	0.751344	0.724846	0.912281	0.682692	0.620112	0.734375	0.326389	0.735144	0.41484	0.728358	0.844083	0.675703	0.881222	0.878234	0.632942	0.388328	0.860465	0.168155	0.456938	1	0.530184	0.270833	0.567568	0.87037	0.914894	0.841969
286	0.86194	0.720339	0.789883	0.844444	0.733333	0.857143	0.768559	0.760563	0.69403	0.711934	0.792746	0.709544	0.747253	0.783685	0.619763	0.582989	0.71778	0.706548	0.676792	0.742568	0.565327	0.740714	0.743954	0.751344	0.728953	0.912281	0.673077	0.167598	0.730469	0.347222	0.747029	0.44688	0.733333	0.846711	0.690211	0.905556	0.878125	0.632942	0.388328	0.844961	0.165179	0.447368	0.4	0.543307	0.270833	0.555094	0.87037	0.914894	0.841969
287	0.86194	0.717514	0.789883	0.844444	0.729825	0.857143	0.768559	0.765258	0.690299	0.711934	0.792746	0.709544	0.74359	0.776352	0.624506	0.580512	0.695202	0.697656	0.693196	0.74527	0.562312	0.733571	0.734708	0.748656	0.724846	0.912281	0.673077	0.636872	0.722656	0.295139	0.714771	0.472175	0.506965	0.847587	0.691509	0.943778	0.847927	0.632942	0.388328	0.844961	0.165179	0.236842	0.348454	0.543307	0.270833	0.530146	0.851852	0.893617	0.841969
288	0.86194	0.745763	0.789883	0.840741	0.729825	0.857143	0.768559	0.760563	0.690299	0.707819	0.792746	0.705394	0.742674	0.774519	0.618972	0.580512	0.737535	0.662894	0.691373	0.753378	0.572864	0.727143	0.72973	0.748656	0.728953	0.913743	0.6875	0.614525	0.722656	0.34375	0.713073	0.50253	0.732338	0.846313	0.680284	0.968111	0.86005	0.632942	0.37481	0.829457	0.162202	0.397129	0.317526	0.543307	0.270833	0.503119	0.87037	0.893617	0.841969
289	0.83209	0.70339	0.81323	0.862963	0.642105	0.52381	0.585153	0.859155	0.597015	0.625514	0.80829	0.850622	0.685897	0.722273	0.579447	0.899257	0.660395	0.641876	0.676185	0.752027	0.59397	0.77	0.703414	0.743952	0.804928	0.906433	0.572115	0.600559	0.5625	0.600694	0.789474	0.716695	0.948756	0.889234	0.845907	0.973778	0.675939	0.755525	0.925653	0.72093	0.950893	0.492823	0.274227	0.895013	0.375	0.345114	0.888889	0.702128	0.987047
290	0.828358	0.70339	0.81323	0.862963	0.638596	0.521008	0.580786	0.85446	0.597015	0.621399	0.80829	0.846473	0.68315	0.722273	0.583399	0.899257	0.0329257	0.646726	0.67983	0.746622	0.581407	0.75	0.705548	0.743952	0.798768	0.903509	0.572115	0.592179	0.5625	0.548611	0.796265	0.615514	0.951244	0.92889	0.853772	0.943444	0.680052	0.755525	0.925653	0.72093	0.950893	0.519139	0.284536	0.858268	0.364583	0.37422	0.888889	0.702128	0.984456
291	0.824627	0.70339	0.809339	0.855556	0.635088	0.521008	0.576419	0.85446	0.593284	0.617284	0.803109	0.842324	0.684066	0.724106	0.585771	0.899257	0.661336	0.64996	0.679222	0.740541	0.575377	0.744286	0.708393	0.740591	0.802875	0.903509	0.567308	0.592179	0.546875	0.524306	0.809847	0.618044	0.953731	0.929129	0.861026	0.946556	0.676588	0.755525	0.925653	0.72093	0.950893	0.519139	0.274227	0.858268	0.364583	0.334719	0.888889	0.702128	0.984456
292	0.824627	0.700565	0.805447	0.855556	0.631579	0.518207	0.576419	0.849765	0.593284	0.613169	0.797927	0.842324	0.684066	0.718607	0.578656	0.899257	0.662277	0.648343	0.679222	0.736486	0.571357	0.742143	0.700569	0.738575	0.804928	0.907895	0.567308	0.594972	0.523438	0.569444	0.814941	0.618887	0.952985	0.93112	0.852016	0.950667	0.677454	0.755525	0.922274	0.713178	0.950893	0.54067	0.224742	0.858268	0.364583	0.37422	0.888889	0.702128	0.987047
293	0.820896	0.700565	0.805447	0.855556	0.631579	0.515406	0.576419	0.849765	0.589552	0.613169	0.792746	0.842324	0.673077	0.713107	0.581028	0.899257	0.656632	0.641876	0.676185	0.735135	0.574372	0.742143	0.704125	0.739919	0.802875	0.910819	0.567308	0.572626	0.523438	0.545139	0.792869	0.618887	0.953731	0.931358	0.852474	0.946444	0.677238	0.755525	0.925653	0.713178	0.950893	0.564593	0.226804	0.858268	0.364583	0.340956	0.888889	0.702128	0.989637
294	0.820896	0.700565	0.805447	0.851852	0.62807	0.515406	0.572052	0.849765	0.589552	0.613169	0.792746	0.842324	0.671245	0.700275	0.572332	0.899257	0.651929	0.633791	0.674362	0.731081	0.571859	0.736429	0.700569	0.737903	0.804928	0.907895	0.5625	0.592179	0.542969	0.576389	0.803056	0.623946	0.953731	0.930084	0.856063	0.957667	0.676913	0.755525	0.918894	0.705426	0.950893	0.574163	0.220619	0.860892	0.364583	0.343035	0.888889	0.702128	0.987047
295	0.817164	0.700565	0.801556	0.851852	0.624561	0.515406	0.572052	0.849765	0.589552	0.613169	0.792746	0.842324	0.668498	0.700275	0.56996	0.899257	0.64064	0.633791	0.673755	0	0.566332	0.745	0.692745	0.735887	0.790554	0.909357	0.557692	0.567039	0.539062	0.559028	0.787776	0.634907	0.954726	0.93096	0.868586	0.971222	0.677995	0.755525	0.918894	0.689922	0.950893	0.566986	0.224742	0.858268	0.364583	0.380457	0.87037	0.702128	0.976684
296	0.813433	0.69774	0.801556	0.851852	0.624561	0.512605	0.567686	0.84507	0.589552	0.613169	0.787565	0.842324	0.67033	0.700275	0.566798	0.899257	0.634055	0.630558	0.671932	0.727703	0.568844	0.745	0.711238	0.730511	0.794661	0.907895	0.557692	0.583799	0.53125	0.53125	0.792869	0.652614	0.954726	0.938525	0.882178	0.975333	0.678753	0.755525	0.915515	0.682171	0.950893	0.533493	0.284536	0.858268	0.364583	0.401247	0.87037	0.702128	0.974093
297	0.813433	0.694915	0.797665	0.848148	0.624561	0.509804	0.567686	0.84507	0.585821	0.613169	0.782383	0.842324	0.67033	0.703941	0.565217	0.899257	0.635936	0.625707	0.670109	0.722973	0.582412	0.743571	0.719772	0.742608	0.794661	0.907895	0.557692	0.572626	0.535156	0.538194	0.804754	0.663575	0.95199	0.928333	0.878589	0.982667	0.679403	0.755525	0.922274	0.705426	0.950893	0.511962	0.274227	0.860892	0.364583	0.0582121	0.888889	0.702128	0.974093
298	0.813433	0.694915	0.797665	0.848148	0.624561	0.512605	0.572052	0.849765	0.589552	0.613169	0.787565	0.842324	0.664835	0.702108	0.56996	0.635012	0.642521	0.630558	0.667679	0.721622	0.578392	0.745	0.715505	0.741263	0.802875	0.907895	0.5625	0.578212	0.542969	0.503472	0.801358	0.655987	0.94801	0.929607	0.871029	0.990333	0.677238	0.755525	0.929032	0.736434	0.950893	0.528708	0.280412	0.858268	0.364583	0.193347	0.87037	0.702128	0.979275
299	0.813433	0.69774	0.801556	0.848148	0.62807	0.512605	0.576419	0.849765	0.589552	0.617284	0.787565	0.842324	0.664835	0.702108	0.570751	0.635012	0.646284	0.632175	0.665857	0.719595	0.574372	0.743571	0.71835	0.739919	0.802875	0.907895	0.567308	0.572626	0.527344	0.538194	0.796265	0.6543	0.944527	0.922121	0.876527	0.984667	0.675614	0.755525	0.932412	0.744186	0.950893	0.521531	0.274227	0.860892	0.364583	0.278586	0.888889	0.702128	0.979275
300	0.820896	0.700565	0.805447	0.851852	0.62807	0.518207	0.580786	0.85446	0.593284	0.625514	0.797927	0.846473	0.668498	0.707608	0.573913	0.635012	0.669802	0.635408	0.665249	0.717568	0.573869	0.743571	0.725462	0.741263	0.798768	0.907895	0.5625	0.578212	0.554688	0.548611	0.794567	0.67285	0.941542	0.923077	0.83621	0.987333	0.675181	0.755525	0.939171	0.751938	0.950893	0.507177	0.272165	0.858268	0.364583	0.288981	0.87037	0.702128	0.981865
301	0.824627	0.70339	0.81323	0.855556	0.635088	0.518207	0.58952	0.86385	0.597015	0.62963	0.803109	0.850622	0.668498	0.707608	0.573123	0.638315	0.665099	0.637025	0.667072	0.718243	0.578894	0.746429	0.719772	0.75	0.802875	0.907895	0.567308	0.586592	0.546875	0.565972	0.792869	0.643339	0.940796	0.917344	0.844609	0.974444	0.682541	0.755525	0.949309	0.75969	0.950893	0.5	0.224742	0.858268	0.364583	0.37422	0.87037	0.702128	0.979275
302	0.83209	0.70904	0.821012	0.862963	0.642105	0.529412	0.598253	0.868545	0.600746	0.63786	0.818653	0.858921	0.665751	0.704858	0.574704	0.638315	0.683913	0.637025	0.668287	0.718919	0.575879	0.748571	0.721195	0.748656	0.804928	0.907895	0.576923	0.578212	0.542969	0.583333	0.791171	0.640809	0.935572	0.912008	0.862859	0.975111	0.681892	0.755525	0.956068	0.775194	0.950893	0.476077	0.284536	0.860892	0.364583	0.409563	0.87037	0.702128	0.981865
303	0.835821	0.714689	0.824903	0.866667	0.649123	0.532213	0.60262	0.873239	0.608209	0.646091	0.823834	0.863071	0.664835	0.703941	0.572332	0.635012	0.655691	0.638642	0.667072	0.712162	0.569347	0.749286	0.715505	0.748656	0.806982	0.910819	0.586538	0.572626	0.527344	0.545139	0.792869	0.643339	0.934328	0.914875	0.868662	0.982889	0.681676	0.755525	0.956068	0.775194	0.950893	0.476077	0.270103	0.858268	0.364583	0.428274	0.87037	0.702128	0.987047
304	0.835821	0.714689	0.828794	0.866667	0.649123	0.535014	0.60262	0.873239	0.608209	0.646091	0.823834	0.86722	0.665751	0.704858	0.572332	0.633361	0.652869	0.637025	0.667072	0.718919	0.576884	0.749286	0.716216	0.756048	0.815195	0.912281	0.586538	0.583799	0.511719	0.5625	0.811545	0.636594	0.935572	0.914158	0.856292	0.979111	0.682974	0.755525	0.959447	0.775194	0.950893	0.502392	0.263918	0.858268	0.364583	0.411642	0.87037	0.744681	0.989637
305	0.835821	0.714689	0.828794	0.87037	0.652632	0.535014	0.60262	0.873239	0.604478	0.646091	0.823834	0.86722	0.67033	0.698442	0.573123	0.631709	0.693321	0.630558	0.668894	0.722297	0.58191	0.753571	0.715505	0.756048	0.819302	0.918129	0.591346	0.592179	0.523438	0.524306	0.872666	0.631535	0.938557	0.916547	0.761759	0.981778	0.679944	0.755525	0.949309	0.736434	0.950893	0.519139	0.280412	0.858268	0.364583	0.295218	0.87037	0.744681	0.997409
306	0.835821	0.711864	0.824903	0.866667	0.649123	0.532213	0.598253	0.868545	0.600746	0.641975	0.818653	0.863071	0.673077	0.703941	0.56996	0.625103	0.644403	0.630558	0.665857	0.720946	0.575879	0.745	0.709104	0.754704	0.790554	0.921053	0.586538	0.558659	0.527344	0.565972	0.852292	0.634907	0.940547	0.921803	0.83934	0.989889	0.679835	0.755525	0.94255	0.72093	0.950893	0.523923	0.282474	0.858268	0.364583	0.195426	0.888889	0.744681	0.997409
307	0.828358	0.706215	0.817121	0.881481	0.649123	0.532213	0.58952	0.86385	0.597015	0.63786	0.813472	0.858921	0.671245	0.703941	0.567589	0.625103	0.639699	0.627324	0.664034	0.709459	0.570352	0.742143	0.700569	0.762769	0.7577	0.903509	0.581731	0.558659	0.554688	0.534722	0.862479	0.63575	0.94403	0.924192	0.855757	0.988222	0.690551	0.755525	0.935791	0.713178	0.950893	0.533493	0.263918	0.858268	0.364583	0.120582	0.87037	0.723404	0.948187
308	0.824627	0.70339	0.81323	0.859259	0.642105	0.526611	0.585153	0.859155	0.593284	0.62963	0.829016	0.854772	0.664835	0.698442	0.56917	0.615194	0.638758	0.638642	0.662211	0.707432	0.575879	0.743571	0.706259	0.762769	0.76386	0.926901	0.572115	0.544693	0.535156	0.506944	0.818336	0.645868	0.943532	0.929925	0.845144	0.977778	0.686005	0.755525	0.935791	0.713178	0.950893	0.533493	0.245361	0.858268	0.364583	0.024948	0.87037	0.744681	0.96114
309	0.820896	0.700565	0.81323	0.859259	0.642105	0.526611	0.585153	0.859155	0.593284	0.62963	0.829016	0.854772	0.664835	0.700275	0.608696	0.617671	0.635936	0.630558	0.661604	0.702703	0.575377	0.742143	0.704836	0.762769	0.770021	0.912281	0	0.561453	0.550781	0.524306	0.816638	0.642496	0.944279	0.928731	0.847434	0.978778	0.686871	0.755525	0.935791	0.72093	0.950893	0.574163	0.224742	0.858268	0.364583	0.0519751	0.888889	0.744681	0.96114
310	0.817164	0.69774	0.809339	0.885185	0.635088	0.52381	0.580786	0.85446	0.589552	0.625514	0.797927	0.850622	0.664835	0.694775	0.56996	0.626755	0.643462	0.627324	0.662211	0.697297	0.578894	0.753571	0.703414	0.758737	0.776181	0.99269	0.567308	0.578212	0.585938	0.569444	0.847199	0.650084	0.944776	0.930005	0.823076	0.984444	0.692283	0.755525	0.939171	0.713178	0.950893	0.564593	0.247423	0.858268	0.364583	0.035343	0.888889	0.744681	0.968912
311	0.813433	0.69774	0.809339	0.851852	0.635088	0.521008	0.580786	0.849765	0.585821	0.625514	0.797927	0.850622	0.671245	0.702108	0.558893	0.51858	0.619003	0.29426	0.691981	0.765541	0.289447	0.737857	0.388336	0.486559	0.776181	0.921053	0.557692	0.578212	0.582031	0.555556	0.830221	0.650927	0.945522	0.927775	0.846671	0.999444	0.683083	0.755525	0.939171	0.713178	0.950893	0.423445	0.317526	0.858268	0.364583	0.00623701	0.888889	0.723404	0.971503
312	0.813433	0.69774	0.805447	0.851852	0.635088	0.521008	0.576419	0.849765	0.585821	0.625514	0.797927	0.850622	0.673077	0.698442	0.571542	0.626755	0.786453	0.630558	0.662211	0.697297	0.580905	0.754286	0.70697	0.761425	0.780287	0.921053	0.557692	0.567039	0.5625	0.569444	0.792869	0.6543	0.946517	0.929686	0.840562	0.979444	0.681676	0.755525	0.939171	0.713178	0.950893	0.648325	0.276289	0.858268	0.364583	0.027027	0.888889	0.723404	0.971503
313	0.843284	0.621469	0.914397	0.9	0.712281	0.901961	0.943231	0.793427	0.86194	0.90535	0.725389	0.763485	0.636447	0.67736	0.576285	0.533443	0.645343	0.611964	0.696841	0.766216	0.403015	0.72	0.751067	0.74328	0.774127	0.897661	0.543269	0.614525	0.625	0.315972	0.718166	0.483137	0.764428	0.92666	0.670586	0.000222222	0.714579	0.719268	0.347775	0.72093	0.122024	0.435407	0.338144	0.839895	0.385417	0.419958	0.87037	0.638298	0.891192
314	0.839552	0.621469	0.914397	0.896296	0.708772	0.89916	0.938865	0.793427	0.865672	0.90535	0.720207	0.759336	0.64011	0.68286	0.580237	0.538398	0.635936	0.613581	0.705954	0.763514	0.408543	0.724286	0.755334	0.731855	0.778234	0.902047	0.543269	0.608939	0.644531	0.381944	0.716469	0.472175	0.762189	0.927934	0.671274	0.000222222	0.721831	0.719268	0.351154	0.728682	0.125	0.425837	0.307216	0.829396	0.385417	0.424116	0.87037	0.638298	0.891192
315	0.835821	0.618644	0.914397	0.888889	0.708772	0.89916	0.938865	0.793427	0.86194	0.901235	0.720207	0.759336	0.645604	0.686526	0.583399	0.538398	0.635936	0.616815	0.703524	0.00337838	0.402513	0.724286	0.754623	0.735887	0.774127	0.896199	0.543269	0.608939	0.652344	0.295139	0.726655	0.450253	0.759701	0.927616	0.666158	0.000222222	0.724537	0.719268	0.354533	0.736434	0.126488	0.416268	0.303093	0.832021	0.385417	0.451143	0.87037	0.638298	0.891192
316	0.83209	0.618644	0.910506	0.885185	0.708772	0.896359	0.938865	0.788732	0.854478	0.901235	0.720207	0.759336	0.651099	0.690192	0.587352	0.546656	0.64158	0.621665	0.699271	0.764865	0.403518	0.725714	0.750356	0.75	0.770021	0.893275	0.543269	0.586592	0.621094	0.34375	0.726655	0.427487	0.760697	0.927058	0.675855	0.000222222	0.733304	0.719268	0.344395	0.728682	0.126488	0.394737	0.286598	0.826772	0.385417	0.43659	0.87037	0.638298	0.88601
317	0.835821	0.618644	0.906615	0.881481	0.705263	0.896359	0.938865	0.788732	0.854478	0.901235	0.720207	0.759336	0.656593	0.699358	0.593676	0.549959	0.647225	0.626516	0.698663	0.764189	0.411558	0.722143	0.741821	0.747984	0.765914	0.893275	0.548077	0.603352	0.640625	0.309028	0.72326	0.444351	0.762189	0.927536	0.667608	0.000222222	0.727243	0.719268	0.330878	0.728682	0.125	0.421053	0.303093	0.826772	0.385417	0.453222	0.87037	0.638298	0.880829
318	0.83209	0.618644	0.906615	0.877778	0.705263	0.893557	0.938865	0.788732	0.854478	0.901235	0.720207	0.759336	0.645604	0.695692	0.588142	0.554913	0.649106	0.626516	0.698663	0.761486	0.407538	0.722857	0.741821	0.749328	0.774127	0.893275	0.596154	0.592179	0.640625	0.34375	0.721562	0.416526	0.762438	0.925944	0.673183	0.000222222	0.727568	0.719268	0.327498	0.72093	0.125	0.409091	0.292784	0.824147	0.385417	0.45738	0.87037	0.638298	0.880829
319	0.83209	0.618644	0.902724	0.862963	0.705263	0.893557	0.938865	0.788732	0.850746	0.901235	0.720207	0.759336	0.645604	0.688359	0.591304	0.574732	0.682973	0.624899	0.697448	0.761486	0.401508	0.718571	0.736842	0.747312	0.761807	0.893275	0.653846	0.567039	0.617188	0.399306	0.730051	0.387858	0.767413	0.929288	0.676542	0.000222222	0.731897	0.719268	0.324119	0.713178	0.122024	0.416268	0.276289	0.824147	0.385417	0.442827	0.87037	0.638298	0.870466
320	0.83209	0.618644	0.902724	0.859259	0.708772	0.896359	0.938865	0.788732	0.847015	0.901235	0.720207	0.759336	0.645604	0.68561	0.589723	0.569777	0.671684	0.623282	0.698056	0.762838	0.403015	0.72	0.733286	0.743952	0.7577	0.890351	0.639423	0.550279	0.597656	0.329861	0.724958	0.353288	0.768905	0.930801	0.666692	0.000222222	0.728217	0.719268	0.320739	0.705426	0.119048	0.440191	0.309278	0.821522	0.385417	0.419958	0.87037	0.638298	0.865285
321	0.83209	0.618644	0.894942	0.862963	0.705263	0.896359	0.938865	0.793427	0.847015	0.901235	0.720207	0.759336	0.607143	1	0.480632	0.493807	0.418627	0.545675	0.698056	0.629054	0.410553	0.696429	0.687767	0.722446	0.778234	0.894737	0.625	0.581006	0.601562	0.451389	0.721562	0.344857	0.767164	0.930403	0.57109	0.000222222	0.567377	0.719268	0.324119	0.713178	0.119048	0.394737	0.280412	0.839895	0.385417	0.18711	0.87037	0.425532	0.823834
322	0.835821	0.621469	0.894942	0.87037	0.708772	0.896359	0.938865	0.798122	0.843284	0.897119	0.720207	0.759336	0.614469	1	0.558103	0.541701	0.592662	0.628133	0.693196	0.730405	0.385427	0.720714	0.753912	0.751344	0.790554	0.928363	0.596154	0.608939	0.65625	0.413194	0.731749	0.0438449	0.765423	0.926023	0.579337	0.000222222	0.573006	0.719268	0.324119	0.713178	0.120536	0.380383	0.305155	0.847769	0.385417	0.110187	0.87037	0.425532	0.823834
323	0.839552	0.624294	0.898833	0.885185	0.712281	0.896359	0.943231	0.807512	0.843284	0.901235	0.725389	0.759336	0.592491	1	0.53913	0.488852	0.481656	0.571544	0.690765	0.761486	0.38995	0.717143	0.743243	0.754704	0.819302	0.926901	0.5625	0.614525	0.609375	0.364583	0.72326	0.58516	0.758706	0.924351	0.618739	0.0515556	0.566728	0.719268	0.334257	0.728682	0.125	0.45933	0.290722	0.813648	0.385417	0.384615	0.87037	0.425532	0.839378
324	0.843284	0.627119	0.902724	0.896296	0.715789	0.89916	0.951965	0.816901	0.847015	0.901235	0.735751	0.763485	0.591575	1	0.549407	0.433526	0.342427	0.544058	0.692588	0.773649	0.414573	0.701429	0.692745	0.747312	0.823409	0.923977	0.591346	0.625698	0.609375	0.385417	0.706282	0.593592	0.755473	0.921007	0.541081	0.0893333	0.579175	0.719268	0.341016	0.744186	0.127976	0.406699	0.298969	0.805774	0.385417	0.101871	0.87037	0.468085	0.84456
325	0.847015	0.632768	0.910506	0.896296	0.719298	0.901961	0.956332	0.826291	0.835821	0.909465	0.751295	0.771784	0.563187	1	0.541502	0.42692	0.279398	0.523848	0.698663	0.652027	0.373367	0.719286	0.684211	0.763441	0.802875	0.907895	0.576923	0.675978	0.730469	0.409722	0.660441	0.557336	0.752488	0.916627	0.490226	0.113778	0.584479	0.719268	0.347775	0.75969	0.126488	0.423445	0.296907	0.7979	0.385417	0.0665281	0.87037	0.468085	0.849741
326	0.854478	0.635593	0.0583658	0.933333	0.722807	0.901961	0.960699	0.830986	0.83209	0.91358	0.761658	0.780083	0.608974	1	0.53834	0.511148	0.472248	0.578011	0.695626	0.594595	0.352764	0.727143	0.753201	0.756048	0.790554	0.902047	0.567308	0.625698	0.628906	0.392361	0.733447	0.544688	0.749751	0.916945	0.612553	0.122	0.632969	0.719268	0.351154	0.767442	0.133929	0.442584	0.307216	0.80315	0.385417	0.536383	0.87037	0.510638	0.854922
327	0.858209	0.635593	0.92607	0.937037	0.726316	0.904762	0.965066	0.830986	0.83209	0.917695	0.772021	0.784232	0.599817	0.544455	0.869565	0.533443	0.439323	0.341148	0.706561	0.662838	0.429146	0.715714	0.739687	0.742608	0.798768	0.907895	0.591346	0.642458	0.632812	0.388889	0.733447	0.573356	0.749005	0.911371	0.620953	0.134444	0.624094	0.719268	0.351154	0.775194	0.133929	0.406699	0.28866	0.808399	0.385417	0.247401	0.851852	0.510638	0.797927
328	0.86194	0.635593	0.945525	0.940741	0.729825	0.904762	0.969432	0.830986	0.873134	0.925926	0.782383	0.788382	0.588828	0.500458	0.0403162	0.548307	0.528692	0.417138	0.704131	0.658108	0.330653	0.725714	0.754623	0.723118	0.798768	0.904971	0.596154	0.597765	0.582031	0.489583	0.73854	0.535413	0.746269	0.910097	0.540012	0.135889	0.634592	0.719268	0.354533	0.775194	0.133929	0.449761	0.303093	0.847769	0.385417	0.205821	0.888889	0.510638	0.782383
329	0.865672	0.635593	0.953307	0.925926	0.733333	0.904762	0.973799	0.830986	0.873134	0.930041	0.792746	0.79668	0.649267	0.643446	0.530435	0.548307	0.632173	0.629749	0.699878	0.710135	0.331658	0.708571	0.748222	0.752016	0.770021	0.899123	0.600962	0.558659	0.535156	0.527778	0.731749	0.505902	0.749254	0.911769	0.679368	0.128667	0.766425	0.719268	0.357913	0.751938	0.130952	0.464115	0.292784	0.824147	0.385417	0.488565	0.87037	0.510638	0.870466
330	0.865672	0.635593	0.949416	0.922222	0.729825	0.904762	0.973799	0.830986	0.884328	0.934156	0.792746	0.79668	0.592491	0.537122	0.4917	0.546656	0.254939	0.56831	0.694411	0.681081	0.347236	0.696429	0.554765	0.561156	0.790554	0.896199	0.634615	0.558659	0.554688	0.4375	0.743633	0.387858	0.753234	0.91161	0.696778	0.0944444	0.61078	0.719268	0.357913	0.736434	0.129464	0.45933	0.303093	0.813648	0.385417	0.758836	0.87037	0.702128	0.901554
331	0.86194	0.629944	0.941634	0.903704	0.726316	0.901961	0.969432	0.821596	0.880597	0.934156	0.787565	0.792531	0.574176	0.507791	0.495652	0.559868	0.21731	0.552142	0.687728	0.726351	0.355779	0.691429	0.512802	0.519489	0.786448	0.890351	0.668269	0.553073	0.5625	0.361111	0.728353	0.370995	0.768905	0.915671	0.625611	0.0835556	0.631778	0.719268	0.351154	0.713178	0.125	0.473684	0.34433	0.813648	0.385417	0.796258	0.87037	0.468085	0.906736
332	0.854478	0.624294	0.933852	0.922222	0.715789	0.89916	0.965066	0.816901	0.880597	0.930041	0.777202	0.788382	0.585165	0.592117	0.470356	0.538398	0.161806	0.245756	0.684083	0.752027	0.367337	0.727857	0.740398	0.500672	0.794661	0.896199	0.596154	0.575419	0.589844	0.336806	0.726655	0.487352	0.756716	0.915114	0.667227	0.0642222	0.599632	0.719268	0.341016	0.705426	0.125	0.466507	0.282474	0.816273	0.385417	0.490644	0.87037	0.446809	0.917098
333	0.854478	0.624294	0.933852	0.922222	0.715789	0.89916	0.965066	0.816901	0.880597	0.930041	0.777202	0.788382	0.0503663	0.538955	0.379447	0.526837	0.566322	0.0800323	0.68712	0.752027	0.371859	0.727143	0.743243	0.476478	0.798768	0.897661	0.620192	0.564246	0.574219	0.0590278	0.7691	0.0978078	0.75796	0.91153	0.556582	0.06	0.599199	0.719268	0.341016	0.705426	0.125	0.461722	0.323711	0.821522	0.385417	0.0769231	0.87037	0.446809	0.917098
334	0.850746	0.621469	0.933852	0.940741	0.712281	0.901961	0.965066	0.807512	0.873134	0.930041	0.772021	0.788382	0.57967	0.59945	0.483794	0.519405	0.609595	0.260307	0.690765	0.758108	0.28392	0.736429	0.743243	0.486559	0.790554	0.899123	0.543269	0.614525	0.65625	0.395833	0.743633	0.0430017	0.757214	0.918379	0.65142	0.000222222	0.570625	0.719268	0.354533	0.705426	0.127976	0.430622	0.268041	0.818898	0.385417	0.195426	0.87037	0.425532	0.92228
335	0.850746	0.621469	0.933852	0.944444	0.712281	0.89916	0.965066	0.807512	0.854478	0.930041	0.772021	0.784232	0.522894	0.551787	0.349407	0.473163	0.590781	0.0291027	0.693196	0.757432	0.28392	0.724286	0.477952	0.463038	0.794661	0.897661	0.533654	0.620112	0.664062	0.423611	0.752122	0.383642	0.765423	0.918379	0.58537	0.000222222	0.571057	0.719268	0.351154	0.736434	0.127976	0.476077	0.317526	0.824147	0.385417	0.27027	0.87037	0.425532	0.92228
336	0.847015	0.621469	0.929961	0.933333	0.712281	0.89916	0.960699	0.807512	0.824627	0.930041	0.772021	0.784232	0.618132	0.632447	0.516206	0.521883	0.64158	0.409863	0.701701	0.722973	0.339698	0.752857	0.737553	0.665323	0.802875	0.890351	0.509615	0.620112	0.65625	0.46875	0.711375	0.454469	0.757463	0.918697	0.664936	0.0506667	0.65992	0.719268	0.337636	0.736434	0.126488	0.45933	0.280412	0.818898	0.385417	0.492723	0.87037	0.553191	0.906736
337	0.843284	0.618644	0.922179	0.914815	0.708772	0.893557	0.956332	0.802817	0.854478	0.930041	0.766839	0.784232	0.643773	0.656279	0.545455	0.545004	0.643462	0.502021	0.707776	0.765541	0.40603	0.745	0.743243	0.75672	0.774127	0.891813	0.5625	0.620112	0.679688	0.451389	0.709677	0.46543	0.757214	0.921405	0.61515	0.000222222	0.71826	0.719268	0.334257	0.736434	0.127976	0.409091	0.270103	0.824147	0.385417	0.378378	0.87037	0.617021	0.891192
338	0.843284	0.615819	0.918288	0.907407	0.705263	0.890756	0.956332	0.802817	0.891791	0.925926	0.766839	0.780083	0.645604	0.662695	0.550198	0.546656	0.643462	0.502021	0.701094	0.770946	0.403518	0.708571	0.73542	0.767473	0.774127	0.894737	0.557692	0.614525	0.660156	0.427083	0.718166	0.483137	0.757463	0.918299	0.65226	0.000222222	0.719234	0.719268	0.334257	0.736434	0.127976	0.401914	0.290722	0.834646	0.395833	0.419958	0.87037	0.617021	0.891192
339	0.843284	0.612994	0.914397	0.896296	0.701754	0.890756	0.956332	0.802817	0.895522	0.925926	0.761658	0.780083	0.649267	0.662695	0.546245	0.563171	0.667921	0.508488	0.698663	0.764865	0.396482	0.714286	0.748933	0.739919	0.770021	0.888889	0.629808	0.603352	0.65625	0.340278	0.713073	0.48145	0.760199	0.920369	0.63737	0.000222222	0.723888	0.719268	0.334257	0.736434	0.127976	0.397129	0.268041	0.839895	0.395833	0.449064	0.87037	0.638298	0.893782
340	0.839552	0.612994	0.910506	0.881481	0.701754	0.890756	0.951965	0.802817	0.891791	0.925926	0.761658	0.780083	0.651099	0.664528	0.55415	0.586292	0.688617	0.510105	0.696233	0.772297	0.395477	0.717857	0.756046	0.760081	0.774127	0.888889	0.663462	0.575419	0.636719	0.444444	0.721562	0.500843	0.762189	0.920847	0.642028	0.000222222	0.725187	0.719268	0.334257	0.728682	0.125	0.435407	0.272165	0.863517	0.395833	0.438669	0.87037	0.638298	0.880829
341	0.839552	0.615819	0.906615	0.877778	0.701754	0.890756	0.951965	0.802817	0.891791	0.925926	0.766839	0.780083	0.654762	0.668194	0.554941	0.582989	0.690499	0.514956	0.691981	0.760135	0.397487	0.712857	0.742532	0.747312	0.774127	0.888889	0.668269	0.567039	0.597656	0.496528	0.721562	0.509275	0.762935	0.919812	0.642257	0.000222222	0.723455	0.719268	0.31736	0.705426	0.123512	0.42823	0.263918	0.866142	0.385417	0.469854	0.87037	0.638298	0.875648
342	0.839552	0.618644	0.906615	0.881481	0.701754	0.887955	0.951965	0.802817	0.884328	0.921811	0.766839	0.775934	0.65293	0.670027	0.55336	0.568126	0.681091	0.519806	0.700486	0.757432	0.402513	0.717143	0.740398	0.747312	0.770021	0.888889	0.663462	0.567039	0.597656	0.420139	0.728353	0.512648	0.765174	0.921484	0.643937	0.000222222	0.612945	0.719268	0.31736	0.697674	0.120536	0.38756	0.274227	0.847769	0.395833	0.376299	0.87037	0.617021	0.875648
343	0.835821	0.615819	0.902724	0.874074	0.701754	0.882353	0.947598	0.798122	0.880597	0.921811	0.761658	0.771784	0.651099	0.670944	0.555731	0.569777	0.662277	0.516572	0.704739	0.760811	0.392965	0.727857	0.743954	0.756048	0.770021	0.888889	0.673077	0.586592	0.585938	0.520833	0.719864	0.504216	0.768159	0.924988	0.645235	0.000222222	0.694231	0.719268	0.313981	0.689922	0.119048	0.416268	0.243299	0.858268	0.395833	0.45738	0.87037	0.531915	0.870466
344	0.835821	0.615819	0.902724	0.877778	0.701754	0.882353	0.951965	0.793427	0.880597	0.921811	0.756477	0.771784	0.654762	0.675527	0.555731	0.574732	0.684854	0.531124	0.710207	0.758784	0.398995	0.722143	0.741821	0.758737	0.761807	0.887427	0.682692	0.592179	0.644531	0.354167	0.72326	0.494941	0.769154	0.925147	0.60507	0.000222222	0.697262	0.719268	0.310601	0.689922	0.120536	0.411483	0.284536	0.845144	0.395833	0.39501	0.87037	0.617021	0.870466
345	0.83209	0.612994	0.902724	0.881481	0.701754	0.887955	0.947598	0.788732	0.735075	0.917695	0.756477	0.771784	0.528388	0.623281	0.529644	0.533443	0.617121	0.552142	0.667679	0.630405	0.332161	0.537857	0.546942	0.573925	0.741273	1	0.620192	0.530726	0.511719	0.333333	0.112054	0.118044	0.769652	0.925625	0.609728	0	0	0.719268	0.307222	0.682171	0.119048	0.62201	0.373196	0.296588	0.0520833	0.671518	0.0740741	0	0.813472
346	0.820896	0.610169	0.906615	0.948148	0.698246	0.882353	0.956332	0.784038	0.828358	0.917695	0.751295	0.763485	0.524725	0.575619	0.4917	0.490504	0.557855	0.505255	0.589915	0.542568	0.251256	0.42	0.463727	0.475806	0.823409	0.820175	0.586538	0.645251	0.714844	0.246528	0.106961	0.155143	0.766418	0.929368	0.677764	0	0.00032471	0.719268	0.31736	0.658915	0.11756	0.698565	0.435052	0.314961	0.0520833	0.912682	0.0555556	0.106383	0.740933
347	0.813433	0.774011	0.906615	0.959259	0.691228	0.879552	0.951965	0.769953	0.794776	0.917695	0.746114	0.763485	0.508242	0.555454	0.475889	0.474814	0.539981	0.482619	0.557716	0.508108	0.228643	0.387857	0.438122	0.445565	0.823409	0.807018	0.572115	0.642458	0.6875	0.1875	0.0254669	0.214165	0.764925	0.929686	0.698839	0	0.00032471	0.719268	0.283566	0.682171	0.119048	0.69378	0.441237	0.312336	0.0520833	0.945946	0.037037	0.106383	0.647668
348	0.802239	0.59887	0.902724	0.974074	0.684211	0.87395	0.951965	0.769953	0.768657	0.91358	0.735751	0.759336	0.488095	0.541705	0.452174	0.445087	0.5381	0.4519	0.515796	0.468243	0.203015	0.344286	0.403272	0.409946	0.802875	0.792398	0.543269	0.636872	0.699219	0.163194	0.0203735	0.177909	0.762438	0.933668	0.727169	0	0.00032471	0.575276	0.273428	0.697674	0.119048	0.73445	0.42268	0.272966	0.0520833	1	0.0555556	0.106383	0.564767
349	0.794776	0.590395	0.894942	0.981481	0.673684	0.865546	0.947598	0.765258	0.761194	0.909465	0.725389	0.751037	0.500916	0.533456	0.451383	0.444261	0.539981	0.471302	0.489064	0.445946	0.238693	0.321429	0.386913	0.388441	0.806982	0.78655	0.543269	0.561453	0.542969	0.135417	0.00237691	0.13575	0.768408	0.932951	0.543754	0	0.00032471	0.575276	0.26329	0.635659	0.114583	0.696172	0.418557	0.283465	0.0520833	0.613306	0.0555556	0.106383	0.497409
350	0.787313	0.579096	0.891051	0.981481	0.670175	0.865546	0.947598	0.760563	0.753731	0.909465	0.720207	0.746888	0.491758	0.526123	0.447431	0.436829	0.536218	0.463217	0.472661	0.431081	0.237688	0.306429	0.376245	0.374328	0.794661	0.77924	0.548077	0.561453	0.542969	0.128472	0.00186757	0.128162	0.769403	0.936057	0.461744	0	0.00032471	0.575276	0.266669	0.573643	0.111607	0.703349	0.387629	0.288714	0.0520833	0.615385	0.0555556	0.106383	0.46114
351	0.783582	0.576271	0.883268	0.977778	0.663158	0.859944	0.938865	0.751174	0.742537	0.901235	0.709845	0.738589	0.484432	0.515124	0.437154	0.42692	0.526811	0.448666	0.45079	0.412838	0.229146	0.286429	0.285917	0.354839	0.790554	0.77193	0.524038	0.558659	0.363281	0.111111	0.00186757	0.129005	0.770647	0.936057	0.388286	0	0.00032471	0.575276	0.293704	0.589147	0.104167	0.720096	0.412371	0.341207	0.0520833	0.638254	0.0555556	0.106383	0.409326
352	0.776119	0.562147	0.875486	0.977778	0.65614	0.854342	0.938865	0.741784	0.731343	0.901235	0.704663	0.738589	0.466117	0.493126	0.419763	0.407927	0.4873	0.430073	0.434994	0.397973	0.231658	0.272143	0.327881	0.343414	0.786448	0.77193	0.519231	0.597765	0.667969	0.0868056	0.00186757	0.133221	0.768159	0.935738	0.341784	0	0.00032471	0.575276	0.297084	0.658915	0.104167	0.705742	0.435052	0.286089	0.0520833	0.565489	0.0740741	0.106383	0.373057
353	0.761194	0.559322	0.863813	0.985185	0.642105	0.843137	0.930131	0.7277	0.712687	0.888889	0.689119	0.726141	0.418498	0.436297	0.372332	0.364988	0.421449	0.378335	0.407655	0.374324	0.222613	0.243571	0.297297	0.326613	0.811088	0.770468	0.432692	0.645251	0.726562	0.0590278	0.00288625	0.167791	0.762687	0.937649	0.21037	0	0.000432947	0.143646	0.334257	0.651163	0.113095	0.677033	0.43299	0.330709	0.0520833	0.503119	0.0555556	0	0.310881
354	0.757463	0.545198	0.856031	0.985185	0.631579	0.840336	0.930131	0.723005	0.708955	0.888889	0.678756	0.726141	0.402015	0.416132	0.358103	0.360033	0.429915	0.345998	0.389429	0.335135	0.220603	0.228571	0.27596	0.304435	0.778234	0.770468	0.519231	0.653631	0.765625	0.0555556	0.00169779	0.127319	0.769154	0.942985	0.125153	0	0	0.143646	0.354533	0.728682	0.119048	0.643541	0.356701	0.275591	0.0520833	0.509356	0	0	0.30829
355	0.738806	0.533898	0.836576	0.974074	0.614035	0.829132	0.917031	0.699531	0.682836	0.872428	0.65285	0.709544	0.367216	0.374885	0.321739	0.318745	0.382879	0.310428	0.36695	0.320946	0.213065	0.21	0.256046	0.293011	0.798768	0.76462	1	0.653631	0.765625	0.0416667	0.00169779	0.127319	0.769154	0.942109	0.0695632	0	0	0.143646	0.371431	0.790698	0.111607	0.660287	0.420619	0.270341	0.0520833	0.463617	0	0	0.30829
356	0.723881	0.522599	0.824903	0.97037	0.596491	0.820728	0.908297	0.685446	0.671642	0.864198	0.637306	0.701245	0.339744	0.343721	0.294862	0.285714	0.347131	0.282134	0.349939	0.306757	0.205025	0.192857	0.250356	0.280914	0.786448	0.770468	0.471154	0.726257	0.929688	0.0347222	0.00169779	0.129005	0.769154	0.950549	0.0565058	0	0	0.143646	0.371431	0.813953	0.119048	0.672249	0.428866	0.265092	0.0520833	0.465696	0	0	0.30829
357	0.712687	0.514124	0.809339	0.959259	0.57193	0.815126	0.90393	0.671362	0.656716	0.855967	0.621762	0.692946	0.317766	0.31989	0.273518	0.269199	0.318909	0.25384	0.334751	0.297297	0.19799	0.18	0.243954	0.269489	0.811088	0.766082	0.456731	0.731844	0.933594	0.0329861	0.00169779	0.131535	0.760448	0.951983	0.0454337	0	0	0.208564	0.368051	0.821705	0.123512	0.645933	0.389691	0.288714	0.0520833	0.451143	0	0	0.202073
358	0.701493	0.508475	0.801556	0.959259	0.564912	0.806723	0.895197	0.661972	0.645522	0.847737	0.611399	0.684647	0.299451	0.299725	0.257708	0.251032	0.296331	0.228779	0.323815	0.289189	0.188945	0.167857	0.233286	0.259409	0.778234	0.758772	0.456731	0.72067	0.902344	0.0302083	0.00169779	0.130691	0.7699	0.895843	0.0374924	0	0	0.208564	0.361292	0.79845	0.122024	0.641148	0.397938	0.301837	0.0520833	0.580042	0	0	0.186528
359	0.69403	0.50565	0.789883	0.951852	0.550877	0.80112	0.89083	0.661972	0.634328	0.843621	0.611399	0.684647	0.274725	0.252979	0.226877	0.213047	0.254939	0.170574	0.309842	0.272973	0.170352	0.155714	0.214083	0.244624	0.798768	0.75	0.456731	0.726257	0.902344	0.0263889	0.0730051	0.140809	0.772637	0.897914	0.0352016	0	0	0.208564	0.357913	0.790698	0.122024	0.638756	0.385567	0.275591	0.0520833	0.586279	0	0	0.165803
360	0.686567	0.483051	0.774319	0.940741	0.547368	0.787115	0.868996	0.657277	0.615672	0.839506	0.585492	0.680498	0.271062	0.240147	0.222134	0.198183	0.248354	0.160065	0.308627	0.272297	0.160804	0.149286	0.204836	0.239919	0.786448	0.732456	0.456731	0.740223	0.902344	0.028125	0.0696095	0.145868	0.770896	0.896719	0.0352016	0	0	0.208564	0.361292	0.790698	0.120536	0.641148	0.385567	0.265092	0.0520833	0.588358	0	0	0.163212
361	0.809701	0.694915	0.805447	0.851852	0.631579	0.521008	0.576419	0.849765	0.585821	0.625514	0.797927	0.850622	0.668498	0.698442	0.570751	0.625103	0.766698	0.628941	0.660996	0.697297	0.586432	0.754286	0.690612	0.764113	0.770021	0.918129	0.552885	0.572626	0.574219	0.565972	0.814941	0.624789	0.947264	0.930881	0.891265	0.959556	0.68265	0.755525	0.935791	0.72093	0.950893	0.5	0.263918	0.858268	0.364583	0.363825	0.888889	0.723404	0.968912
362	0.80597	0.694915	0.801556	0.848148	0.631579	0.518207	0.576419	0.849765	0.585821	0.621399	0.792746	0.846473	0.67033	0.698442	0.573913	0.626755	0.775165	0.632175	0.660996	0.712162	0.576884	0.754286	0.709815	0.764113	0.772074	0.903509	0.552885	0.561453	0.582031	0.559028	0.872666	0.663575	0.947264	0.931916	0.83934	1	0.683732	0.755525	0.935791	0.713178	0.950893	0.485646	0.270103	0.858268	0.364583	0.336798	0.87037	0.723404	0.948187
363	0.80597	0.69209	0.801556	0.844444	0.62807	0.515406	0.572052	0.840376	0.58209	0.617284	0.792746	0.846473	0.668498	0.698442	0.572332	0.620149	0.662277	0.635408	0.667679	0.722973	0.573367	0.752857	0.694879	0.765457	0.741273	0.899123	0.548077	0.567039	0.605469	0.527778	0.870968	0.682968	0.949005	0.938286	0.8708	1	0.687629	0.755525	0.935791	0.72093	0.950893	0.509569	0.261856	0.895013	0.375	0.266112	0.888889	0.723404	0.937824
364	0.802239	0.689266	0.797665	0.844444	0.62807	0.515406	0.567686	0.840376	0.58209	0.596708	0.787565	0.842324	0.673077	0.700275	0.571542	0.620149	0.661336	0.630558	0.665857	0.72973	0.574372	0.745	0.694168	0.760081	0.741273	0.897661	0.548077	0.544693	0.59375	0.555556	0.877759	0.726813	0.949254	0.933827	0.858659	1	0.685789	0.755525	0.932412	0.72093	0.950893	0.526316	0.220619	0.895013	0.375	0.378378	0.87037	0.723404	0.935233
365	0.798507	0.686441	0.793774	0.844444	0.624561	0.512605	0.567686	0.840376	0.578358	0.596708	0.751295	0.842324	0.664835	0.694775	0.572332	0.620149	0.658514	0.632175	0.665857	0.731081	0.574372	0.740714	0.702703	0.750672	0.747433	0.906433	0.543269	0.561453	0.59375	0.53125	0.898132	0.727656	0.948507	0.932951	0.890501	1	0.68633	0.755525	0.932412	0.72093	0.950893	0.497608	0.261856	0.895013	0.375	0.316008	0.888889	0.723404	0.940415
366	0.794776	0.686441	0.793774	0.840741	0.624561	0.509804	0.567686	0.835681	0.578358	0.613169	0.782383	0.842324	0.67033	0.696609	0.56996	0.626755	0.66698	0.635408	0.664642	0.730405	0.568844	0.735714	0.697724	0.744624	0.75154	0.912281	0.543269	0.567039	0.605469	0.548611	0.894737	0.736931	0.950746	0.937888	0.833232	1	0.687845	0.755525	0.925653	0.728682	0.950893	0.523923	0.278351	0.895013	0.375	0.276507	0.888889	0.723404	0.940415
367	0.794776	0.683616	0.789883	0.840741	0.624561	0.509804	0.563319	0.835681	0.574627	0.613169	0.782383	0.842324	0.673077	0.705775	0.570751	0.626755	0.667921	0.635408	0.664642	0.72973	0.573869	0.749286	0.710526	0.757392	0.749487	0.918129	0.538462	0.583799	0.617188	0.520833	0.893039	0.753794	0.950995	0.935579	0.839035	1	0.687737	0.755525	0.925653	0.736434	0.950893	0.535885	0.265979	0.897638	0.375	0.278586	0.888889	0.723404	0.943005
368	0.794776	0.683616	0.789883	0.837037	0.624561	0.509804	0.563319	0.830986	0.574627	0.609053	0.782383	0.842324	0.671245	0.700275	0.570751	0.625103	0.66698	0.633791	0.665857	0.731081	0.580905	0.756429	0.714794	0.761425	0.747433	0.918129	0.538462	0.561453	0.609375	0.5	0.89983	0.714165	0.952985	0.937172	0.861714	1	0.739149	0.755525	0.932412	0.744186	0.950893	0.545455	0.270103	0.897638	0.375	0.361746	0.888889	0.723404	0.948187
369	0.791045	0.680791	0.785992	0.833333	0.621053	0.509804	0.558952	0.826291	0.570896	0.604938	0.772021	0.838174	0.665751	0.692942	0.570751	0.630058	0.663217	0.630558	0.668287	0.735135	0.584422	0.751429	0.709815	0.764785	0.753593	0.921053	0.533654	0.583799	0.621094	0.493056	0.896435	0.729342	0.951493	0.942109	0.849801	1	0.683516	0.755525	0.932412	0.744186	0.950893	0.466507	0.261856	0.897638	0.375	0.232848	0.892593	0.702128	0.950777
370	0.791045	0.677966	0.785992	0.833333	0.621053	0.509804	0.558952	0.830986	0.570896	0.609053	0.777202	0.842324	0.665751	0.700275	0.577075	0.630058	0.664158	0.635408	0.668287	0.737838	0.578894	0.760714	0.716216	0.764113	0.747433	0.918129	0.533654	0.572626	0.617188	0.552083	0.913413	0.731029	0.949005	0.939162	0.838348	1	0.681459	0.755525	0.932412	0.744186	0.950893	0.476077	0.25567	0.897638	0.375	0.22869	0.892593	0.702128	0.950777
371	0.794776	0.680791	0.789883	0.833333	0.624561	0.509804	0.558952	0.835681	0.570896	0.609053	0.777202	0.842324	0.668498	0.698442	0.578656	0.626755	0.670743	0.638642	0.670109	0.741892	0.580402	0.766429	0.715505	0.766801	0.774127	0.918129	0.538462	0.583799	0.628906	0.545139	0.993209	0.708263	0.944776	0.936057	0.835217	1	0.68016	0.755525	0.932412	0.751938	0.950893	0.452153	0.224742	0.897638	0.375	0.230769	0.883333	0.702128	0.953368
372	0.794776	0.683616	0.789883	0.833333	0.624561	0.512605	0.563319	0.835681	0.570896	0.613169	0.782383	0.842324	0.675824	0.703941	0.573913	0.625103	0.665099	0.637025	0.667072	0.739865	0.575879	0.725	0.715505	0.765457	0.743326	0.921053	0.538462	0.578212	0.605469	0.586806	0.950764	0.671164	0.944279	0.936296	0.859728	1	0.679835	0.755525	0.932412	0.751938	0.950893	0.413876	0.257732	0.897638	0.375	0.326403	0.883333	0.702128	0.953368
373	0.794776	0.683616	0.789883	0.837037	0.624561	0.512605	0.563319	0.835681	0.570896	0.62963	0.772021	0.842324	0.675824	0.703941	0.570751	0.625103	0.662277	0.635408	0.665857	0.741216	0.574874	0.755714	0.709815	0.758737	0.737166	0.910819	0.538462	0.594972	0.648438	0.527778	0.898132	0.70489	0.946269	0.936455	0.855987	1	0.688711	0.755525	0.935791	0.736434	0.950893	0.394737	0.272165	0.897638	0.375	0.245322	0.883333	0.723404	0.937824
374	0.794776	0.683616	0.789883	0.837037	0.624561	0.515406	0.563319	0.835681	0.570896	0.609053	0.782383	0.842324	0.673077	0.702108	0.56996	0.626755	0.659454	0.637025	0.665249	0.743243	0.575879	0.760714	0.711238	0.760081	0.73306	0.916667	0.533654	0.589385	0.648438	0.541667	0.903226	0.708263	0.946269	0.934942	0.85927	1	0.688603	0.755525	0.94255	0.744186	0.950893	0.380383	0.253608	0.897638	0.375	0.268191	0.883333	0.723404	0.932642
375	0.794776	0.683616	0.789883	0.837037	0.624561	0.512605	0.563319	0.835681	0.570896	0.609053	0.782383	0.842324	0.675824	0.703941	0.56996	0.593724	0.659454	0.638642	0.663426	0.740541	0.574874	0.759286	0.700569	0.754704	0.737166	0.907895	0.533654	0.572626	0.617188	0.506944	0.904924	0.698988	0.946269	0.938207	0.86767	1	0.690118	0.755525	0.94593	0.736434	0.950893	0.373206	0.235052	0.897638	0.375	0.272349	0.883333	0.723404	0.932642
376	0.794776	0.680791	0.789883	0.837037	0.624561	0.512605	0.563319	0.835681	0.570896	0.609053	0.782383	0.842324	0.673077	0.704858	0.572332	0.623452	0.680151	0.598222	0.663426	0.741216	0.575879	0.756429	0.70697	0.754704	0.737166	0.907895	0.538462	0.572626	0.621094	0.541667	0.874363	0.680438	0.945522	0.932075	0.857437	1	0.690226	0.755525	0.935791	0.744186	0.950893	0.397129	0.208247	0.897638	0.375	0.309771	0.883333	0.723404	0.932642
377	0.798507	0.683616	0.789883	0.837037	0.624561	0.515406	0.567686	0.840376	0.570896	0.613169	0.782383	0.842324	0.675824	0.704858	0.61581	0.626755	0.662277	0.643492	0.667072	0.746622	0.569347	0.755	0.696302	0.754032	0.743326	0.903509	0.543269	0.592179	0.636719	0.548611	0.896435	0.704047	0.946269	0.930721	0.840791	1	0.684381	0.755525	0.932412	0.744186	0.950893	0.406699	0.247423	0.897638	0.375	0.280665	0.883333	0.723404	0.937824
378	0.794776	0.680791	0.789883	0.837037	0.624561	0.512605	0.563319	0.835681	0.567164	0.609053	0.782383	0.842324	0.678571	0.71494	0.574704	0.630058	0.664158	0.643492	0.660996	0.741216	0.568844	0.756429	0.70697	0.74328	0.714579	0.900585	0.533654	0.561453	0.632812	0.576389	0.879457	0.674536	0.954229	0.941233	0.847969	1	0.69304	0.755525	0.939171	0.744186	0.950893	0.509569	0.268041	0.897638	0.375	0.139293	0.87037	0.723404	0.92228
379	0.791045	0.677966	0.77821	0.833333	0.621053	0.509804	0.558952	0.835681	0.559701	0.600823	0.772021	0.838174	0.677656	0.711274	0.576285	0.628406	0.66698	0.643492	0.664642	0.739865	0.568844	0.757857	0.696302	0.742608	0.718686	0.903509	0.524038	0.555866	0.617188	0.673611	0.870968	0.683811	0.952985	0.942029	0.843922	1	0.693365	0.755525	0.935791	0.751938	0.950893	0.507177	0.220619	0.908136	0.375	0.0893971	0.888889	0.723404	0.911917
380	0.791045	0.672316	0.774319	0.82963	0.617544	0.507003	0.554585	0.830986	0.55597	0.596708	0.766839	0.834025	0.678571	0.711274	0.577866	0.631709	0.667921	0.643492	0.665857	0.738514	0.572864	0.75	0.70697	0.739919	0.685832	0.915205	0.519231	0.561453	0.636719	0.534722	0.879457	0.674536	0.953234	0.943144	0.861332	1	0.691742	0.755525	0.939171	0.736434	0.950893	0.38756	0.253608	0.902887	0.385417	0.155925	0.888889	0.723404	0.911917
381	0.787313	0.672316	0.774319	0.82963	0.614035	0.507003	0.554585	0.830986	0.55597	0.596708	0.766839	0.834025	0.678571	0.71494	0.579447	0.635012	0.665099	0.645109	0.667072	0.737162	0.567337	0.75	0.719061	0.737903	0.685832	0.913743	0.519231	0.550279	0.609375	0.53125	0.894737	0.615514	0.953731	0.942985	0.86828	1	0.693798	0.755525	0.94255	0.728682	0.950893	0.368421	0.249485	0.87664	0.385417	0.218295	0.888889	0.723404	0.917098
382	0.787313	0.672316	0.770428	0.82963	0.614035	0.507003	0.554585	0.830986	0.55597	0.596708	0.766839	0.834025	0.678571	0.71494	0.581028	0.631709	0.668862	0.643492	0.667679	0.740541	0.574874	0.752857	0.721195	0.739919	0.685832	0.918129	0.519231	0.550279	0.621094	0.583333	0.89983	0.624789	0.953483	0.943622	0.856597	1	0.692824	0.755525	0.939171	0.736434	0.950893	0.363636	0.253608	0.908136	0.375	0.251559	0.888889	0.702128	0.914508
383	0.787313	0.672316	0.770428	0.82963	0.614035	0.507003	0.554585	0.830986	0.55597	0.596708	0.766839	0.829876	0.678571	0.71494	0.581028	0.635012	0.66698	0.646726	0.670717	0.742568	0.571357	0.752143	0.724751	0.741935	0.726899	0.918129	0.524038	0.547486	0.59375	0.513889	0.89983	0.629005	0.954726	0.941949	0.85507	1	0.690876	0.755525	0.939171	0.736434	0.950893	0.363636	0.208247	0.929134	0.385417	0.195426	0.888889	0.702128	0.919689
384	0.787313	0.672316	0.774319	0.833333	0.614035	0.509804	0.558952	0.835681	0.559701	0.592593	0.772021	0.834025	0.678571	0.711274	0.578656	0.631709	0.66698	0.644301	0.670109	0.740541	0.566834	0.75	0.724751	0.739247	0.685832	0.913743	0.519231	0.550279	0.617188	0.53125	0.879457	0.61973	0.953731	0.943462	0.831933	1	0.690876	0.755525	0.94255	0.736434	0.950893	0.363636	0.249485	0.908136	0.385417	0.22869	0.888889	0.702128	0.911917
385	0.66791	0.491525	0.766537	0.937037	0.536842	0.781513	0.877729	0.633803	0.597015	0.82716	0.585492	0.672199	0.21337	0.207149	0.189723	0.171759	0.206021	0.115602	0.28068	0.263514	0.139698	0.126429	0.178521	0.219758	0.765914	0.725146	0.403846	0.748603	0.941406	0.0243056	0.0848896	0.132378	0.772388	0.902851	0.441814	0.000333333	0.00032471	0.158149	0.347775	0.782946	0.122024	0.645933	0.381443	0.296588	0.0625	0.735967	0.0740741	0.106383	0.150259
386	0.652985	0.483051	0.750973	0.937037	0.522807	0.770308	0.868996	0.624413	0.58209	0.81893	0.569948	0.6639	0.196886	0.188818	0.177075	0.156069	0.189087	0.104285	0.26853	0.253378	0.132161	0.114286	0.164296	0.208333	0.7577	0.71345	0.399038	0.731844	0.929688	0.0243056	0.0865874	0.132378	0.750249	0.906116	0.45869	0.000333333	0.00032471	0.158149	0.341016	0.775194	0.122024	0.662679	0.364948	0.296588	0.0625	0.746362	0.0740741	0.106383	0.139896
387	0.641791	0.474576	0.7393	0.922222	0.512281	0.764706	0.864629	0.615023	0.58209	0.8107	0.564767	0.655602	0.191392	0.181485	0.168379	0.148637	0.177799	0.0978173	0.255164	0.247973	0.130653	0.107143	0.15505	0.202957	0.74538	0.704678	0.394231	0.731844	0.933594	0.0243056	0.0865874	0.132378	0.750746	0.906275	0.454184	0.000333333	0.00032471	0.158149	0.341016	0.775194	0.119048	0.655502	0.36701	0.291339	0.0625	0.748441	0.0740741	0	0.139896
388	0.623134	0.460452	0.719844	0.911111	0.498246	0.753501	0.855895	0.600939	0.552239	0.798354	0.549223	0.647303	0.178571	0.164986	0.154941	0.137903	0.170273	0.09135	0.235723	0.237162	0.125628	0.0957143	0.130156	0.0584677	0.73306	0.688596	0.365385	0.726257	0.921875	0.0243056	0.0831919	0.129005	0.772139	0.909301	0.451665	0.000333333	0.00032471	0.158149	0.347775	0.75969	0.119048	0.643541	0.375258	0.307087	0.0625	0.731809	0.0740741	0	0.134715
389	0.604478	0.449153	0.7393	0.896296	0.484211	0.745098	0.842795	0.586854	0.533582	0.786008	0.533679	0.634855	1	0.152154	0.145455	0.12469	0.157103	0.0848828	0.221142	0.225	0.119095	0.085	0.112376	0.0510753	0.720739	0.682749	0.365385	0.703911	0.910156	0.0243056	0.0848896	0.129848	0.772388	0.912008	0.455864	0.000333333	0.00032471	0.158149	0.334257	0.75969	0.119048	0.65311	0.395876	0.270341	0.0625	0.744283	0.0740741	0	0.129534
390	0.589552	0.440678	0.684825	0.877778	0.470175	0.733894	0.838428	0.577465	0.522388	0.777778	0.523316	0.630705	1	0.144821	0.136759	0.118084	0.147695	0.0784155	0.208384	0.218243	0.115075	0.0785714	0.098862	0.178091	0.720739	0.669591	0.331731	0.731844	0.9375	0.0243056	0.0831919	0.129848	0.773383	0.914397	0.456781	0.000333333	0.00032471	0.158149	0.330878	0.751938	0.116071	0.667464	0.439175	0.286089	0.0625	0.744283	0.0740741	0	0.129534
391	0.574627	0.429379	0.66537	0.87037	0.45614	0.728291	0.829694	0.56338	0.507463	0.765432	0.512953	0.622407	1	0.135655	0.0505929	0.109827	0.138288	0.0735651	0.197448	0.209459	0.110553	0.0714286	0.0903272	0.168683	0.712526	0.659357	0.331731	0.72067	0.925781	0.0243056	0.0814941	0.133221	0.772886	0.915512	0.459377	0.000333333	0.00032471	0.158149	0.324119	0.736434	0.119048	0.598086	0.414433	0.28084	0.0625	0.681913	0.0740741	0	0.124352
392	0.563433	0.423729	0.653696	0.866667	0.449123	0.722689	0.825328	0.558685	0.5	0.761317	0.512953	0.614108	1	0.130156	0.124111	0.104872	0.132643	0.0719483	0.191981	0.20473	0.109548	0.0678571	0.0860597	0.165323	0.708419	0.657895	0.326923	0.72067	0.933594	0.0208333	0.0848896	0.133221	0.772886	0.922201	0.4396	0.000333333	0.00032471	0.158149	0.320739	0.728682	0.119048	0.645933	0.412371	0.278215	0.0625	0.765073	0.0740741	0	0.124352
393	0.541045	0.412429	0.63035	0.840741	0.442105	0.705882	0.816594	0.544601	0.477612	0.744856	0.497409	0.605809	1	0.12099	0.113043	0.0933113	0.117592	0.0646726	0	0.19527	0.101508	0.0607143	0.0775249	0.155914	0.700205	0.653509	0.235577	0.977654	0.9375	0.0208333	0.0831919	0.13828	0.770149	0.918697	0.0494044	0.000333333	0.00032471	0.151243	0.320739	0.736434	0.110119	0.657895	0.412371	0.288714	0.0520833	0.802495	0.0740741	0	0.124352
394	0.529851	0.403955	0.614786	0.822222	0.442105	0.70028	0.80786	0.539906	0.470149	0.736626	0.492228	0.59751	1	0.113657	0.106719	0.0900083	0.106303	0.0622474	0.169502	0.189189	0.0979899	0.0578571	0.0697013	0.150538	0.691992	0.644737	0.216346	0.73743	0.992188	0.0243056	0.0848896	0.137437	0.767164	0.919334	0.538332	0.000333333	0.00032471	0.151243	0.324119	0.744186	0.110119	0.662679	0.414433	0.270341	0.0520833	0.81289	0.0740741	0	0.126943
395	0.518657	0.39548	0.603113	0.807407	0.417544	0.691877	0.799127	0.530516	0.458955	0.728395	0.487047	0.593361	1	0.100825	0.104348	0.076796	0.0893697	0.0565885	0.157351	0.183784	0.0964824	0.0492857	0.0704125	0.146505	0.675565	0.631579	0.274038	0.986034	0.984375	0.0277778	0.0865874	0.137437	0.762189	0.918379	0.555131	0.000333333	0.00032471	0.287638	0.31736	0.75969	0.116071	0.650718	0.412371	0.291339	0.0520833	0.910603	0.0740741	0.0638298	0.129534
396	0.507463	0.389831	0.583658	0.792593	0.407018	0.683473	0.79476	0.525822	0.458955	0.728395	0.481865	0.589212	1	0.0879927	0.0980237	0.0701899	0.0780809	0.0541633	0.150668	0.178378	0.0964824	0.0428571	0.0654339	0.141801	0.671458	0.619883	0.293269	0.994413	1	0.0347222	0.0865874	0.141653	0.759701	0.920608	0.565822	0.000333333	0.00032471	0.287638	0.310601	0.775194	0.122024	0.691388	0.4	0.304462	0.0520833	0.846154	0.0555556	0.106383	0.129534
397	0.496269	0.381356	0.571984	0.777778	0.4	0.67507	0.790393	0.516432	0.440299	0.716049	0.476684	0.585062	1	0.0834097	0.0916996	0.0619323	0.074318	0.0517381	0.144593	0.175	0.0964824	0.04	0.059744	0.134409	0.663244	0.611111	0.259615	1	0.996094	0.0347222	0.0747029	0.134907	0.75995	0.917264	0.353467	0.001	0.00032471	0.287638	0.303842	0.775194	0.119048	0.677033	0.414433	0.270341	0.0520833	0.623701	0.0555556	0.106383	0.129534
398	0.485075	0.378531	0.564202	0.759259	0.392982	0.663866	0.786026	0.516432	0.429104	0.707819	0.471503	0.580913	1	0.0834097	0.0869565	0.0602808	0.0667921	0.047696	0.14034	0.167568	0.0964824	0.0371429	0.0526316	0.122312	0.650924	0.599415	0.240385	0.675978	0.910156	0.0381944	0.0882852	0.140809	0.758955	0.916706	0.573381	0	0.000216474	0.287638	0.293704	0.75969	0.11756	0.617225	0.408247	0.28084	0.0520833	0.871102	0.037037	0	0.129534
399	0.473881	0.372881	0.564202	0.740741	0.382456	0.641457	0.772926	0.507042	0.421642	0.699588	0.466321	0.576763	1	0.0806599	0.083004	0.0569777	0.0649106	0.0452708	0.13305	0.162838	0.0964824	0.0364286	0.0668563	0.122312	0.646817	0.583333	0.201923	0.684358	0.917969	0.0416667	0.0882852	0.141653	0.760199	0.91806	0.568112	0	0.000216474	0.287638	0.297084	0.751938	0.116071	0.660287	0.414433	0.309711	0.0520833	0.879418	0.037037	0	0.129534
400	0.466418	0.372881	0.536965	0.72963	0.378947	0.644258	0.768559	0.502347	0.391791	0.695473	0.46114	0.572614	1	0.071494	0.0806324	0.0487201	0.0611477	0.0452708	0.13062	0.158784	0.0964824	0.0314286	0.0426743	0.114247	0.63039	0.568713	0.216346	0.684358	0.960938	0.0416667	0.0848896	0.140809	0.756716	0.917264	0.511454	0	0.000216474	0.287638	0.297084	0.75969	0.114583	0.629187	0.414433	0.299213	0.0520833	0.825364	0.037037	0	0.103627
401	0.447761	0.355932	0.513619	0.711111	0.364912	0.635854	0.759825	0.492958	0.395522	0.683128	0.450777	0.560166	1	0.071494	0.0711462	0.0470685	0.0592662	0.0452708	0.119077	0.150676	0.0964824	0.0257143	0.0327169	0.107527	0.601643	0.538012	0.182692	0.689944	0.960938	0.0416667	0.0764007	0.137437	0.760199	0.918857	0.16715	0	0.00032471	0.287638	0.297084	0.767442	0.113095	0.650718	0.410309	0.270341	0.0520833	0.611227	0.037037	0	0.134715
402	0.440299	0.350282	0.498054	0.692593	0.357895	0.62465	0.755459	0.483568	0.384328	0.674897	0.445596	0.556017	1	0.0696609	0.0687747	0.0470685	0.0592662	0.0428456	0.112394	0.14527	0.0964824	0.0192857	0.027027	0.104839	0.581109	0.519006	0.201923	0.636872	0.835938	0.0381944	0.0764007	0.124789	0.765174	0.918697	0.0575748	0	0.00032471	0.287638	0.280187	0.72093	0.105655	0.645933	0.393814	0.314961	0.0520833	0.617464	0.037037	0	0.134715
403	0.429104	0.344633	0.490272	0.674074	0.350877	0.613445	0.746725	0.474178	0.376866	0.662551	0.435233	0.547718	1	0.0678277	0.0671937	0.0470685	0.0573848	0.0404204	0.108748	0.141216	0.0964824	0.00928571	0.0220484	0.0967742	0.556468	0.498538	0.192308	0.611732	0.816406	0.0381944	0.0764007	0.128162	0.766169	0.923236	0.0470373	0	0.000216474	0.287638	0.266669	0.682171	0.102679	0.638756	0.393814	0.309711	0.0520833	0.621622	0.037037	0	0.134715
404	0.414179	0.333333	0.470817	0.651852	0.336842	0.605042	0.737991	0.464789	0.365672	0.62963	0.430052	0.539419	1	0.0659945	0.0640316	0.045417	0.0555033	0.0388036	0.103281	0.135811	0.0964824	0.0128571	0.0177809	0.094086	0.548255	0.472222	0.177885	0.592179	0.792969	0.0381944	0.0764007	0.134907	0.767662	0.923873	0.0352016	0	0.00032471	0.244475	0.256531	0.643411	0.0952381	0.61244	0.393814	0.275591	0.0520833	0.627859	0.037037	0	0.132124
405	0.406716	0.316384	0.459144	0.637037	0.329825	0.596639	0.751092	0.460094	0.354478	0.646091	0.419689	0.53112	1	0.0641613	0.0624506	0.0520231	0.0536218	0.0388036	0.0941677	0.133108	0.0964824	0.0107143	0.0163585	0.0873656	0.540041	0.47807	0.168269	0.589385	0.796875	0.0381944	0.0764007	0.134907	0.768408	0.926262	0.0219151	0	0.00032471	0.244475	0.249772	0.620155	0.107143	0.629187	0.404124	0.293963	0.0520833	0.621622	0.0555556	0	0.129534
406	0.395522	0.322034	0.420233	0.618519	0.322807	0.568627	0.724891	0.450704	0.343284	0.633745	0.414508	0.526971	1	0.0623281	0.0616601	0.0520231	0.0536218	0.0379951	0.0874848	0.127027	0.0964824	0.00571429	0.0113798	0.0853495	0.533881	0.466374	0.163462	0.594972	0.804688	0.0381944	0.0747029	0.134064	0.770398	0.927138	0.0323763	0	0.00032471	0.223066	0.246392	0.612403	0.0892857	0.624402	0.393814	0.291339	0.0520833	0.613306	0.0555556	0.106383	0.129534
407	0.38806	0.319209	0.439689	0.611111	0.319298	0.579832	0.724891	0.446009	0.339552	0.62963	0.409326	0.522822	1	0.060495	0.0592885	0.0520231	0.0517404	0.0379951	0.0868773	0.124324	0.0964824	0.00285714	0.00426743	0.0819892	0.527721	0.460526	0.168269	0.597765	0.804688	0.0381944	0.0764007	0.134064	0.770896	0.927775	0.032529	0	0.00032471	0.223066	0.246392	0.604651	0.0892857	0.605263	0.402062	0.299213	0.0520833	0.598753	0.0555556	0.106383	0.124352
408	0.384328	0.313559	0.431907	0.6	0.312281	0.571429	0.720524	0.441315	0.33209	0.625514	0.404145	0.518672	1	0.060495	0.0577075	0.0520231	0.0489182	0.0355699	0.0832321	0.121622	0.0994975	0.00142857	0	0.0819892	0.519507	0.454678	0.168269	0.606145	0.808594	0.0381944	0.0747029	0.140809	0.770896	0.930801	0.0203115	0	0.00032471	0.223066	0.249772	0.596899	0.0892857	0.605263	0.391753	0.296588	0.0520833	0.588358	0.0555556	0.106383	0.124352
409	0.787313	0.669492	0.770428	0.82963	0.614035	0.507003	0.554585	0.835681	0.552239	0.596708	0.766839	0.829876	0.684066	0.71494	0.579447	0.631709	0.669802	0.646726	0.676185	0.747297	0.581407	0.760714	0.70128	0.741935	0.741273	0.921053	0.524038	0.550279	0.59375	0.520833	0.904924	0.679595	0.953731	0.941392	0.990073	1	0.71826	0.755525	0.949309	0.736434	0.950893	0.368421	0.251546	0.897638	0.385417	0.12474	0.888889	0.702128	0.927461
410	0.791045	0.672316	0.770428	0.82963	0.614035	0.507003	0.554585	0.835681	0.55597	0.596708	0.751295	0.829876	0.684066	0.716774	0.581028	0.597853	0.668862	0.646726	0.674362	0.74527	0.577889	0.762857	0.697724	0.739247	0.737166	0.921053	0.524038	0.536313	0.613281	0.545139	0.910017	0.657673	0.952736	0.936455	0.992593	1	0.684923	0.755525	0.94255	0.728682	0.950893	0.385167	0.218557	0.897638	0.385417	0.162162	0.888889	0.702128	0.930052
411	0.791045	0.672316	0.770428	0.82963	0.614035	0.507003	0.554585	0.835681	0.55597	0.596708	0.766839	0.829876	0.68315	0.716774	0.577075	0.630058	0.664158	0.643492	0.673147	0.741216	0.573869	0.756429	0.692745	0.734543	0.73306	0.921053	0.524038	0.544693	0.589844	0.5	0.910017	0.631535	0.952488	0.936534	1	1	0.686113	0.755525	0.94255	0.728682	0.950893	0.366029	0.257732	0.897638	0.385417	0.168399	0.87037	0.702128	0.927461
412	0.791045	0.672316	0.774319	0.833333	0.614035	0.509804	0.554585	0.840376	0.55597	0.596708	0.772021	0.829876	0.684066	0.713107	0.577866	0.626755	0.663217	0.645109	0.671324	0.741216	0.575879	0.755	0.688478	0.733199	0.718686	0.910819	0.528846	0.550279	0.585938	0.527778	0.894737	0.611298	0.952985	0.941631	0.992746	1	0.687845	0.755525	0.935791	0.728682	0.950893	0.430622	0.241237	0.897638	0.385417	0.155925	0.87037	0.702128	0.919689
413	0.794776	0.672316	0.774319	0.833333	0.614035	0.509804	0.554585	0.835681	0.55597	0.596708	0.772021	0.829876	0.678571	0.707608	0.575494	0.625103	0.658514	0.645109	0.668894	0.743919	0.578392	0.753571	0.690612	0.735215	0.726899	0.915205	0.528846	0.578212	0.625	0.541667	0.901528	0.612985	0.952985	0.94402	0.957392	1	0.687304	0.755525	0.935791	0.713178	0.950893	0.447368	0.263918	0.897638	0.385417	0.168399	0.87037	0.702128	0.870466
414	0.794776	0.672316	0.774319	0.833333	0.614035	0.509804	0.554585	0.840376	0.541045	0.596708	0.772021	0.829876	0.675824	0.707608	0.573123	0.620149	0.651929	0.640259	0.671932	0.749324	0.575879	0.761429	0.685633	0.737231	0.73306	0.913743	0.528846	0.583799	0.648438	0.513889	0.89983	0.611298	0.95398	0.939242	0.967929	1	0.68633	0.755525	0.939171	0.728682	0.950893	0.464115	0.263918	0.897638	0.385417	0.002079	0.87037	0.702128	0.919689
415	0.794776	0.672316	0.774319	0.833333	0.614035	0.509804	0.554585	0.840376	0.55597	0.596708	0.772021	0.829876	0.677656	0.709441	0.572332	0.620149	0.654751	0.63945	0.673147	0.747973	0.575879	0.764286	0.687055	0.731855	0.737166	0.918129	0.528846	0.578212	0.644531	0.527778	0.881154	0.610455	0.952239	0.944418	0.963882	1	0.688061	0.755525	0.94255	0.736434	0.950893	0.406699	0.263918	0.897638	0.385417	0.12474	0.87037	0.702128	0.92487
416	0.794776	0.672316	0.770428	0.833333	0.614035	0.509804	0.554585	0.840376	0.552239	0.596708	0.772021	0.829876	0.680403	0.713107	0.573913	0.623452	0.656632	0.646726	0.673147	0.746622	0.575879	0.766429	0.6899	0.729839	0.726899	0.918129	0.528846	0.567039	0.761719	0.541667	0.881154	0.652614	0.953731	0.941153	0.94548	1	0.686979	0.755525	0.949309	0.736434	0.950893	0.356459	0.257732	0.897638	0.385417	0.143451	0.87037	0.702128	0.927461
417	0.794776	0.672316	0.770428	0.82963	0.614035	0.509804	0.558952	0.840376	0.552239	0.596708	0.772021	0.829876	0.684066	0.711274	0.577075	0.628406	0.662277	0.648343	0.673147	0.743243	0.576884	0.755714	0.694168	0.748656	0.743326	0.918129	0.533654	0.583799	0.640625	0.513889	0.887946	0.747049	0.950249	0.940835	0.867517	1	0.690659	0.755525	0.952688	0.736434	0.950893	0.397129	0.214433	0.897638	0.385417	0.212058	0.883333	0.702128	0.930052
418	0.798507	0.672316	0.774319	0.833333	0.614035	0.512605	0.563319	0.840376	0.55597	0.600823	0.772021	0.834025	0.685897	0.72319	0.581028	0.628406	0.664158	0.653193	0.671932	0.744595	0.574874	0.757857	0.699858	0.761425	0.743326	0.918129	0.533654	0.567039	0.621094	0.489583	0.88455	0.744519	0.94801	0.938446	0.839722	1	0.682974	0.755525	0.962827	0.744186	0.950893	0.354067	0.259794	0.897638	0.385417	0.266112	0.883333	0.702128	0.935233
419	0.802239	0.677966	0.77821	0.833333	0.621053	0.518207	0.567686	0.849765	0.559701	0.609053	0.782383	0.838174	0.685897	0.722273	0.58498	0.630058	0.66604	0.65481	0.673755	0.739189	0.577387	0.762143	0.709104	0.772849	0.741273	0.918129	0.543269	0.558659	0.625	0.496528	0.891341	0.736931	0.946269	0.936534	0.863546	1	0.68081	0.755525	0.969585	0.767442	0.950893	0.337321	0.214433	0.897638	0.385417	0.474012	0.892593	0.702128	0.937824
420	0.80597	0.677966	0.782101	0.837037	0.624561	0.521008	0.572052	0.85446	0.563433	0.609053	0.782383	0.842324	0.685897	0.722273	0.587352	0.631709	0.667921	0.65481	0.674362	0.732432	0.578894	0.715	0.747511	0.761425	0.741273	0.915205	0.548077	0.544693	0.617188	0.548611	0.886248	0.710793	0.943035	0.931279	0.902489	1	0.683516	0.755525	0.972965	0.782946	0.950893	0.339713	0.206186	0.897638	0.385417	0.571726	0.883333	0.702128	0.937824
421	0.813433	0.680791	0.785992	0.840741	0.624561	0.52381	0.576419	0.859155	0.567164	0.613169	0.787565	0.850622	0.690476	0.724106	0.586561	0.635012	0.675447	0.653193	0.676185	0.738514	0.580905	0.765	0.708393	0.764785	0.731006	0.907895	0.552885	0.567039	0.632812	0.517361	0.88455	0.677066	0.941045	0.927855	0.844227	1	0.686979	0.755525	0.993241	0.79845	0.950893	0.330144	0.253608	0.897638	0.385417	0.476091	0.883333	0.723404	0.937824
422	0.820896	0.683616	0.793774	0.848148	0.631579	0.526611	0.585153	0.868545	0.567164	0.621399	0.797927	0.850622	0.691392	0.72594	0.586561	0.633361	0.672625	0.658044	0.679222	0.741892	0.582915	0.758571	0.688478	0.766129	0.722793	0.899123	0.557692	0.558659	0.621094	0.534722	0.889643	0.675379	0.942289	0.925307	0.883476	1	0.688278	0.755525	0.993241	0.806202	0.950893	0.308612	0.245361	0.897638	0.385417	0.486486	0.883333	0.723404	0.932642
423	0.820896	0.689266	0.793774	0.848148	0.638596	0.529412	0.585153	0.868545	0.567164	0.625514	0.797927	0.850622	0.693223	0.72044	0.58498	0.631709	0.672625	0.65966	0.683475	0.743243	0.580905	0.751429	0.704125	0.759409	0.714579	0.893275	0.567308	0.567039	0.632812	0.572917	0.886248	0.663575	0.940299	0.923953	0.89913	1	0.690551	0.755525	0.996621	0.821705	0.950893	0.315789	0.243299	0.897638	0.385417	0.474012	0.892593	0.744681	0.919689
424	0.824627	0.689266	0.797665	0.855556	0.642105	0.529412	0.58952	0.868545	0.567164	0.625514	0.803109	0.854772	0.687729	0.722273	0.581028	0.630058	0.663217	0.664511	0.685905	0.745946	0.579899	0.732143	0.709815	0.761425	0.714579	0.932749	0.567308	0.561453	0.625	0.576389	0.894737	0.661889	0.937811	0.925466	0.871258	1	0.688278	0.755525	1	0.821705	0.950893	0.318182	0.251546	0.897638	0.385417	0.471933	0.9	0.723404	0.911917
425	0.828358	0.689266	0.801556	0.855556	0.642105	0.532213	0.58952	0.868545	0.563433	0.625514	0.797927	0.850622	0.691392	0.72044	0.581818	0.628406	0.665099	0.65481	0.688943	0.74527	0.576884	0.765	0.709104	0.75672	0.743326	0.94152	0.567308	0.578212	0.644531	0.517361	0.904924	0.578415	0.939303	0.927695	0.909667	0.959889	0.686113	0.755525	0.996621	0.821705	0.950893	0.325359	0.239175	0.910761	0.40625	0.330561	0.888889	0.723404	0.917098
426	0.828358	0.689266	0.801556	0.855556	0.642105	0.532213	0.58952	0.868545	0.563433	0.625514	0.797927	0.850622	0.691392	0.722273	0.579447	0.626755	0.661336	0.65481	0.680437	0.738514	0.580905	0.755714	0.705548	0.745296	0.747433	0.953216	0.567308	0.572626	0.632812	0.552083	0.904924	0.607083	0.940547	0.929368	0.827276	0.982556	0.686763	0.755525	0.993241	0.813953	0.950893	0.308612	0.214433	0.931759	0.40625	0.365904	0.888889	0.723404	0.945596
427	0.824627	0.689266	0.797665	0.855556	0.642105	0.535014	0.58952	0.868545	0.563433	0.621399	0.797927	0.854772	0.691392	0.718607	0.580237	0.628406	0.660395	0.653193	0.6774	0.744595	0.573367	0.766429	0.705548	0.730511	0.759754	0.95614	0.567308	0.561453	0.609375	0.524306	0.904924	0.617201	0.943781	0.92674	0.860339	0.983333	0.682541	0.755525	0.989862	0.806202	0.950893	0.334928	0.25567	0.910761	0.385417	0.386694	0.833333	0.723404	0.950777
428	0.824627	0.686441	0.797665	0.855556	0.642105	0.535014	0.58952	0.868545	0.563433	0.621399	0.797927	0.850622	0.690476	0.711274	0.579447	0.628406	0.658514	0.65481	0.67497	0.743919	0.571859	0.765714	0.70697	0.728495	0.765914	0.923977	0.5625	0.578212	0.628906	0.538194	0.906621	0.602867	0.943035	0.928333	0.835751	0.984778	0.682974	0.755525	0.986482	0.806202	0.950893	0.344498	0.247423	0.905512	0.395833	0.409563	0.833333	0.723404	0.971503
429	0.824627	0.689266	0.797665	0.851852	0.642105	0.535014	0.58952	0.868545	0.563433	0.621399	0.792746	0.850622	0.690476	0.711274	0.579447	0.630058	0.664158	0.651576	0.673755	0.746622	0.569849	0.77	0.709815	0.728495	0.722793	0.897661	0.5625	0.594972	0.792969	0.513889	0.904924	0.621417	0.991045	0.931836	0.82048	0.985444	0.686005	0.755525	0.989862	0.806202	0.950893	0.368421	0.224742	0.910761	0.40625	0.37422	0.87037	0.723404	0.974093
430	0.824627	0.689266	0.797665	0.851852	0.638596	0.535014	0.58952	0.868545	0.563433	0.621399	0.792746	0.850622	0.690476	0.711274	0.580237	0.625103	0.661336	0.653193	0.67497	0.750676	0.577889	0.745	0.70697	0.723118	0.722793	0.897661	0.5625	0.594972	0.660156	0.545139	0.908319	0.610455	0.943284	0.931677	0.810095	0.977556	0.686005	0.755525	0.986482	0.806202	0.950893	0.339713	0.220619	0.905512	0.395833	0.29106	0.87037	0.723404	0.937824
431	0.820896	0.689266	0.793774	0.851852	0.638596	0.535014	0.58952	0.868545	0.563433	0.621399	0.792746	0.850622	0.691392	0.705775	0.581818	0.575557	0.664158	0.65481	0.676792	0.738514	0.578894	0.768571	0.708393	0.728495	0.731006	0.887427	0.5625	0.589385	0.652344	0.565972	0.898132	0.610455	0.945274	0.931677	0.834071	0.972667	0.686546	0.755525	0.989862	0.806202	0.950893	0.339713	0.23299	0.934383	0.40625	0.288981	0.87037	0.723404	0.92228
432	0.820896	0.686441	0.793774	0.851852	0.638596	0.532213	0.585153	0.868545	0.563433	0.621399	0.792746	0.850622	0.684066	0.703941	0.577866	0.623452	0.659454	0.648343	0.6774	0.737162	0.580905	0.745	0.706259	0.728495	0.743326	0.893275	0.5625	0.589385	0.636719	0.538194	0.898132	0.610455	0.945771	0.929925	0.875382	0.952556	0.686546	0.755525	0.986482	0.806202	0.950893	0.339713	0.25567	0.947507	0.416667	0.309771	0.87037	0.723404	0.919689
433	0.358209	0.29661	0.400778	0.562963	0.294737	0.546218	0.69869	0.41784	0.309701	0.596708	0.378238	0.497925	1	0.0549954	0.0529644	0.0404624	0.0338664	0.0355699	0.0838396	0.110811	0.0964824	0	0.00853485	0.0819892	0.494867	0.428363	0.168269	0.583799	0.828125	0.0277778	0.089983	0.134907	0.773383	0.932234	0.0117593	0	0.00032471	0.223066	0.253151	0.581395	0.0848214	0.590909	0.383505	0.283465	0.0625	0.5842	0.0740741	0.106383	0.119171
434	0.350746	0.293785	0.392996	0.555556	0.287719	0.540616	0.694323	0.413146	0.30597	0.592593	0.378238	0.497925	1	0.0549954	0.0521739	0.0404624	0.0319849	0.0347615	0.0832321	0.110135	0.0964824	0	0.00853485	0.0813172	0.486653	0.421053	0.158654	0.575419	0.832031	0.0243056	0.089983	0.13575	0.331095	0.935499	0.0106139	0	0.00032471	0.223066	0.249772	0.573643	0.0848214	0.588517	0.373196	0.299213	0.0625	0.586279	0.0740741	0.106383	0.119171
435	0.335821	0.285311	0.377432	0.537037	0.277193	0.532213	0.681223	0.399061	0.291045	0.576132	0.362694	0.485477	1	0.0513291	0.0482213	0.0388109	0.0366886	0.0307195	0.0747266	0.100676	0.0964824	0	0.00426743	0.0732527	0.466119	0.402047	0.158654	0.567039	0.824219	0.0243056	0.089983	0.134064	0.775373	0.936296	0.00755956	0	0.00032471	0.223066	0.243013	0.550388	0.0818452	0.583732	0.36701	0.283465	0.0625	0.586279	0.0740741	0.106383	0.119171
436	0.324627	0.276836	0.365759	0.518519	0.270175	0.515406	0.672489	0.394366	0.283582	0.567901	0.357513	0.477178	1	0.0485793	0.0458498	0.0355078	0.0385701	0.0291027	0.0716889	0.0959459	0.0964824	0	0.00426743	0.0658602	0.457906	0.391813	0.153846	0.567039	0.824219	0.0208333	0.0713073	0.134064	0.777612	0.938446	0.00641417	0	0.00032471	0.223066	0.239634	0.534884	0.078869	0.598086	0.373196	0.283465	0.0625	0.557173	0.0740741	0.106383	0.119171
437	0.317164	0.271186	0.354086	0.5	0.263158	0.504202	0.663755	0.384977	0.276119	0.555556	0.352332	0.473029	1	0.0476627	0.0442688	0.0338563	0.0263405	0.0291027	0.0710814	0.0939189	0.0964824	0	0.00426743	0.0692204	0.441478	0.378655	0.153846	0.539106	0.800781	0.0208333	0.0696095	0.134064	0.777363	0.938047	0.00503971	0	0.00032471	0.223066	0.239634	0.534884	0.077381	0.588517	0.373196	0.314961	0.0625	0.546778	0.0740741	0.106383	0.119171
438	0.309701	0.265537	0.342412	0.488889	0.252632	0.492997	0.655022	0.375587	0.268657	0.547325	0.34715	0.46473	1	0.0449129	0.0434783	0.0338563	0.0235183	0.0291027	0.0710814	0.0912162	0.0964824	0	0.00426743	0.0678763	0.429158	0.366959	0.153846	0.539106	0.800781	0.0208333	0.0696095	0.134064	0.776866	0.939959	0.00450519	0	0.00032471	0.223066	0.236254	0.534884	0.077381	0.559809	0.369072	0.293963	0.0625	0.573805	0.0740741	0.106383	0.119171
439	0.302239	0.262712	0.33463	0.477778	0.249123	0.487395	0.646288	0.370892	0.261194	0.539095	0.336788	0.460581	1	0.0439963	0.0426877	0.0338563	0.0216369	0.0291027	0.0680437	0.0891892	0.0964824	0	0.00426743	0.0678763	0.416838	0.356725	0.163462	0.522346	0.792969	0.0208333	0.0696095	0.134907	0.779602	0.941312	0.00397068	0	0.00032471	0.223066	0.232875	0.527132	0.0758929	0.583732	0.37732	0.301837	0.0625	0.567568	0.0740741	0.106383	0.11399
440	0.294776	0.254237	0.322957	0.459259	0.238596	0.47619	0.637555	0.361502	0.253731	0.526749	0.331606	0.452282	1	0.0412466	0.0395257	0.0355078	0.0216369	0.0274859	0.0680437	0.0837838	0.0964824	0	0.00426743	0.063172	0.404517	0.343567	0.177885	0.522346	0.78125	0.0138889	0.0696095	0.134907	0.781343	0.945453	0.00320709	0	0.00032471	0.223066	0.229495	0.51938	0.0744048	0.576555	0.375258	0.275591	0.0625	0.571726	0.0740741	0.106383	0.11399
441	0.283582	0.248588	0.311284	0.440741	0.231579	0.462185	0.624454	0.356808	0.246269	0.514403	0.321244	0.443983	1	0.0394134	0.0387352	0.0322048	0.0150517	0.0274859	0.0656136	0.0797297	0.0964824	0	0.00426743	0.0692204	0.392197	0.331871	0.0961538	0.53352	0.800781	0.0173611	0.0696095	0.139123	0.774378	0.943223	0.0020617	0	0.00032471	0.223066	0.232875	0.534884	0.077381	0.636364	0.381443	0.265092	0.0625	0.525988	0.0740741	0	0.11399
442	0.279851	0.245763	0.303502	0.425926	0.22807	0.456583	0.620087	0.356808	0.246269	0.510288	0.326425	0.439834	1	0.0375802	0.0363636	0.0338563	0.0122295	0.025869	0.0607533	0.0668919	0.0964824	0	0.00426743	0.061828	0.379877	0.321637	0.125	0.51676	0.765625	0.0208333	0.0696095	0.13575	0.771891	0.945453	0.00145082	0	0.00032471	0.223066	0.243013	0.565891	0.0818452	0.624402	0.371134	0.270341	0.0625	0.569647	0.0555556	0	0.11399
443	0.276119	0.245763	0.299611	0.414815	0.22807	0.448179	0.615721	0.352113	0.242537	0.510288	0.326425	0.439834	1	0.0366636	0.0355731	0.0371594	0.014111	0.025869	0.0650061	0.0668919	0.0964824	0	0.00426743	0.063172	0.367556	0.314327	0.139423	0.51676	0.753906	0.0277778	0.0696095	0.13575	0.771642	0.942825	0.007865	0	0.00032471	0.223066	0.239634	0.55814	0.0818452	0.686603	0.296907	0.283465	0.0625	0.56341	0.0555556	0	0.108808
444	0.268657	0.240113	0.291829	0.403704	0.221053	0.439776	0.606987	0.352113	0.238806	0.497942	0.321244	0.435685	1	0.0366636	0.0347826	0.0305533	0.014111	0.025869	0.0656136	0.072973	0.0964824	0	0.00426743	0.0658602	0.365503	0.307018	0.149038	0.505587	0.8125	0.0347222	0.0696095	0.136594	0.764925	0.942746	0.00901038	0	0.00032471	0.223066	0.243013	0.55814	0.0833333	0.643541	0.375258	0.267717	0.0625	0.561331	0.037037	0	0.108808
445	0.264925	0.237288	0.287938	0.396296	0.217544	0.431373	0.598253	0.347418	0.235075	0.489712	0.321244	0.431535	1	0.0320807	0.0339921	0.0322048	0.00658514	0.0291027	0.0625759	0.0641892	0.0964824	0	0.00426743	0.0678763	0.355236	0.299708	0.153846	0.505587	0.777344	0.0381944	0.0696095	0.137437	0.767413	0.93972	0.00404704	0	0.00032471	0.223066	0.239634	0.550388	0.0818452	0.741627	0.383505	0.293963	0.0625	0.49896	0.037037	0	0.108808
446	0.257463	0.234463	0.280156	0.388889	0.217544	0.422969	0.593886	0.347418	0.231343	0.481481	0.316062	0.431535	1	0.0320807	0.0332016	0.0322048	0.0028222	0.0291027	0.0631835	0.0641892	0.0964824	0	0.00426743	0.0672043	0.355236	0.298246	0.158654	0.511173	0.730469	0.0416667	0.0662139	0.139123	0.76592	0.93749	0.00213806	0	0.00032471	0.223066	0.236254	0.55814	0.077381	0.672249	0.385567	0.272966	0.0625	0.494802	0.037037	0	0.103627
447	0.253731	0.231638	0.276265	0.374074	0.214035	0.411765	0.585153	0.342723	0.231343	0.473251	0.316062	0.427386	1	0.0311641	0.0316206	0.0272502	0	0.0291027	0.0631835	0.0648649	0.0964824	0	0.00426743	0.0645161	0.347023	0.290936	0.149038	0.488827	0.777344	0.0416667	0.0679117	0.141653	0.764179	0.938047	0.00878131	0	0.00032471	0.223066	0.232875	0.55814	0.0744048	0.650718	0.37732	0.267717	0.0625	0.598753	0.0185185	0	0.103627
448	0.25	0.228814	0.272374	0.366667	0.210526	0.406162	0.580786	0.338028	0.227612	0.469136	0.316062	0.423237	1	0.0311641	0.03083	0.0272502	0.00752587	0.0274859	0.0656136	0.0689189	0.0763819	0	0.00426743	0.0591398	0.347023	0.289474	0.149038	0.505587	0.753906	0.0416667	0.089983	0.140809	0.764179	0.937968	0.00503971	0	0.00032471	0.15366	0.226116	0.534884	0.0729167	0.667464	0.36701	0.267717	0.0625	0.546778	0.0185185	0	0.103627
449	0.242537	0.223164	0.264591	0.359259	0.203509	0.394958	0.576419	0.333333	0.220149	0.460905	0.305699	0.419087	1	0.0293309	0.03083	0.0289017	0.0122295	0.025869	0.0631835	0.0675676	0.0964824	0	0.00426743	0.0591398	0.338809	0.283626	0.168269	0.460894	0.808594	0.0416667	0.0865874	0.139966	0.769652	0.938844	0.0054215	0	0.000216474	0.15366	0.215978	0.511628	0.0729167	0.614833	0.385567	0.272966	0.0625	0.490644	0.0185185	0	0.0984456
450	0.238806	0.217514	0.256809	0.348148	0.203509	0.386555	0.563319	0.323944	0.212687	0.452675	0.300518	0.410788	1	0.0293309	0.029249	0.0322048	0.0159925	0.0242522	0.0607533	0.0648649	0.0964824	0	0.00426743	0.0591398	0.334702	0.27924	0.177885	0.449721	0.714844	0.0381944	0.0713073	0.139123	0.772388	0.940197	0.00251985	0	0.000216474	0.15366	0.20584	0.496124	0.0699405	0.61244	0.364948	0.275591	0.0625	0.446985	0.0185185	0	0.0984456
451	0.227612	0.214689	0.249027	0.337037	0.192982	0.37535	0.554585	0.314554	0.208955	0.440329	0.290155	0.406639	1	0.0311641	0.0300395	0.0355078	0.0178739	0.0226354	0.0607533	0.0635135	0.0964824	0	0.00426743	0.0591398	0.330595	0.274854	0.1875	0.438547	0.691406	0.0381944	0.0696095	0.139123	0.773881	0.942746	0.00160354	0	0.00032471	0.15366	0.199081	0.472868	0.0699405	0.626794	0.364948	0.283465	0.0520833	0.459459	0.037037	0.106383	0.0984456
452	0.220149	0.20904	0.241245	0.325926	0.185965	0.366947	0.545852	0.309859	0.205224	0.403292	0.284974	0.39834	1	0.0311641	0.0300395	0.0338563	0.0159925	0.0226354	0.0607533	0.0594595	0.0964824	0	0.00426743	0.0591398	0.330595	0.277778	0.182692	0.455307	0.664062	0.0347222	0.0696095	0.13828	0.774378	0.944179	0.00099267	0	0.00032471	0.15366	0.199081	0.457364	0.0684524	0.617225	0.356701	0.304462	0.0520833	0.463617	0.037037	0.106383	0.0932642
453	0.212687	0.20339	0.233463	0.318519	0.178947	0.358543	0.537118	0.300469	0.197761	0.423868	0.279793	0.390041	1	0.0339138	0.0300395	0.0338563	0.014111	0.0412288	0.0607533	0.0581081	0.0964824	0	0.00426743	0.0591398	0.330595	0.27193	0.158654	0.438547	0.707031	0.0347222	0.0645161	0.13828	0.775622	0.944338	0.000610874	0	0.00032471	0.15366	0.199081	0.449612	0.0684524	0.65311	0.356701	0.278215	0.0520833	0.463617	0.0555556	0.106383	0.0906736
454	0.208955	0.200565	0.229572	0.311111	0.175439	0.35014	0.528384	0.295775	0.19403	0.415638	0.274611	0.385892	1	0.0339138	0.0316206	0.0272502	0.0103481	0.0242522	0.0607533	0.0567568	0.0964824	0	0.00426743	0.0591398	0.332649	0.260234	0.120192	0.480447	0.644531	0.0347222	0.0628183	0.139123	0.774627	0.946886	0.000381796	0	0.00032471	0.15366	0.199081	0.449612	0.0684524	0.65311	0.356701	0.304462	0.0520833	0.463617	0.0555556	0.106383	0.0880829
455	0.201493	0.194915	0.22179	0.3	0.168421	0.338936	0.519651	0.29108	0.190299	0.415638	0.26943	0.377593	1	0.0339138	0.03083	0.0272502	0.0178739	0.0210186	0.0607533	0.0540541	0.0964824	0	0.00426743	0.0591398	0.322382	0.232456	0.129808	0.511173	0.753906	0.03125	0.0611205	0.139966	0.777114	0.946409	0.000381796	0	0.00032471	0.15366	0.199081	0.44186	0.0684524	0.65311	0.356701	0.278215	0.0520833	0.463617	0.0555556	0.106383	0.0880829
456	0.201493	0.19209	0.217899	0.296296	0.164912	0.336134	0.515284	0.286385	0.186567	0.403292	0.264249	0.373444	1	0.0320807	0.0300395	0.0255987	0.0178739	0.0210186	0.0607533	0.0540541	0.0964824	0	0.00426743	0.0591398	0.285421	0.232456	0.129808	0.511173	0.714844	0.03125	0.0628183	0.139966	0.776368	0.946409	0.000381796	0	0.00032471	0.15366	0.192322	0.434109	0.0684524	0.65311	0.356701	0.278215	0.0520833	0.463617	0.0555556	0.106383	0.0880829
457	0.817164	0.686441	0.789883	0.840741	0.631579	0.529412	0.580786	0.86385	0.563433	0.609053	0.782383	0.842324	0.684066	0.707608	0.575494	0.6218	0.659454	0.64996	0.665857	0.727703	0.573367	0.765	0.700569	0.726478	0.755647	0.923977	0.552885	0.583799	0.636719	0.517361	0.91511	0.599494	0.950995	0.938605	0.854612	0.961889	0.680593	0.755525	0.972965	0.930233	0.950893	0.308612	0.247423	0.947507	0.416667	0.434511	0.888889	0.723404	0.958549
458	0.817164	0.683616	0.785992	0.840741	0.62807	0.529412	0.580786	0.859155	0.559701	0.609053	0.782383	0.842324	0.685897	0.711274	0.578656	0.626755	0.662277	0.64996	0.662211	0.725676	0.576884	0.762143	0.699147	0.723118	0.759754	0.926901	0.552885	0.594972	0.644531	0.548611	0.918506	0.60371	0.951244	0.938286	0.85087	0.972778	0.680052	0.755525	0.976344	0.922481	0.950893	0.440191	0.251546	0.950131	0.416667	0.430353	0.888889	0.723404	0.958549
459	0.813433	0.683616	0.782101	0.837037	0.624561	0.526611	0.576419	0.859155	0.55597	0.609053	0.777202	0.842324	0.687729	0.71494	0.581028	0.631709	0.667921	0.653193	0.660389	0.721622	0.576382	0.761429	0.704125	0.721774	0.770021	0.929825	0.548077	0.578212	0.613281	0.590278	0.920204	0.606239	0.95199	0.94394	0.8427	0.979556	0.677021	0.755525	0.635024	0.767442	0.950893	0.342105	0.214433	0.950131	0.416667	0.444906	0.888889	0.702128	0.968912
460	0.809701	0.680791	0.782101	0.837037	0.624561	0.526611	0.576419	0.859155	0.55597	0.609053	0.777202	0.842324	0.694139	0.71494	0.582609	0.631709	0.667921	0.65481	0.667679	0.72027	0.579899	0.738571	0.704125	0.72043	0.770021	0.929825	0.548077	0.606145	0.660156	0.552083	0.874363	0.611298	0.952488	0.939401	0.82949	0.978111	0.676264	0.755525	0.966206	0.767442	0.950893	0.311005	0.259794	0.950131	0.416667	0.345114	0.888889	0.702128	0.968912
461	0.80597	0.677966	0.782101	0.837037	0.624561	0.52381	0.572052	0.859155	0.55597	0.609053	0.772021	0.838174	0.684982	0.709441	0.581028	0.625103	0.670743	0.653193	0.668287	0.724324	0.58794	0.734286	0.709104	0.728495	0.770021	0.932749	0.543269	0.622905	0.675781	0.538194	0.867572	0.559865	0.950995	0.940994	0.854459	0.923778	0.677454	0.755525	0.956068	0.775194	0.950893	0.313397	0.249485	0.950131	0.416667	0.326403	0.888889	0.702128	0.971503
462	0.80597	0.677966	0.77821	0.833333	0.624561	0.52381	0.572052	0.85446	0.552239	0.604938	0.772021	0.838174	0.687729	0.709441	0.579447	0.628406	0.669802	0.651576	0.662819	0.725	0.586432	0.735714	0.687767	0.724462	0.776181	0.932749	0.543269	0.600559	0.640625	0.555556	0.86927	0.545531	0.952985	0.940357	0.866677	0.909111	0.675614	0.755525	0.952688	0.767442	0.950893	0.342105	0.214433	0.950131	0.416667	0.318087	0.888889	0.702128	0.974093
463	0.802239	0.677966	0.77821	0.82963	0.624561	0.521008	0.572052	0.859155	0.552239	0.604938	0.766839	0.834025	0.695055	0.713107	0.577075	0.630058	0.664158	0.653193	0.660996	0.728378	0.598995	0.755	0.688478	0.728495	0.770021	0.932749	0.538462	0.589385	0.621094	0.583333	0.867572	0.53204	0.953731	0.944577	0.870953	0.906444	0.67648	0.755525	0.949309	0.744186	0.950893	0.327751	0.241237	0.950131	0.416667	0.297297	0.888889	0.702128	0.971503
464	0.802239	0.675141	0.77821	0.82963	0.621053	0.521008	0.567686	0.859155	0.552239	0.600823	0.766839	0.834025	0.695055	0.711274	0.574704	0.631709	0.664158	0.650768	0.668287	0.725676	0.580905	0.763571	0.675676	0.721774	0.767967	0.926901	0.538462	0.594972	0.609375	0.517361	0.867572	0.605396	0.955224	0.947523	0.86515	0.957111	0.675831	0.755525	0.94593	0.751938	0.950893	0.311005	0.263918	0.950131	0.416667	0.384615	0.888889	0.680851	0.971503
465	0.798507	0.675141	0.77821	0.82963	0.621053	0.52381	0.563319	0.849765	0.552239	0.600823	0.766839	0.842324	0.691392	0.707608	0.574704	0.623452	0.656632	0.645109	0.671324	0.722297	0.572864	0.766429	0.706259	0.724462	0.776181	0.923977	0.538462	0.600559	0.609375	0.534722	0.860781	0.598651	0.95199	0.938764	0.827428	0.959111	0.674532	0.755525	0.952688	0.775194	0.950893	0.334928	0.214433	0.934383	0.395833	0.417879	0.888889	0.680851	0.971503
466	0.802239	0.675141	0.782101	0.82963	0.624561	0.526611	0.572052	0.849765	0.55597	0.609053	0.772021	0.842324	0.685897	0.707608	0.575494	0.626755	0.655691	0.645109	0.670109	0.716216	0.570352	0.763571	0.714794	0.725806	0.761807	0.923977	0.543269	0.555866	0.582031	0.496528	0.872666	0.600337	0.946517	0.938605	0.8427	0.955556	0.675506	0.755525	0.962827	0.790698	0.950893	0.344498	0.25567	0.931759	0.395833	0.52183	0.888889	0.702128	0.966321
467	0.80597	0.677966	0.785992	0.833333	0.631579	0.529412	0.576419	0.859155	0.559701	0.613169	0.782383	0.850622	0.690476	0.711274	0.575494	0.6218	0.656632	0.648343	0.667072	0.716216	0.569347	0.765	0.709104	0.72043	0.755647	0.921053	0.548077	0.586592	0.59375	0.555556	0.979626	0.627319	0.946269	0.930881	0.834377	0.977222	0.678428	0.755525	0.966206	0.782946	0.950893	0.320574	0.210309	0.934383	0.395833	0.607069	0.87037	0.702128	0.955959
468	0.813433	0.680791	0.793774	0.840741	0.635088	0.535014	0.580786	0.859155	0.567164	0.621399	0.787565	0.854772	0.695055	0.707608	0.572332	0.6218	0.654751	0.646726	0.669502	0.728378	0.580905	0.762143	0.70128	0.752016	0.743326	0.915205	0.557692	0.555866	0.582031	0.524306	0.86927	0.640809	0.941045	0.930244	0.838119	1	0.67713	0.755525	0.966206	0.782946	0.950893	0.325359	0.235052	0.934383	0.395833	0.490644	0.87037	0.702128	0.950777
469	0.820896	0.683616	0.801556	0.844444	0.642105	0.540616	0.585153	0.86385	0.570896	0.62963	0.797927	0.858921	0.691392	0.703941	0.573123	0.620149	0.660395	0.646726	0.664642	0.727027	0.577889	0.745	0.694879	0.74664	0.731006	0.906433	0.567308	0.550279	0.585938	0.572917	0.872666	0.645868	0.937313	0.922679	0.856368	0.985111	0.688061	0.755525	0.969585	0.806202	0.950893	0.296651	0.270103	0.947507	0.395833	0.517672	0.888889	0.744681	0.935233
470	0.824627	0.686441	0.809339	0.851852	0.645614	0.543417	0.593886	0.868545	0.574627	0.63786	0.803109	0.863071	0.685897	0.702108	0.571542	0.620149	0.656632	0.645109	0.664034	0.725	0.570854	0.754286	0.716927	0.74328	0.726899	0.897661	0.572115	0.583799	0.636719	0.579861	0.870968	0.661046	0.935821	0.919095	0.871106	0.993556	0.688927	0.755525	0.969585	0.821705	0.950893	0.399522	0.220619	0.947507	0.395833	0.392931	0.87037	0.744681	0.92228
471	0.83209	0.69209	0.817121	0.859259	0.65614	0.546218	0.598253	0.873239	0.578358	0.646091	0.813472	0.86722	0.684982	0.700275	0.568379	0.616846	0.65381	0.638642	0.664034	0.724324	0.571859	0.756429	0.691323	0.745296	0.710472	0.887427	0.576923	0.572626	0.628906	0.53125	0.872666	0.655987	0.93806	0.917582	0.850412	0.997333	0.692716	0.755525	0.972965	0.829457	0.950893	0.42823	0.257732	0.947507	0.395833	0.611227	0.87037	0.765957	0.911917
472	0.824627	0.69209	0.821012	0.866667	0.65614	0.546218	0.60262	0.873239	0.58209	0.646091	0.818653	0.863071	0.68315	0.698442	0.567589	0.611891	0.647225	0.637025	0.664642	0.725676	0.568342	0.760714	0.700569	0.736559	0.714579	0.881579	0.576923	0.567039	0.625	0.524306	0.862479	0.682968	0.93806	0.91806	0.855834	0.999778	0.692391	0.755525	0.969585	0.806202	0.950893	0.433014	0.16701	0.947507	0.395833	0.607069	0.87037	0.765957	0.909326
473	0.824627	0.69209	0.817121	0.866667	0.652632	0.543417	0.598253	0.868545	0.574627	0.646091	0.813472	0.863071	0.68315	0.689276	0.567589	0.611891	0.64158	0.633791	0.668894	0.729054	0.575377	0.686429	0.701991	0.733199	0.702259	0.878655	0.572115	0.589385	0.648438	0.5625	0.879457	0.685497	0.940547	0.925864	0.794899	0.993444	0.693798	0.755525	0.959447	0.790698	0.950893	0.27512	0.243299	0.947507	0.395833	0.347193	0.87037	0.768085	0.904145
474	0.817164	0.69209	0.81323	0.87037	0.649123	0.540616	0.58952	0.868545	0.570896	0.641975	0.80829	0.858921	0.678571	0.687443	0.565217	0.605285	0.642521	0.628941	0.671324	0.731757	0.574874	0.757857	0.711949	0.740591	0.726899	0.890351	0.567308	0.594972	0.675781	0.517361	0.879457	0.672007	0.941791	0.930562	0.832086	0.991333	0.692932	0.755525	0.952688	0.782946	0.950893	0.272727	0.245361	0.947507	0.395833	0.345114	0.87037	0.768085	0.917098
475	0.817164	0.683616	0.809339	0.866667	0.652632	0.537815	0.585153	0.86385	0.570896	0.63786	0.803109	0.854772	0.675824	0.691109	0.563636	0.606936	0.633114	0.632175	0.670717	0.732432	0.573869	0.759286	0.714083	0.741935	0.731006	0.907895	0.5625	0.611732	0.699219	0.552083	0.874363	0.666948	0.942786	0.931677	0.837355	0.995333	0.690659	0.755525	0.952688	0.790698	0.950893	0.255981	0.239175	0.947507	0.395833	0.218295	0.881481	0.759574	0.927461
476	0.813433	0.689266	0.805447	0.862963	0.642105	0.535014	0.580786	0.859155	0.567164	0.62963	0.797927	0.854772	0.671245	0.691109	0.566798	0.606936	0.635936	0.628941	0.670109	0.731081	0.571357	0.761429	0.713371	0.734543	0.737166	0.915205	0.552885	0.606145	0.683594	0.510417	0.870968	0.666105	0.944776	0.932633	0.83934	0.996111	0.680485	0.755525	0.952688	0.790698	0.950893	0.248804	0.251546	0.947507	0.395833	0.191268	0.890741	0.731915	0.932642
477	0.813433	0.686441	0.801556	0.859259	0.642105	0.532213	0.576419	0.85446	0.567164	0.62963	0.797927	0.854772	0.671245	0.691109	0.564427	0.606936	0.637817	0.627324	0.671324	0.72973	0.575377	0.765714	0.714083	0.733199	0.743326	0.918129	0.552885	0.617318	0.707031	0.572917	0.874363	0.660202	0.945025	0.93096	0.833766	0.994667	0.685031	0.755525	0.952688	0.790698	0.950893	0.246411	0.245361	0.947507	0.395833	0.27027	0.890741	0.738298	0.937824
478	0.813433	0.686441	0.801556	0.859259	0.642105	0.532213	0.572052	0.859155	0.563433	0.62963	0.797927	0.854772	0.67033	0.691109	0.565217	0.603633	0.638758	0.627324	0.670717	0.72973	0.574874	0.765	0.715505	0.731183	0.75154	0.923977	0.552885	0.628492	0.707031	0.545139	0.870968	0.646712	0.791294	0.928094	0.859423	0.988	0.682866	0.755525	0.952688	0.782946	0.950893	0.232057	0.243299	0.947507	0.395833	0.264033	0.881481	0.738298	0.953368
479	0.813433	0.686441	0.805447	0.855556	0.642105	0.532213	0.576419	0.859155	0.563433	0.62963	0.797927	0.854772	0.671245	0.691109	0.544664	0.605285	0.638758	0.627324	0.668287	0.722973	0.573869	0.763571	0.699858	0.729839	0.743326	0.926901	0.552885	0.594972	0.667969	0.572917	0.876061	0.742833	0.942289	0.93096	0.83369	1	0.684165	0.755525	0.952688	0.782946	0.950893	0.210526	0.25567	0.947507	0.395833	0.299376	0.890741	0.738298	0.953368
480	0.813433	0.683616	0.805447	0.855556	0.642105	0.532213	0.576419	0.859155	0.563433	0.62963	0.797927	0.854772	0.67033	0.691109	0.544664	0.605285	0.638758	0.627324	0.685905	0.727027	0.571357	0.764286	0.701991	0.731183	0.747433	0.929825	0.552885	0.611732	0.6875	0.572917	0.872666	0.74199	0.940547	0.930881	0.833766	1	0.683516	0.755525	0.956068	0.782946	0.950893	0.222488	0.25567	0.947507	0.395833	0.232848	0.881481	0.738298	0.958549
481	0.0335821	0.0338983	0.0311284	0.0222222	0.0421053	0.0168067	0.0611354	0.0798122	0.0447761	0.0864198	0.0984456	0.0788382	0.0961538	1	0.00158103	0.00990917	0.0263405	0.0145513	0.9113	1	0.0964824	1	1	1	0.0143737	0.0277778	0.0865385	0.0111732	0.0195312	0.00694444	0	0.0455312	0	0	0.000229078	0	0	0	0.0503869	0.0775194	0.016369	0.00956938	0.610309	0	0	0.037422	0.0925926	0	0.0103627
482	0.0335821	0.0338983	0.0311284	0.0259259	0.0385965	0.0168067	0.0611354	0.0798122	0.0447761	0.0864198	0.0932642	0.0788382	0.101648	1	0.00948617	0.00990917	0.0263405	0.0145513	0.9113	1	0.0964824	1	1	1	0.0143737	0.0277778	0.0865385	0.0111732	0.015625	0.00694444	0	0.0480607	0	0	7.63592e-05	0	0	0	0.0503869	0.0775194	0.016369	0.0143541	0.612371	0	0	0.039501	0.0925926	0	0.0103627
483	0.0335821	0.0338983	0.0311284	0.0259259	0.0385965	0.0168067	0.0611354	0.0751174	0.0410448	0.0823045	0.0932642	0.0788382	0.101648	1	0.00869565	0.00990917	0.0263405	0.0145513	0.9113	1	0.0964824	1	1	1	0.0143737	0.0292398	0.0865385	0.0111732	0.015625	0.00694444	0	0.0480607	0	0	7.63592e-05	0	0	0	0.0503869	0.0775194	0.016369	0.0119617	0.610309	0	0	0.039501	0.0925926	0	0.0103627
484	0.0335821	0.0338983	0.0311284	0.0259259	0.0385965	0.0168067	0.0611354	0.0751174	0.0410448	0.0823045	0.0880829	0.0788382	0.101648	1	0.00869565	0.00990917	0.0263405	0.0145513	0.9113	1	0.0964824	1	1	1	0.0143737	0.0292398	0.0865385	0.0111732	0.015625	0.00347222	0	0.0463744	0	0	7.63592e-05	0	0	0	0.0503869	0.0775194	0.016369	0.0119617	0.612371	0	0	0.039501	0.0925926	0	0.00777202
485	0.0335821	0.0310734	0.0272374	0.0259259	0.0385965	0.0168067	0.0567686	0.0751174	0.0410448	0.0823045	0.0880829	0.0746888	0.0860806	1	0.00158103	0.0165153	0.0244591	0.0145513	0.9113	1	0.0964824	1	1	1	0.0102669	0.0292398	0.0865385	0.0111732	0.015625	0.00347222	0	0.0463744	0	0	7.63592e-05	0	0	0	0.0503869	0.0775194	0.016369	0.0143541	0.612371	0	0	0.039501	0.0925926	0	0.00518135
486	0.0335821	0.0310734	0.0272374	0.0222222	0.0350877	0.0168067	0.0567686	0.0751174	0.0410448	0.0781893	0.0829016	0.0746888	0.0897436	1	0.00632411	0.0156895	0.0263405	0.0145513	0.9113	1	0.0964824	1	1	1	0.0102669	0.0277778	0.0961538	0.00558659	0.0117188	0.00347222	0	0.044688	0	0	7.63592e-05	0	0	0	0.0503869	0.0775194	0.016369	0.00956938	0.612371	0	0	0.04158	0.0925926	0	0.00518135
487	0.0335821	0.0310734	0.0233463	0.0222222	0.0315789	0.0140056	0.0567686	0.0704225	0.0410448	0.0781893	0.0829016	0.0705394	0.0842491	1	0.00869565	0.0090834	0.0263405	0.0145513	0.9113	1	0.0964824	1	1	1	0.0102669	0.0263158	0.0961538	0.00558659	0.0117188	0.00347222	0	0.0455312	0	0	7.63592e-05	0	0	0	0.0470075	0.0775194	0.016369	0.00956938	0.612371	0	0	0.039501	0.0925926	0	0.00518135
488	0.0335821	0.0310734	0.0233463	0.0185185	0.0315789	0.0140056	0.0567686	0.0704225	0.0410448	0.0781893	0.0829016	0.0705394	0.0787546	1	0.0102767	0.0090834	0.0225776	0.0145513	0.9113	1	0.0964824	1	1	1	0.0102669	0.0277778	0.0576923	0.0111732	0.015625	0.00347222	0	0.044688	0	0	7.63592e-05	0	0	0	0.0470075	0.0775194	0.016369	0.0119617	0.612371	0	0	0.04158	0.0925926	0	0.00518135
489	0.0298507	0.0282486	0.0233463	0.0037037	0.0315789	0.0140056	0.0524017	0.0704225	0.0373134	0.0781893	0.0829016	0.0705394	0.0769231	1	0.00395257	0.00990917	0.0206961	0.0129345	0.9113	1	0.0964824	1	1	1	0.0143737	0.0248538	0.0576923	0.0111732	0.015625	0.00347222	0	0.0607083	0	0	7.63592e-05	0	0	0	0.0470075	0.0775194	0.016369	0.0215311	0.610309	0	0	0.035343	0.0925926	0	0.00518135
490	0.0298507	0.0282486	0.0194553	0.0185185	0.0315789	0.0140056	0.0524017	0.0657277	0.0373134	0.0740741	0.0829016	0.0705394	0.0714286	1	0.00711462	0.00660611	0.0169332	0.0129345	0.9113	1	0.0964824	1	1	1	0.0184805	0.0248538	0.0576923	0.0111732	0.015625	0.00347222	0	0.0607083	0	0	7.63592e-05	0	0	0	0.0470075	0.0775194	0.016369	0.0143541	0.610309	0	0	0.033264	0.0925926	0	0.00518135
491	0.0261194	0.0282486	0.0233463	0.0222222	0.0385965	0.00280112	0.0524017	0.0657277	0.0373134	0.0617284	0.0777202	0.0705394	0.0888278	1	0.00237154	0.0090834	0.0169332	0.0129345	0.9113	1	0.0964824	1	1	1	0.0184805	0.0248538	0.0576923	0.0223464	0.0390625	0.00347222	0	0.0640809	0	0	0	0	0	0	0.0503869	0.0775194	0.016369	0	0.610309	0	0	0.033264	0.0925926	0	0.00518135
492	0.0298507	0.0254237	0.0233463	0.0148148	0.0385965	0.00560224	0.0524017	0.0610329	0.0373134	0.0740741	0.0829016	0.06639	0.0824176	1	0.00474308	0	0.0131703	0.00970089	0.9113	1	0.0964824	1	1	1	0.0184805	0.0263158	0.0576923	0.0335196	0.0390625	0.00347222	0	0.0640809	0	0	0	0	0	0	0.0503869	0.0775194	0.016369	0.00956938	0.614433	0	0	0.035343	0.0925926	0	0.00518135
493	0.0298507	0.0254237	0.0233463	0.0111111	0.0350877	0.00560224	0.0524017	0.0610329	0.0373134	0.0740741	0.0777202	0.06639	0.0869963	1	0.00474308	0	0.0131703	0.00970089	0.9113	1	0.0964824	1	1	1	0.0184805	0.0248538	0.00480769	0.0335196	0.0390625	0.00694444	0	0.0699831	0	0	0	0	0	0	0.0470075	0.0852713	0.014881	0.0143541	0.614433	0	0	0.033264	0.0925926	0	0.00518135
494	0.0298507	0.0254237	0.0194553	0.0148148	0.0385965	0.00560224	0.0524017	0.0657277	0.0410448	0.0740741	0.0829016	0.0705394	0.0915751	1	0.00474308	0	0.0112888	0.00970089	0.9113	1	0.0964824	1	1	1	0.0225873	0.0248538	0.00480769	0.0335196	0.0390625	0.0104167	0	0.0699831	0	0	0	0	0	0	0.0470075	0.0852713	0.014881	0.0191388	0.614433	0	0	0.033264	0.0925926	0	0.00518135
495	0.0298507	0.0254237	0.0194553	0.0148148	0.0385965	0.00560224	0.0524017	0.0657277	0.0410448	0.0740741	0.0829016	0.0705394	0.0915751	1	0.00474308	0	0.0112888	0.00970089	0.9113	1	0.0964824	1	1	1	0.0225873	0.0248538	0.00480769	0.0335196	0.0390625	0.0104167	0	0.0699831	0	0	0	0	0	0	0.0470075	0.0852713	0.014881	0.0191388	0.614433	0	0	0.033264	0.0925926	0	0.00518135
496	0.0298507	0.0254237	0.0194553	0.0148148	0.0421053	0.00840336	0.0524017	0.0657277	0.0410448	0.0740741	0.0829016	0.0705394	0.0934066	1	0.00474308	0	0.0131703	0.00970089	0.9113	1	0.8	1	1	1	0.0225873	0.0263158	0.00480769	0.0307263	0.0390625	0.0104167	0	0.0674536	0	0	7.63592e-05	0	0	0	0.0470075	0.0852713	0.014881	0.0143541	0.614433	0	0	0.033264	0.0925926	0	0.00518135
497	0.0298507	0.0282486	0.0194553	0.0148148	0.0385965	0.00560224	0.0524017	0.0657277	0.0410448	0.0740741	0.0829016	0.0705394	0.102564	1	0.00474308	0	0.0131703	0.00970089	0.9113	1	0.8	1	1	1	0.0225873	0.0248538	0.0192308	0.027933	0.0390625	0.0104167	0	0.0699831	0	0	0	0	0	0	0.0402487	0.0852713	0.014881	0.00956938	0.612371	0	0	0.031185	0.0740741	0	0.015544
498	0.0298507	0.0282486	0.0194553	0.0148148	0.0385965	0.00280112	0.0524017	0.0657277	0.0410448	0.0740741	0.0829016	0.0705394	0.101648	1	0.00316206	0.00247729	0.0169332	0.00970089	0.9113	1	0.0964824	1	1	1	0.0184805	0.0233918	0.0336538	0.0223464	0.03125	0.0138889	0	0.0640809	0	0	0	0	0	0	0.0470075	0.0852713	0.014881	0.0143541	0.612371	0	0	0.033264	0.0740741	0	0.015544
499	0.0298507	0.0282486	0.0194553	0.0111111	0.0315789	0.00840336	0.0567686	0.0657277	0.0410448	0.0740741	0.0829016	0.0705394	0.108059	1	0.00711462	0.00247729	0.0169332	0.0113177	0.9113	1	0.8	1	1	1	0.0143737	0.0233918	0.0384615	0.0223464	0.0273438	0.0138889	0	0.0640809	0	0	0	0	0	0	0.0470075	0.0852713	0.014881	0.0119617	0.610309	0	0	0.035343	0.0740741	0	0.015544
500	0.0298507	0.0282486	0.0194553	0.0148148	0.0280702	0.0112045	0.0567686	0.0657277	0.0410448	0.0740741	0.0829016	0.0705394	0.106227	1	0.00711462	0.00330306	0.0206961	0.0113177	0.9113	1	0.0964824	1	1	1	0.0143737	0.0219298	0.0576923	0.0167598	0.0195312	0.0138889	0	0.0640809	0	0	0	0	0	0	0.0470075	0.0852713	0.014881	0.0167464	0.612371	0	0	0.037422	0.0740741	0	0.015544
501	0.0298507	0.0282486	0.0194553	0.0148148	0.0280702	0.0112045	0.0567686	0.0657277	0.0410448	0.0740741	0.0829016	0.0705394	0.10989	1	0.00711462	0.00495458	0.0188147	0.0129345	0.9113	1	0.0964824	1	1	1	0.0143737	0.0248538	0.0625	0.0167598	0.0195312	0.0138889	0	0.0623946	0	0	0	0	0	0	0.0470075	0.0775194	0.014881	0.0143541	0.612371	0	0	0.035343	0.0740741	0	0.015544
502	0.0298507	0.0282486	0.0194553	0.0111111	0.0315789	0.0112045	0.0567686	0.0657277	0.0410448	0.0740741	0.0829016	0.0705394	0.126374	1	0.00158103	0.00578035	0.0225776	0.0129345	0.9113	1	0.0964824	1	1	1	0.0102669	0.0248538	0.0673077	0.0139665	0.015625	0.0138889	0	0.0623946	0	0	0.000534514	0	0	0	0.0470075	0.0775194	0.014881	0.0143541	0.612371	0	0	0.037422	0.0925926	0	0.015544
503	0.0298507	0.0282486	0.0155642	0.0111111	0.0315789	0.00840336	0.0567686	0.0657277	0.0410448	0.0699588	0.0777202	0.0705394	0.113553	1	0.000790514	0.00495458	0.0225776	0.0129345	0.9113	1	0.0964824	1	1	1	0.0102669	0.0233918	0.0673077	0.0111732	0.015625	0.0104167	0	0.0522766	0	0	0.000152718	0	0	0	0.0470075	0.0775194	0.014881	0.0191388	0.612371	0	0	0.037422	0.0925926	0	0.0103627
504	0.0261194	0.0282486	0.0155642	0.0037037	0.0315789	0.00280112	0.0567686	0.0657277	0.0373134	0.0699588	0.0777202	0.06639	0.0989011	1	0	0.00660611	0.0225776	0.0129345	0.9113	1	0.0964824	1	1	0.785618	0.0102669	0.0233918	0.0769231	0.0111732	0.015625	0.0104167	0	0.049747	0	0	7.63592e-05	0	0	0	0.0436281	0.0775194	0.014881	0.0119617	0.610309	0	0	0.031185	0.0925926	0	0.0103627
505	0.753731	0.680791	0.747082	0.822222	0.624561	0.495798	0.545852	0.830986	0.563433	0.584362	0.829016	0.834025	0.664835	0.692942	0.559684	0.598679	0.60301	0.620857	0.673755	0.727027	0.575879	0.742857	0.717639	0.728495	0.747433	0.916667	0.514423	0.550279	0.554688	0.579861	0.908319	0.608769	0.971393	0.965361	0.896762	0.969667	0.677671	0.755525	0.939171	0.651163	0.950893	0.574163	0.243299	0.866142	0.370833	0.50104	0.883333	0.691489	0.935233
506	0.753731	0.677966	0.747082	0.822222	0.621053	0.492997	0.541485	0.830986	0.559701	0.580247	0.829016	0.834025	0.664835	0.689276	0.562055	0.60033	0.604892	0.625707	0.670109	0.728378	0.578894	0.739286	0.71266	0.727823	0.747433	0.916667	0.509615	0.544693	0.535156	0.559028	0.913413	0.617201	0.971891	0.970377	0.861026	0.980889	0.677671	0.755525	0.939171	0.658915	0.950893	0.610048	0.241237	0.866142	0.370833	0.490644	0.892593	0.691489	0.937824
507	0.75	0.675141	0.743191	0.822222	0.617544	0.492997	0.537118	0.826291	0.559701	0.576132	0.823834	0.834025	0.664835	0.687443	0.561265	0.60033	0.60207	0.628941	0.668894	0.725676	0.580905	0.737143	0.711238	0.732527	0.73922	0.913743	0.509615	0.539106	0.542969	0.541667	0.901528	0.651771	0.973383	0.967989	0.840562	1	0.676805	0.755525	0.939171	0.658915	0.950893	0.54067	0.239175	0.866142	0.370833	0.422037	0.892593	0.691489	0.932642
508	0.75	0.672316	0.743191	0.822222	0.617544	0.490196	0.537118	0.826291	0.559701	0.576132	0.823834	0.834025	0.668498	0.690192	0.564427	0.605285	0.605833	0.630558	0.669502	0.724324	0.58392	0.739286	0.709815	0.741263	0.747433	0.913743	0.504808	0.527933	0.519531	0.565972	0.903226	0.650927	0.972388	0.96974	0.840562	1	0.676697	0.755525	0.935791	0.651163	0.950893	0.564593	0.249485	0.866142	0.370833	0.417879	0.892593	0.691489	0.930052
509	0.746269	0.672316	0.7393	0.822222	0.617544	0.490196	0.537118	0.821596	0.55597	0.576132	0.823834	0.829876	0.668498	0.698442	0.566008	0.608588	0.61524	0.633791	0.668287	0.723649	0.588442	0.745	0.708393	0.744624	0.735113	0.913743	0.504808	0.53352	0.546875	0.527778	0.904924	0.655143	0.973881	0.968546	0.839646	1	0.675722	0.755525	0.932412	0.651163	0.950893	0.602871	0.212371	0.866142	0.370833	0.467775	0.892593	0.691489	0.927461
510	0.746269	0.669492	0.7393	0.818519	0.617544	0.487395	0.537118	0.821596	0.552239	0.576132	0.823834	0.829876	0.668498	0.702108	0.568379	0.606936	0.622766	0.632175	0.674362	0.727027	0.582915	0.747857	0.711238	0.747312	0.735113	0.907895	0.5	0.539106	0.554688	0.572917	0.89983	0.664418	0.975124	0.971731	0.836591	1	0.679727	0.755525	0.932412	0.651163	0.950893	0.569378	0.247423	0.992126	0.40625	0.455301	0.892593	0.691489	0.930052
511	0.742537	0.669492	0.735409	0.818519	0.614035	0.487395	0.537118	0.816901	0.552239	0.572016	0.818653	0.825726	0.67033	0.696609	0.568379	0.605285	0.616181	0.630558	0.679222	0.72973	0.58593	0.750714	0.709815	0.751344	0.73922	0.907895	0.5	0.550279	0.550781	0.579861	0.901528	0.665261	0.978358	0.973403	0.8834	1	0.676047	0.755525	0.939171	0.643411	0.950893	0.617225	0.210309	0.997375	0.40625	0.405405	0.892593	0.682979	0.930052
512	0.742537	0.666667	0.735409	0.818519	0.614035	0.487395	0.537118	0.812207	0.548507	0.572016	0.818653	0.821577	0.671245	0.696609	0.574704	0.608588	0.622766	0.638642	0.678007	0.733784	0.587437	0.752857	0.716927	0.749328	0.747433	0.907895	0.5	0.550279	0.554688	0.572917	0.893039	0.657673	0.976617	0.972766	0.873396	1	0.674207	0.755525	0.949309	0.651163	0.950893	0.576555	0.249485	0.994751	0.40625	0.390852	0.892593	0.682979	0.935233
513	0.742537	0.666667	0.731518	0.818519	0.614035	0.487395	0.537118	0.816901	0.548507	0.576132	0.823834	0.825726	0.671245	0.704858	0.577075	0.611891	0.627469	0.637025	0.673147	0.732432	0.574874	0.746429	0.711238	0.748656	0.747433	0.910819	0.5	0.550279	0.554688	0.506944	0.89983	0.657673	0.973383	0.9656	0.619578	1	0.666198	0.755525	0.966206	0.689922	0.950893	0.583732	0.253608	0.994751	0.40625	0.363825	0.892593	0.676596	0.940415
514	0.742537	0.669492	0.7393	0.822222	0.617544	0.490196	0.541485	0.816901	0.552239	0.580247	0.829016	0.825726	0.678571	0.707608	0.581028	0.619323	0.634055	0.640259	0.676792	0.733784	0.597487	0.757857	0.715505	0.756048	0.755647	0.910819	0.509615	0.550279	0.574219	0.5	0.901528	0.63828	0.970149	0.964803	0.292608	1	0.668254	0.755525	0.962827	0.689922	0.950893	0.562201	0.257732	0.994751	0.40625	0.517672	0.892593	0.670213	0.943005
515	0.75	0.672316	0.747082	0.82963	0.624561	0.495798	0.550218	0.826291	0.559701	0.588477	0.839378	0.834025	0.671245	0.711274	0.577075	0.616846	0.631232	0.640259	0.670109	0.725676	0.573869	0.74	0.705548	0.748656	0.747433	0.913743	0.519231	0.550279	0.578125	0.586806	0.896435	0.653457	0.965174	0.958035	0.901802	1	0.671826	0.755525	0.966206	0.697674	0.950893	0.526316	0.247423	0.994751	0.40625	0.731809	0.892593	0.691489	0.937824
516	0.768657	0.677966	0.766537	0.844444	0.642105	0.507003	0.572052	0.849765	0.578358	0.609053	0.865285	0.850622	0.673077	0.703025	0.573123	0.589595	0.665099	0.635408	0.665857	0.723649	0.579899	0.734286	0.704125	0.739247	0.735113	0.902047	0.543269	0.527933	0.53125	0.552083	0.898132	0.663575	0.957711	0.94832	0.8989	1	0.678645	0.755525	0.969585	0.713178	0.950893	0.495215	0.249485	0.994751	0.40625	0.490644	0.883333	0.723404	0.927461
517	0.776119	0.683616	0.770428	0.848148	0.645614	0.509804	0.576419	0.849765	0.578358	0.609053	0.865285	0.850622	0.668498	0.703025	0.572332	0.606936	0.623706	0.633791	0.664642	0.721622	0.577889	0.736429	0.704125	0.738575	0.731006	0.902047	0.543269	0.527933	0.539062	0.565972	0.89983	0.663575	0.956716	0.948559	0.861026	1	0.681243	0.755525	0.969585	0.713178	0.950893	0.562201	0.249485	0.994751	0.40625	0.548857	0.883333	0.729787	0.92487
518	0.776119	0.689266	0.770428	0.851852	0.645614	0.512605	0.576419	0.85446	0.58209	0.609053	0.870466	0.854772	0.67033	0.700275	0.573913	0.608588	0.623706	0.632175	0.667679	0.724324	0.601005	0.746429	0.704125	0.749328	0.743326	0.902047	0.548077	0.550279	0.554688	0.520833	0.903226	0.631535	0.954478	0.947603	0.28062	1	0.679619	0.755525	0.969585	0.713178	0.950893	0.521531	0.257732	0.992126	0.40625	0.199584	0.883333	0.729787	0.92487
519	0.776119	0.69209	0.77821	0.855556	0.649123	0.518207	0.580786	0.859155	0.58209	0.613169	0.875648	0.858921	0.657509	0.694775	0.567589	0.606936	0.621825	0.628941	0.667072	0.72027	0.591457	0.745	0.669275	0.74328	0.743326	0.907895	0.548077	0.555866	0.589844	0.517361	0.903226	0.631535	0.95597	0.945453	0.687691	1	0.68016	0.755525	0.979724	0.72093	0.950893	0.523923	0.257732	0.994751	0.40625	0.399168	0.883333	0.729787	0.930052
520	0.779851	0.694915	0.77821	0.855556	0.649123	0.518207	0.580786	0.859155	0.585821	0.613169	0.875648	0.858921	0.658425	0.692942	0.565217	0.608588	0.620884	0.628941	0.665857	0.718919	0.58191	0.742143	0.674253	0.739919	0.743326	0.910819	0.548077	0.555866	0.589844	0.541667	0.910017	0.629005	0.954478	0.945453	0.760156	1	0.679186	0.755525	0.979724	0.736434	0.950893	0.547847	0.253608	0.994751	0.40625	0.444906	0.883333	0.729787	0.932642
521	0.779851	0.694915	0.77821	0.859259	0.652632	0.518207	0.580786	0.85446	0.58209	0.613169	0.875648	0.858921	0.665751	0.692942	0.566008	0.605285	0.620884	0.637025	0.667679	0.722973	0.601005	0.748571	0.674253	0.747312	0.743326	0.913743	0.548077	0.550279	0.582031	0.510417	0.901528	0.629005	0.958209	0.950868	0.45869	0.994778	0.679078	0.755525	0.979724	0.72093	0.950893	0.535885	0.253608	0.897638	0.385417	0.0997921	0.883333	0.729787	0.932642
522	0.779851	0.69209	0.774319	0.855556	0.649123	0.515406	0.576419	0.85446	0.58209	0.609053	0.865285	0.854772	0.665751	0.694775	0.559684	0.598679	0.610536	0.632175	0.668287	0.722973	0.58794	0.745	0.669275	0.742608	0.73922	0.913743	0.538462	0.539106	0.582031	0.541667	0.911715	0.623946	0.965174	0.957159	0.744502	0.999222	0.682433	0.755525	0.966206	0.697674	0.950893	0.574163	0.257732	0.897638	0.385417	0.214137	0.883333	0.729787	0.932642
523	0.776119	0.689266	0.766537	0.851852	0.642105	0.509804	0.567686	0.840376	0.574627	0.600823	0.860104	0.850622	0.657509	0.68561	0.560474	0.595376	0.601129	0.632175	0.667072	0.726351	0.579899	0.742143	0.679232	0.738575	0.735113	0.913743	0.528846	0.527933	0.589844	0.527778	0.921902	0.67285	0.965174	0.97197	0.827505	1	0.679619	0.755525	0.956068	0.682171	0.950893	0.614833	0.25567	0.897638	0.385417	0.268191	0.892593	0.729787	0.930052
524	0.768657	0.686441	0.758755	0.844444	0.638596	0.507003	0.563319	0.840376	0.570896	0.592593	0.849741	0.846473	0.663004	0.690192	0.557312	0.592073	0.595484	0.632175	0.664642	0.725676	0.576884	0.756429	0.674253	0.734543	0.73922	0.913743	0.528846	0.522346	0.558594	0.545139	0.91511	0.666948	0.964925	0.95915	0.85843	1	0.682217	0.755525	0.949309	0.682171	0.950893	0.598086	0.214433	0.900262	0.385417	0.259875	0.892593	0.729787	0.930052
525	0.761194	0.683616	0.758755	0.840741	0.631579	0.529412	0.558952	0.835681	0.570896	0.592593	0.84456	0.842324	0.664835	0.690192	0.557312	0.595376	0.595484	0.632175	0.664034	0.724324	0.574372	0.753571	0.669275	0.739919	0.731006	0.913743	0.524038	0.511173	0.566406	0.513889	0.918506	0.679595	0.96592	0.958831	0.865531	1	0.683948	0.755525	0.949309	0.674419	0.950893	0.607656	0.216495	0.897638	0.385417	0.259875	0.892593	0.729787	0.92487
526	0.761194	0.680791	0.758755	0.840741	0.62807	0.501401	0.558952	0.835681	0.570896	0.588477	0.84456	0.838174	0.675824	0.697525	0.560474	0.603633	0.575729	0.627324	0.667679	0.724324	0.589447	0.759286	0.668563	0.740591	0.737166	0.912281	0.519231	0.539106	0.570312	0.5625	0.903226	0.682125	0.966418	0.962335	0.816356	1	0.685031	0.755525	0.949309	0.666667	0.950893	0.519139	0.268041	0.897638	0.385417	0.301455	0.892593	0.729787	0.92487
527	0.757463	0.677966	0.750973	0.837037	0.624561	0.498599	0.554585	0.830986	0.567164	0.584362	0.839378	0.838174	0.673077	0.703025	0.559684	0.601982	0.610536	0.633791	0.668894	0.724324	0.58794	0.753571	0.674253	0.744624	0.731006	0.910819	0.519231	0.544693	0.5625	0.527778	0.903226	0.666105	0.969154	0.960185	0.85423	1	0.684381	0.755525	0.949309	0.658915	0.950893	0.61244	0.253608	0.900262	0.385417	0.259875	0.892593	0.721277	0.92487
528	0.753731	0.677966	0.750973	0.833333	0.624561	0.495798	0.554585	0.826291	0.567164	0.584362	0.834197	0.838174	0.677656	0.707608	0.562055	0.603633	0.609595	0.633791	0.667072	0.721622	0.577889	0.752857	0.670697	0.745296	0.726899	0.910819	0.514423	0.527933	0.566406	0.538194	0.904924	0.677909	0.968408	0.962096	0.8666	1	0.684273	0.755525	0.949309	0.658915	0.950893	0.614833	0.25567	0.900262	0.385417	0.382536	0.892593	0.721277	0.92228
529	0.0223881	0.0282486	0.0116732	0.0037037	0.0280702	0	0.0524017	0.0610329	0.0373134	0.0658436	0.0725389	0.06639	0.113553	1	0	0.00660611	0.0225776	0.00646726	0.9113	1	0.0964824	1	1	1	0.00616016	0.0219298	0.0625	0.00837989	0.0117188	0.0104167	0	0.0480607	0	0	0.000152718	0	0	0	0.0402487	0.0775194	0.014881	0.0143541	0.612371	0	0	0.037422	0.0925926	0	0.00518135
530	0.0223881	0.0254237	0.0077821	0	0.0280702	0	0.0524017	0.0610329	0.0335821	0.0658436	0.0725389	0.0622407	0.10989	1	0	0.00660611	0.0225776	0.00970089	0.9113	1	0.0964824	1	1	1	0.00616016	0.0219298	0.0673077	0.00837989	0.0117188	0.0104167	0	0.0480607	0	0	0.000152718	0	0	0	0.0402487	0.0775194	0.014881	0.0143541	0.612371	0	0	0.037422	0.111111	0	0.00518135
531	0.0223881	0.0254237	0.0077821	0	0.0280702	0	0.0524017	0.056338	0.0335821	0.0617284	0.0673575	0.0622407	0.111722	1	0	0.00660611	0.0244591	0.0113177	0.9113	1	0.0964824	1	1	1	0.00616016	0.0219298	0.0673077	0.00558659	0.0117188	0.00694444	0	0.0472175	0	0	0	0	0	0	0.0402487	0.0775194	0.014881	0.00956938	0.591753	0	0	0.037422	0.0925926	0	0.00518135
532	0.0223881	0.0225989	0.00389105	0.0037037	0.0280702	0	0.0480349	0.056338	0.0298507	0.0617284	0.0621762	0.0580913	0.119048	1	0	0.00660611	0.0244591	0.0129345	0.9113	1	0.0964824	1	1	1	0.00616016	0.0219298	0.0769231	0.00558659	0.0078125	0.00694444	0	0.0463744	0	0	0	0	0	0	0.0436281	0.0775194	0.014881	0.0119617	0.604124	0	0	0.035343	0.0925926	0	0.00518135
533	0.0223881	0.0225989	0.00389105	0	0.0245614	0.00280112	0.0480349	0.0516432	0.0298507	0.0576132	0.0621762	0.0539419	0.122711	1	0	0.0090834	0.0244591	0.0113177	0.9113	1	0.0964824	1	1	1	0.00616016	0.0219298	0.0769231	0.00558659	0.0078125	0.00694444	0	0.0463744	0	0	0	0	0	0	0.0402487	0.0775194	0.014881	0.00956938	0.610309	0	0	0.037422	0.0925926	0	0.00518135
534	0.0223881	0.019774	0.00389105	0.0037037	0.0245614	0.00560224	0.0480349	0.0516432	0.0298507	0.0576132	0.0621762	0.0539419	0.00732601	1	0	0.0090834	0.0263405	0.0129345	0.9113	1	0.0964824	1	1	1	0.00616016	0.0219298	0.0865385	0.00558659	0.0078125	0.00694444	0	0.0463744	0	0	0	0	0	0	0.0436281	0.0775194	0.0133929	0.00956938	0.610309	0	0	0.037422	0.0925926	0	0.00518135
535	0.0223881	0.019774	0.00389105	0.0037037	0.0245614	0.00560224	0.0480349	0.0516432	0.0298507	0.0576132	0.0621762	0.0539419	0.00732601	1	0	0.0090834	0.0263405	0.0129345	0.9113	1	0.0964824	1	1	1	0.00616016	0.0219298	0.0865385	0.00558659	0.0078125	0.00694444	0	0.0463744	0	0	0	0	0	0	0.0436281	0.0775194	0.0133929	0.00956938	0.610309	0	0	0.0582121	0.0925926	0	0.00518135
536	0.0223881	0.019774	0.00389105	0.0037037	0.0245614	0.00560224	0.0480349	0.0516432	0.0298507	0.0576132	0.0621762	0.0539419	0.00732601	1	0	0.00660611	0.0225776	0.0129345	0.9113	1	0.0964824	1	1	1	0.00616016	0.0204678	0.0865385	0.00558659	0.0078125	0.00347222	0	0.0463744	0	0	0	0	0	0	0.0402487	0.0697674	0.0133929	0	0.608247	0	0	0.035343	0.0925926	0	0.00518135
537	0.0149254	0.019774	0	0.0111111	0.0245614	0.00280112	0.0436681	0.0469484	0.0261194	0.0493827	0.0621762	0.0373444	0.131868	1	0.00316206	0.00495458	0.0188147	0.0113177	0.9113	1	0.0964824	1	1	1	0.00616016	0.0219298	0.0865385	0.00558659	0.0078125	0.00694444	0	0.0463744	0	0	0	0	0	0	0.0402487	0.0697674	0.0133929	0	0.608247	0	0	0.037422	0.0925926	0	0.00518135
538	0.0149254	0.019774	0	0.0111111	0.0245614	0.00560224	0.0436681	0.0469484	0.0261194	0.0493827	0.0569948	0.0497925	0.135531	1	0.00711462	0.00495458	0.0188147	0.0113177	0.9113	1	0.0964824	1	1	1	0.00616016	0.0219298	0.0865385	0.00558659	0.0078125	0.00694444	0	0.0463744	0	0	0	0	0	0	0.0402487	0.0697674	0.0133929	0	0.608247	0	0	0.037422	0.0925926	0	0.00518135
539	0.0149254	0.019774	0	0.0111111	0.0245614	0.00280112	0.0436681	0.0469484	0.0261194	0.0493827	0.0569948	0.0497925	0.136447	1	0.00711462	0.00660611	0.0169332	0.0113177	0.9113	1	0.0964824	1	1	1	0.00616016	0.0219298	0.0865385	0.00558659	0.0078125	0.00694444	0	0.0463744	0	0	0	0	0	0	0.0402487	0.0697674	0.0133929	0.00956938	0.610309	0	0	0.035343	0.0925926	0	0.00518135
540	0.0149254	0.0169492	0	0.0111111	0.0280702	0.00280112	0.0436681	0.0422535	0.0298507	0.0493827	0.0569948	0.0497925	0.122711	1	0.00237154	0.00330306	0.0150517	0.00808407	0.9113	1	0.0964824	1	1	1	0.00616016	0.0219298	0.0865385	0.00558659	0.0078125	0.00694444	0	0.044688	0	0	0	0	0	0	0.0402487	0.0697674	0.016369	0.00956938	0.610309	0	0	0.037422	0.0925926	0	0.00518135
541	0.0149254	0.0169492	0	0.0148148	0.0245614	0.00840336	0.0436681	0.0422535	0.0298507	0.0493827	0.0569948	0.0497925	0.145604	1	0.00316206	0.00330306	0.0131703	0.00808407	0.9113	1	0.0964824	1	1	1	0.00616016	0.0219298	0.00961538	0.00558659	0.0078125	0.0104167	0	0.044688	0	0	0	0	0	0	0.0402487	0.0697674	0.0119048	0.0143541	0.614433	0	0	0.035343	0.0925926	0	0.00518135
542	0.0149254	0.0169492	0.00389105	0.0148148	0.0245614	0.0112045	0.0436681	0.0469484	0.0298507	0.0493827	0.0569948	0.0497925	0.154762	1	0.00474308	0.00495458	0.0131703	0.00970089	0.9113	1	0.0964824	1	1	1	0.00616016	0.0248538	0.0144231	0.00558659	0.0078125	0.0104167	0	0.0421585	0	0	0	0	0	0	0.0402487	0.0697674	0.0119048	0.0143541	0.614433	0	0	0.035343	0.0925926	0	0.00518135
543	0.0149254	0.0169492	0.00389105	0.0148148	0.0245614	0.0112045	0.0436681	0.0469484	0.0298507	0.0493827	0.0569948	0.0497925	0.147436	1	0.0055336	0.00330306	0.0131703	0.00970089	0.9113	1	0.0964824	1	1	1	0.00616016	0.0248538	0.00961538	0.00558659	0.0078125	0.0138889	0	0.0421585	0	0	0	0	0	0	0.0402487	0.0697674	0.0119048	0.0167464	0.612371	0	0	0.035343	0.0925926	0	0.00518135
544	0.0149254	0.019774	0.00389105	0.0148148	0.0245614	0.0112045	0.0436681	0.0469484	0.0298507	0.0493827	0.0621762	0.0497925	0.147436	1	0.0055336	0.00330306	0.0112888	0.00970089	0.9113	1	0.0964824	1	1	1	0.00616016	0.0248538	0.00961538	0.00558659	0.0078125	0.0138889	0	0.0421585	0	0	0	0	0	0	0.0402487	0.0697674	0.0119048	0.0167464	0.614433	0	0	0.035343	0.0925926	0	0.00518135
545	0.0149254	0.019774	0.0077821	0.0185185	0.0280702	0.0112045	0.0436681	0.0469484	0.0335821	0.0534979	0.0621762	0.0497925	0.142857	1	0.00632411	0.00330306	0.0112888	0.00970089	0.9113	1	0.0964824	1	1	1	0.0184805	0.0248538	0.0192308	0.027933	0.03125	0.0138889	0	0.0657673	0	0	0	0	0	0	0.0402487	0.0697674	0.0119048	0.0143541	0.614433	0	0	0.035343	0.0740741	0	0.0103627
546	0.0149254	0.019774	0.0077821	0.0185185	0.0245614	0.0140056	0.0436681	0.0516432	0.0335821	0.0534979	0.0621762	0.0497925	0.147436	1	0.00632411	0.00495458	0.0112888	0.00970089	0.9113	1	0.0964824	1	1	1	0.0184805	0.0248538	0.0336538	0.0223464	0.0273438	0.0138889	0	0.0632378	0	0	0	0	0	0	0.0402487	0.0697674	0.0119048	0.0119617	0.614433	0	0	0.035343	0.0740741	0	0.0103627
547	0.0186567	0.019774	0.0077821	0.0185185	0.0245614	0.0140056	0.0436681	0.0516432	0.0335821	0.0534979	0.0621762	0.0539419	0.147436	1	0.00632411	0.00495458	0.0150517	0.00970089	0.9113	1	0.0964824	1	1	1	0.0143737	0.0219298	0.0336538	0.0223464	0.03125	0.0173611	0	0.0607083	0	0	0	0	0	0	0.0368693	0.0620155	0.0119048	0.0143541	0.614433	0	0	0.035343	0.0740741	0	0.015544
548	0.0186567	0.0225989	0.0116732	0.0185185	0.0280702	0.0140056	0.0436681	0.0516432	0.0335821	0.0534979	0.0673575	0.0539419	0.142857	1	0.00632411	0.00660611	0.0188147	0.00970089	0.9113	1	0.0964824	1	1	1	0.0143737	0.0219298	0.0432692	0.0167598	0.0273438	0.0138889	0	0.0573356	0	0	0	0	0	0	0.0368693	0.0620155	0.0119048	0.0143541	0.612371	0	0	0.035343	0.0740741	0	0.015544
549	0.0186567	0.0225989	0.0116732	0.0222222	0.0280702	0.0140056	0.0436681	0.0516432	0.0335821	0.0576132	0.0673575	0.0539419	0.148352	1	0.00632411	0.0090834	0.0188147	0.00970089	0.9113	1	0.0964824	1	1	1	0.0143737	0.0219298	0.0480769	0.0167598	0.0273438	0.0138889	0.0203735	0.0548061	0	0	0	0	0	0	0.0368693	0.0620155	0.0104167	0.00956938	0.610309	0	0	0.039501	0.0740741	0	0.015544
550	0.0186567	0.0254237	0.0116732	0.0222222	0.0245614	0.0140056	0.0436681	0.0516432	0.0335821	0.0576132	0.0673575	0.0539419	0.163004	1	0.00632411	0.0090834	0.0206961	0.00970089	0.9113	1	0.0964824	1	1	1	0.0143737	0.0219298	0.0480769	0.0167598	0.0273438	0.0138889	0.0169779	0.0539629	0	0	0	0	0	0	0.0368693	0.0697674	0.0119048	0.00956938	0.612371	0	0	0.037422	0.0740741	0	0.015544
551	0.0186567	0.0282486	0.0155642	0.0222222	0.0280702	0.0140056	0.0436681	0.0516432	0.0335821	0.0534979	0.0673575	0.0539419	0.158425	1	0.00711462	0.0090834	0.0188147	0.00970089	0.9113	1	0.0964824	1	1	1	0.0143737	0.0219298	0.0480769	0.0167598	0.0234375	0.0138889	0.0271647	0.0531197	0	0	0	0	0	0	0.0334899	0.0620155	0.0104167	0.0119617	0.610309	0	0	0.037422	0.0740741	0	0.015544
552	0.0223881	0.0282486	0.0155642	0.0222222	0.0315789	0.0140056	0.0436681	0.0469484	0.0335821	0.0534979	0.0673575	0.0539419	0.158425	1	0.00632411	0.00990917	0.0206961	0.00970089	0.9113	1	0.0964824	1	1	1	0.0102669	0.0204678	0.0576923	0.0167598	0.0195312	0.0138889	0.0373514	0.0505902	0	0	0	0	0	0	0.0334899	0.0620155	0.0104167	0.0143541	0.610309	0	0	0.04158	0.0925926	0	0.0103627
553	0.753731	0.677966	0.747082	0.825926	0.621053	0.495798	0.545852	0.826291	0.563433	0.580247	0.829016	0.834025	0.678571	0.707608	0.566798	0.606936	0.61524	0.640259	0.674362	0.72027	0.59196	0.767857	0.685633	0.757392	0.731006	0.910819	0.509615	0.511173	0.542969	0.506944	0.913413	0.644182	0.968408	0.963768	0.643555	1	0.68081	0.755525	0.939171	0.643411	0.950893	0.566986	0.25567	0.900262	0.385417	0.024948	0.877778	0.702128	0.919689
554	0.75	0.677966	0.747082	0.825926	0.617544	0.495798	0.545852	0.821596	0.563433	0.580247	0.823834	0.829876	0.678571	0.707608	0.565217	0.606936	0.605833	0.638642	0.673147	0.731081	0.583417	0.756429	0.697013	0.739247	0.73922	0.921053	0.504808	0.567039	0.644531	0.559028	0.901528	0.679595	0.969652	0.967192	0.844304	1	0.681892	0.755525	0.932412	0.635659	0.950893	0.593301	0.259794	0.913386	0.385417	0.018711	0.883333	0.702128	0.92487
555	0.75	0.677966	0.747082	0.825926	0.614035	0.492997	0.545852	0.821596	0.563433	0.580247	0.823834	0.829876	0.673077	0.703025	0.562055	0.60033	0.601129	0.633791	0.674362	0.739189	0.592965	0.762143	0.6899	0.737903	0.735113	0.923977	0.509615	0.544693	0.59375	0.517361	0.911715	0.671164	0.969652	0.96759	0.852627	1	0.680485	0.755525	0.94593	0.651163	0.950893	0.58134	0.261856	0.913386	0.385417	0.024948	0.892593	0.702128	0.927461
556	0.746269	0.675141	0.743191	0.822222	0.610526	0.492997	0.545852	0.821596	0.563433	0.576132	0.818653	0.829876	0.673077	0.697525	0.558103	0.60033	0.596425	0.632175	0.674362	0.741892	0.584422	0.755714	0.672831	0.732527	0.73922	0.923977	0.509615	0.555866	0.59375	0.538194	0.859083	0.666105	0.970398	0.96552	0.876374	1	0.682541	0.755525	0.94593	0.658915	0.950893	0.598086	0.218557	0.913386	0.385417	0.022869	0.892593	0.702128	0.930052
557	0.746269	0.675141	0.7393	0.818519	0.610526	0.492997	0.545852	0.816901	0.563433	0.576132	0.818653	0.825726	0.678571	0.709441	0.562055	0.601982	0.601129	0.638642	0.675577	0.743243	0.58794	0.757857	0.687055	0.736559	0.735113	0.913743	0.504808	0.561453	0.609375	0.53125	0.893039	0.67285	0.971891	0.96767	0.852092	1	0.679511	0.755525	0.949309	0.658915	0.950893	0.576555	0.216495	0.913386	0.385417	0.016632	0.883333	0.680851	0.92228
558	0.742537	0.672316	0.7393	0.814815	0.607018	0.490196	0.545852	0.816901	0.559701	0.572016	0.813472	0.825726	0.685897	0.71494	0.570751	0.610239	0.608655	0.643492	0.679222	0.75	0.59196	0.759286	0.688478	0.737231	0.743326	0.910819	0.504808	0.572626	0.617188	0.604167	0.89983	0.637437	0.972886	0.965122	0.84774	1	0.676047	0.755525	0.949309	0.658915	0.950893	0.564593	0.259794	0.913386	0.385417	0.00623701	0.883333	0.680851	0.927461
559	0.742537	0.675141	0.7393	0.811111	0.603509	0.487395	0.537118	0.816901	0.559701	0.572016	0.80829	0.825726	0.685897	0.718607	0.56917	0.611891	0.614299	0.648343	0.676792	0.741216	0.58794	0.737857	0.688478	0.75	0.75154	0.910819	0.504808	0.578212	0.617188	0.572917	0.887946	0.655987	0.973632	0.968148	0.844151	1	0.675073	0.755525	0.956068	0.658915	0.950893	0.545455	0.268041	0.913386	0.385417	0.320166	0.883333	0.680851	0.932642
560	0.742537	0.675141	0.7393	0.811111	0.603509	0.487395	0.537118	0.816901	0.559701	0.572016	0.80829	0.825726	0.687729	0.718607	0.572332	0.613543	0.609595	0.646726	0.676185	0.738514	0.588442	0.764286	0.685633	0.75	0.75154	0.910819	0.504808	0.558659	0.578125	0.586806	0.893039	0.651771	0.973632	0.969342	0.876451	1	0.67464	0.755525	0.956068	0.658915	0.950893	0.552632	0.25567	0.913386	0.385417	0.428274	0.883333	0.680851	0.935233
561	0.742537	0.683616	0.743191	0.811111	0.603509	0.487395	0.541485	0.821596	0.563433	0.572016	0.80829	0.825726	0.685897	0.711274	0.56917	0.608588	0.605833	0.646726	0.6774	0.739865	0.596482	0.745	0.692034	0.752688	0.75154	0.910819	0.509615	0.589385	0.625	0.53125	0.896435	0.60371	0.973632	0.966794	0.811393	1	0.677021	0.755525	0.956068	0.666667	0.950893	0.564593	0.268041	0.913386	0.385417	0.397089	0.892593	0.680851	0.937824
562	0.75	0.677966	0.743191	0.814815	0.607018	0.490196	0.545852	0.830986	0.570896	0.580247	0.813472	0.825726	0.677656	0.707608	0.56917	0.606936	0.603951	0.643492	0.676792	0.737838	0.58191	0.714286	0.685633	0.75	0.75154	0.907895	0.519231	0.583799	0.628906	0.618056	0.891341	0.673693	0.968408	0.963768	0.848962	1	0.674857	0.755525	0.966206	0.697674	0.950893	0.550239	0.259794	0.913386	0.385417	0.401247	0.883333	0.680851	0.940415
563	0.75	0.680791	0.747082	0.814815	0.607018	0.492997	0.550218	0.830986	0.570896	0.580247	0.818653	0.829876	0.680403	0.704858	0.56917	0.606936	0.604892	0.646726	0.6774	0.737838	0.588945	0.753571	0.696302	0.75336	0.755647	0.907895	0.524038	0.567039	0.597656	0.559028	0.896435	0.680438	0.965423	0.959946	0.784285	1	0.673558	0.755525	0.962827	0.697674	0.950893	0.564593	0.251546	0.913386	0.385417	0.451143	0.883333	0.680851	0.940415
564	0.761194	0.680791	0.750973	0.822222	0.610526	0.495798	0.558952	0.835681	0.578358	0.588477	0.823834	0.834025	0.680403	0.709441	0.563636	0.605285	0.598307	0.642684	0.675577	0.735135	0.568342	0.754286	0.684211	0.749328	0.755647	0.910819	0.528846	0.550279	0.585938	0.583333	0.886248	0.689713	0.962687	0.953177	0.862859	1	0.676805	0.755525	0.959447	0.689922	0.950893	0.564593	0.261856	0.913386	0.385417	0.555094	0.883333	0.702128	0.940415
565	0.768657	0.689266	0.762646	0.82963	0.621053	0.504202	0.567686	0.84507	0.585821	0.596708	0.834197	0.838174	0.673077	0.704858	0.566008	0.605285	0.605833	0.641876	0.674362	0.732432	0.574874	0.767857	0.685633	0.749328	0.75154	0.910819	0.543269	0.567039	0.601562	0.5625	0.887946	0.631535	0.958955	0.949992	0.857972	1	0.674965	0.755525	0.966206	0.713178	0.950893	0.629187	0.249485	0.913386	0.385417	0.7921	0.883333	0.702128	0.940415
566	0.779851	0.694915	0.770428	0.837037	0.631579	0.512605	0.580786	0.85446	0.589552	0.604938	0.839378	0.846473	0.665751	0.704858	0.56917	0.608588	0.605833	0.640259	0.673755	0.728378	0.578894	0.740714	0.692745	0.751344	0.75154	0.910819	0.552885	0.572626	0.589844	0.572917	0.901528	0.582631	0.95796	0.951346	0.872557	1	0.678212	0.755525	0.972965	0.72093	0.950893	0.667464	0.249485	0.913386	0.385417	0.434511	0.883333	0.723404	0.940415
567	0.779851	0.694915	0.774319	0.837037	0.631579	0.512605	0.580786	0.85446	0.593284	0.604938	0.84456	0.846473	0.664835	0.703941	0.56996	0.610239	0.603951	0.638642	0.674362	0.731757	0.581407	0.728571	0.6899	0.75336	0.755647	0.910819	0.552885	0.561453	0.589844	0.5625	0.911715	0.586847	0.957711	0.949435	0.860415	1	0.677238	0.755525	0.976344	0.72093	0.950893	0.667464	0.249485	0.91601	0.385417	0.320166	0.892593	0.723404	0.945596
568	0.783582	0.69774	0.774319	0.840741	0.635088	0.515406	0.580786	0.859155	0.593284	0.609053	0.84456	0.850622	0.673077	0.703025	0.568379	0.608588	0.607714	0.640259	0.675577	0.731757	0.584925	0.765	0.694879	0.752016	0.759754	0.910819	0.557692	0.561453	0.578125	0.579861	0.911715	0.586847	0.881343	0.944338	0.864081	1	0.676588	0.755525	0.976344	0.736434	0.950893	0.65311	0.259794	0.913386	0.385417	0.313929	0.883333	0.723404	0.948187
569	0.783582	0.69774	0.774319	0.840741	0.638596	0.518207	0.585153	0.859155	0.593284	0.609053	0.849741	0.850622	0.67033	0.697525	0.566008	0.605285	0.605833	0.637025	0.678615	0.736486	0.586432	0.765	0.662162	0.754704	0.759754	0.910819	0.557692	0.561453	0.566406	0.572917	0.950764	0.591906	0.958458	0.95039	0.857361	0.986889	0.677346	0.755525	0.976344	0.72093	0.950893	0.674641	0.259794	0.897638	0.385417	0.474012	0.892593	0.723404	0.950777
570	0.783582	0.700565	0.774319	0.840741	0.638596	0.521008	0.580786	0.859155	0.589552	0.604938	0.84456	0.850622	0.67033	0.697525	0.570751	0.610239	0.603951	0.635408	0.678615	0.736486	0.59598	0.756429	0.678521	0.750672	0.759754	0.910819	0.552885	0.555866	0.585938	0.583333	0.940577	0.55059	0.958955	0.954611	0.856674	0.945778	0.67464	0.755525	0.976344	0.72093	0.950893	0.660287	0.251546	0.850394	0.364583	0.35343	0.892593	0.723404	0.953368
571	0.779851	0.694915	0.774319	0.840741	0.635088	0.518207	0.576419	0.85446	0.589552	0.604938	0.839378	0.846473	0.675824	0.700275	0.565217	0.610239	0.606773	0.635408	0.674362	0.728378	0.580905	0.756429	0.670697	0.747312	0.747433	0.916667	0.548077	0.544693	0.5625	0.541667	0.943973	0.577572	0.960199	0.958353	0.853238	0.966667	0.679186	0.755525	0.979724	0.736434	0.950893	0.69378	0.259794	0.850394	0.364583	0.35343	0.892593	0.723404	0.950777
572	0.779851	0.694915	0.770428	0.837037	0.631579	0.515406	0.576419	0.85446	0.585821	0.600823	0.839378	0.846473	0.677656	0.702108	0.564427	0.606936	0.60207	0.637025	0.670717	0.728378	0.580905	0.755	0.667852	0.74328	0.73922	0.915205	0.543269	0.53352	0.550781	0.576389	0.945671	0.579258	0.961692	0.955487	0.865608	0.966889	0.679186	0.755525	0.972965	0.736434	0.950893	0.744019	0.214433	0.850394	0.364583	0.365904	0.892593	0.723404	0.940415
573	0.776119	0.69209	0.766537	0.837037	0.631579	0.515406	0.572052	0.85446	0.58209	0.596708	0.834197	0.842324	0.671245	0.703941	0.564427	0.598679	0.594544	0.637025	0.668894	0.731081	0.569347	0.755	0.669986	0.738575	0.722793	0.913743	0.538462	0.527933	0.554688	0.545139	0.950764	0.608769	0.964925	0.958114	0.862783	0.999	0.681243	0.755525	0.966206	0.728682	0.950893	0.720096	0.25567	0.850394	0.364583	0.390852	0.892593	0.723404	0.930052
574	0.772388	0.689266	0.762646	0.833333	0.62807	0.512605	0.572052	0.849765	0.58209	0.596708	0.829016	0.842324	0.672161	0.702108	0.562055	0.597027	0.590781	0.635408	0.668287	0.727703	0.574372	0.752857	0.674253	0.735887	0.720739	0.909357	0.533654	0.519553	0.546875	0.59375	0.947368	0.630691	0.964925	0.960105	0.848351	1	0.682325	0.755525	0.952688	0.713178	0.950893	0.672249	0.270103	0.850394	0.364583	0.355509	0.883333	0.723404	0.92228
575	0.772388	0.689266	0.762646	0.833333	0.624561	0.509804	0.567686	0.849765	0.578358	0.592593	0.823834	0.842324	0.671245	0.698442	0.562055	0.60033	0.588899	0.633791	0.674362	0.724324	0.578894	0.752143	0.677809	0.737903	0.706366	0.904971	0.533654	0.527933	0.570312	0.5625	0.947368	0.708263	0.964428	0.961618	0.863393	1	0.682541	0.755525	0.949309	0.713178	0.950893	0.686603	0.210309	0.850394	0.364583	0.293139	0.883333	0.723404	0.909326
576	0.768657	0.686441	0.762646	0.82963	0.624561	0.509804	0.567686	0.84507	0.574627	0.592593	0.818653	0.838174	0.67033	0.698442	0.559684	0.60033	0.596425	0.632175	0.675577	0.721622	0.572864	0.760714	0.669986	0.733199	0.714579	0.899123	0.528846	0.539106	0.585938	0.579861	0.952462	0.715008	0.965174	0.959548	0.86996	0.999778	0.684165	0.755525	0.949309	0.713178	0.950893	0.660287	0.210309	0.879265	0.375	0.386694	0.883333	0.723404	0.906736
577	0.0223881	0.0310734	0.0194553	0.0222222	0.0245614	0.0140056	0.0436681	0.0469484	0.0335821	0.0534979	0.0673575	0.0539419	0.175824	1	0.00711462	0.00990917	0.0206961	0.00970089	0.9113	1	0.0964824	1	1	1	0.0102669	0.0219298	0.0576923	0.0111732	0.0195312	0.0138889	0.0339559	0.0505902	0	0	0.000381796	0	0	0	0.0334899	0.0620155	0.0104167	0.00956938	0.612371	0	0	0.037422	0.1	0	0.0103627
578	0.0223881	0.0310734	0.0194553	0.0222222	0.0245614	0.0140056	0.0436681	0.0469484	0.0335821	0.0576132	0.0673575	0.0497925	0.168498	1	0.00711462	0.00990917	0.0206961	0.00970089	0.9113	1	0.0964824	1	1	1	0.0102669	0.0233918	0.0625	0.0111732	0.0195312	0.0138889	0.0220713	0.0514334	0	0	0.000152718	0	0	0	0.0334899	0.0620155	0.0104167	0.0167464	0.612371	0	0	0.039501	0.1	0	0.0103627
579	0.0223881	0.0310734	0.0194553	0.0222222	0.0245614	0.0140056	0.0436681	0.0469484	0.0335821	0.0576132	0.0673575	0.0497925	0.168498	1	0.00711462	0.00990917	0.0206961	0.00970089	0.9113	1	0.0964824	1	1	1	0.0102669	0.0233918	0.0625	0.0111732	0.0195312	0.0138889	0.0220713	0.0514334	0	0	0.000152718	0	0	0	0.0334899	0.0620155	0.0104167	0.0167464	0.612371	0	0	0.039501	0.1	0	0.0103627
580	0.0186567	0.0338983	0.0233463	0.0185185	0.0245614	0.0112045	0.0393013	0.0422535	0.0335821	0.0534979	0.0621762	0.0497925	0.184982	1	0.00711462	0.0115607	0.0225776	0.00970089	0.9113	1	0.0964824	1	1	1	0.0102669	0.0233918	0.0625	0.0111732	0.015625	0.0104167	0.040747	0.0463744	0	0	0.000152718	0	0	0	0.0334899	0.0542636	0.0104167	0.00956938	0.610309	0	0	0.04158	0.1	0	0.0103627
581	0.0186567	0.0338983	0.0233463	0.0185185	0.0245614	0.0112045	0.0393013	0.0422535	0.0298507	0.0534979	0.0621762	0.0456432	0.161172	1	0.00711462	0.0115607	0.0225776	0.00970089	0.9113	1	0.0964824	1	1	1	0.0102669	0.0219298	0.0673077	0.0111732	0.0195312	0.0104167	0.0458404	0.0463744	0	0	7.63592e-05	0	0	0	0.0334899	0.0542636	0.0104167	0.00956938	0.610309	0	0	0.04158	0.1	0	0.0103627
582	0.0186567	0.0338983	0.0233463	0.0185185	0.0245614	0.0112045	0.0393013	0.0422535	0.0298507	0.0534979	0.0569948	0.0456432	0.173993	1	0.00632411	0.0115607	0.0225776	0.00970089	0.9113	1	0.0964824	1	1	1	0.0102669	0.0204678	0.0673077	0.0111732	0.015625	0.0104167	0.0373514	0.0463744	0	0	7.63592e-05	0	0	0	0.0301105	0.0542636	0.0104167	0.0119617	0.610309	0	0	0.037422	0.1	0	0.0103627
583	0.0149254	0.0338983	0.0233463	0.0185185	0.0245614	0.0112045	0.0393013	0.0375587	0.0298507	0.0493827	0.0569948	0.0456432	0.184982	1	0.00711462	0.0132122	0.0225776	0.00970089	0.9113	1	0.0964824	1	1	1	0.00616016	0.0204678	0.0673077	0.0111732	0.0117188	0.0104167	0.0373514	0.0472175	0	0	0	0	0	0	0.0301105	0.0542636	0.00892857	0.00956938	0.612371	0	0	0.04158	0.1	0	0.0103627
584	0.0149254	0.0338983	0.0233463	0.0185185	0.0245614	0.0112045	0.0349345	0.0375587	0.0298507	0.0493827	0.0569948	0.0414938	0.188645	1	0.00711462	0.014038	0.0225776	0.00970089	0.9113	1	0.0964824	1	1	1	0.00616016	0.0204678	0.0673077	0.0111732	0.0117188	0.0104167	0.0373514	0.0472175	0	0	0	0	0	0	0.0301105	0.0542636	0.00892857	0.00956938	0.612371	0	0	0.04158	0.1	0	0.0103627
585	0.0149254	0.0338983	0.0233463	0.0185185	0.0210526	0.0112045	0.0349345	0.0375587	0.0298507	0.0493827	0.0518135	0.0414938	0.173077	1	0.00711462	0.00990917	0.0206961	0.00970089	0.9113	1	0.0964824	1	1	1	0.0102669	0.0204678	0	0.0223464	0.0195312	0.0104167	0.0220713	0.049747	0	0	0.000229078	0	0	0	0.0301105	0.0542636	0.00892857	0	0.612371	0	0	0.031185	0.1	0	0.0103627
586	0.0149254	0.0338983	0.0233463	0.0185185	0.0210526	0.0112045	0.0349345	0.0375587	0.0298507	0.0493827	0.0518135	0.0373444	0.173993	1	0.00711462	0.0090834	0.0206961	0.00970089	0.9113	1	0.0964824	1	1	1	0.0102669	0.0219298	0.0192308	0.0167598	0.0273438	0.0104167	0.0254669	0.049747	0	0	0.000305437	0	0	0	0.0301105	0.0542636	0.00892857	0.0167464	0.612371	0	0	0.037422	0.103704	0	0.00518135
587	0.0149254	0.0338983	0.0233463	0.0148148	0.0210526	0.0112045	0.0349345	0.0328638	0.0298507	0.0452675	0.0518135	0.0373444	0.168498	1	0.00711462	0.00660611	0.0188147	0.00970089	0.9113	1	0.0964824	1	1	1	0.0143737	0.0204678	0.0192308	0.0223464	0.0351562	0.0104167	0.0186757	0.0708263	0	0	7.63592e-05	0	0	0	0.0301105	0.0542636	0.00892857	0	0.612371	0	0	0.031185	0.0907407	0	0.00518135
588	0.0149254	0.0338983	0.0233463	0.0148148	0.0210526	0.0112045	0.0305677	0.0328638	0.0298507	0.0452675	0.0518135	0.0373444	0.17033	1	0.00711462	0.00660611	0.0169332	0.00970089	0.9113	1	0.0964824	1	1	1	0.0143737	0.0219298	0.0288462	0.027933	0.03125	0.0104167	0.0220713	0.06914	0	0	7.63592e-05	0	0	0	0.0301105	0.0542636	0.00892857	0.00717703	0.612371	0	0	0.033264	0.0907407	0	0.00518135
589	0.0149254	0.0338983	0.0272374	0.0148148	0.0210526	0.0112045	0.0305677	0.0328638	0.0298507	0.0493827	0.0518135	0.0373444	0.190476	1	0.00711462	0.00495458	0.0150517	0.00970089	0.9113	1	0.0964824	1	1	1	0.0143737	0.0219298	0.0288462	0.0223464	0.0234375	0.0138889	0.00169779	0.06914	0	0	0	0	0	0	0.0301105	0.0542636	0.00892857	0.00956938	0.612371	0	0	0.04158	0.0833333	0	0.0103627
590	0.0186567	0.0338983	0.0272374	0.0148148	0.0210526	0.00840336	0.0305677	0.0328638	0.0298507	0.0493827	0.0518135	0.0373444	0.193223	1	0.00711462	0.00495458	0.0131703	0.00970089	0.9113	1	0.0964824	1	1	1	0.0143737	0.0204678	0.0288462	0.0223464	0.0234375	0.0138889	0	0.0590219	0	0	0	0	0	0	0.0301105	0.0542636	0.00892857	0.0167464	0.612371	0	0	0.035343	0.0833333	0	0.0103627
591	0.0186567	0.0338983	0.0272374	0.0148148	0.0210526	0.00840336	0.0349345	0.0328638	0.0298507	0.0493827	0.0569948	0.0414938	0.190476	1	0.00632411	0.00660611	0.0150517	0.00808407	0.9113	1	0.0964824	1	1	1	0.0143737	0.0190058	0.00961538	0.0223464	0.0195312	0.0138889	0	0.0590219	0	0	0	0	0	0	0.0301105	0.0465116	0.00892857	0.0167464	0.612371	0	0	0.04158	0.0833333	0	0.0103627
592	0.0223881	0.0338983	0.0272374	0.0148148	0.0210526	0.00840336	0.0349345	0.0375587	0.0298507	0.0493827	0.0569948	0.0414938	0.192308	1	0.00632411	0.00660611	0.0150517	0.00808407	0.9113	1	0.0964824	1	1	1	0.0102669	0.0160819	0.0432692	0.0167598	0.015625	0.0138889	0	0.0556492	0	0	0	0	0	0	0.0267311	0.0465116	0.00744048	0.00956938	0.612371	0	0	0.037422	0.0907407	0	0.0103627
593	0.0223881	0.0338983	0.0272374	0.0148148	0.0175439	0.00840336	0.0349345	0.0375587	0.0298507	0.0493827	0.0569948	0.0414938	0.209707	1	0.00711462	0.899257	0.0206961	0.00808407	0.9113	1	0.0964824	1	1	1	0.0102669	0.0160819	0.0576923	0.0167598	0.015625	0.0138889	0	0.0489039	0	0	0	0	0	0	0.0301105	0.0465116	0.00744048	0.00956938	0.612371	0	0	0.039501	0.1	0	0.0103627
594	0.0223881	0.0338983	0.0272374	0.0148148	0.0210526	0.00840336	0.0349345	0.0375587	0.0298507	0.0493827	0.0569948	0.0373444	0.20696	1	0.00632411	0.899257	0.0206961	0.00808407	0.9113	1	0.0964824	1	1	1	0.0102669	0.0175439	0.0576923	0.0167598	0.015625	0.0138889	0	0.049747	0	0	0	0	0	0	0.0301105	0.0465116	0.00892857	0.00956938	0.612371	0	0	0.037422	0.1	0	0.0103627
595	0.0223881	0.0338983	0.0233463	0.0148148	0.0245614	0.00840336	0.0349345	0.0328638	0.0298507	0.0452675	0.0569948	0.0373444	0.212454	1	0.00711462	0.899257	0.0206961	0.00808407	0.9113	1	0.0964824	1	1	1	0.0102669	0.0160819	0.0625	0.0167598	0.015625	0.0138889	0	0.0480607	0	0	0	0	0	0	0.0301105	0.0465116	0.00744048	0.00956938	0.614433	0	0	0.037422	0.1	0	0.0103627
596	0.0223881	0.0338983	0.0233463	0.0148148	0.0245614	0.00840336	0.0305677	0.0328638	0.0298507	0.0493827	0.0569948	0.0373444	0.212454	1	0.00711462	0.899257	0.0206961	0.00808407	0.9113	1	0.0964824	1	1	1	0.0102669	0.0175439	0.0625	0.0111732	0.015625	0.0138889	0	0.0480607	0	0	0	0	0	0	0.0301105	0.0465116	0.00744048	0.00956938	0.614433	0	0	0.035343	1	0	0.0103627
597	0.0223881	0.0338983	0.0233463	0.0148148	0.0210526	0.00840336	0.0305677	0.0328638	0.0298507	0.0452675	0.0518135	0.0373444	0.20696	1	0.00711462	0.899257	0.0206961	0.00808407	0.9113	1	0.0964824	1	1	1	0.0102669	0.0175439	0.0625	0.0111732	0.015625	0.0104167	0	0.0480607	0	0	0	0	0	0	0.0267311	0.0465116	0.00744048	0.00956938	0.614433	0	0	0.035343	1	0	0.0103627
598	0.0261194	0.0338983	0.0272374	0.0148148	0.0245614	0.00840336	0.0305677	0.0328638	0.0298507	0.0452675	0.0518135	0.0373444	0.208791	1	0.00632411	0.899257	0.0225776	0	0.9113	1	0.0964824	1	1	1	0.00821355	0.0131579	0.0673077	0.0111732	0.015625	0.0104167	0	0.049747	0	0	0	0	0	0	0.0267311	0.0387597	0.00744048	0.0119617	0.614433	0	0	0.045738	1	0	0.0103627
599	0.0261194	0.0338983	0.0272374	0.0148148	0.0245614	0.00840336	0.0305677	0.0328638	0.0298507	0.0452675	0.0518135	0.0373444	0.207875	1	0.00632411	0.899257	0.0225776	0.00646726	0.9113	1	0.0964824	1	1	1	0.00205339	0.0146199	0.0673077	0.0111732	0.015625	0.0104167	0	0.049747	0	0	0	0	0	0	0.0267311	0.0387597	0.00744048	0.0119617	0.614433	0	0	0.047817	1	0	0.0103627
600	0.764925	0.683616	0.754864	0.825926	0.621053	0.509804	0.563319	0.840376	0.574627	0.588477	0.813472	0.838174	0.673077	0.700275	0.560474	0.601982	0.601129	0.630558	0.676792	0.724324	0.582412	0.759286	0.672831	0.731183	0.73922	0.921053	0.528846	0.544693	0.566406	0.565972	0.95416	0.722597	0.964428	0.967113	0.856139	1	0.683299	0.755525	0.935791	0.705426	0.950893	0.645933	0.210309	0.879265	0.375	0.4158	0.892593	0.723404	0.927461
601	0.764925	0.683616	0.750973	0.822222	0.621053	0.507003	0.563319	0.840376	0.570896	0.584362	0.80829	0.838174	0.673077	0.702108	0.563636	0.606936	0.60301	0.638642	0.678615	0.724324	0.582412	0.756429	0.679943	0.732527	0.75154	0.932749	0.528846	0.555866	0.621094	0.611111	0.947368	0.713322	0.96791	0.965281	0.832239	1	0.678104	0.755525	0.932412	0.689922	0.950893	0.598086	0.218557	0.879265	0.375	0.378378	0.892593	0.702128	0.943005
602	0.761194	0.680791	0.750973	0.818519	0.617544	0.507003	0.558952	0.835681	0.570896	0.584362	0.803109	0.834025	0.678571	0.707608	0.565217	0.613543	0.611477	0.641876	0.681045	0.727027	0.582915	0.757857	0.677098	0.741935	0.755647	0.935673	0.528846	0.561453	0.59375	0.5625	0.945671	0.682125	0.967413	0.965679	0.838195	1	0.675939	0.755525	0.925653	0.705426	0.950893	0.636364	0.216495	0.879265	0.375	0.392931	0.892593	0.702128	0.953368
603	0.761194	0.680791	0.747082	0.814815	0.617544	0.504202	0.558952	0.835681	0.567164	0.580247	0.797927	0.834025	0.685897	0.716774	0.565217	0.610239	0.611477	0.646726	0.67983	0.728378	0.581407	0.756429	0.669986	0.743952	0.75154	0.929825	0.528846	0.544693	0.585938	0.572917	0.940577	0.667791	0.968905	0.969183	0.853619	1	0.677346	0.755525	0.922274	0.689922	0.950893	0.590909	0.216495	0.879265	0.375	0.413721	0.883333	0.702128	0.945596
604	0.757463	0.680791	0.747082	0.814815	0.617544	0.504202	0.558952	0.835681	0.567164	0.580247	0.797927	0.834025	0.685897	0.718607	0.56917	0.611891	0.596425	0.648343	0.6774	0.727027	0.582915	0.759286	0.662873	0.75	0.743326	0.916667	0.519231	0.550279	0.601562	0.5625	0.943973	0.664418	0.967662	0.967351	0.866219	1	0.677563	0.755525	0.922274	0.697674	0.950893	0.562201	0.257732	0.879265	0.375	0.399168	0.883333	0.702128	0.937824
605	0.753731	0.677966	0.743191	0.811111	0.610526	0.504202	0.558952	0.835681	0.567164	0.580247	0.792746	0.829876	0.694139	0.72594	0.572332	0.610239	0.608655	0.656427	0.674362	0.724324	0.579899	0.756429	0.665007	0.745968	0.731006	0.907895	0.514423	0.550279	0.59375	0.53125	0.943973	0.663575	0.969403	0.968944	0.83682	1	0.678645	0.755525	0.922274	0.697674	0.950893	0.452153	0.195876	0.879265	0.375	0.288981	0.883333	0.702128	0.92487
606	0.753731	0.677966	0.743191	0.811111	0.607018	0.504202	0.558952	0.835681	0.563433	0.576132	0.792746	0.829876	0.694139	0.72594	0.577075	0.611891	0.611477	0.656427	0.673755	0.724324	0.579899	0.757143	0.671408	0.745968	0.726899	0.902047	0.514423	0.53352	0.574219	0.538194	0.921902	0.661889	0.9699	0.974837	0.839646	1	0.681676	0.755525	0.918894	0.697674	0.950893	0.394737	0.183505	0.879265	0.375	0.284823	0.883333	0.702128	0.914508
607	0.753731	0.677966	0.7393	0.811111	0.607018	0.504202	0.558952	0.835681	0.563433	0.576132	0.792746	0.829876	0.695055	0.725023	0.575494	0.611891	0.611477	0.655618	0.671932	0.722297	0.578894	0.762143	0.674253	0.745296	0.726899	0.899123	0.514423	0.522346	0.546875	0.565972	0.923599	0.666105	0.969154	0.974677	0.839111	1	0.680918	0.755525	0.915515	0.697674	0.950893	0.354067	0.212371	0.879265	0.375	0.237006	0.883333	0.702128	0.911917
608	0.753731	0.677966	0.7393	0.807407	0.607018	0.504202	0.558952	0.835681	0.563433	0.576132	0.896373	0.829876	0.690476	0.71494	0.570751	0.610239	0.604892	0.64996	0.670109	0.718919	0.580402	0.762857	0.677098	0.744624	0.73922	0.918129	0.514423	0.51676	0.539062	0.642361	0.938879	0.637437	0.96791	0.971811	0.87332	1	0.677238	0.755525	0.915515	0.705426	0.950893	0.337321	0.224742	0.87664	0.375	0.22869	0.883333	0.680851	0.927461
609	0.753731	0.677966	0.743191	0.807407	0.607018	0.504202	0.558952	0.840376	0.567164	0.576132	0.787565	0.829876	0.685897	0.709441	0.570751	0.610239	0.601129	0.646726	0.668894	0.720946	0.580402	0.764286	0.681366	0.74328	0.735113	0.921053	0.514423	0.51676	0.546875	0.583333	0.938879	0.662732	0.966169	0.972766	0.87164	1	0.675398	0.755525	0.915515	0.72093	0.950893	0.37799	0.195876	0.88189	0.375	0.2079	0.892593	0.702128	0.930052
610	0.757463	0.680791	0.747082	0.811111	0.610526	0.507003	0.563319	0.840376	0.570896	0.580247	0.787565	0.834025	0.684066	0.709441	0.56917	0.608588	0.60301	0.643492	0.670109	0.72973	0.582412	0.767857	0.685633	0.748656	0.735113	0.923977	0.524038	0.511173	0.527344	0.583333	0.950764	0.657673	0.964925	0.971652	0.866677	1	0.67529	0.755525	0.915515	0.736434	0.950893	0.361244	0.235052	0.879265	0.375	0.214137	0.892593	0.680851	0.932642
611	0.761194	0.680791	0.747082	0.811111	0.614035	0.509804	0.567686	0.840376	0.570896	0.584362	0.792746	0.838174	0.68315	0.705775	0.570751	0.610239	0.603951	0.643492	0.669502	0.731081	0.578894	0.764286	0.684211	0.750672	0.726899	0.921053	0.528846	0.511173	0.527344	0.607639	0.96944	0.662732	0.963184	0.966077	0.856521	1	0.679294	0.755525	0.915515	0.736434	0.950893	0.363636	0.224742	0.88189	0.385417	0.224532	0.883333	0.702128	0.927461
612	0.764925	0.680791	0.750973	0.814815	0.617544	0.509804	0.572052	0.840376	0.574627	0.584362	0.792746	0.838174	0.673077	0.702108	0.571542	0.601982	0.60301	0.638642	0.671932	0.737162	0.592965	0.770714	0.684211	0.764113	0.718686	0.906433	0.528846	0.494413	0.53125	0.604167	0.971138	0.645868	0.963682	0.964963	0.867746	1	0.679835	0.755525	0.915515	0.736434	0.950893	0.334928	0.23299	0.884514	0.40625	0.245322	0.883333	0.702128	0.914508
613	0.764925	0.683616	0.750973	0.814815	0.617544	0.512605	0.572052	0.840376	0.574627	0.584362	0.792746	0.842324	0.673077	0.702108	0.571542	0.60033	0.60301	0.638642	0.672539	0.739189	0.592965	0.770714	0.681366	0.765457	0.718686	0.902047	0.528846	0.505587	0.542969	0.631944	0.976231	0.644182	0.963184	0.966476	0.861714	1	0.680377	0.755525	0.915515	0.728682	0.950893	0.308612	0.226804	0.895013	0.40625	0.241164	0.883333	0.702128	0.80829
614	0.764925	0.683616	0.754864	0.814815	0.617544	0.512605	0.572052	0.840376	0.574627	0.584362	0.792746	0.842324	0.671245	0.702108	0.56996	0.597027	0.599247	0.637025	0.669502	0.739189	0.58593	0.765	0.672831	0.760081	0.722793	0.899123	0.528846	0.505587	0.523438	0.642361	0.976231	0.641653	0.962935	0.965281	0.905009	1	0.68265	0.755525	0.912135	0.713178	0.950893	0.368421	0.2	0.892388	0.40625	0.286902	0.883333	0.702128	0.909326
615	0.764925	0.683616	0.750973	0.814815	0.617544	0.512605	0.572052	0.840376	0.574627	0.584362	0.792746	0.842324	0.671245	0.703941	0.566798	0.593724	0.597366	0.638642	0.668894	0.738514	0.586432	0.762143	0.669275	0.75336	0.718686	0.902047	0.524038	0.494413	0.523438	0.600694	0.977929	0.634907	0.965174	0.968944	0.855376	1	0.682325	0.755525	0.901997	0.705426	0.950893	0.370813	0.208247	0.905512	0.40625	0.268191	0.883333	0.702128	0.914508
616	0.761194	0.680791	0.747082	0.811111	0.614035	0.507003	0.567686	0.840376	0.570896	0.584362	0.787565	0.842324	0.674908	0.702108	0.561265	0.60033	0.593603	0.644301	0.671324	0.739189	0.596482	0.761429	0.677809	0.748656	0.735113	0.913743	0.524038	0.53352	0.5625	0.53125	0.983022	0.662732	0.968408	0.967351	0.857514	1	0.681567	0.755525	0.895238	0.705426	0.950893	0.325359	0.237113	0.905512	0.40625	0.280665	0.892593	0.702128	0.92487
617	0.761194	0.680791	0.747082	0.811111	0.614035	0.507003	0.563319	0.835681	0.567164	0.580247	0.782383	0.838174	0.674908	0.702108	0.558103	0.597027	0.585136	0.635408	0.671932	0.741892	0.584422	0.755	0.70128	0.740591	0.75154	0.925439	0.524038	0.555866	0.578125	0.586806	0.983022	0.662732	0.968905	0.96759	0.851787	1	0.681567	0.755525	0.895238	0.705426	0.950893	0.327751	0.189691	0.905512	0.40625	0.309771	0.892593	0.702128	0.948187
618	0.757463	0.677966	0.747082	0.807407	0.610526	0.504202	0.558952	0.835681	0.567164	0.580247	0.782383	0.838174	0.675824	0.703941	0.555731	0.597027	0.583255	0.638642	0.670109	0.739189	0.578894	0.750714	0.66643	0.735215	0.747433	0.926901	0.519231	0.550279	0.582031	0.590278	0.983022	0.662732	0.9699	0.971572	0.868968	1	0.680593	0.755525	0.895238	0.705426	0.950893	0.413876	0.204124	0.892388	0.40625	0.380457	0.892593	0.702128	0.937824
619	0.757463	0.677966	0.743191	0.807407	0.607018	0.504202	0.558952	0.835681	0.567164	0.580247	0.777202	0.838174	0.675824	0.704858	0.558103	0.60033	0.583255	0.637025	0.668287	0.736486	0.574874	0.740714	0.687055	0.731183	0.735113	0.916667	0.519231	0.53352	0.558594	0.576389	0.976231	0.652614	0.971891	0.971333	0.829337	1	0.682541	0.755525	0.901997	0.713178	0.950893	0.416268	0.245361	0.900262	0.40625	0.363825	0.892593	0.702128	0.930052
620	0.753731	0.677966	0.743191	0.803704	0.607018	0.501401	0.558952	0.835681	0.567164	0.576132	0.777202	0.834025	0.673077	0.707608	0.560474	0.60033	0.585136	0.637025	0.667072	0.735135	0.572864	0.739286	0.687055	0.727823	0.731006	0.910819	0.514423	0.522346	0.539062	0.607639	0.976231	0.652614	0.971891	0.972209	0.852092	1	0.682108	0.755525	0.901997	0.713178	0.950893	0.41866	0.241237	0.900262	0.40625	0.384615	0.883333	0.702128	0.92228
621	0.753731	0.675141	0.7393	0.8	0.603509	0.498599	0.558952	0.830986	0.563433	0.576132	0.772021	0.834025	0.67033	0.704858	0.564427	0.597027	0.587959	0.637025	0.666464	0.731757	0.605025	0.737857	0.677098	0.724462	0.726899	0.907895	0.509615	0.505587	0.550781	0.534722	0.988115	0.703204	0.974378	0.97412	0.862324	1	0.683083	0.755525	0.895238	0.713178	0.950893	0.413876	0.241237	0.905512	0.40625	0.426195	0.892593	0.702128	0.919689
622	0.746269	0.672316	0.735409	0.796296	0.6	0.495798	0.550218	0.830986	0.559701	0.567901	0.766839	0.829876	0.673077	0.703941	0.566008	0.593724	0.592662	0.638642	0.660996	0.727703	0.579899	0.734286	0.679232	0.72379	0.726899	0.906433	0.504808	0.544693	0.59375	0.576389	0.988115	0.703204	0.977114	0.971731	0.857896	1	0.683083	0.755525	0.901997	0.713178	0.950893	0.514354	0.241237	0.905512	0.40625	0.39501	0.892593	0.702128	0.914508
623	0.742537	0.672316	0.731518	0.792593	0.596491	0.495798	0.545852	0.826291	0.559701	0.567901	0.761658	0.829876	0.671245	0.707608	0.566008	0.593724	0.591722	0.638642	0.658566	0.722973	0.579899	0.729286	0.688478	0.721774	0.722793	0.906433	0.5	0.51676	0.574219	0.597222	0.988115	0.703204	0.977861	0.980172	0.830788	1	0.683732	0.755525	0.898618	0.705426	0.950893	0.409091	0.212371	0.905512	0.40625	0.4158	0.892593	0.702128	0.914508
624	0.0261194	0.0310734	0.0272374	0.0148148	0.0245614	0.00840336	0.0305677	0.028169	0.0261194	0.0452675	0.0569948	0.033195	0.212454	1	0.00632411	0.899257	0.0244591	0.00808407	0.9113	1	0.0964824	1	1	1	0	0.0175439	0.0961538	0	0	0.00347222	0	0.0564924	0	0	7.63592e-05	0	0	0	0.0199723	0.0387597	0.00595238	0.00956938	0.612371	0	0	0.047817	0.0925926	0	0
625	0.0261194	0.0310734	0.0272374	0.0148148	0.0245614	0.00840336	0.0262009	0.028169	0.0223881	0.0411523	0.0518135	0.033195	0.212454	1	0.00632411	0.899257	0.0244591	0.00808407	0.9113	1	0.0964824	1	1	1	0	0.0175439	0.0961538	0	0	0.00347222	0	0.0581788	0	0	7.63592e-05	0	0	0	0.0233517	0.0310078	0.00595238	0.00956938	0.612371	0	0	0.045738	0.0925926	0	0
626	0.0261194	0.0310734	0.0272374	0.0185185	0.0245614	0.00840336	0.0262009	0.0234742	0.0223881	0.0411523	0.0518135	0.0290456	0.217033	1	0.00632411	0.899257	0.0263405	0.00808407	0.9113	1	0.0964824	1	1	1	0	0.0175439	0.110577	0	0	0	0	0.0590219	0	0	0.000381796	0	0	0	0.0199723	0.0310078	0.00595238	0.00717703	0.610309	0	0	0.047817	0.111111	0	0
627	0.0261194	0.0310734	0.0272374	0.0222222	0.0245614	0.00840336	0.0218341	0.0187793	0.0186567	0.0411523	0.0518135	0.0290456	0.215201	1	0.00632411	0.899257	0.028222	0.00808407	0.9113	1	0.0964824	1	1	1	0	0.0175439	0.120192	0	0	0	0	0.044688	0	0	0.000305437	0	0	0	0.0165929	0.0232558	0.00446429	0.00956938	0.610309	0	0	0.045738	0.111111	0	0
628	0.0261194	0.0282486	0.0311284	0.0259259	0.0175439	0.0112045	0.0218341	0.0187793	0.0186567	0.037037	0.0518135	0.0290456	0.225275	1	0.00632411	0.899257	0.028222	0.00808407	0.9113	1	0.0964824	1	1	1	0	0.0190058	0.120192	0	0	0	0	0.0994941	0	0	0.000381796	0	0	0	0.0165929	0.0232558	0.00297619	0.00956938	0.610309	0	0	0.047817	0.111111	0	0
629	0.0261194	0.0282486	0.0311284	0.0259259	0.0175439	0.0112045	0.0218341	0.0140845	0.0149254	0.037037	0.0518135	0.0248963	0.215201	1	0.00711462	0.899257	0.0301035	0.00970089	0.9113	1	0.0964824	1	1	1	0	0.0175439	0.115385	0	0	0	0	0.129848	0	0	0.000381796	0	0	0	0.0165929	0.0232558	0.00297619	0.00717703	0.610309	0	0	0.047817	0.111111	0	0
630	0.0261194	0.0282486	0.0311284	0.0259259	0.0175439	0.0112045	0.0174672	0.0140845	0.0149254	0.0329218	0.0466321	0.0248963	0.212454	1	0.00711462	0.899257	0.0301035	0.00970089	0.9113	1	0.0964824	1	1	1	0	0.0175439	0.120192	0	0	0	0	0.24199	0	0	0.000381796	0	0	0	0.0165929	0.0232558	0.00297619	0.0119617	0.612371	0	0	0.045738	0.111111	0	0
631	0.0223881	0.0282486	0.0311284	0.0259259	0.0175439	0.0140056	0.0174672	0.00938967	0.011194	0.0329218	0.0466321	0.0248963	0.212454	1	0.00711462	0.899257	0.028222	0.00970089	0.9113	1	0.0964824	1	1	1	0	0.0175439	0.120192	0	0	0	0	0.257167	0	0	0.000381796	0	0	0	0.0165929	0.0232558	0.00297619	0.00956938	0.612371	0	0	0.039501	0.111111	0	0
632	0.0223881	0.0254237	0.0311284	0.0259259	0.0140351	0.0140056	0.0131004	0.00938967	0.011194	0.0288066	0.0414508	0.0207469	0.208791	1	0.00711462	0.899257	0.0376294	0.00970089	0.9113	1	0.0964824	1	1	1	0	0.0160819	0.0480769	0	0	0	0	0.27656	0	0	0.000381796	0	0	0	0.0199723	0.0232558	0.00446429	0.00239234	0.606186	0	0	0.035343	0.111111	0	0
633	0.0186567	0.0254237	0.0350195	0.0259259	0.0140351	0.0140056	0.0131004	0.00938967	0.011194	0.0288066	0.0414508	0.0207469	0.20696	1	0.00711462	0.899257	0.0319849	0.00970089	0.9113	1	0.0964824	1	1	1	0	0.0160819	0.0480769	0	0	0	0	0.275717	0	0	0.000381796	0	0	0	0.0199723	0.0232558	0.00446429	0.00717703	0.610309	0	0	0.033264	0.111111	0	0
634	0.0149254	0.0254237	0.0350195	0.0296296	0.0175439	0.0168067	0.0131004	0.00469484	0.011194	0.0288066	0.0362694	0.0165975	0.192308	1	0.00632411	0.899257	0.028222	0.00808407	0.9113	1	0.0964824	1	1	1	0	0.0146199	0.0913462	0	0	0	0	0.277403	0	0	0.000687233	0	0	0	0.0165929	0.0232558	0.00446429	0.0167464	0.610309	0	0	0.049896	0.111111	0	0
635	0.00746269	0.0254237	0.0350195	0.0296296	0.0140351	0.0168067	0.00873362	0.00469484	0.011194	0.0288066	0.0362694	0.0124481	0.18315	1	0.00632411	0.899257	0.0244591	0.00808407	0.9113	1	0.0964824	1	1	1	0	0.0146199	0.0913462	0	0	0	0	0.27403	0	0	0.000229078	0	0	0	0.0165929	0.0232558	0.00297619	0.00239234	0.608247	0	0	0.039501	0.111111	0	0
636	0.00373134	0.0254237	0.0350195	0.0296296	0.0140351	0.0140056	0.00436681	0	0.011194	0.0288066	0.0362694	0.00829876	0.18315	1	0.00632411	0.899257	0.0235183	0.00808407	0.9113	1	0.0964824	1	1	1	0	0.0146199	0.0913462	0	0	0	0	0.270658	0	0	0.000229078	0	0	0	0.0165929	0.0232558	0.00297619	0.00239234	0.608247	0	0	0.035343	0.111111	0	0
637	0.00373134	0.0254237	0.0350195	0.0296296	0.0175439	0.0168067	0.00436681	0	0.011194	0.0288066	0.0362694	0.00829876	0.18315	1	0.00632411	0.899257	0.0235183	0.00808407	0.9113	1	0.0964824	1	1	1	0	0	0.0865385	0	0	0	0	0.270658	0	0	0.000229078	0	0	0	0.0165929	0.0232558	0.00297619	0.00239234	0.505155	0	0	0.035343	0.111111	0	0
638	0.00746269	0.0254237	0.0389105	0.0296296	0.0175439	0.0168067	0.00873362	0.00469484	0.011194	0.0246914	0.0362694	0.0124481	0.18315	1	0.00632411	0.899257	0.0225776	0.00808407	0.9113	1	0.0964824	1	1	1	0	0.0175439	0.0865385	0	0	0	0	0.187184	0	0	7.63592e-05	0	0	0	0.0165929	0.0155039	0.00297619	0.00956938	0.614433	0	0	0.04158	0.111111	0	0
639	0.00746269	0.0254237	0.0389105	0.0296296	0.0175439	0.0168067	0.00873362	0.00938967	0.011194	0.0246914	0.0362694	0.0124481	0.217033	1	0.00632411	0.899257	0.0206961	0.00808407	0.9113	1	0.0964824	1	1	1	0	0.0175439	0.0865385	0	0	0	0	0.145025	0	0	7.63592e-05	0	0	0	0.0165929	0.0155039	0.00297619	0.0119617	0.610309	0	0	0.039501	0.111111	0	0
640	0.00746269	0.0254237	0.0389105	0.0296296	0.0140351	0.0168067	0.00873362	0.00938967	0.011194	0.0246914	0.0362694	0.0124481	0.217033	1	0.00632411	0.899257	0.0235183	0.00808407	0.9113	1	0.0964824	1	1	1	0	0.0175439	0.0865385	0	0	0	0	0.145025	0	0	7.63592e-05	0	0	0	0.0165929	0.0155039	0.00297619	0.00956938	0.608247	0	0	0.039501	0.111111	0	0
641	0.00373134	0.0254237	0.0389105	0.0259259	0.0175439	0.0168067	0.00873362	0.00938967	0.011194	0.0205761	0.0362694	0.0165975	0.206044	1	0.00632411	0.899257	0.028222	0.00808407	0.9113	1	0.0964824	1	1	1	0	0.0175439	0.0913462	0	0	0.00694444	0	0.139123	0	0	7.63592e-05	0	0	0	0.0165929	0.0155039	0.00297619	0.0119617	0.612371	0	0	0	0.111111	0	0
642	0.00373134	0.0254237	0.0389105	0.0259259	0.0140351	0.0168067	0.00873362	0.00938967	0.011194	0.0205761	0.0362694	0.0165975	0.222527	1	0.00632411	0.899257	0.028222	0.00808407	0.9113	1	0.0964824	1	1	1	0	0.0175439	0.0913462	0	0	0.00694444	0	0.139123	0	0	7.63592e-05	0	0	0	0.0165929	0.0155039	0.00297619	0.0119617	0.612371	0	0	0	0.111111	0	0
643	0.00373134	0.0254237	0.0389105	0.0259259	0.0140351	0.0168067	0.00873362	0.00938967	0.011194	0.0205761	0.0362694	0.0165975	0.198718	1	0.00632411	0.899257	0.0301035	0.00808407	0.9113	1	0.0964824	1	1	1	0	0.0160819	0.0913462	0	0	0.00694444	0	0.139123	0	0	7.63592e-05	0	0	0	0.0165929	0.0155039	0.00297619	0.0119617	0.610309	0	0	0.037422	0.111111	0	0
644	0.00373134	0.0254237	0.0389105	0.0259259	0.0140351	0.0168067	0.00873362	0.00938967	0	0.0329218	0.015544	0.0124481	0.165751	1	0.00632411	0.899257	0.0301035	0.00808407	0.9113	1	0.0964824	1	1	1	0	0.0160819	0.0913462	0	0	0.00694444	0	0.139123	0	0	7.63592e-05	0	0	0	0.0165929	0.0155039	0.00297619	0.00956938	0.610309	0	0	0.039501	0.111111	0	0
645	0.00373134	0.0254237	0.0389105	0.0259259	0.0140351	0.0168067	0.00873362	0.00938967	0	0.0205761	0.0259067	0.0124481	0.157509	1	0.00632411	0.899257	0.0301035	0.00808407	0.9113	1	0.0964824	1	1	1	0	0.0160819	0.0913462	0	0	0.00694444	0	0.139123	0	0	7.63592e-05	0	0	0	0.0132135	0.0155039	0.0014881	0.00956938	0.610309	0	0	0.039501	0.111111	0	0
646	0	0.0225989	0.0350195	0.0222222	0.00701754	0.0140056	0.00873362	0.00938967	0.011194	0.0205761	0.0259067	0.0124481	0.135531	1	0.00632411	0.899257	0.0301035	0.00808407	0.9113	1	0.0964824	1	1	1	0	0.0160819	0.0913462	0	0	0.0104167	0	0.139123	0	0	7.63592e-05	0	0	0	0.0132135	0.0155039	0.0014881	0.00956938	0.610309	0	0	0.039501	0.111111	0	0
647	0	0.0225989	0.0350195	0.0222222	0.00701754	0.0140056	0.00873362	0.00938967	0.011194	0.0205761	0.0259067	0.0124481	0.134615	1	0.00632411	0.899257	0.0301035	0.00808407	0.9113	1	0.0964824	1	1	1	0	0.0160819	0.0913462	0	0	0.0104167	0	0.139123	0	0	7.63592e-05	0	0	0	0.0132135	0.0155039	0.0014881	0.00956938	0.610309	0	0	0.039501	0.111111	0	0
648	0.731343	0.661017	0.735409	0.788889	0.578947	0.478992	0.528384	0.807512	0.567164	0.563786	0.715026	0.817427	0.687729	0.712191	0.561265	0.593724	0.651929	0.640259	0.675577	0.729054	0.584422	0.748571	0.69559	0.749328	0.743326	0.910819	0.5	0.567039	0.613281	0.524306	0.947368	0.734401	0.981841	0.9828	0.855757	1	0.673017	0.75518	0.908756	0.72093	0.950893	0.617225	0.230928	0.866142	0.364583	0.316008	0.87037	0.659574	0.927461
649	0.727612	0.661017	0.731518	0.785185	0.578947	0.478992	0.524017	0.807512	0.567164	0.563786	0.709845	0.813278	0.691392	0.716774	0.562846	0.595376	0.662277	0.643492	0.675577	0.729054	0.582915	0.748571	0.694168	0.750672	0.735113	0.907895	0.495192	0.572626	0.621094	0.538194	0.933786	0.73946	0.982587	0.983596	0.858048	1	0.672475	0.75518	0.908756	0.728682	0.950893	0.54067	0.280412	0.868766	0.364583	0.313929	0.87037	0.659574	0.92487
650	0.723881	0.658192	0.727626	0.781481	0.57193	0.47619	0.519651	0.802817	0.563433	0.559671	0.704663	0.809129	0.701465	0.687443	0.570751	0.605285	0.671684	0.64996	0.681652	0.731081	0.592965	0.757143	0.70697	0.760081	0.726899	0.907895	0.490385	0.544693	0.613281	0.555556	0.940577	0.725126	0.985323	0.992037	0.847587	1	0.673558	0.75518	0.915515	0.713178	0.950893	0.535885	0.284536	0.866142	0.364583	0.299376	0.87037	0.659574	0.919689
651	0.723881	0.655367	0.727626	0.777778	0.57193	0.473389	0.519651	0.798122	0.563433	0.555556	0.704663	0.809129	0.696886	0.722273	0.56996	0.608588	0.671684	0.651576	0.68226	0.731081	0.590452	0.756429	0.703414	0.757392	0.726899	0.907895	0.485577	0.539106	0.59375	0.583333	0.945671	0.724283	0.984577	0.988055	0.860644	1	0.673017	0.75518	0.915515	0.713178	0.950893	0.626794	0.230928	0.868766	0.364583	0.330561	0.87037	0.659574	0.917098
652	0.720149	0.655367	0.723735	0.777778	0.57193	0.470588	0.519651	0.798122	0.563433	0.555556	0.704663	0.809129	0.703297	0.729606	0.573913	0.613543	0.677328	0.65481	0.682868	0.733108	0.589447	0.757857	0.705548	0.754032	0.755647	0.904971	0.485577	0.555866	0.578125	0.541667	0.955857	0.671164	0.985572	0.992913	0.86011	1	0.67464	0.75518	0.908756	0.713178	0.950893	0.590909	0.239175	0.866142	0.364583	0.299376	0.87037	0.659574	0.917098
653	0.720149	0.655367	0.723735	0.777778	0.57193	0.470588	0.519651	0.798122	0.563433	0.555556	0.704663	0.809129	0.704212	0.736939	0.577075	0.618497	0.682973	0.656427	0.683475	0.731757	0.592965	0.758571	0.70697	0.754704	0.735113	0.904971	0.485577	0.555866	0.59375	0.565972	0.962649	0.731029	0.984826	0.990444	0.864462	1	0.673341	0.75518	0.912135	0.72093	0.950893	0.58134	0.263918	0.868766	0.364583	0.345114	0.87037	0.659574	0.914508
654	0.720149	0.655367	0.723735	0.777778	0.57193	0.470588	0.519651	0.798122	0.563433	0.555556	0.704663	0.804979	0.708791	0.740605	0.578656	0.620149	0.686736	0.656427	0.678007	0.730405	0.58995	0.757143	0.70128	0.754704	0.747433	0.906433	0.490385	0.555866	0.582031	0.53125	0.949066	0.727656	0.984826	0.986861	0.868891	1	0.671826	0.75518	0.912135	0.713178	0.950893	0.588517	0.265979	0.866142	0.364583	0.336798	0.888889	0.659574	0.92487
655	0.720149	0.655367	0.723735	0.777778	0.57193	0.470588	0.519651	0.798122	0.563433	0.555556	0.704663	0.809129	0.709707	0.738772	0.594466	0.629232	0.711195	0.641876	0.678007	0.72973	0.594472	0.763571	0.708393	0.754704	0.755647	0.913743	0.485577	0.561453	0.582031	0.545139	0.949066	0.709106	0.986318	0.990524	0.834071	1	0.671393	0.75518	0.915515	0.713178	0.950893	0.574163	0.272165	0.866142	0.364583	0.224532	0.888889	0.659574	0.935233
656	0.720149	0.655367	0.723735	0.777778	0.57193	0.470588	0.519651	0.798122	0.563433	0.555556	0.704663	0.809129	0.702381	0.740605	0.578656	0.623452	0.690499	0.658044	0.675577	0.728378	0.604523	0.760714	0.711238	0.760753	0.759754	0.919591	0.490385	0.572626	0.605469	0.513889	0.950764	0.680438	0.98408	0.989091	0.636072	1	0.668254	0.755525	0.915515	0.713178	0.950893	0.574163	0.280412	0.866142	0.364583	0.320166	0.888889	0.659574	0.940415
657	0.720149	0.655367	0.727626	0.777778	0.575439	0.470588	0.524017	0.798122	0.567164	0.559671	0.709845	0.809129	0.701465	0.740605	0.577866	0.620149	0.686736	0.658044	0.673147	0.72973	0.588442	0.755	0.704125	0.751344	0.759754	0.919591	0.490385	0.555866	0.589844	0.527778	0.952462	0.68887	0.985323	0.975792	0.833308	1	0.669337	0.755525	0.912135	0.728682	0.950893	0.574163	0.286598	0.866142	0.364583	0.403326	0.888889	0.659574	0.940415
658	0.723881	0.658192	0.731518	0.781481	0.578947	0.47619	0.528384	0.802817	0.570896	0.563786	0.715026	0.813278	0.70696	0.744271	0.574704	0.616846	0.682032	0.65481	0.671932	0.730405	0.582915	0.747857	0.697013	0.752016	0.753593	0.922515	0.5	0.572626	0.601562	0.506944	0.952462	0.693086	0.98408	0.969581	0.873396	1	0.667821	0.755525	0.912135	0.728682	0.950893	0.602871	0.259794	0.866142	0.364583	0.363825	0.888889	0.659574	0.943005
659	0.727612	0.661017	0.7393	0.788889	0.585965	0.478992	0.532751	0.807512	0.574627	0.567901	0.720207	0.821577	0.70696	0.742438	0.573123	0.615194	0.678269	0.653193	0.671932	0.732432	0.58392	0.747857	0.699147	0.758065	0.759754	0.925439	0.504808	0.544693	0.589844	0.527778	0.966044	0.693929	0.979851	0.96552	0.852779	1	0.669012	0.755525	0.912135	0.736434	0.950893	0.595694	0.261856	0.866142	0.364583	0.359667	0.87037	0.659574	0.945596
660	0.738806	0.666667	0.747082	0.796296	0.592982	0.484594	0.541485	0.816901	0.58209	0.576132	0.73057	0.825726	0.702381	0.738772	0.573123	0.615194	0.678269	0.653193	0.669502	0.734459	0.582412	0.746429	0.699858	0.757392	0.747433	0.922515	0.514423	0.53352	0.574219	0.520833	0.96944	0.694772	0.975622	0.966476	0.855299	1	0.671718	0.755525	0.915515	0.728682	0.950893	0.583732	0.257732	0.866142	0.364583	0.351351	0.87037	0.680851	0.935233
661	0.742537	0.666667	0.750973	0.8	0.596491	0.487395	0.541485	0.816901	0.585821	0.580247	0.735751	0.829876	0.701465	0.742438	0.573123	0.611891	0.676388	0.651576	0.670109	0.733784	0.582915	0.748571	0.69559	0.752016	0.735113	0.913743	0.514423	0.544693	0.585938	0.559028	0.967742	0.751265	0.975124	0.964326	0.844991	1	0.67464	0.755525	0.912135	0.728682	0.950893	0.600478	0.259794	0.866142	0.364583	0.328482	0.87037	0.680851	0.92487
662	0.746269	0.669492	0.754864	0.803704	0.6	0.492997	0.550218	0.821596	0.589552	0.584362	0.740933	0.834025	0.699634	0.731439	0.571542	0.611891	0.675447	0.64996	0.670717	0.735135	0.579899	0.755	0.692034	0.749328	0.731006	0.907895	0.519231	0.550279	0.59375	0.524306	0.967742	0.754637	0.975622	0.963768	0.840562	1	0.67464	0.755525	0.912135	0.72093	0.950893	0.593301	0.220619	0.866142	0.364583	0.328482	0.87037	0.680851	0.92228
663	0.75	0.672316	0.754864	0.803704	0.6	0.492997	0.550218	0.821596	0.589552	0.584362	0.740933	0.834025	0.701465	0.733272	0.56996	0.608588	0.671684	0.651576	0.667679	0.731081	0.573869	0.75	0.694879	0.74328	0.722793	0.904971	0.519231	0.539106	0.59375	0.572917	0.950764	0.75801	0.974627	0.96345	0.842853	1	0.675614	0.755525	0.912135	0.72093	0.950893	0.598086	0.259794	0.866142	0.364583	0.328482	0.87037	0.702128	0.914508
664	0.753731	0.672316	0.754864	0.807407	0.603509	0.490196	0.550218	0.821596	0.589552	0.584362	0.746114	0.834025	0.695055	0.726856	0.568379	0.606936	0.668862	0.64996	0.668894	0.733108	0.583417	0.754286	0.705548	0.74328	0.735113	0.902047	0.524038	0.539106	0.566406	0.541667	0.947368	0.713322	0.099005	0.960901	0.860186	1	0.675398	0.755525	0.908756	0.705426	0.950893	0.562201	0.259794	0.866142	0.364583	0.293139	0.87037	0.680851	0.914508
665	0.75	0.672316	0.754864	0.807407	0.603509	0.492997	0.550218	0.821596	0.589552	0.584362	0.740933	0.834025	0.699634	0.731439	0.566008	0.606936	0.66698	0.648343	0.669502	0.732432	0.582915	0.757857	0.709815	0.74328	0.743326	0.910819	0.519231	0.53352	0.582031	0.579861	0.945671	0.716695	0.975373	0.963211	0.856292	1	0.674315	0.755525	0.905377	0.705426	0.950893	0.626794	0.218557	0.866142	0.364583	0.345114	0.883333	0.680851	0.919689
666	0.746269	0.672316	0.754864	0.807407	0.603509	0.492997	0.550218	0.816901	0.589552	0.584362	0.740933	0.834025	0.696886	0.731439	0.562055	0.608588	0.668862	0.648343	0.670717	0.734459	0.585427	0.757143	0.70697	0.745968	0.747433	0.916667	0.519231	0.53352	0.574219	0.565972	0.942275	0.730185	0.975622	0.964007	0.852703	1	0.674315	0.755525	0.905377	0.713178	0.950893	0.629187	0.212371	0.866142	0.364583	0.349272	0.883333	0.680851	0.92487
667	0.746269	0.672316	0.754864	0.807407	0.603509	0.492997	0.550218	0.816901	0.589552	0.584362	0.740933	0.834025	0.699634	0.733272	0.56917	0.610239	0.669802	0.64996	0.673755	0.739189	0.594975	0.76	0.71835	0.75	0.75154	0.923977	0.519231	0.282123	0.589844	0.545139	0.945671	0.718381	0.975871	0.962096	0.86095	1	0.673233	0.755525	0.912135	0.713178	0.950893	0.605263	0.25567	0.866142	0.364583	0.301455	0.892593	0.680851	0.935233
668	0.75	0.672316	0.754864	0.803704	0.603509	0.495798	0.550218	0.816901	0.589552	0.584362	0.740933	0.834025	0.697802	0.735105	0.570751	0.615194	0.674506	0.65481	0.676792	0.733784	0.58593	0.759286	0.70697	0.74664	0.75154	0.925439	0.519231	0.555866	0.582031	0.541667	0.962649	0.674536	0.980846	0.968307	0.871029	1	0.670852	0.755525	0.912135	0.713178	0.950893	0.588517	0.257732	0.866142	0.364583	0.365904	0.894444	0.680851	0.940415
669	0.742537	0.669492	0.750973	0.8	0.6	0.492997	0.545852	0.816901	0.585821	0.580247	0.740933	0.834025	0.702381	0.742438	0.574704	0.616846	0.675447	0.656427	0.675577	0.72973	0.575377	0.752143	0.705548	0.747984	0.743326	0.919591	0.519231	0.544693	0.59375	0.579861	0.95416	0.681282	0.978856	0.967113	0.873931	1	0.671609	0.755525	0.908756	0.713178	0.950893	0.588517	0.259794	0.866142	0.364583	0.446985	0.883333	0.680851	0.932642
670	0.742537	0.669492	0.750973	0.8	0.6	0.490196	0.585153	0.812207	0.58209	0.580247	0.740933	0.829876	0.701465	0.737855	0.577866	0.620149	0.680151	0.658044	0.678007	0.725676	0.574372	0.757143	0.708393	0.751344	0.73922	0.910819	0.519231	0.550279	0.59375	0.548611	0.950764	0.666105	0.979353	0.965122	0.870342	1	0.674748	0.755525	0.912135	0.713178	0.950893	0.607656	0.218557	0.866142	0.364583	0.461538	0.883333	0.680851	0.932642
671	0.742537	0.669492	0.750973	0.8	0.6	0.492997	0.545852	0.812207	0.58209	0.580247	0.740933	0.829876	0.701465	0.736939	0.574704	0.615194	0.680151	0.65481	0.678615	0.72027	0.586432	0.753571	0.691323	0.750672	0.735113	0.907895	0.514423	0.53352	0.589844	0.538194	0.95416	0.668634	0.979104	0.964803	0.863546	1	0.679511	0.755525	0.912135	0.705426	0.950893	0.590909	0.253608	0.866142	0.364583	0.424116	0.883333	0.680851	0.919689
672	0.794776	0.680791	0.785992	0.851852	0.62807	0.518207	0.572052	0.85446	0.567164	0.609053	0.797927	0.842324	0.685897	0.702108	0.56996	0.631709	0.648166	0.637025	0.662211	0.731081	0.570854	0.749286	0.715505	0.713038	0.722793	0.918129	0.543269	0.572626	0.648438	0.538194	0.857385	0.642496	0.962438	0.942268	0.821625	0.987	0.688494	0.755525	0.962827	0.751938	0.950893	0.27512	0.239175	0.929134	0.395833	0.426195	0.888889	0.744681	0.92228
673	0.794776	0.680791	0.785992	0.851852	0.62807	0.515406	0.572052	0.85446	0.567164	0.609053	0.797927	0.842324	0.684066	0.704858	0.571542	0.628406	0.647225	0.638642	0.664642	0.727027	0.566834	0.756429	0.71266	0.716398	0.718686	0.918129	0.538462	0.567039	0.648438	0.569444	0.85399	0.652614	0.963433	0.947842	0.838271	1	0.689144	0.755525	0.959447	0.751938	0.950893	0.284689	0.257732	0.929134	0.395833	0.349272	0.87037	0.744681	0.92228
674	0.794776	0.680791	0.77821	0.848148	0.624561	0.515406	0.567686	0.849765	0.563433	0.604938	0.797927	0.838174	0.687729	0.709441	0.575494	0.633361	0.65381	0.651576	0.678007	0.722297	0.578894	0.764286	0.713371	0.723118	0.722793	0.921053	0.533654	0.567039	0.660156	0.552083	0.857385	0.742833	0.96592	0.948877	0.852856	1	0.69001	0.755525	0.959447	0.775194	0.950893	0.277512	0.206186	0.929134	0.395833	0.365904	0.888889	0.744681	0.92228
675	0.791045	0.680791	0.77821	0.848148	0.624561	0.512605	0.567686	0.84507	0.559701	0.604938	0.792746	0.838174	0.685897	0.712191	0.578656	0.636664	0.654751	0.648343	0.67983	0.721622	0.576884	0.764286	0.71266	0.725806	0.726899	0.921053	0.528846	0.567039	0.648438	0.572917	0.855688	0.715852	0.966667	0.948877	0.847816	1	0.690876	0.755525	0.962827	0.775194	0.950893	0.248804	0.247423	0.929134	0.395833	0.370062	0.888889	0.744681	0.92228
676	0.791045	0.677966	0.77821	0.848148	0.624561	0.509804	0.563319	0.84507	0.559701	0.600823	0.792746	0.838174	0.690476	0.718607	0.577075	0.639967	0.657573	0.64996	0.671932	0.720946	0.582915	0.762143	0.709815	0.728495	0.718686	0.918129	0.528846	0.555866	0.621094	0.541667	0.852292	0.676223	0.966667	0.949435	0.848045	1	0.691092	0.755525	0.962827	0.767442	0.950893	0.258373	0.253608	0.929134	0.395833	0.301455	0.888889	0.744681	0.919689
677	0.787313	0.675141	0.774319	0.848148	0.621053	0.509804	0.563319	0.84507	0.559701	0.600823	0.792746	0.834025	0.694139	0.724106	0.583399	0.644922	0.662277	0.656427	0.670109	0.727027	0.577889	0.761429	0.711238	0.733871	0.710472	0.907895	0.528846	0.555866	0.652344	0.583333	0.857385	0.696459	0.9699	0.950231	0.849267	1	0.691309	0.755525	0.956068	0.744186	0.950893	0.311005	0.210309	0.929134	0.395833	0.365904	0.87037	0.723404	0.904145
678	0.783582	0.675141	0.770428	0.844444	0.621053	0.507003	0.558952	0.840376	0.55597	0.596708	0.787565	0.829876	0.696886	0.72044	0.58498	0.644922	0.667921	0.658044	0.671324	0.72973	0.577889	0.765	0.711238	0.739247	0.714579	0.902047	0.528846	0.572626	0.652344	0.576389	0.848896	0.682968	0.968657	0.951425	0.845144	1	0.693473	0.755525	0.952688	0.751938	0.950893	0.279904	0.253608	0.929134	0.395833	0.336798	0.87037	0.723404	0.901554
679	0.783582	0.675141	0.770428	0.844444	0.621053	0.504202	0.558952	0.840376	0.55597	0.596708	0.787565	0.829876	0.691392	0.72044	0.583399	0.641618	0.656632	0.658044	0.670717	0.731757	0.574874	0.768571	0.709104	0.741935	0.702259	0.902047	0.519231	0.544693	0.632812	0.583333	0.855688	0.692243	0.972388	0.953655	0.864615	1	0.692607	0.755525	0.949309	0.744186	0.950893	0.282297	0.206186	0.929134	0.395833	0.322245	0.87037	0.723404	0.896373
680	0.776119	0.669492	0.762646	0.840741	0.614035	0.501401	0.554585	0.830986	0.552239	0.592593	0.777202	0.825726	0.685897	0.72044	0.577866	0.638315	0.649106	0.64996	0.668894	0.733108	0.582915	0.753571	0.717639	0.744624	0.714579	0.902047	0.514423	0.544693	0.621094	0.538194	0.855688	0.711636	0.976617	0.959627	0.859728	1	0.689469	0.755525	0.94255	0.728682	0.950893	0.320574	0.25567	0.923885	0.395833	0.313929	0.892593	0.702128	0.917098
681	0.772388	0.666667	0.758755	0.837037	0.610526	0.498599	0.550218	0.826291	0.548507	0.584362	0.772021	0.821577	0.684066	0.718607	0.577075	0.635012	0.644403	0.64996	0.671932	0.734459	0.579899	0.762143	0.731152	0.751344	0.737166	0.944444	0.509615	0.550279	0.625	0.590278	0.852292	0.677909	0.977861	0.961618	0.853238	1	0.686438	0.755525	0.939171	0.72093	0.950893	0.296651	0.249485	0.923885	0.395833	0.282744	0.892593	0.680851	0.932642
682	0.768657	0.663842	0.758755	0.833333	0.607018	0.495798	0.545852	0.821596	0.544776	0.584362	0.766839	0.817427	0.68315	0.722273	0.576285	0.641618	0.646284	0.64996	0.671932	0.736486	0.586432	0.759286	0.711949	0.749328	0.728953	0.947368	0.504808	0.539106	0.625	0.513889	0.855688	0.672007	0.980846	0.959627	0.854307	1	0.685356	0.755525	0.935791	0.72093	0.950893	0.291866	0.253608	0.923885	0.395833	0.324324	0.883333	0.680851	0.930052
683	0.764925	0.661017	0.750973	0.82963	0.603509	0.492997	0.541485	0.816901	0.541045	0.584362	0.766839	0.817427	0.687729	0.724106	0.577866	0.636664	0.648166	0.65481	0.671324	0.737162	0.59598	0.759286	0.711949	0.749328	0.792608	0.94152	0.5	0.550279	0.65625	0.548611	0.842105	0.680438	0.983085	0.964166	0.839111	1	0.687087	0.755525	0.935791	0.713178	0.950893	0.267943	0.241237	0.923885	0.395833	0.251559	0.883333	0.680851	0.92228
684	0.764925	0.658192	0.747082	0.82963	0.603509	0.492997	0.541485	0.816901	0.541045	0.576132	0.766839	0.813278	0.694139	0.733272	0.585771	0.64327	0.651929	0.658044	0.674362	0.742568	0.837688	0.767857	0.731863	0.752688	0.714579	0.953216	0.5	0.550279	0.644531	0.506944	0.840407	0.663575	0.983582	0.960742	0.891035	1	0.686005	0.755525	0.935791	0.72093	0.950893	0.239234	0.239175	0.923885	0.395833	0.280665	0.892593	0.689362	0.940415
685	0.761194	0.658192	0.747082	0.82963	0.603509	0.492997	0.537118	0.816901	0.541045	0.576132	0.761658	0.813278	0.694139	0.736939	0.590514	0.649876	0.656632	0.662894	0.675577	0.747973	0.583417	0.760714	0.715505	0.75336	0.726899	0.97076	0.5	0.555866	0.644531	0.576389	0.840407	0.632378	0.985323	0.961857	0.852856	1	0.682	0.755525	0.935791	0.713178	0.950893	0.267943	0.247423	0.923885	0.395833	0.286902	0.883333	0.674468	0.948187
686	0.761194	0.658192	0.747082	0.825926	0.6	0.490196	0.537118	0.816901	0.541045	0.572016	0.761658	0.809129	0.695055	0.738772	0.592095	0.650702	0.658514	0.661277	0.6774	0.748649	0.579397	0.762143	0.715505	0.754032	0.714579	0.973684	0.495192	0.53352	0.613281	0.545139	0.843803	0.686341	0.98607	0.964166	0.843616	1	0.680593	0.755525	0.939171	0.713178	0.950893	0.27512	0.241237	0.923885	0.395833	0.37422	0.883333	0.674468	0.950777
687	0.761194	0.655367	0.743191	0.822222	0.6	0.487395	0.532751	0.812207	0.541045	0.572016	0.751295	0.804979	0.696886	0.738772	0.591304	0.651528	0.661336	0.662894	0.678007	0.748649	0.586432	0.77	0.713371	0.758065	0.698152	0.964912	0.495192	0.53352	0.589844	0.538194	0.843803	0.632378	0.982836	0.967113	0.837584	1	0.683516	0.755525	0.935791	0.713178	0.950893	0.251196	0.251546	0.923885	0.395833	0.224532	0.883333	0.674468	0.937824
688	0.757463	0.655367	0.743191	0.818519	0.596491	0.484594	0.532751	0.807512	0.541045	0.567901	0.756477	0.804979	0.693223	0.738772	0.629249	0.646573	0.656632	0.65966	0.676792	0.742568	0.582915	0.823571	0.721906	0.74664	0.714579	0.902047	0.490385	0.53352	0.582031	0.5	0.848896	0.572513	0.987562	0.96974	0.869349	0.920667	0.689036	0.755525	0.939171	0.72093	0.950893	0.287081	0.274227	0.947507	0.395833	0.288981	0.87037	0.680851	0.904145
689	0.753731	0.649718	0.735409	0.818519	0.592982	0.481793	0.528384	0.807512	0.537313	0.563786	0.751295	0.804979	0.695055	0.740605	0.591304	0.641618	0.654751	0.65966	0.676792	0.739189	0.58392	0.769286	0.722617	0.742608	0.731006	0.918129	0.485577	0.53352	0.558594	0.569444	0.842105	0.591062	0.993781	0.974518	0.860186	0.905333	0.684381	0.755525	0.935791	0.705426	0.950893	0.318182	0.25567	0.958005	0.395833	0.255717	0.888889	0.659574	0.932642
690	0.746269	0.646893	0.731518	0.814815	0.589474	0.478992	0.519651	0.802817	0.533582	0.559671	0.740933	0.79668	0.695055	0.736939	0.588933	0.641618	0.660395	0.661277	0.6774	0.739865	0.582915	0.767143	0.724751	0.739919	0.76386	0.932749	0.480769	0.544693	0.574219	0.618056	0.840407	0.598651	0.995025	0.97619	0.828879	0.909778	0.678428	0.755525	0.932412	0.682171	0.950893	0.327751	0.253608	0.947507	0.395833	0.247401	0.888889	0.659574	0.940415
691	0.746269	0.644068	0.727626	0.811111	0.585965	0.47619	0.515284	0.798122	0.529851	0.555556	0.740933	0.792531	0.696886	0.733272	0.592095	0.646573	0.664158	0.656427	0.680437	0.747973	0.589447	0.762143	0.723329	0.745296	0.76386	0.938596	0.485577	0.550279	0.589844	0.545139	0.845501	0.555649	0.998507	0.974598	0.863241	0.772	0.677887	0.755525	0.925653	0.674419	0.950893	0.351675	0.25567	0.950131	0.395833	0.205821	0.888889	0.638298	0.953368
692	0.742537	0.644068	0.723735	0.807407	0.585965	0.47619	0.515284	0.798122	0.529851	0.55144	0.735751	0.792531	0.698718	0.729606	0.593676	0.648225	0.66698	0.664511	0.684083	0.747297	0.580905	0.765	0.721195	0.745968	0.735113	0.932749	0.485577	0.578212	0.628906	0.517361	0.833616	0.58769	0.996517	0.973085	0.872175	0.765889	0.676264	0.755525	0.922274	0.666667	0.950893	0.373206	0.216495	0.942257	0.395833	0.226611	0.759259	0.638298	0.940415
693	0.738806	0.644068	0.719844	0.803704	0.578947	0.473389	0.515284	0.793427	0.529851	0.547325	0.735751	0.788382	0.698718	0.724106	0.589723	0.651528	0.669802	0.666128	0.682868	0.750676	0.579899	0.775	0.720484	0.744624	0.747433	0.878655	0.485577	0.583799	0.609375	0.583333	0.837012	0.565767	0.99801	0.979137	0.836515	0.805889	0.681784	0.755525	0.915515	0.674419	0.950893	0.397129	0.210309	0.92126	0.395833	0.033264	0.888889	0.638298	0.92228
694	0.735075	0.644068	0.719844	0.8	0.578947	0.473389	0.515284	0.793427	0.529851	0.547325	0.735751	0.784232	0.702381	0.725023	0.588933	0.651528	0.665099	0.662894	0.683475	0.751351	0.578894	0.765	0.716216	0.74328	0.75154	0.902047	0.490385	0.589385	0.601562	0.552083	0.842105	0.565767	0.99403	0.983039	0.836897	0.807333	0.678753	0.755525	0.918894	0.674419	0.950893	0.380383	0.22268	0.937008	0.395833	0.195426	0.888889	0.638298	0.935233
695	0.735075	0.644068	0.719844	0.8	0.578947	0.470588	0.515284	0.793427	0.529851	0.547325	0.735751	0.784232	0.701465	0.72594	0.587352	0.651528	0.659454	0.65966	0.682868	0.750676	0.574874	0.762143	0.715505	0.741935	0.780287	0.910819	0.490385	0.594972	0.589844	0.513889	0.835314	0.564081	0.993035	0.990842	0.831704	0.804	0.67464	0.755525	0.912135	0.666667	0.950893	0.368421	0.224742	0.934383	0.395833	0.185031	0.888889	0.638298	0.958549
696	0.791045	0.677966	0.785992	0.859259	0.62807	0.526611	0.563319	0.840376	0.552239	0.609053	0.792746	0.838174	0.691392	0.704858	0.580237	0.616846	0.658514	0.646726	0.682868	0.739865	0.575879	0.739286	0.71266	0.713038	0.743326	0.921053	0.533654	0.578212	0.644531	0.513889	0.845501	0.633221	0.965174	0.94402	0.91379	0.965667	0.683299	0.755525	0.956068	0.75969	0.950893	0.363636	0.212371	0.929134	0.395833	0.430353	0.888889	0.723404	0.940415
697	0.791045	0.677966	0.785992	0.855556	0.624561	0.52381	0.563319	0.835681	0.552239	0.609053	0.792746	0.838174	0.690476	0.702108	0.576285	0.613543	0.654751	0.643492	0.68226	0.735811	0.578894	0.755	0.709815	0.716398	0.741273	0.921053	0.533654	0.578212	0.625	0.534722	0.850594	0.694772	0.96592	0.94394	0.857132	0.999889	0.68016	0.755525	0.956068	0.75969	0.950893	0.279904	0.247423	0.929134	0.395833	0.386694	0.888889	0.723404	0.943005
698	0.791045	0.677966	0.782101	0.855556	0.624561	0.52381	0.563319	0.835681	0.548507	0.609053	0.787565	0.838174	0.687729	0.702108	0.573913	0.610239	0.649106	0.640259	0.681652	0.733108	0.582412	0.754286	0.72973	0.723118	0.741273	0.918129	0.533654	0.589385	0.632812	0.538194	0.848896	0.68887	0.965423	0.945373	0.832697	1	0.680701	0.755525	0.949309	0.75969	0.950893	0.282297	0.247423	0.929134	0.395833	0.426195	0.888889	0.723404	0.940415
699	0.787313	0.677966	0.782101	0.855556	0.621053	0.52381	0.558952	0.835681	0.548507	0.609053	0.787565	0.838174	0.685897	0.700275	0.577866	0.613543	0.647225	0.640259	0.676792	0.735135	0.583417	0.765	0.726885	0.725806	0.743326	0.915205	0.533654	0.567039	0.613281	0.559028	0.877759	0.709949	0.96592	0.940835	0.847434	1	0.679619	0.755525	0.952688	0.767442	0.950893	0.318182	0.208247	0.929134	0.395833	0.440748	0.888889	0.723404	0.943005
700	0.791045	0.675141	0.77821	0.851852	0.621053	0.52381	0.563319	0.835681	0.544776	0.604938	0.787565	0.838174	0.686813	0.705775	0.579447	0.618497	0.650988	0.641876	0.672539	0.733784	0.584422	0.76	0.726174	0.728495	0.737166	0.915205	0.528846	0.572626	0.625	0.621528	0.867572	0.662732	0.969154	0.94617	0.840638	1	0.677779	0.755525	0.952688	0.75969	0.950893	0.30622	0.245361	0.929134	0.395833	0.399168	0.87037	0.702128	0.937824
701	0.783582	0.672316	0.774319	0.848148	0.617544	0.521008	0.558952	0.830986	0.544776	0.600823	0.782383	0.834025	0.693223	0.709441	0.578656	0.616846	0.654751	0.645109	0.671932	0.732432	0.582915	0.763571	0.726174	0.733871	0.726899	0.909357	0.524038	0.583799	0.625	0.586806	0.855688	0.677909	0.970896	0.951107	0.847892	0.996556	0.679403	0.755525	0.949309	0.751938	0.950893	0.244019	0.245361	0.929134	0.395833	0.411642	0.888889	0.702128	0.930052
702	0.783582	0.672316	0.770428	0.848148	0.614035	0.518207	0.558952	0.830986	0.541045	0.596708	0.777202	0.834025	0.695055	0.713107	0.577075	0.616846	0.657573	0.648343	0.671324	0.732432	0.580402	0.761429	0.72404	0.739247	0.718686	0.904971	0.524038	0.567039	0.617188	0.559028	0.855688	0.672007	0.9699	0.951266	0.851329	0.984778	0.682	0.755525	0.94593	0.767442	0.950893	0.241627	0.237113	0.929134	0.395833	0.390852	0.87037	0.723404	0.92228
703	0.783582	0.669492	0.770428	0.848148	0.614035	0.518207	0.558952	0.830986	0.541045	0.596708	0.777202	0.834025	0.698718	0.71494	0.574704	0.613543	0.643462	0.646726	0.670717	0.731081	0.583417	0.757857	0.721195	0.741935	0.714579	0.906433	0.524038	0.544693	0.625	0.534722	0.859083	0.664418	0.970896	0.947285	0.84774	0.981778	0.684273	0.755525	0.94593	0.767442	0.950893	0.284689	0.243299	0.929134	0.395833	0.367983	0.87037	0.723404	0.919689
704	0.776119	0.669492	0.762646	0.833333	0.603509	0.509804	0.554585	0.830986	0.541045	0.596708	0.777202	0.834025	0.685897	0.702108	0.568379	0.606936	0.64158	0.637025	0.643985	0.703378	0.557789	0.724286	0.6899	0.744624	0.714579	0.878655	0.519231	0.488827	0.492188	0.565972	0.877759	0.648398	0.972637	0.951266	0.854307	0.931111	0.685572	0.755525	0.925653	0.682171	0.950893	0.291866	0.2	0.91601	0.40625	0.561331	0.888889	0.702128	0.880829
705	0.776119	0.669492	0.762646	0.837037	0.607018	0.509804	0.558952	0.830986	0.541045	0.596708	0.782383	0.834025	0.678571	0.694775	0.563636	0.606936	0.637817	0.633791	0.657351	0.67027	0.558794	0.722857	0.700569	0.751344	0.726899	0.893275	0.524038	0.522346	0.550781	0.579861	0.843803	0.688027	0.967413	0.952779	0.846976	0.953556	0.686113	0.755525	0.932412	0.705426	0.950893	0.303828	0.216495	0.950131	0.40625	0.453222	0.888889	0.702128	0.898964
706	0.783582	0.675141	0.774319	0.844444	0.617544	0.515406	0.563319	0.835681	0.548507	0.604938	0.792746	0.838174	0.669414	0.68561	0.556522	0.597027	0.626529	0.624091	0.671324	0.713514	0.569849	0.746429	0.71835	0.749328	0.735113	0.910819	0.533654	0.550279	0.582031	0.545139	0.816638	0.721754	0.963433	0.947125	0.833384	0.973111	0.68016	0.755525	0.94593	0.744186	0.950893	0.301435	0.247423	0.947507	0.40625	0.525988	0.87037	0.702128	0.92487
707	0.787313	0.672316	0.77821	0.848148	0.621053	0.518207	0.572052	0.840376	0.552239	0.609053	0.797927	0.838174	0.669414	0.688359	0.562055	0.603633	0.635936	0.629749	0.67497	0.737162	0.580905	0.756429	0.722617	0.749328	0.743326	0.919591	0.543269	0.555866	0.605469	0.597222	0.833616	0.717538	0.961692	0.940516	0.847282	0.988889	0.682	0.755525	0.976344	0.75969	0.950893	0.425837	0.249485	0.80315	0.40625	0.517672	0.87037	0.723404	0.932642
708	0.791045	0.680791	0.782101	0.851852	0.624561	0.521008	0.576419	0.84507	0.55597	0.613169	0.803109	0.842324	0.668498	0.694775	0.564427	0.606936	0.639699	0.630558	0.678007	0.737838	0.58593	0.754286	0.71835	0.752688	0.747433	0.923977	0.538462	0.567039	0.628906	0.565972	0.842105	0.715008	0.958458	0.941551	0.849191	0.989444	0.684706	0.755525	0.949309	0.775194	0.950893	0.287081	0.245361	0.971129	0.40625	0.550936	0.87037	0.723404	0.940415
709	0.794776	0.680791	0.785992	0.855556	0.62807	0.52381	0.576419	0.849765	0.548507	0.613169	0.80829	0.846473	0.680403	0.702108	0.56996	0.601982	0.643462	0.633791	0.681045	0.75473	0.584925	0.765	0.71835	0.75336	0.743326	0.926901	0.543269	0.572626	0.644531	0.555556	0.842105	0.721754	0.961194	0.938923	0.839798	0.972889	0.684814	0.755525	0.966206	0.775194	0.950893	0.342105	0.249485	0.96063	0.40625	0.488565	0.87037	0.723404	0.945596
710	0.791045	0.683616	0.782101	0.851852	0.62807	0.52381	0.572052	0.849765	0.552239	0.613169	0.80829	0.850622	0.688645	0.707608	0.574704	0.610239	0.646284	0.638642	0.668894	0.753378	0.583417	0.764286	0.716216	0.754032	0.741273	0.923977	0.567308	0.567039	0.621094	0.552083	0.840407	0.70489	0.960448	0.940436	0.87164	0.962444	0.684706	0.755525	0.962827	0.767442	0.950893	0.389952	0.25567	0.947507	0.40625	0.507277	0.87037	0.723404	0.940415
711	0.791045	0.680791	0.782101	0.851852	0.62807	0.507003	0.572052	0.849765	0.559701	0.613169	0.80829	0.850622	0.690476	0.71494	0.576285	0.613543	0.648166	0.641876	0.667072	0.750676	0.572864	0.759286	0.714083	0.758065	0.73922	0.918129	0.543269	0.561453	0.605469	0.545139	0.843803	0.683811	0.957463	0.93964	0.867288	0.951333	0.684273	0.755525	0.966206	0.775194	0.950893	0.404306	0.220619	0.942257	0.40625	0.515593	0.87037	0.723404	0.937824
712	0.794776	0.683616	0.782101	0.851852	0.62807	0.52381	0.576419	0.849765	0.563433	0.613169	0.80829	0.850622	0.696886	0.72044	0.580237	0.6218	0.65381	0.645109	0.674362	0.753378	0.59799	0.742143	0.714083	0.74664	0.731006	0.906433	0.543269	0.583799	0.648438	0.548611	0.848896	0.644182	0.958955	0.943701	0.868204	0.94	0.684381	0.755525	0.966206	0.751938	0.950893	0.399522	0.23299	0.942257	0.40625	0.580042	0.87037	0.744681	0.932642
713	0.794776	0.680791	0.782101	0.851852	0.62807	0.521008	0.576419	0.84507	0.563433	0.613169	0.80829	0.850622	0.690476	0.709441	0.577075	0.620149	0.65381	0.643492	0.675577	0.75473	0.594975	0.765	0.70697	0.742608	0.741273	0.906433	0.543269	0.594972	0.65625	0.607639	0.848896	0.644182	0.961194	0.937649	0.842242	0.959333	0.684165	0.755525	0.962827	0.751938	0.950893	0.41866	0.239175	0.942257	0.40625	0.49896	0.87037	0.744681	0.932642
714	0.794776	0.680791	0.782101	0.855556	0.62807	0.52381	0.576419	0.849765	0.563433	0.613169	0.80829	0.850622	0.687729	0.711274	0.577075	0.6218	0.657573	0.643492	0.676792	0.758784	0.60201	0.771429	0.705548	0.739919	0.743326	0.904971	0.548077	0.594972	0.652344	0.538194	0.848896	0.631535	0.961443	0.938764	0.860874	0.940222	0.685031	0.755525	0.962827	0.751938	0.950893	0.401914	0.220619	0.942257	0.40625	0.45738	0.888889	0.744681	0.935233
715	0.794776	0.680791	0.782101	0.851852	0.631579	0.521008	0.576419	0.849765	0.563433	0.609053	0.80829	0.846473	0.694139	0.716774	0.578656	0.648225	0.658514	0.645918	0.671932	0.754054	0.580905	0.737857	0.708393	0.745296	0.722793	0.906433	0.538462	0.567039	0.636719	0.524306	0.847199	0.547218	0.962438	0.942029	0.863241	0.912333	0.687412	0.755525	0.962827	0.751938	0.950893	0.299043	0.208247	0.942257	0.40625	0.413721	0.888889	0.744681	0.92487
716	0.794776	0.680791	0.782101	0.851852	0.631579	0.521008	0.572052	0.849765	0.563433	0.609053	0.803109	0.846473	0.696886	0.724106	0.581028	0.648225	0.662277	0.65481	0.673755	0.752027	0.571357	0.75	0.70697	0.745968	0.718686	0.902047	0.543269	0.561453	0.628906	0.552083	0.847199	0.547218	0.962935	0.942188	0.86011	0.906	0.686979	0.755525	0.962827	0.75969	0.950893	0.258373	0.239175	0.942257	0.40625	0.39501	0.87037	0.744681	0.919689
717	0.794776	0.680791	0.782101	0.851852	0.62807	0.521008	0.572052	0.849765	0.563433	0.609053	0.803109	0.842324	0.695055	0.718607	0.580237	0.649876	0.662277	0.648343	0.67497	0.725676	0.566332	0.736429	0.707681	0.744624	0.718686	0.902047	0.543269	0.583799	0.671875	0.552083	0.847199	0.546374	0.964179	0.943223	0.866448	0.896333	0.686763	0.755525	0.959447	0.767442	0.950893	0.277512	0.237113	0.942257	0.40625	0.492723	0.87037	0.744681	0.917098
718	0.794776	0.680791	0.785992	0.851852	0.62807	0.52381	0.572052	0.849765	0.567164	0.609053	0.803109	0.842324	0.691392	0.709441	0.579447	0.639967	0.659454	0.641876	0.672539	0.716892	0.562312	0.740714	0.720484	0.74328	0.722793	0.907895	0.543269	0.567039	0.652344	0.534722	0.847199	0.546374	0.964428	0.944896	0.860339	0.911111	0.686979	0.755525	0.962827	0.767442	0.950893	0.301435	0.224742	0.942257	0.40625	0.467775	0.888889	0.723404	0.92228
719	0.794776	0.680791	0.782101	0.851852	0.62807	0.518207	0.572052	0.849765	0.563433	0.609053	0.797927	0.842324	0.690476	0.707608	0.580237	0.597853	0.656632	0.638642	0.667072	0.724324	0.571859	0.727143	0.717639	0.741935	0.722793	0.913743	0.543269	0.567039	0.628906	0.559028	0.847199	0.546374	0.964428	0.943462	0.836515	0.971778	0.689036	0.755525	0.962827	0.75969	0.950893	0.272727	0.239175	0.942257	0.40625	0.422037	0.888889	0.723404	0.92228
720	0.727612	0.661017	0.719844	0.785185	0.578947	0.47619	0.532751	0.798122	0.552239	0.54321	0.740933	0.813278	0.696886	0.735105	0.588142	0.630058	0.61524	0.664511	0.682868	0.740541	0.584925	0.742143	0.708393	0.752688	0.75154	0.910819	0.5	0.567039	0.597656	0.517361	0.964346	0.639966	0.995025	0.990444	0.87752	0.634333	0.674532	0.755525	0.895238	0.674419	0.950893	0.593301	0.230928	0.892388	0.375	0.388773	0.888889	0.638298	0.927461
721	0.720149	0.658192	0.712062	0.777778	0.57193	0.473389	0.528384	0.798122	0.548507	0.539095	0.735751	0.809129	0.702381	0.738772	0.586561	0.625103	0.618062	0.670978	0.683475	0.74527	0.594975	0.760714	0.698435	0.762769	0.755647	0.925439	0.495192	0.567039	0.589844	0.513889	0.960951	0.60371	0.995025	0.992276	0.838424	0.608556	0.673341	0.755525	0.891859	0.666667	0.950893	0.598086	0.257732	0.892388	0.375	0.438669	0.87037	0.638298	0.943005
722	0.720149	0.658192	0.712062	0.777778	0.57193	0.473389	0.524017	0.798122	0.548507	0.539095	0.735751	0.809129	0.701465	0.736939	0.585771	0.626755	0.613358	0.670978	0.676792	0.739189	0.588442	0.762143	0.70128	0.739247	0.73922	0.919591	0.495192	0.578212	0.621094	0.534722	0.966044	0.589376	0.99602	0.991957	0.82361	0.604333	0.677454	0.755525	0.891859	0.658915	0.950893	0.555024	0.226804	0.866142	0.364583	0.365904	0.888889	0.638298	0.932642
723	0.720149	0.658192	0.708171	0.774074	0.568421	0.473389	0.524017	0.798122	0.548507	0.534979	0.73057	0.804979	0.699634	0.727773	0.58498	0.620149	0.606773	0.669361	0.675577	0.734459	0.58995	0.762143	0.704836	0.734543	0.73922	0.907895	0.490385	0.567039	0.59375	0.565972	0.96944	0.56914	0.997761	0.992117	0.865913	0.598444	0.676372	0.755525	0.891859	0.643411	0.950893	0.497608	0.257732	0.866142	0.364583	0.355509	0.87037	0.638298	0.92487
724	0.720149	0.658192	0.708171	0.774074	0.568421	0.473389	0.528384	0.798122	0.548507	0.534979	0.73057	0.804979	0.699634	0.727773	0.58419	0.620149	0.596425	0.664511	0.668894	0.728378	0.579899	0.742857	0.699147	0.727823	0.73922	0.907895	0.490385	0.550279	0.589844	0.541667	0.988115	0.58516	0.999254	0.994267	0.866371	0.611111	0.67832	0.755525	0.88848	0.627907	0.950893	0.509569	0.257732	0.866142	0.364583	0.370062	0.888889	0.638298	0.919689
725	0.720149	0.658192	0.708171	0.77037	0.568421	0.470588	0.528384	0.793427	0.548507	0.534979	0.73057	0.80083	0.695055	0.72594	0.581818	0.615194	0.591722	0.662894	0.668287	0.730405	0.583417	0.749286	0.701991	0.735215	0.731006	0.907895	0.485577	0.53352	0.589844	0.565972	0.955857	0.584317	1	0.992674	0.862553	0.617778	0.677887	0.755525	0.88848	0.627907	0.950893	0.495215	0.251546	0.866142	0.364583	0.318087	0.888889	0.638298	0.919689
726	0.716418	0.658192	0.708171	0.77037	0.564912	0.470588	0.524017	0.793427	0.548507	0.530864	0.73057	0.80083	0.687729	0.715857	0.576285	0.608588	0.587959	0.65481	0.668287	0.731757	0.587437	0.755	0.702703	0.737231	0.73922	0.910819	0.485577	0.561453	0.597656	0.527778	0.950764	0.580101	0.999005	0.99363	0.838271	0.609667	0.678645	0.755525	0.88848	0.651163	0.950893	0.5	0.257732	0.866142	0.364583	0.255717	0.888889	0.638298	0.917098
727	0.716418	0.658192	0.712062	0.77037	0.564912	0.467787	0.524017	0.793427	0.548507	0.530864	0.73057	0.80083	0.684066	0.72594	0.571542	0.610239	0.582314	0.653193	0.668287	0.730405	0.585427	0.762857	0.705548	0.737903	0.735113	0.910819	0.485577	0.561453	0.59375	0.548611	0.950764	0.580944	0.998756	0.999522	0.874236	0.604333	0.678861	0.755525	0.88848	0.651163	0.950893	0.497608	0.270103	0.866142	0.364583	0.120582	0.888889	0.638298	0.914508
728	0.712687	0.655367	0.70428	0.77037	0.561404	0.467787	0.519651	0.793427	0.548507	0.530864	0.725389	0.79668	0.696886	0.740605	0.573913	0.613543	0.580433	0.65481	0.668287	0.728378	0.592965	0.766429	0.708393	0.740591	0.735113	0.910819	0.524038	0.527933	0.5625	0.527778	0.952462	0.577572	0.998756	0.996018	0.845984	0.611	0.672692	0.755525	0.891859	0.635659	0.950893	0.476077	0.245361	0.913386	0.364583	0.0956341	0.87037	0.638298	0.906736
729	0.716418	0.658192	0.708171	0.77037	0.568421	0.467787	0.524017	0.798122	0.552239	0.534979	0.73057	0.80083	0.705128	0.733272	0.566008	0.572254	0.57667	0.628941	0.668287	0.734459	0.596985	0.753571	0.451636	0.762097	0.731006	0.907895	0.490385	0.544693	0.582031	0.618056	0.938879	0.509275	0.99005	0.98702	0.625993	0.512333	0.671393	0.755525	0.895238	0.627907	0.950893	0.37799	0.251546	0.913386	0.364583	0.114345	0.883333	0.638298	0.906736
730	0.720149	0.661017	0.715953	0.777778	0.589474	0.473389	0.528384	0.807512	0.559701	0.54321	0.740933	0.804979	0.708791	0.738772	0.573913	0.573906	1	0.637025	0.668287	0.739189	0.574874	0.770714	0.462304	0.756048	0.722793	0.907895	0.495192	0.527933	0.566406	0.590278	0.933786	0.507589	0.990299	0.983994	0.680895	0.471333	0.667388	0.755525	0.895238	0.651163	0.950893	0.452153	0.268041	0.913386	0.364583	0.168399	0.892593	0.638298	0.909326
731	0.727612	0.666667	0.727626	0.788889	0.614035	0.478992	0.537118	0.816901	0.567164	0.54321	0.756477	0.813278	0.716117	0.722273	0.554941	0.572254	1	0.637025	0.668287	0.743243	0.571357	0.768571	0.447368	0.754032	0.73922	0.904971	0.509615	0.527933	0.558594	0.680556	0.938879	0.484823	0.985323	0.975553	0.683644	0.486667	0.664682	0.755525	0.895238	0.658915	0.950893	0.416268	0.259794	0.913386	0.364583	0.18711	0.875926	0.638298	0.911917
732	0.735075	0.669492	0.7393	0.8	0.635088	0.487395	0.541485	0.826291	0.574627	0.563786	0.772021	0.821577	0.690476	0.683776	0.529644	0.533443	1	0.601455	0.668287	0.727703	0.571859	0.754286	0.427454	0.750672	0.743326	0.910819	0.519231	0.527933	0.546875	0.677083	0.943973	0.46543	0.983085	0.968944	0.672114	0.799111	0.674207	0.755525	0.898618	0.666667	0.950893	0.466507	0.253608	0.913386	0.364583	0.29106	0.883333	0.659574	0.919689
733	0.742537	0.675141	0.747082	0.811111	0.638596	0.495798	0.550218	0.835681	0.58209	0.576132	0.782383	0.829876	0.685897	0.707608	0.536759	0.545004	1	0.606306	0.668287	0.717568	0.584925	0.754286	0.413229	0.744624	0.743326	0.913743	0.528846	0.53352	0.535156	0.743056	1	0.521922	0.979104	0.967033	0.683797	0.923889	0.672259	0.755525	0.901997	0.674419	0.950893	0.449761	0.253608	0.913386	0.364583	0.234927	0.883333	0.659574	0.92228
734	0.746269	0.680791	0.754864	0.818519	0.624561	0.495798	0.558952	0.835681	0.589552	0.576132	0.787565	0.834025	0.677656	0.707608	0.552569	0.58877	0.608655	0.633791	0.668287	0.732432	0.578894	0.762143	0.66074	0.761425	0.75154	0.919591	0.524038	0.539106	0.542969	0.638889	0.949066	0.61973	0.979104	0.967511	0.863012	0.965222	0.670419	0.755525	0.901997	0.674419	0.950893	0.4689	0.257732	0.913386	0.364583	0.230769	0.883333	0.659574	0.906736
735	0.75	0.680791	0.754864	0.814815	0.617544	0.495798	0.558952	0.835681	0.589552	0.576132	0.787565	0.834025	0.675824	0.703025	0.550198	0.564822	0.699906	0.630558	0.668287	0.735135	0.576884	0.758571	0.697013	0.74328	0.75154	0.923977	0.524038	0.539106	0.550781	0.642361	0.947368	0.586847	0.978607	0.970298	0.861484	0.942111	0.672475	0.755525	0.895238	0.666667	0.950893	0.454545	0.241237	0.913386	0.364583	0.29106	0.883333	0.659574	0.932642
736	0.742537	0.677966	0.750973	0.811111	0.603509	0.492997	0.550218	0.830986	0.58209	0.584362	0.777202	0.829876	0.675824	0.707608	0.551779	0.591247	0.634055	0.633791	0.673755	0.735135	0.590955	0.753571	0.722617	0.734543	0.73922	0.919591	0.519231	0.53352	0.566406	0.576389	0.947368	0.634907	0.9801	0.971492	0.869731	0.970444	0.672475	0.755525	0.901997	0.674419	0.950893	0.492823	0.214433	0.910761	0.364583	0.234927	0.883333	0.659574	0.927461
737	0.738806	0.675141	0.743191	0.8	0.592982	0.490196	0.541485	0.826291	0.574627	0.576132	0.766839	0.825726	0.690476	0.722273	0.556522	0.60033	0.650047	0.641876	0.678007	0.737162	0.590452	0.752857	0.700569	0.731183	0.735113	0.913743	0.509615	0.527933	0.558594	0.576389	0.945671	0.607926	0.982836	0.978739	0.86515	0.938	0.673666	0.755525	0.898618	0.666667	0.965774	0.557416	0.216495	0.910761	0.364583	0.230769	0.883333	0.659574	0.917098
738	0.731343	0.672316	0.7393	0.8	0.589474	0.484594	0.537118	0.821596	0.570896	0.572016	0.761658	0.821577	0.702381	0.736939	0.565217	0.610239	0.663217	0.64996	0.68226	0.739189	0.59196	0.757857	0.709104	0.733871	0.726899	0.907895	0.504808	0.544693	0.582031	0.5625	0.945671	0.597808	0.981095	0.977465	0.862477	0.927222	0.674207	0.755525	0.905377	0.658915	0.950893	0.511962	0.263918	0.910761	0.364583	0.305613	0.883333	0.659574	0.909326
739	0.731343	0.669492	0.735409	0.796296	0.582456	0.481793	0.537118	0.816901	0.570896	0.567901	0.756477	0.821577	0.708791	0.740605	0.529644	0.618497	0.682973	0.667745	0.68469	0.742568	0.570854	0.752143	0.700569	0.740591	0.731006	0.904971	0.5	0.53352	0.589844	0.586806	0.933786	0.559865	0.985075	0.984313	0.837508	0.903889	0.673774	0.755525	0.908756	0.658915	0.950893	0.535885	0.272165	0.913386	0.364583	0.347193	0.883333	0.659574	0.914508
740	0.727612	0.669492	0.731518	0.792593	0.578947	0.478992	0.532751	0.816901	0.570896	0.567901	0.751295	0.817427	0.717949	0.747938	0.578656	0.618497	0.688617	0.670978	0.685298	0.739865	0.579899	0.742143	0.697724	0.731855	0.73922	0.904971	0.5	0.53352	0.574219	0.576389	0.935484	0.559865	0.987065	0.984233	0.836744	0.904444	0.6728	0.755525	0.905377	0.658915	0.950893	0.569378	0.220619	0.913386	0.364583	0.419958	0.892593	0.659574	0.919689
741	0.723881	0.666667	0.731518	0.788889	0.575439	0.47619	0.528384	0.812207	0.567164	0.563786	0.746114	0.817427	0.716117	0.746104	0.581028	0.620149	0.693321	0.672595	0.685298	0.738514	0.582412	0.740714	0.698435	0.731855	0.743326	0.913743	0.5	0.539106	0.558594	0.555556	0.932088	0.561551	0.986816	0.985029	0.836133	0.901333	0.673017	0.755525	0.895238	0.666667	0.950893	0.526316	0.282474	0.910761	0.364583	0.390852	0.892593	0.659574	0.927461
742	0.723881	0.666667	0.731518	0.788889	0.575439	0.47619	0.528384	0.812207	0.567164	0.563786	0.746114	0.813278	0.714286	0.744271	0.581028	0.618497	0.689558	0.670978	0.68712	0.738514	0.580402	0.743571	0.700569	0.731183	0.737166	0.913743	0.5	0.561453	0.570312	0.538194	0.942275	0.560708	0.986816	0.9828	0.833842	0.854889	0.673558	0.755525	0.898618	0.674419	0.950893	0.614833	0.243299	0.913386	0.364583	0.405405	0.892593	0.659574	0.930052
743	0.723881	0.666667	0.731518	0.792593	0.575439	0.47619	0.528384	0.812207	0.567164	0.563786	0.746114	0.813278	0.716117	0.749771	0.577075	0.616846	0.688617	0.666936	0.688335	0.736486	0.578894	0.743571	0.701991	0.731855	0.743326	0.913743	0.5	0.555866	0.554688	0.541667	0.937182	0.560708	0.986816	0.98065	0.845602	0.756111	0.671934	0.755525	0.898618	0.666667	0.950893	0.58134	0.268041	0.910761	0.364583	0.39501	0.892593	0.659574	0.932642
744	0.738806	0.666667	0.723735	0.785185	0.589474	0.487395	0.537118	0.816901	0.552239	0.555556	0.751295	0.825726	0.675824	0.709441	0.570751	0.598679	0.599247	0.641876	0.670109	0.721622	0.60201	0.74	0.683499	0.747984	0.735113	0.904971	0.495192	0.527933	0.574219	0.572917	0.979626	0.750422	0.981343	0.985109	0.870648	1	0.683083	0.755525	0.8851	0.705426	0.950893	0.504785	0.272165	0.913386	0.385417	0.390852	0.888889	0.680851	0.841969
745	0.735075	0.663842	0.719844	0.781481	0.585965	0.484594	0.537118	0.816901	0.552239	0.555556	0.751295	0.825726	0.673077	0.711274	0.572332	0.598679	0.597366	0.641876	0.668287	0.725	0.586432	0.751429	0.687767	#VALUE!	0.73922	0.907895	0.490385	0.527933	0.570312	0.253472	0.972835	0.765599	0.982836	0.986065	0.846442	1	0.682866	0.755525	0.881721	0.689922	0.950893	0.588517	0.22268	0.913386	0.385417	0.357588	0.888889	0.680851	0.919689
746	0.731343	0.661017	0.708171	0.777778	0.585965	0.481793	0.537118	0.812207	0.552239	0.55144	0.746114	0.825726	0.68315	0.71494	0.574704	0.60033	0.601129	0.648343	0.670109	0.728378	0.58191	0.759286	0.694879	0.758737	0.75154	0.921053	0.490385	0.550279	0.59375	0.552083	0.98472	0.730185	0.98607	0.984233	0.841936	1	0.679403	0.755525	0.878341	0.697674	0.950893	0.562201	0.263918	0.913386	0.385417	0.338877	0.888889	0.659574	0.935233
747	0.723881	0.658192	0.708171	0.774074	0.582456	0.478992	0.528384	0.802817	0.544776	0.547325	0.735751	0.825726	0.684066	0.72044	0.574704	0.603633	0.596425	0.64996	0.668287	0.727027	0.580905	0.762143	0.694879	0.751344	0.75154	0.921053	0.480769	0.539106	0.585938	0.572917	0.971138	0.667791	0.988308	0.994267	0.844533	1	0.679835	0.755525	0.874962	0.697674	0.950893	0.590909	0.224742	0.913386	0.385417	0.367983	0.888889	0.659574	0.932642
748	0.720149	0.658192	0.700389	0.77037	0.575439	0.196078	0.524017	0.802817	0.541045	0.54321	0.735751	0.821577	0.684066	0.72044	0.577075	0.606936	0.601129	0.653193	0.668894	0.727027	0.582412	0.761429	0.70128	0.747984	0.7577	0.921053	0.475962	0.53352	0.585938	0.506944	0.989813	0.665261	0.968159	0.996496	0.859346	0.930222	0.680593	0.755525	0.878341	0.689922	0.950893	0.504785	0.274227	0.92126	0.385417	0.390852	0.888889	0.659574	0.927461
749	0.716418	0.655367	0.579767	0.762963	0.57193	0.470588	0.519651	0.793427	0.541045	0.534979	0.725389	0.817427	0.685897	0.72594	0.578656	0.610239	0.603951	0.65481	0.672539	0.72973	0.582915	0.753571	0.701991	0.745296	0.731006	0.910819	0.471154	0.53352	0.59375	0.545139	0.989813	0.65683	0.991791	0.995222	0.882789	0.877222	0.674748	0.755525	0.874962	0.689922	0.950893	0.504785	0.272165	0.92126	0.385417	0.45738	0.888889	0.659574	0.919689
750	0.712687	0.652542	0.696498	0.762963	0.568421	0.467787	0.515284	0.793427	0.541045	0.534979	0.725389	0.813278	0.687729	0.72594	0.580237	0.608588	0.604892	0.656427	0.676185	0.731757	0.58593	0.763571	0.70128	0.747984	0.731006	0.906433	0.471154	0.539106	0.609375	0.510417	0.988115	0.659359	0.994527	0.998726	0.844456	0.901556	0.685356	0.755525	0.874962	0.697674	0.950893	0.502392	0.272165	0.918635	0.385417	0.361746	0.888889	0.659574	0.914508
751	0.708955	0.649718	0.696498	0.759259	0.564912	0.467787	0.515284	0.793427	0.425373	0.0246914	0.725389	0.813278	0.690476	0.72594	0.582609	0.611891	0.606773	0.658044	0.679222	0.733784	0.588442	0.766429	0.704125	0.751344	0.731006	0.904971	0.471154	0.544693	0.621094	0.510417	0.988115	0.6543	0.994776	1	0.844533	0.890889	0.68568	0.755525	0.874962	0.697674	0.950893	0.509569	0.251546	0.918635	0.385417	0.386694	0.888889	0.659574	0.911917
752	0.708955	0.646893	0.696498	0.759259	0.564912	0.464986	0.515284	0.793427	0.541045	0.534979	0.720207	0.809129	0.696886	0.727773	0.576285	0.623452	0.603951	0.663703	0.672539	0.740541	0.582412	0.757143	0.704125	0.748656	0.73922	0.902047	0.480769	0.567039	0.601562	0.510417	0.967742	0.655143	0.992786	0.993948	0.867593	0.860667	0.680268	0.755525	0.8851	0.705426	0.950893	0.574163	0.235052	0.92126	0.385417	0.486486	0.888889	0.659574	0.919689
753	0.712687	0.646893	0.696498	0.759259	0.564912	0.464986	0.515284	0.793427	0.541045	0.534979	0.725389	0.809129	0.696886	0.731439	0.577075	0.6218	0.603951	0.664511	0.664034	0.739865	0.577889	0.754286	0.704125	0.74664	0.735113	0.906433	0.480769	0.555866	0.617188	0.496528	0.967742	0.655143	0.992289	0.990365	0.873091	0.860111	0.677887	0.755525	0.88848	0.705426	0.950893	0.54067	0.282474	0.92126	0.385417	0.569647	0.87037	0.638298	0.92228
754	0.712687	0.652542	0.70428	0.762963	0.564912	0.470588	0.524017	0.793427	0.541045	0.539095	0.73057	0.813278	0.696886	0.736939	0.58498	0.620149	0.60301	0.661277	0.657351	0.739189	0.577889	0.752143	0.697013	0.74328	0.747433	0.913743	0.480769	0.539106	0.605469	0.541667	0.966044	0.662732	0.990299	0.986702	0.828345	0.859556	0.673882	0.755525	0.895238	0.72093	0.950893	0.555024	0.274227	0.918635	0.385417	0.619543	0.888889	0.638298	0.930052
755	0.720149	0.655367	0.708171	0.77037	0.575439	0.473389	0.532751	0.798122	0.548507	0.547325	0.735751	0.817427	0.691392	0.735105	0.583399	0.620149	0.611477	0.662894	0.671932	0.741216	0.562312	0.753571	0.714083	0.75	0.75154	0.921053	0.490385	0.561453	0.636719	0.583333	0.967742	0.660202	0.989801	0.980968	0.84102	0.896	0.67464	0.755525	0.901997	0.72093	0.950893	0.538278	0.282474	0.92126	0.385417	0.509356	0.87037	0.638298	0.932642
756	0.723881	0.658192	0.712062	0.777778	0.578947	0.478992	0.537118	0.807512	0.552239	0.55144	0.746114	0.821577	0.684982	0.731439	0.581818	0.615194	0.611477	0.658044	0.688943	0.744595	0.59397	0.757143	0.70697	0.74664	0.772074	0.932749	0.5	0.567039	0.605469	0.552083	0.967742	0.615514	0.893781	0.983835	0.84018	0.858	0.67464	0.755525	0.915515	0.736434	0.950893	0.569378	0.185567	0.92126	0.385417	0.494802	0.87037	0.638298	0.950777
757	0.727612	0.646893	0.712062	0.777778	0.575439	0.47619	0.532751	0.807512	0.548507	0.547325	0.751295	0.821577	0.684066	0.731439	0.581818	0.616846	0.611477	0.64996	0.690765	0.74527	0.594975	0.762143	0.707681	0.747312	0.772074	0.932749	0.5	0.561453	0.613281	0.545139	0.96944	0.609612	0.887065	0.980729	0.838806	0.860556	0.674748	0.755525	0.915515	0.736434	0.950893	0.576555	0.230928	0.92126	0.385417	0.494802	0.87037	0.659574	0.953368
758	0.731343	0.663842	0.719844	0.781481	0.582456	0.481793	0.541485	0.812207	0.55597	0.555556	0.751295	0.825726	0.691392	0.736939	0.58419	0.618497	0.61524	0.666128	0.695626	0.740541	0.588442	0.766429	0.70697	0.750672	0.76386	0.932749	0.504808	0.555866	0.589844	0.559028	0.972835	0.586003	0.987562	0.975872	0.856597	0.876778	0.673882	0.755525	0.922274	0.736434	0.950893	0.576555	0.230928	0.918635	0.385417	0.559252	0.87037	0.638298	0.950777
759	0.731343	0.666667	0.723735	0.785185	0.585965	0.481793	0.541485	0.816901	0.559701	0.555556	0.751295	0.825726	0.699634	0.742438	0.585771	0.623452	0.616181	0.669361	0.692588	0.733784	0.577889	0.747857	0.701991	0.752016	0.747433	0.923977	0.504808	0.544693	0.59375	0.524306	0.972835	0.556492	0.986567	0.981844	0.875305	0.921222	0.673774	0.755525	0.932412	0.744186	0.950893	0.535885	0.270103	0.656168	0.385417	0.607069	0.87037	0.638298	0.943005
760	0.731343	0.663842	0.719844	0.785185	0.582456	0.478992	0.537118	0.812207	0.55597	0.55144	0.751295	0.817427	0.705128	0.736939	0.573123	0.625103	0.609595	0.666128	0.660389	0.721622	0.584925	0.683571	0.682788	0.72379	0.747433	0.897661	0.504808	0.572626	0.597656	0.541667	0.983022	0.640809	0.990796	0.985826	0.845754	0.627111	0.680485	0.755525	0.912135	0.713178	0.950893	0.562201	0.268041	0.656168	0.385417	0.64657	0.888889	0.659574	0.92228
761	0.731343	0.663842	0.723735	0.785185	0.582456	0.478992	0.537118	0.812207	0.55597	0.555556	0.751295	0.813278	0.701465	0.733272	0.572332	0.623452	0.608655	0.664511	0.664642	0.710811	0.582412	0.727857	0.719061	0.725806	0.759754	0.907895	0.504808	0.572626	0.589844	0.534722	0.983022	0.640809	0.990547	0.98495	0.845525	0.641667	0.679835	0.755525	0.912135	0.713178	0.950893	0.562201	0.276289	0.656168	0.385417	0.5842	0.888889	0.659574	0.932642
762	0.731343	0.663842	0.723735	0.785185	0.582456	0.478992	0.537118	0.812207	0.55597	0.555556	0.751295	0.813278	0.696886	0.729606	0.570751	0.6218	0.605833	0.662894	0.666464	0.711486	0.583417	0.73	0.685633	0.729839	0.76386	0.913743	0.504808	0.572626	0.589844	0.545139	0.979626	0.637437	0.991294	0.983516	0.847892	0.633556	0.677671	0.755525	0.912135	0.705426	0.950893	0.528708	0.274227	0.656168	0.385417	0.613306	0.888889	0.659574	0.937824
763	0.731343	0.663842	0.723735	0.788889	0.582456	0.478992	0.537118	0.812207	0.55597	0.555556	0.751295	0.813278	0.699634	0.733272	0.570751	0.616846	0.600188	0.65966	0.668287	0.710811	0.587437	0.733571	0.69559	0.735887	0.76386	0.932749	0.504808	0.550279	0.578125	0.572917	0.976231	0.650084	0.991294	0.98917	0.824603	0.643889	0.678212	0.755525	0.908756	0.697674	0.950893	0.598086	0.23299	0.661417	0.385417	0.455301	0.888889	0.659574	0.943005
764	0.731343	0.663842	0.723735	0.792593	0.582456	0.478992	0.537118	0.812207	0.55597	0.55144	0.746114	0.813278	0.694139	0.729606	0.56996	0.616846	0.592662	0.666128	0.670109	0.716216	0.593467	0.732857	0.694879	0.739247	0.726899	0.923977	0.5	0.550279	0.597656	0.541667	0.96944	0.659359	0.993532	0.988852	0.845907	0.645889	0.682325	0.755525	0.912135	0.697674	0.950893	0.600478	0.22268	0.661417	0.385417	0.405405	0.888889	0.659574	0.950777
765	0.731343	0.663842	0.723735	0.792593	0.582456	0.478992	0.537118	0.802817	0.552239	0.547325	0.746114	0.813278	0.697802	0.733272	0.571542	0.616846	0.595484	0.65966	0.671324	0.732432	0.588945	0.731429	0.708393	0.741263	0.722793	0.899123	0.5	0.550279	0.613281	0.565972	0.959253	0.67032	0.993284	0.987817	0.843693	0.654	0.683624	0.755525	0.905377	0.697674	0.950893	0.574163	0.276289	0.664042	0.385417	0.461538	0.888889	0.659574	0.904145
766	0.731343	0.661017	0.719844	0.788889	0.578947	0.478992	0.537118	0.802817	0.552239	0.547325	0.746114	0.813278	0.696886	0.733272	0.575494	0.620149	0.601129	0.656427	0.675577	0.741216	0.601508	0.745	0.763158	0.75	0.726899	0.897661	0.5	0.561453	0.609375	0.5	0.966044	0.639966	0.992786	0.989011	0.86599	0.629111	0.683299	0.755525	0.898618	0.689922	0.950893	0.504785	0.268041	0.664042	0.385417	0.409563	0.888889	0.659574	0.906736
767	0.727612	0.663842	0.719844	0.788889	0.578947	0.478992	0.537118	0.802817	0.552239	0.547325	0.746114	0.813278	0.696886	0.733272	0.574704	0.6218	0.60207	0.658044	0.676185	0.741892	0.603518	0.743571	0.688478	0.75	0.726899	0.897661	0.5	0.558659	0.605469	0.503472	0.966044	0.639966	0.991542	0.988772	0.879734	0.628556	0.682325	0	0.898618	0.689922	0.950893	0.550239	0.274227	0.664042	0.385417	0.444906	0.888889	0.659574	0.906736
768	0.813433	0.646893	0.891051	0.833333	0.894737	0.94958	0.930131	0.798122	1	0.864198	0.689119	0.717842	0.739011	0.747021	0.624506	0.629232	0.733772	0.665319	0.678007	0.744595	0.425628	0.731429	0.733286	0.738575	0.741273	0.896199	0.668269	0.592179	0.621094	0.295139	0.772496	0.395447	0.792537	0.943542	0.661881	0.217667	0.676913	0.719268	0.327498	0.689922	0.129464	0.555024	0.315464	0.91601	0.40625	0.438669	0.87037	0.574468	0.865285
769	0.813433	0.646893	0.891051	0.833333	0.891228	0.94958	0.930131	0.793427	0.985075	0.864198	0.683938	0.713693	0.733516	0.741522	0.622134	0.630884	0.722484	0.660469	0.679222	0.738514	0.434673	0.719286	0.727596	0.735887	0.737166	0.894737	0.692308	0.581006	0.65625	0.385417	0.658744	0.457841	0.791791	0.948798	0.666539	0	0.678753	0.719268	0.337636	0.705426	0.129464	0.550239	0.334021	0.918635	0.40625	0.528067	0.87037	0.574468	0.865285
770	0.809701	0.644068	0.891051	0.82963	0.887719	0.946779	0.925764	0.793427	0.981343	0.860082	0.683938	0.713693	0.727106	0.736022	0.619763	0.630884	0.703669	0.655618	0.704131	0.758784	0.439196	0.74	0.751067	0.760081	0.741273	0.890351	0.706731	0.581006	0.660156	0.309028	0.658744	0.456155	0.79005	0.94824	0.630651	0	0.677454	0.719268	0.354533	0.713178	0.133929	0.547847	0.301031	0.910761	0.40625	0.419958	0.87037	0.574468	0.860104
771	0.809701	0.644068	0.891051	0.82963	0.887719	0.946779	0.925764	0.793427	0.977612	0.860082	0.678756	0.713693	0.722527	0.732356	0.61502	0.620974	0.70555	0.650768	0.696841	0.752027	0.434673	0.736429	0.737553	0.760081	0.74538	0.888889	0.673077	0.608939	0.652344	0.350694	0.663837	0.46796	0.79005	0.946329	0.630192	0	0.680377	0.719268	0.357913	0.705426	0.135417	0.57177	0.342268	0.913386	0.40625	0.449064	0.87037	0.574468	0.854922
772	0.809701	0.641243	0.88716	0.82963	0.884211	0.946779	0.925764	0.793427	0.973881	0.860082	0.678756	0.713693	0.717949	0.726856	0.61502	0.619323	0.694262	0.649151	0.691373	0.75473	0.435176	0.739286	0.738265	0.760081	0.74538	0.885965	0.653846	0.614525	0.671875	0.298611	0.848896	0.448567	0.788557	0.94394	0.645006	0	0.679403	0.719268	0.357913	0.705426	0.136905	0.543062	0.313402	0.900262	0.40625	0.465696	0.87037	0.574468	0.860104
773	0.809701	0.641243	0.891051	0.833333	0.880702	0.94958	0.925764	0.793427	0.981343	0.860082	0.678756	0.713693	0.71978	0.732356	0.617391	0.622626	0.699906	0.654002	0.68955	0.763514	0.432161	0.725	0.741821	0.745968	0.74538	0.887427	0.625	0.603352	0.65625	0.368056	0.650255	0.526981	0.789055	0.948081	0.637599	0.000222222	0.680485	0.719268	0.351154	0.713178	0.135417	0.5311	0.303093	0.908136	0.40625	0.455301	0.87037	0.574468	0.865285
774	0.809701	0.641243	0.891051	0.833333	0.877193	0.94958	0.925764	0.788732	0.977612	0.855967	0.678756	0.713693	0.722527	0.729606	0.618972	0.625929	0.695202	0.655618	0.690765	0.766892	0.441709	0.727857	0.746088	0.762097	0.753593	0.913743	0.620192	0.614525	0.683594	0.40625	0.770798	0.480607	0.789552	0.947922	0.602703	0.000222222	0.686546	0.719268	0.347775	0.713178	0.136905	0.502392	0.309278	0.895013	0.40625	0.419958	0.87037	0.574468	0.875648
775	0.809701	0.641243	0.88716	0.833333	0.877193	0.94958	0.925764	0.788732	0.981343	0.855967	0.673575	0.709544	0.723443	0.72594	0.619763	0.624277	0.703669	0.658852	0.691981	0.75473	0.456784	0.730714	0.744666	0.761425	0.749487	0.912281	0.615385	0.636872	0.6875	0.28125	0.782683	0.470489	0.791791	0.949992	0.601176	0.000333333	0.680268	0.719268	0.344395	0.713178	0.135417	0.555024	0.321649	0.895013	0.40625	0.326403	0.87037	0.574468	0.875648
776	0.809701	0.638418	0.891051	0.837037	0.873684	0.952381	0.925764	0.788732	0.973881	0.860082	0.678756	0.713693	0.720696	0.726856	0.616601	0.617671	0.686736	0.652385	0.685905	0.748649	0.415075	0.726429	0.70697	0.672715	0.749487	0.909357	0.543269	0.620112	0.707031	0.274306	0.764007	0.429174	0.781095	0.946807	0.659743	0.000444444	0.706678	0.719268	0.371431	0.751938	0.142857	0.392344	0	0.871391	0.401042	0.471933	0.785185	0.574468	0.88601
777	0.820896	0.641243	0.910506	0.948148	0.877193	0.969188	0.938865	0.793427	0.973881	0.860082	0.683938	0.717842	0.662088	0.641613	0.577075	0.574732	0.620884	0.608731	0.609964	0.597297	0.364824	0.477143	0.538407	0.566532	0.657084	0.828947	0.572115	0.50838	0.453125	0.444444	0.0679117	0.137437	0.786318	0.937251	0.249618	0	0.00032471	0.719268	0.347775	0.697674	0.135417	0.12201	0.0412371	0.343832	0.104167	0.0602911	0.0740741	0.106383	0.792746
778	0.820896	0.635593	0.910506	0.92963	0.873684	0.960784	0.943231	0.793427	0.914179	0.868313	0.683938	0.717842	0.684066	0.68011	0.580237	0.581338	0.664158	0.620049	0.54192	0.527027	0.285427	0.373571	0.454481	0.483199	0.655031	0.849415	0.557692	0.469274	0.460938	0.274306	0.0339559	0.13575	0.789801	0.945214	0.632941	0	0.382942	0.719268	0.313981	0.627907	0.126488	1	0.459794	0.496063	0.0520833	0.49896	0.444444	0.106383	0.792746
779	0.809701	0.629944	0.902724	0.877778	0.866667	0.952381	0.934498	0.793427	0.906716	1	0.683938	0.717842	0.709707	0.711274	0.604743	0.609414	0.69238	0.641067	0.654313	0.694595	0.436181	0.680714	0.697724	0.727151	0.74538	0.902047	0.586538	0.575419	0.601562	0.319444	0.689304	0.512648	0.778856	0.950072	0.636378	0.000288889	0.72378	0.719268	0.354533	0.682171	0.13244	0.662679	0.358763	0.813648	0.364583	0.295218	0.87037	0.638298	0.818653
780	0.809701	0.632768	0.898833	0.87037	0.866667	0.955182	0.934498	0.793427	0.962687	0.868313	0.683938	0.717842	0.702381	0.703025	0.6	0.599505	0.681091	0.6346	0.673147	0.734459	0.443216	0.71	0.716216	0.750672	0.761807	0.912281	0.591346	0.603352	0.664062	0.270833	0.728353	0.532884	0.776617	0.951983	0.623855	0.0542222	0.722264	0.719268	0.37481	0.713178	0.138393	0.574163	0.342268	0.853018	0.385417	0.363825	0.881481	0.631915	0.849741
781	0.809701	0.635593	0.902724	0.87037	0.519298	0.955182	0.934498	0.798122	0.992537	0.868313	0.683938	0.717842	0.690476	0.693859	0.592885	0.586292	0.675447	0.623282	0.683475	0.749324	0.452261	0.745714	0.746088	0.752016	0.770021	0.925439	0.615385	0.625698	0.699219	0.326389	0.752122	0.56661	0.774378	0.938605	0.613928	0.0737778	0.722156	0.719268	0.391707	0.751938	0.142857	0.557416	0.319588	0.855643	0.385417	0.307692	0.87963	0.631915	0.875648
782	0.813433	0.635593	0.902724	0.874074	0.870175	0.960784	0.934498	0.802817	0.992537	0.872428	0.689119	0.717842	0.68956	0.709441	0.592885	0.586292	0.670743	0.624899	0.707169	0.769595	0.452764	0.722143	0.733997	0.756048	0.782341	0.935673	0.586538	0.636872	0.707031	0.284722	0.752122	0.537099	0.769154	0.948638	0.600107	0.0844444	0.671285	0.719268	0.395086	0.775194	0.14881	0.58134	0.336082	0.866142	0.391667	0.299376	0.87963	0.631915	0.891192
783	0.813433	0.635593	0.902724	0.87037	0.873684	0.960784	0.934498	0.798122	0.988806	0.872428	0.694301	0.717842	0.691392	0.703025	0.602372	0.592898	0.675447	0.632983	0.707169	0.780405	0.450754	0.742143	0.757468	0.764113	0.790554	0.938596	0.610577	0.614525	0.675781	0.354167	0.719864	0.548904	0.766418	0.947842	0.606827	0.103667	0.724754	0.719268	0.401845	0.744186	0.150298	0.58134	0.348454	0.88189	0.391667	0.328482	0.877778	0.629787	0.906736
784	0.809701	0.635593	0.902724	0.87037	0.873684	0.957983	0.934498	0.798122	0.988806	0.872428	0.699482	0.717842	0.705128	0.710357	0.607115	0.597853	0.682973	0.645918	0.699271	0.748649	0.443216	0.726429	0.750356	0.774866	0.786448	0.934211	0.586538	0.620112	0.683594	0.309028	0.767402	0.53457	0.7699	0.945772	0.607208	0.117444	0.725944	0.719268	0.408604	0.775194	0.151786	0.562201	0.325773	0.874016	0.395833	0.334719	0.87037	0.617021	0.906736
785	0.835821	0.635593	0.902724	0.87037	0.873684	0.957983	0.934498	0.798122	0.988806	0.872428	0.699482	0.717842	0.705128	0.714024	0.607905	0.602808	0.673565	0.649151	0.707776	0.747973	0.446231	0.729286	0.760313	0.778898	0.790554	0.938596	0.596154	0.625698	0.699219	0.371528	0.75382	0.53204	0.770647	0.94394	0.615608	0.0707778	0.723347	0.719268	0.411983	0.782946	0.150298	0.509569	0.307216	0.88189	0.395833	0.24948	0.87037	0.617021	0.911917
786	0.809701	0.632768	0.898833	0.796296	0.870175	0.957983	0.930131	0.793427	0.985075	0.872428	0.704663	0.717842	0.710623	0.718607	0.609486	0.613543	0.682032	0.65481	0.705346	0.766216	0.445226	0.731429	0.75889	0.778898	0.786448	0.932749	0.620192	0.611732	0.679688	0.378472	0.765705	0.546374	0.771393	0.945294	0.623778	0.00155556	0.723238	0.719268	0.408604	0.775194	0.150298	0.552632	0.325773	0.87664	0.395833	0.735967	0.87037	0.0425532	0.909326
787	0.809701	0.632768	0.898833	0.859259	0.870175	0.957983	0.930131	0.793427	0.977612	0.868313	0.704663	0.717842	0.715201	0.722273	0.611067	0.619323	0.688617	0.657235	0.708991	0.773649	0.446231	0.730714	0.752489	0.777554	0.782341	0.928363	0.649038	0.597765	0.667969	0.375	0.791171	0.591062	0.774627	0.947125	0.610186	0.000222222	0.733088	0.719268	0.445777	0.767442	0.150298	0.535885	0.296907	0.871391	0.395833	0.343035	0.87037	0.0425532	0.906736
788	0.80597	0.632768	0.894942	0.848148	0.866667	0.957983	0.930131	0.793427	0.977612	0.868313	0.709845	0.713693	0.723443	0.721357	0.619763	0.655656	0.742239	0.665319	0.696233	0.769595	0.452764	0.736429	0.750356	0.758065	0.774127	0.926901	0.697115	0.608939	0.710938	0.381944	0.757216	0.491568	0.777114	0.946249	0.603772	0.000222222	0.730923	0.719268	0.398466	0.736434	0.14881	0.590909	0.317526	0.866142	0.395833	0.239085	0.87037	0.0425532	0.901554
789	0.80597	0.632768	0.894942	0.844444	0.866667	0.971989	0.930131	0.793427	0.977612	0.868313	0.709845	0.713693	0.72619	0.721357	0.622925	0.65896	0.739417	0.665319	0.693803	0.769595	0.452261	0.74	0.746799	0.758737	0.778234	0.926901	0.677885	0.603352	0.691406	0.447917	0.764007	0.495784	0.775124	0.946727	0.610415	0.000222222	0.732006	0.719268	0.391707	0.736434	0.147321	0.547847	0.309278	0.874016	0.395833	0.378378	0.87037	0.0425532	0.896373
790	0.802239	0.632768	0.894942	0.844444	0.866667	0.971989	0.930131	0.798122	0.981343	0.864198	0.715026	0.713693	0.715201	0.72319	0.679842	0.634187	0.728128	0.658044	0.693196	0.758784	0.453769	0.745714	0.757468	0.761425	0.767967	0.923977	0.658654	0.620112	0.679688	0.420139	0.78438	0.494941	0.791045	0.942348	0.607819	0.000222222	0.736119	0.719268	0.388328	0.728682	0.150298	0.574163	0.327835	0.879265	0.395833	0.355509	0.87037	0.0425532	0.898964
791	0.802239	0.632768	0.894942	0.844444	0.866667	0.955182	0.930131	0.798122	0.981343	0.864198	0.715026	0.713693	0.723443	0.725023	0.616601	0.622626	0.722484	0.658044	0.688335	0.767568	0.453266	0.749286	0.75889	0.760081	0.782341	0.928363	0.572115	0.636872	0.6875	0.371528	0.752122	0.480607	0.774876	0.945055	0.604459	0.000222222	0.719558	0.719268	0.381569	0.736434	0.14881	0.566986	0.321649	0.868766	0.395833	0.338877	0.87037	0.0425532	0.901554
792	0.835821	0.663842	0.918288	0.851852	0.908772	0.94958	0.956332	0.816901	0.764925	0.888889	0.73057	0.726141	0.732601	0.743355	0.624506	0.619323	0.728128	0.660469	0.693196	0.752027	0.459296	0.747857	0.747511	0.750672	0.74538	0.46345	0.658654	0.608939	0.714844	0.423611	0.740238	0.426644	0.773383	0.937968	0.650962	0.000222222	0.712415	0.719268	0.398466	0.767442	0.141369	0.633971	0.317526	0.905512	0.40625	0.376299	0.87037	0.638298	0.860104
793	0.83209	0.658192	0.918288	0.848148	0.905263	0.946779	0.951965	0.816901	0.764925	0.884774	0.725389	0.721992	0.732601	0.743355	0.627668	0.619323	0.726246	0.660469	0.693196	0.75	0.451256	0.749286	0.753201	0.75336	0.73306	0.900585	0.677885	0.608939	0.726562	0.333333	0.730051	0.425801	0.773134	0.940755	0.668448	0.000222222	0.717502	0.719268	0.405225	0.775194	0.141369	0.593301	0.340206	0.892388	0.40625	0.432432	0.87037	0.638298	0.860104
794	0.828358	0.658192	0.914397	0.844444	0.905263	0.943978	0.951965	0.816901	0.761194	0.884774	0.720207	0.721992	0.730769	0.743355	0.63004	0.620974	0.728128	0.660469	0.694411	0.74527	0.438693	0.737143	0.750356	0.761425	0.724846	0.897661	0.692308	0.592179	0.710938	0.298611	0.735144	0.43086	0.775373	0.940596	0.661347	0.000222222	0.709384	0.719268	0.398466	0.767442	0.141369	0.617225	0.298969	0.900262	0.40625	0.449064	0.87037	0.638298	0.854922
795	0.824627	0.655367	0.906615	0.844444	0.901754	0.943978	0.947598	0.812207	0.757463	0.884774	0.720207	0.717842	0.735348	0.745188	0.628458	0.620974	0.722484	0.662086	0.702309	0.748649	0.446231	0.741429	0.746799	0.766801	0.724846	0.897661	0.6875	0.603352	0.722656	0.364583	0.728353	0.438449	0.778358	0.943223	0.665776	0.000222222	0.711549	0.719268	0.384948	0.744186	0.139881	0.626794	0.298969	0.115486	0.40625	0.45738	0.87037	0.638298	0.849741
796	0.820896	0.655367	0.906615	0.837037	0.898246	0.941176	0.943231	0.807512	0.757463	0.876543	0.715026	0.717842	0.734432	0.747021	0.63083	0.620974	0.722484	0.663703	0.704739	0.768243	0.444221	0.76	0.756757	0.756048	0.728953	0.899123	0.677885	0.614525	0.746094	0.295139	0.724958	0.39629	0.779602	0.94179	0.658598	0.000222222	0.709492	0.719268	0.37481	0.736434	0.136905	0.593301	0.298969	0.905512	0.40625	0.438669	0.87037	0.617021	0.854922
797	0.817164	0.652542	0.902724	0.837037	0.894737	0.938375	0.943231	0.802817	0.753731	0.876543	0.709845	0.713693	0.735348	0.745188	0.627668	0.620974	0.724365	0.663703	0.691981	0.760135	0.421608	0.740714	0.746088	0.750672	0.73306	0.904971	0.682692	0.597765	0.699219	0.354167	0.740238	0.381113	0.782338	0.945214	0.676084	0.000222222	0.702024	0.719268	0.371431	0.736434	0.135417	0.598086	0.323711	0.910761	0.40625	0.486486	0.87037	0.617021	0.854922
798	0.817164	0.652542	0.898833	0.833333	0.894737	0.938375	0.943231	0.802817	0.753731	0.872428	0.709845	0.713693	0.735348	0.745188	0.623715	0.6218	0.727187	0.663703	0.692588	0.761486	0.448744	0.81	0.744666	0.747312	0.737166	0.906433	0.682692	0.617318	0.78125	0.34375	0.731749	0.385329	0.785821	0.946011	0.632178	0.000222222	0.686871	0.719268	0.371431	0.736434	0.135417	0.578947	0.290722	0.902887	0.40625	0.386694	0.87037	0.617021	0.860104
799	0.813433	0.646893	0.898833	0.833333	0.891228	0.935574	0.938865	0.798122	0.75	0.872428	0.704663	0.709544	0.738095	0.747021	0.628458	0.622626	0.733772	0.663703	0.691981	0.762162	0.455276	0.737857	0.743243	0.747984	0.741273	0.904971	0.692308	0.659218	0.796875	0.347222	0.735144	0.403035	0.783831	0.946727	0.632025	0.000222222	0.686546	0.719268	0.37481	0.736434	0.135417	0.578947	0.296907	0.897638	0.40625	0.399168	0.87037	0.595745	0.865285
800	0.809701	0.646893	0.894942	0.833333	0.891228	0.994398	0.934498	0.798122	0.757463	0.872428	0.699482	0.709544	0.735348	0.745188	0.629249	0.617671	0.728128	0.655618	0.685905	0.758784	0.437688	0.733571	0.744666	0.747984	0.74538	0.910819	0.620192	0.597765	0.78125	0.350694	0.747029	0.395447	0.823632	0.947205	0.667914	0.000222222	0.0051629	0.719268	0.395086	0.75969	0.139881	0.504785	0.340206	0.902887	0.401042	0.488565	0.87037	0.595745	0.870466
801	0.809701	0.646893	0.894942	0.837037	0.894737	0.938375	0.934498	0.798122	0.791045	0.872428	0.704663	0.709544	0.734432	0.747021	0.63004	0.61602	0.730009	0.656427	0.688943	0.757432	0.447739	0.733571	0.75889	0.770833	0.749487	0.916667	0.610577	0.597765	0.667969	0.392361	0.740238	0.390388	0.776368	0.946648	0.657147	0.000222222	0.482844	0.719268	0.395086	0.767442	0.141369	0.478469	0.321649	0.902887	0.395833	0.424116	0.875926	0.595745	0.875648
802	0.809701	0.646893	0.894942	0.837037	0.894737	0.938375	0.934498	0.798122	0.768657	0.872428	0.704663	0.709544	0.738095	0.750687	0.601581	0.619323	0.726246	0.663703	0.712637	0.756081	0.460302	0.760714	0.761735	0.763441	0.74538	0.915205	0.673077	0.603352	0.691406	0.319444	0.740238	0.408094	0.774876	0.944816	0.647221	0.000222222	0.477433	0.719268	0.395086	0.782946	0.141369	0.504785	0.325773	0.902887	0.395833	0.417879	0.877778	0.617021	0.870466
803	0.809701	0.646893	0.894942	0.840741	0.898246	0.938375	0.934498	0.798122	0.783582	0.872428	0.704663	0.713693	0.740842	0.750687	0.637154	0.620149	0.735654	0.666936	0.713852	0.764865	0.453769	0.746429	0.766003	0.768817	0.74538	0.918129	0.663462	0.659218	0.777344	0.375	0.733447	0.387015	0.775871	0.946966	0.665012	0.000222222	0.703431	0.719268	0.391707	0.806202	0.144345	0.590909	0.309278	0.902887	0.395833	0.318087	0.875926	0.617021	0.870466
804	0.813433	0.646893	0.894942	0.837037	0.901754	0.938375	0.934498	0.798122	0.809701	0.893004	0.704663	0.713693	0.742674	0.750687	0.637154	0.620974	0.71778	0.666936	0.695626	0.77027	0.439196	0.746429	0.761735	0.770161	0.753593	0.915205	0.663462	0.564246	0.605469	0.326389	0.733447	0.365093	0.777114	0.944259	0.645693	0.000222222	0.708626	0.719268	0.381569	0.767442	0.139881	0.519139	0.321649	0.902887	0.395833	0.407484	0.875926	0.617021	0.875648
805	0.813433	0.646893	0.894942	0.837037	0.901754	0.938375	0.934498	0.802817	0.787313	0.876543	0.709845	0.717842	0.742674	0.754354	0.639526	0.632535	0.726246	0.668553	0.693196	0.762838	0.626633	0.761429	0.761024	0.764785	0.74538	0.916667	0.692308	0.581006	0.652344	0.392361	0.721562	0.38027	0.776617	0.940516	0.652337	0.000222222	0.705812	0.719268	0.384948	0.75969	0.138393	0.562201	0.303093	0.902887	0.395833	0.455301	0.875926	0.617021	0.875648
806	0.813433	0.646893	0.894942	0.837037	0.905263	0.941176	0.938865	0.802817	0.854478	0.872428	0.709845	0.717842	0.74359	0.754354	0.638735	0.634187	0.730009	0.668553	0.692588	0.777703	0.453769	0.756429	0.762447	0.774866	0.741273	0.910819	0.692308	0.558659	0.597656	0.329861	0.724958	0.379427	0.778607	0.941631	0.640806	0.000222222	0.707544	0.719268	0.378189	0.75969	0.136905	0.511962	0.342268	0.913386	0.401042	0.413721	0.874074	0.617021	0.870466
807	0.813433	0.646893	0.894942	0.840741	0.905263	0.943978	0.938865	0.713615	0.876866	0.872428	0.709845	0.717842	0.74359	0.752521	0.639526	0.642444	0.720602	0.67017	0.696233	0.84527	0.448241	0.759286	0.766003	0.771505	0.749487	0.906433	0.6875	0.586592	0.640625	0.395833	0.718166	0.381113	0.779353	0.941631	0.642181	0.0301111	0.708951	0.719268	0.371431	0.75969	0.136905	0.555024	0.34433	0.908136	0.401042	0.463617	0.874074	0.617021	0.870466
808	0.817164	0.649718	0.894942	0.825926	0.905263	0.943978	0.938865	0.807512	0.873134	0.872428	0.709845	0.717842	0.742674	0.754354	0.638735	0.640793	0.70555	0.67017	0.690765	0.766216	0.438191	0.752143	0.757468	0.770161	0.753593	0.909357	0.706731	0.581006	0.609375	0.340278	0.735144	0.304384	0.779602	0.940357	0.64325	0.0502222	0.707003	0.719268	0.354533	0.75969	0.135417	0.641148	0.294845	0.910761	0.40625	0.509356	0.87037	0.617021	0.870466
809	0.817164	0.649718	0.894942	0.837037	0.908772	0.943978	0.938865	0.807512	0.914179	0.872428	0.709845	0.717842	0.74359	0.752521	0.639526	0.639141	0.703669	0.671787	0.697448	0.758784	0.48392	0.732857	0.753912	0.761425	0.770021	0.909357	0.706731	0.586592	0.625	0.350694	0.780985	0.43339	0.782587	0.939481	0.654169	0.000222222	0.709168	0.719268	0.341016	0.744186	0.133929	0.555024	0.325773	0.905512	0.40625	0.349272	0.87037	0.617021	0.875648
810	0.817164	0.646893	0.894942	0.833333	0.908772	0.946779	0.938865	0.807512	0.970149	0.872428	0.704663	0.717842	0.739927	0.752521	0.636364	0.644096	0.707432	0.668553	0.694411	0.748649	0.444724	0.73	0.743243	0.759409	0.749487	0.902047	0.721154	0.575419	0.601562	0.399306	0.777589	0.443508	0.783831	0.939083	0.65142	0.000222222	0.698236	0.719268	0.344395	0.736434	0.133929	0.619617	0.319588	0.91601	0.40625	0.490644	0.888889	0.595745	0.870466
811	0.817164	0.646893	0.894942	0.833333	0.908772	0.946779	0.938865	0.807512	0.981343	0.872428	0.704663	0.717842	0.740842	0.752521	0.634783	0.642444	0.709313	0.668553	0.695018	0.746622	0.445729	0.735	0.74111	0.763441	0.74538	0.897661	0.721154	0.575419	0.605469	0.329861	0.792869	0.438449	0.785075	0.945931	0.657376	0.000222222	0.702565	0.719268	0.351154	0.72093	0.133929	0.626794	0.286598	0.91601	0.40625	0.322245	0.87037	0.595745	0.865285
812	0.813433	0.646893	0.894942	0.837037	0.905263	0.946779	0.934498	0.802817	0.988806	0.872428	0.704663	0.717842	0.738095	0.748854	0.635573	0.642444	0.703669	0.666936	0.698663	0.766216	0.447236	0.737857	0.746799	0.764113	0.737166	0.894737	0.711538	0.603352	0.671875	0.302083	0.7691	0.442664	0.784577	0.943542	0.639585	0.000222222	0.695855	0.719268	0.364672	0.736434	0.135417	0.562201	0.329897	0.905512	0.40625	0.455301	0.87037	0.595745	0.865285
813	0.813433	0.646893	0.891051	0.837037	0.905263	0.946779	0.934498	0.798122	0.985075	0.872428	0.699482	0.717842	0.737179	0.747021	0.633202	0.641618	0.702728	0.665319	0.698663	0.77027	0.447739	0.737143	0.744666	0.768145	0.73922	0.926901	0.706731	0.603352	0.679688	0.347222	0.782683	0.450253	0.788806	0.942348	0.634469	0.000222222	0.693906	0.719268	0.351154	0.736434	0.136905	0.569378	0.325773	0.866142	0.40625	0.482328	0.87037	0.595745	0.862694
814	0.813433	0.646893	0.891051	0.837037	0.905263	0.946779	0.934498	0.798122	0.985075	0.872428	0.689119	0.717842	0.734432	0.743355	0.63004	0.640793	0.694262	0.663703	0.708991	0.770946	0.451256	0.739286	0.74111	0.768817	0.741273	0.893275	0.6875	0.603352	0.6875	0.368056	0.765705	0.435076	0.788308	0.942348	0.629429	0.000222222	0.692607	0.719268	0.357913	0.736434	0.135417	0.555024	0.307216	0.889764	0.40625	0.405405	0.87037	0.574468	0.860104
815	0.813433	0.644068	0.88716	0.82963	0.898246	0.943978	0.930131	0.798122	0.992537	0.872428	0.689119	0.713693	0.738095	0.747021	0.629249	0.63749	0.714958	0.666936	0.708991	0.776351	0.460302	0.746429	0.748222	0.765457	0.743326	0.897661	0.692308	0.589385	0.671875	0.333333	0.772496	0.462901	0.787562	0.93972	0.633705	0.000222222	0.692824	0.719268	0.341016	0.72093	0.13244	0.559809	0.325773	0.889764	0.40625	0.405405	0.87037	0.617021	0.865285
816	0.880597	0.675141	0.941634	0.877778	0.915789	0.980392	0.973799	0.849765	0.80597	0.909465	0.735751	0.73444	0.710623	0.71769	0.609486	0.604459	0.658514	0.644301	0.68955	0.746622	0.448241	0.717857	0.743243	0.75672	0.770021	0.894737	0.639423	0.620112	0.695312	0.371528	0.755518	0.466273	0.760945	0.926103	0.671732	0.085	0.770646	0.719268	0.408604	0.806202	0.151786	0.590909	0.305155	0.902887	0.40625	0.370062	0.87037	0.680851	0.880829
817	0.876866	0.672316	0.941634	0.877778	0.915789	0.977591	0.973799	0.84507	0.80597	0.90535	0.735751	0.73444	0.710623	0.71769	0.614229	0.597853	0.66604	0.645918	0.707776	0.752027	0.443719	0.730714	0.752489	0.760081	0.774127	0.899123	0.591346	0.631285	0.695312	0.364583	0.75382	0.468803	0.759453	0.925625	0.680284	0.0883333	0.770971	0.719268	0.401845	0.790698	0.151786	0.433014	0.294845	0.895013	0.40625	0.268191	0.87037	0.680851	0.88601
818	0.876866	0.672316	0.937743	0.877778	0.912281	0.977591	0.969432	0.840376	0.798507	0.90535	0.735751	0.73444	0.715201	0.722273	0.61502	0.611065	0.684854	0.649151	0.702916	0.75473	0.456784	0.747143	0.751778	0.763441	0.770021	0.899123	0.653846	0.603352	0.683594	0.34375	0.743633	0.450253	0.760448	0.927457	0.674786	0.0867778	0.774218	0.719268	0.405225	0.79845	0.153274	0.519139	0.313402	0.897638	0.40625	0.365904	0.87037	0.680851	0.893782
819	0.873134	0.669492	0.937743	0.874074	0.908772	0.977591	0.969432	0.840376	0.798507	0.901235	0.735751	0.73029	0.722527	0.725023	0.618182	0.617671	0.686736	0.654002	0.695626	0.749324	0.449749	0.750714	0.751067	0.763441	0.774127	0.897661	0.615385	0.597765	0.6875	0.413194	0.743633	0.435919	0.760697	0.928651	0.673183	0.0913333	0.782444	0.719268	0.405225	0.79845	0.151786	0.480861	0.270103	0.889764	0.40625	0.365904	0.87037	0.702128	0.891192
820	0.869403	0.669492	0.933852	0.866667	0.908772	0.977591	0.969432	0.840376	0.798507	0.901235	0.735751	0.73029	0.727106	0.725023	0.626877	0.644096	0.722484	0.658852	0.694411	0.732432	0.454774	0.727857	0.733286	0.757392	0.761807	0.890351	0.668269	0.592179	0.6875	0.34375	0.747029	0.450253	0.764428	0.928014	0.629963	0.0941111	0.783851	0.719268	0.398466	0.790698	0.150298	0.543062	0.309278	0.88189	0.40625	0.301455	0.87037	0.702128	0.880829
821	0.869403	0.669492	0.933852	0.862963	0.908772	0.977591	0.969432	0.840376	0.798507	0.901235	0.735751	0.73029	0.729853	0.725023	0.627668	0.645747	0.728128	0.65966	0.693196	0.74527	0.444724	0.753571	0.752489	0.762769	0.759754	0.890351	0.692308	0.597765	0.6875	0.364583	0.752122	0.464587	0.764925	0.929288	0.6489	0.0793333	0.777465	0.719268	0.391707	0.782946	0.14881	0.471292	0.278351	0.895013	0.40625	0.351351	0.87037	0.702128	0.875648
822	0.865672	0.666667	0.929961	0.859259	0.905263	0.97479	0.969432	0.835681	0.794776	0.897119	0.73057	0.73029	0.727106	0.725023	0.627668	0.647399	0.720602	0.657235	0.690765	0.74527	0.448241	0.751429	0.758179	0.758737	0.7577	0.890351	0.673077	0.586592	0.671875	0.350694	0.748727	0.467116	0.762935	0.928492	0.640577	0.0922222	0.776816	0.719268	0.388328	0.790698	0.147321	0.45933	0.280412	0.897638	0.40625	0.303534	0.87037	0.680851	0.875648
823	0.865672	0.666667	0.929961	0.859259	0.905263	0.977591	0.969432	0.826291	0.798507	0.897119	0.735751	0.73029	0.727106	0.72319	0.627668	0.64905	0.722484	0.657235	0.691373	0.743919	0.453266	0.748571	0.758179	0.760753	0.761807	0.891813	0.668269	0.592179	0.671875	0.340278	0.748727	0.476391	0.762935	0.928412	0.640806	0.0952222	0.777465	0.719268	0.388328	0.79845	0.14881	0.480861	0.274227	0.895013	0.40625	0.340956	0.87037	0.680851	0.878238
824	0.86194	0.666667	0.92607	0.859259	0.905263	0.97479	0.969432	0.835681	0.809701	0.893004	0.73057	0.726141	0.725275	0.736022	0.624506	0.624277	0.707432	0.657235	0.709599	0.772973	0.451759	0.768571	0.76458	0.769489	0.7577	0.888889	0.668269	0.597765	0.671875	0.368056	0.748727	0.468803	0.762935	0.930881	0.539859	0.087	0.7569	0.719268	0.388328	0.790698	0.147321	0.547847	0.331959	0.944882	0.40625	0.0935551	0.87037	0.659574	0.875648
825	0.86194	0.666667	0.92607	0.862963	0.908772	0.97479	0.965066	0.835681	0.791045	0.893004	0.735751	0.73029	0.728022	0.729606	0.625296	0.624277	0.707432	0.658852	0.710207	0.771622	0.445729	0.763571	0.757468	0.768817	0.765914	0.896199	0.610577	0.597765	0.675781	0.385417	0.748727	0.505059	0.755473	0.928412	0.663103	0.125444	0.788938	0.719268	0.405225	0.821705	0.151786	0.511962	0.290722	0.892388	0.40625	0.326403	0.87037	0.702128	0.880829
826	0.865672	0.669492	0.929961	0.866667	0.912281	0.980392	0.969432	0.840376	0.794776	0.897119	0.746114	0.73444	0.729853	0.739688	0.626087	0.624277	0.707432	0.660469	0.705346	0.764189	0.422613	0.750714	0.761735	0.770833	0.7577	0.887427	0.639423	0.608939	0.691406	0.347222	0.721562	0.482293	0.753483	0.925386	0.658522	0.152111	0.793701	0.719268	0.422122	0.837209	0.15625	0.535885	0.315464	0.887139	0.40625	0.359667	0.87037	0.723404	0.875648
827	0.869403	0.672316	0.929961	0.87037	0.915789	0.980392	0.973799	0.84507	0.798507	0.901235	0.751295	0.738589	0.732601	0.743355	0.63004	0.629232	0.713076	0.663703	0.710207	0.767568	0.443216	0.754286	0.763158	0.77621	0.753593	0.887427	0.649038	0.603352	0.6875	0.395833	0.740238	0.484823	0.751493	0.921882	0.655162	0.161889	0.80604	0.719268	0.425501	0.844961	0.15625	0.538278	0.331959	0.892388	0.40625	0.347193	0.87037	0.744681	0.875648
828	0.876866	0.677966	0.937743	0.877778	0.919298	0.983193	0.978166	0.849765	0.802239	0.90535	0.761658	0.742739	0.738095	0.741522	0.633992	0.627581	0.707432	0.666936	0.710814	0.768919	0.447739	0.763571	0.768848	0.77621	0.765914	0.891813	0.629808	0.620112	0.722656	0.475694	0.740238	0.46543	0.749502	0.919971	0.638974	0.175111	0.817946	0.719268	0.435639	0.844961	0.157738	0.547847	0.313402	0.889764	0.40625	0.295218	0.87037	0.744681	0.865285
829	0.880597	0.680791	0.941634	0.881481	0.926316	0.985994	0.982533	0.859155	0.809701	0.909465	0.766839	0.746888	0.738095	0.741522	0.636364	0.635838	0.711195	0.666936	0.702916	0.778378	0.455276	0.759286	0.761024	0.777554	0.770021	0.897661	0.591346	0.597765	0.660156	0.409722	0.716469	0.457841	0.745025	0.915671	0.665699	0.168111	0.82996	0.719268	0.43226	0.852713	0.160714	0.507177	0.28866	0.889764	0.40625	0.257796	0.87037	0.744681	0.880829
830	0.880597	0.683616	0.945525	0.881481	0.926316	0.985994	0.982533	0.86385	0.809701	0.91358	0.772021	0.755187	0.738095	0.741522	0.633992	0.642444	0.713076	0.666936	0.701094	0.781757	0.458291	0.753571	0.757468	0.778898	0.774127	0.897661	0.610577	0.597765	0.667969	0.371528	0.70798	0.452782	0.744279	0.916069	0.658064	0.169778	0.831475	0.719268	0.435639	0.860465	0.160714	0.566986	0.284536	0.889764	0.40625	0.278586	0.87037	0.765957	0.88601
831	0.884328	0.686441	0.949416	0.885185	0.929825	0.985994	0.9869	0.86385	0.813433	0.917695	0.772021	0.755187	0.739927	0.741522	0.633202	0.63749	0.709313	0.666936	0.699878	0.781757	0.457789	0.765	0.75889	0.774866	0.774127	0.897661	0.572115	0.614525	0.695312	0.420139	0.677419	0.452782	0.745025	0.915273	0.660354	0.164889	0.832341	0.719268	0.43226	0.852713	0.160714	0.562201	0.286598	0.88189	0.40625	0.351351	0.87037	0.765957	0.88601
832	0.88806	0.689266	0.957198	0.888889	0.933333	0.985994	0.991266	0.86385	0.813433	0.917695	0.782383	0.759336	0.742674	0.741522	0.632411	0.644096	0.716839	0.668553	0.698056	0.763514	0.455779	0.752857	0.756046	0.778898	0.774127	0.897661	0.610577	0.614525	0.703125	0.399306	0.629881	0.445194	0.746517	0.921325	0.630269	0.154778	0.832558	0.719268	0.43226	0.852713	0.159226	0.583732	0.317526	0.892388	0.40625	0.253638	0.87037	0.765957	0.891192
833	0.884328	0.686441	0.957198	0.885185	0.936842	0.983193	0.991266	0.86385	0.809701	0.917695	0.777202	0.759336	0.732601	0.739688	0.624506	0.612717	0.716839	0.662086	0.693196	0.750676	0.449246	0.735714	0.733997	0.757392	0.761807	0.899123	0.586538	0.614525	0.667969	0.517361	0.643463	0.408094	0.756716	0.921803	0.657147	0.126778	0.779846	0.719268	0.418742	0.837209	0.15625	0.562201	0.284536	0.900262	0.40625	0.397089	0.87037	0.723404	0.891192
834	0.873134	0.683616	0.953307	0.877778	0.933333	0.971989	0.9869	0.849765	0.798507	0.91358	0.766839	0.755187	0.730769	0.736022	0.621344	0.609414	0.714958	0.657235	0.682868	0.740541	0.445729	0.716429	0.750356	0.764785	0.7577	0.902047	0.634615	0.603352	0.6875	0.447917	0.643463	0.408094	0.76194	0.929049	0.67135	0.0925556	0.755818	0.719268	0.422122	0.813953	0.150298	0.602871	0.245361	0.902887	0.40625	0.413721	0.87037	0.680851	0.880829
835	0.873134	0.683616	0.953307	0.877778	0.933333	0.971989	0.982533	0.849765	0.798507	0.91358	0.766839	0.755187	0.730769	0.736022	0.622925	0.607762	0.709313	0.657235	0.682868	0.741216	0.445226	0.722857	0.747511	0.757392	0.753593	0.897661	0.649038	0.603352	0.703125	0.444444	0.629881	0.410624	0.761692	0.928571	0.67135	0.0924444	0.754302	0.719268	0.422122	0.813953	0.150298	0.602871	0.280412	0.900262	0.40625	0.405405	0.87037	0.680851	0.880829
836	0.865672	0.680791	0.949416	0.874074	0.929825	0.969188	0.982533	0.84507	0.791045	0.909465	0.756477	0.746888	0.725275	0.739688	0.627668	0.59455	0.714958	0.657235	0.673755	0.75473	0.436181	0.722143	0.742532	0.75336	0.749487	0.894737	0.673077	0.592179	0.695312	0.385417	0.758913	0.38027	0.763433	0.931757	0.677535	0.0732222	0.749324	0.719268	0.43226	0.806202	0.150298	0.583732	0.210309	0.913386	0.40625	0.430353	0.888889	0.680851	0.870466
837	0.858209	0.675141	0.941634	0.866667	0.926316	0.963585	0.973799	0.835681	0.783582	0.90535	0.751295	0.742739	0.730769	0.741522	0.63004	0.611065	0.716839	0.658852	0.681045	0.750676	0.434171	0.737857	0.741821	0.752016	0.728953	0.890351	0.682692	0.603352	0.710938	0.420139	0.748727	0.399663	0.766418	0.933588	0.697007	0.0533333	0.739907	0.719268	0.43226	0.806202	0.150298	0.590909	0.142268	0.905512	0.40625	0.432432	0.87037	0.680851	0.860104
838	0.847015	0.669492	0.933852	0.862963	0.919298	0.957983	0.969432	0.830986	0.776119	0.901235	0.740933	0.73444	0.729853	0.741522	0.618182	0.614368	0.726246	0.656427	0.698663	0.761486	0.465829	0.748571	0.73542	0.758737	0.743326	0.888889	0.677885	0.620112	0.714844	0.388889	0.747029	0.356661	0.771144	0.935897	0.65142	0.00222222	0.71826	0.719268	0.422122	0.775194	0.144345	0.605263	0.371134	0.910761	0.40625	0.422037	0.87037	0.638298	0.854922
839	0.843284	0.669492	0.929961	0.859259	0.915789	0.955182	0.965066	0.826291	0.772388	0.897119	0.735751	0.73444	0.728938	0.737855	0.622134	0.614368	0.724365	0.655618	0.688335	0.762162	0.456281	0.755	0.741821	0.75336	0.741273	0.899123	0.692308	0.592179	0.675781	0.333333	0.745331	0.439292	0.773383	0.938525	0.680437	0.00188889	0.71577	0.719268	0.411983	0.767442	0.141369	0.61244	0.356701	0.905512	0.40625	0.409563	0.87037	0.638298	0.854922
840	0.910448	0.700565	0.980545	0.903704	0.936842	0.988796	0.9869	0.896714	0.824627	0.942387	0.751295	0.742739	0.738095	0.737855	0.634783	0.614368	0.673565	0.663703	0.705346	0.772297	0.463317	0.771429	0.756757	0.766129	0.76386	0.899123	0.634615	0.648045	0.722656	0.416667	0.779287	0.387015	0.764428	0.922679	0.615073	0.0682222	0.75506	0.719268	0.391707	0.782946	0.150298	0.255981	0.2	0.884514	0.401042	0.29106	0.883333	0.676596	0.880829
841	0.902985	0.69209	0.953307	0.911111	0.933333	0.985994	0.982533	0.882629	0.817164	0.942387	0.740933	0.73444	0.732601	0.728689	0.63083	0.632535	0.709313	0.660469	0.710207	0.756081	0.443216	0.752143	0.744666	0.75672	0.753593	0.897661	0.706731	0.558659	0.589844	0.489583	0.758913	0.402192	0.767662	0.925944	0.636836	0.074	0.764368	0.719268	0.37481	0.75969	0.141369	0.248804	0.181443	0.884514	0.401042	0.343035	0.874074	0.67234	0.875648
842	0.902985	0.69209	0.972763	0.892593	0.929825	0.985994	0.978166	0.882629	0.817164	0.934156	0.740933	0.73444	0.732601	0.726856	0.63004	0.634187	0.711195	0.660469	0.710207	0.756081	0.448241	0.75	0.745377	0.764785	0.753593	0.894737	0.711538	0.553073	0.589844	0.486111	0.757216	0.403879	0.768408	0.926262	0.635767	0.074	0.765451	0.719268	0.37481	0.75969	0.141369	0.236842	0.150515	0.887139	0.401042	0.359667	0.87037	0.67234	0.875648
843	0.902985	0.689266	0.968872	0.892593	0.929825	0.985994	0.978166	0.877934	0.817164	0.930041	0.740933	0.73029	0.734432	0.722273	0.63083	0.644096	0.724365	0.660469	0.710814	0.760135	0.443719	0.75	0.746088	0.784946	0.7577	0.903509	0.711538	0.541899	0.578125	0.517361	0.75382	0.379427	0.769403	0.925147	0.611332	0.0784444	0.770971	0.719268	0.37481	0.751938	0.141369	0.246411	0.17732	0.900262	0.401042	0.322245	0.87963	0.680851	0.870466
844	0.847015	0.728814	0.953307	0.881481	0.929825	0.985994	0.978166	0.877934	0.820896	0.930041	0.740933	0.73029	0.732601	0.726856	0.632411	0.640793	0.726246	0.662086	0.702916	0.756081	0.445226	0.742857	0.74111	0.760081	0.74538	0.896199	0.721154	0.547486	0.601562	0.388889	0.760611	0.344013	0.770896	0.925545	0.614921	0.0752222	0.765343	0.719268	0.371431	0.744186	0.139881	0.26555	0.175258	0.887139	0.401042	0.316008	0.87963	0.680851	0.865285
845	0.895522	0.686441	0.964981	0.885185	0.929825	0.983193	0.973799	0.873239	0.817164	0.925926	0.735751	0.73029	0.735348	0.726856	0.633992	0.634187	0.722484	0.662086	0.698663	0.75473	0.448241	0.742857	0.743954	0.765457	0.749487	0.888889	0.711538	0.553073	0.605469	0.475694	0.765705	0.354132	0.770896	0.926421	0.626833	0.0565556	0.76978	0.719268	0.371431	0.744186	0.138393	0.19378	0.109278	0.887139	0.401042	0.31185	0.883333	0.682979	0.865285
846	0.891791	0.683616	0.961089	0.881481	0.926316	0.983193	0.973799	0.868545	0.813433	0.921811	0.73057	0.726141	0.732601	0.726856	0.626087	0.625929	0.688617	0.660469	0.700486	0.756081	0.463819	0.751429	0.761735	0.778226	0.7577	0.896199	0.663462	0.597765	0.617188	0.395833	0.752122	0.341484	0.773383	0.930403	0.607743	0.000222222	0.757658	0.719268	0.368051	0.744186	0.138393	0.255981	0.115464	0.88189	0.401042	0.278586	0.87963	0.642553	0.865285
847	0.88806	0.677966	0.957198	0.881481	0.922807	0.980392	0.969432	0.859155	0.809701	0.917695	0.73057	0.721992	0.729853	0.734189	0.606324	0.642444	0.707432	0.658852	0.702916	0.750676	0.463317	0.75	0.757468	0.749328	0.7577	0.896199	0.701923	0.558659	0.59375	0.482639	0.772496	0.300169	0.775871	0.927775	0.596365	0.000222222	0.741098	0.719268	0.364672	0.744186	0.136905	0.236842	0.125773	0.889764	0.401042	0.318087	0.874074	0.644681	0.870466
848	0.88806	0.677966	0.953307	0.877778	0.922807	0.977591	0.969432	0.859155	0.80597	0.917695	0.73057	0.721992	0.728022	0.730522	0.622925	0.611065	0.677328	0.657235	0.693196	0.734459	0.443216	0.714286	0.753201	0.758737	0.770021	0.897661	0.581731	0.581006	0.617188	0.454861	0.765705	0.365093	0.765672	0.927138	0.683797	0.0836667	0.765992	0.719268	0.371431	0.75969	0.139881	0.478469	0.286598	0.908136	0.40625	0.496881	0.87037	0.659574	0.875648
849	0.88806	0.677966	0.953307	0.877778	0.922807	0.980392	0.969432	0.859155	0.809701	0.917695	0.735751	0.726141	0.729853	0.729606	0.620553	0.599505	0.669802	0.656427	0.691981	0.756081	0.442714	0.741429	0.752489	0.767473	0.774127	0.896199	0.543269	0.603352	0.625	0.440972	0.777589	0.36425	0.758955	0.92889	0.709148	0.104556	0.823141	0.719268	0.381569	0.782946	0.144345	0.566986	0.292784	0.913386	0.40625	0.511435	0.851852	0.680851	0.880829
850	0.891791	0.680791	0.957198	0.885185	0.929825	0.985994	0.973799	0.868545	0.817164	0.921811	0.746114	0.726141	0.725275	0.729606	0.618182	0.603633	0.669802	0.654002	0.691981	0.754054	0.447236	0.738571	0.744666	0.758065	0.774127	0.899123	0.591346	0.592179	0.652344	0.347222	0.765705	0.375211	0.752736	0.920449	0.635156	0.135111	0.795108	0.719268	0.388328	0.806202	0.14881	0.519139	0.278351	0.910761	0.40625	0.405405	0.87037	0.723404	0.88601
851	0.899254	0.686441	0.961089	0.896296	0.933333	1	0.978166	0.971831	0.824627	0.925926	0.751295	0.738589	0.71978	0.725023	0.617391	0.599505	0.650988	0.650768	0.688335	0.746622	0.458794	0.732143	0.744666	0.751344	0.770021	0.897661	0.557692	0.625698	0.664062	0.444444	0.7691	0.381113	0.750249	0.917344	0.689676	0.148667	0.803225	0.719268	0.398466	0.837209	0.153274	0.562201	0.307216	0.895013	0.40625	0.43659	0.87037	0.744681	0.88601
852	0.902985	0.689266	0.961089	0.896296	0.936842	0.988796	0.978166	0.877934	0.828358	0.930041	0.756477	0.659751	0.718864	0.724106	0.616601	0.607762	0.651929	0.649151	0.690158	0.747973	0.452764	0.736429	0.747511	0.752016	0.770021	0.902047	0.620192	0.614525	0.648438	0.440972	0.78438	0.372681	0.751741	0.916627	0.68876	0.157889	0.804091	0.719268	0.395086	0.837209	0.150298	0.566986	0.31134	0.902887	0.40625	0.434511	0.87037	0.765957	0.88342
853	0.902985	0.689266	0.961089	0.896296	0.936842	0.991597	0.982533	0.877934	0.828358	0.930041	0.761658	0.746888	0.717949	0.722273	0.0616601	0.606111	0.652869	0.647534	0.68955	0.745946	0.452764	0.730714	0.741821	0.75	0.770021	0.896199	0.634615	0.597765	0.625	0.427083	0.7691	0.369309	0.748756	0.913601	0.693494	0.162333	0.80604	0.719268	0.398466	0.837209	0.153274	0.57177	0.315464	0.908136	0.40625	0.411642	0.851852	0.765957	0.88601
854	0.910448	0.689266	0.964981	0.903704	0.940351	0.991597	0.9869	0.887324	0.83209	0.934156	0.766839	0.755187	0.721612	0.72319	0.617391	0.606936	0.646284	0.649151	0.682868	0.753378	0.453769	0.736429	0.744666	0.765457	0.772074	0.899123	0.629808	0.603352	0.632812	0.388889	0.782683	0.418212	0.749005	0.911132	0.689676	0.172111	0.817729	0.719268	0.405225	0.852713	0.14881	0.607656	0.307216	0.895013	0.40625	0.409563	0.87037	0.787234	0.88601
855	0.914179	0.69774	0.972763	0.911111	0.94386	0.994398	0.991266	0.892019	0.835821	0.938272	0.772021	0.759336	0.722527	0.721357	0.616601	0.607762	0.639699	0.64996	0.708991	0.760135	0.456784	0.734286	0.746799	0.767473	0.770021	0.897661	0.625	0.608939	0.644531	0.368056	0.792869	0.48145	0.74602	0.913123	0.683262	0.172667	0.823141	0.719268	0.411983	0.860465	0.160714	0.624402	0.303093	0.887139	0.40625	0.405405	0.87037	0.787234	0.88601
856	0.91791	0.700565	0.976654	0.911111	0.94386	0.994398	0.995633	0.887324	0.835821	0.938272	0.772021	0.759336	0.722527	0.728689	0.621344	0.607762	0.684854	0.655618	0.693196	0.761486	0.452764	0.735	0.740398	0.770161	0.770021	0.897661	0.625	0.608939	0.664062	0.430556	0.75382	0.472175	0.74801	0.915751	0.685553	0.153333	0.819136	0.719268	0.425501	0.837209	0.157738	0.504785	0.292784	0.892388	0.40625	0.409563	0.87037	0.787234	0.88601
857	0.914179	0.69774	0.972763	0.903704	0.94386	0.994398	0.995633	0.882629	0.83209	0.938272	0.766839	0.759336	0.71978	0.715857	0.61502	0.624277	0.701787	0.649151	0.702916	0.776351	0.448241	0.743571	0.754623	0.774866	0.765914	0.897661	0.682692	0.608939	0.707031	0.489583	0.752122	0.417369	0.75199	0.913601	0.276955	0.143556	0.817621	0.719268	0.425501	0.837209	0.157738	0.545455	0.294845	0.895013	0.40625	0.120582	0.87037	0.765957	0.88601
858	0.910448	0.694915	0.968872	0.9	0.940351	0.991597	0.995633	0.877934	0.83209	0.934156	0.766839	0.755187	0.716117	0.712191	0.612648	0.624277	0.701787	0.645918	0.681652	0.728378	0.425628	0.72	0.72404	0.752016	0.761807	0.894737	0.6875	0.597765	0.675781	0.395833	0.760611	0.403035	0.753731	0.914636	0.696625	0.14	0.817296	0.719268	0.415363	0.837209	0.154762	0.54067	0.276289	0.879265	0.40625	0.451143	0.87037	0.765957	0.880829
859	0.906716	0.69209	0.968872	0.892593	0.936842	0.991597	0.991266	0.873239	0.828358	0.930041	0.761658	0.755187	0.715201	0.710357	0.609486	0.627581	0.701787	0.644301	0.676185	0.756081	0.439698	0.714286	0.720484	0.752016	0.765914	0.896199	0.692308	0.592179	0.660156	0.423611	0.760611	0.428331	0.756219	0.917821	0.70113	0.198111	0.811993	0.719268	0.401845	0.821705	0.153274	0.547847	0.28866	0.908136	0.40625	0.490644	0.87037	0.744681	0.880829
860	0.902985	0.686441	0.961089	0.9	0.933333	0.988796	0.9869	0.873239	0.824627	0.925926	0.751295	0.746888	0.710623	0.708524	0.608696	0.629232	0.70555	0.642684	0.675577	0.751351	0.440201	0.739286	0.734708	0.75672	0.761807	0.897661	0.6875	0.581006	0.648438	0.357639	0.757216	0.423272	0.758955	0.921007	0.688531	0.108222	0.799545	0.719268	0.388328	0.806202	0.150298	0.547847	0.282474	0.905512	0.40625	0.442827	0.87037	0.723404	0.880829
861	0.895522	0.686441	0.957198	0.881481	0.929825	0.985994	0.982533	0.86385	0.820896	0.917695	0.746114	0.742739	0.710623	0.706691	0.606324	0.622626	0.703669	0.641067	0.672539	0.737838	0.448241	0.716429	0.737553	0.756048	0.761807	0.897661	0.692308	0.597765	0.679688	0.420139	0.757216	0.505902	0.760945	0.921723	0.691127	0.111444	0.790454	0.719268	0.398466	0.79845	0.14881	0.54067	0.28866	0.900262	0.40625	0.434511	0.87037	0.723404	0.880829
862	0.88806	0.680791	0.949416	0.877778	0.929825	0.980392	0.982533	0.85446	0.809701	0.91358	0.740933	0.746888	0.703297	0.714024	0.606324	0.609414	0.684854	0.641067	0.67983	0.734459	0.407035	0.733571	0.729018	0.758737	0.765914	0.897661	0.682692	0.625698	0.714844	0.399306	0.736842	0.48145	0.763682	0.92682	0.675932	0.105444	0.76491	0.719268	0.405225	0.79845	0.14881	0.492823	0.305155	0.884514	0.40625	0.376299	0.87037	0.680851	0.875648
863	0.88806	0.680791	0.949416	0.877778	0.929825	0.980392	0.982533	0.85446	0.809701	0.91358	0.740933	0.738589	0.705128	0.710357	0.606324	0.609414	0.675447	0.641067	0.687728	0.735811	0.433668	0.739286	0.73542	0.765457	0.765914	0.900585	0.668269	0.642458	0.722656	0.395833	0.757216	0.474705	0.763184	0.926501	0.667761	0.102556	0.761879	0.719268	0.405225	0.806202	0.150298	0.509569	0.317526	0.926509	0.40625	0.384615	0.87037	0.680851	0.880829
864	0.891791	0.69209	0.968872	0.892593	0.922807	0.977591	0.973799	0.892019	0.779851	0.930041	0.756477	0.742739	0.757326	0.776352	0.657708	0.632535	0.709313	0.686338	0.707776	0.72973	0.443216	0.731429	0.753201	0.773522	0.774127	0.903509	0.605769	0.592179	0.617188	0.413194	0.75382	0.403035	0.772886	0.925466	0.655849	0.000222222	0.743695	0.719268	0.344395	0.821705	0.135417	0.342105	0.284536	0.895013	0.401042	0.463617	0.883333	0.638298	0.88601
865	0.88806	0.69209	0.968872	0.888889	0.919298	0.97479	0.969432	0.892019	0.779851	0.930041	0.751295	0.738589	0.753663	0.770852	0.655336	0.630884	0.709313	0.687955	0.717497	0.72973	0.443216	0.738571	0.751778	0.778226	0.774127	0.904971	0.596154	0.597765	0.632812	0.465278	0.752122	0.415683	0.773632	0.925386	0.646304	0.000222222	0.742072	0.719268	0.347775	0.821705	0.136905	0.373206	0.327835	0.900262	0.401042	0.409563	0.87963	0.638298	0.891192
866	0.88806	0.689266	0.964981	0.885185	0.915789	0.971989	0.969432	0.887324	0.779851	0.925926	0.746114	0.738589	0.751832	0.770852	0.656126	0.630884	0.703669	0.684721	0.696841	0.739189	0.447739	0.751429	0.756757	0.758065	0.778234	0.907895	0.586538	0.597765	0.640625	0.375	0.75382	0.393761	0.772388	0.928094	0.633323	0.000222222	0.737959	0.719268	0.351154	0.806202	0.136905	0.404306	0.342268	0.897638	0.401042	0.407484	0.887037	0.638298	0.898964
867	0.88806	0.689266	0.961089	0.885185	0.912281	0.971989	0.965066	0.887324	0.779851	0.921811	0.740933	0.73029	0.753663	0.769019	0.649012	0.630884	0.70555	0.684721	0.68955	0.735811	0.452764	0.751429	0.758179	0.757392	0.782341	0.904971	0.625	0.608939	0.636719	0.427083	0.755518	0.403035	0.772388	0.926183	0.63256	0.000222222	0.727784	0.719268	0.354533	0.806202	1	0.404306	0.346392	0.895013	0.401042	0.4158	0.87963	0.638298	0.898964
868	0.884328	0.686441	0.957198	0.881481	0.908772	0.969188	0.965066	0.882629	0.779851	0.921811	0.015544	0.73029	0.753663	0.76352	0.652964	0.647399	0.737535	0.683104	0.688943	0.733784	0.444221	0.751429	0.754623	0.766801	0.770021	0.897661	0.730769	0.581006	0.625	0.368056	0.755518	0.41231	0.780348	0.928253	0.643403	0.000222222	0.722481	0.719268	0.347775	0.782946	0.136905	0.38756	0.296907	0.892388	0.401042	0.390852	0.883333	0.619149	0.891192
869	0.880597	0.686441	0.957198	0.877778	0.908772	0.969188	0.965066	0.882629	0.779851	0.917695	0.735751	0.726141	0.750916	0.769019	0.651383	0.640793	0.720602	0.684721	0.68955	0.737838	0.448744	0.757857	0.753912	0.767473	0.774127	0.902047	0.697115	0.575419	0.640625	0.416667	0.755518	0.408938	0.777363	0.929447	0.639356	0.000222222	0.727243	0.719268	0.354533	0.782946	0.135417	0.37799	0.319588	0.895013	0.401042	0.4158	0.875926	0.619149	0.88601
870	0.876866	0.686441	0.953307	0.87037	0.905263	0.966387	0.960699	0.877934	0.779851	0.917695	0.73057	0.721992	0.764652	0.770852	0.650593	0.650702	0.741298	0.678254	0.690765	0.741216	0.449749	0.755	0.751067	0.763441	0.753593	0.897661	0.706731	0.575419	0.640625	0.350694	0.748727	0.425801	0.780597	0.929368	0.637523	0.000222222	0.719342	0.719268	0.347775	0.775194	0.135417	0.37799	0.292784	0.895013	0.401042	0.428274	0.875926	0.83617	0.875648
871	0.876866	0.683616	0.949416	0.866667	0.901754	0.966387	0.960699	0.877934	0.779851	0.917695	0.725389	0.721992	0.761905	0.774519	0.649802	0.65896	0.750706	0.683104	0.708991	0.737162	0.439196	0.749286	0.748933	0.766129	0.741273	0.893275	0.745192	0.567039	0.613281	0.347222	0.743633	0.43086	0.783333	0.932712	0.647755	0.000222222	0.711224	0.719268	0.347775	0.775194	0.135417	0.382775	0.331959	0.900262	0.401042	0.428274	0.87963	0.617021	0.870466
872	0.876866	0.683616	0.945525	0.866667	0.898246	0.966387	0.960699	0.873239	0.779851	0.91358	0.725389	0.717842	0.760989	0.736022	0.649802	0.64905	0.74318	0.681487	0.670717	0.726351	0.429146	0.753571	0.746088	0.756048	0.753593	0.896199	0.692308	0.597765	0.667969	0.322917	0.750424	0.392917	0.778109	0.932155	0.608506	0.000222222	0.73298	0.719268	0.354533	0.775194	0.138393	0.34689	0.327835	0.895013	0.4125	0.409563	0.875926	0.634043	0.865285
873	0.880597	0.686441	0.949416	0.87037	0.901754	0.969188	0.965066	0.887324	0.787313	0.917695	0.73057	0.726141	0.769231	0.772686	0.653755	0.655656	0.70555	0.687955	0.680437	1	0.431156	0.747857	0.734708	0.74328	0.741273	0.897661	0.663462	0.603352	0.621094	0.416667	0.7691	0.37774	0.919154	0.924032	0.659591	0.102333	0.749756	0.719268	0.361292	0.79845	0.144345	0.299043	0.274227	0.887139	0.411458	0.407484	0.874074	0.674468	0.865285
874	0.884328	0.686441	0.949416	0.874074	0.905263	0.971989	0.969432	0.892019	0.791045	0.921811	0.740933	0.73444	0.77381	0.776352	0.656917	0.657308	0.70555	0.689572	0.68469	1	0.431156	0.746429	0.73542	0.747984	0.753593	0.893275	0.692308	0.603352	0.636719	0.34375	0.774194	0.37774	0.765672	0.923395	0.664554	0.109556	0.767832	0.719268	0.371431	0.821705	0.14881	0.389952	0.317526	0.887139	0.4125	0.390852	0.877778	0.706383	0.865285
875	0.891791	0.694915	0.957198	0.881481	0.908772	0.97479	0.973799	0.901408	0.794776	0.925926	0.746114	0.738589	0.766484	0.766269	0.655336	0.647399	0.714958	0.684721	0.68469	1	0.422111	0.738571	0.729018	0.760081	0.7577	0.894737	0.6875	0.581006	0.628906	0.430556	0.767402	0.527825	0.760448	0.919892	0.664478	0.153556	1	0.719268	0.381569	0.837209	0.153274	0.409091	0.336082	0.884514	0.411458	0.419958	0.87037	0.719149	0.865285
876	0.902985	0.700565	0.964981	0.888889	0.915789	0.977591	0.982533	0.910798	0.80597	0.934156	0.756477	0.742739	0.761905	0.767186	0.649012	0.640793	0.713076	0.683104	0.688335	1	0.429146	0.742143	0.730441	0.772177	0.7577	0.894737	0.673077	0.581006	0.628906	0.364583	0.767402	0.527825	0.754975	0.914716	0.664707	0.142111	0.798247	0.719268	0.388328	0.837209	0.15625	0.37799	0.325773	0.889764	0.4125	0.417879	0.87037	0.734043	0.865285
877	0.910448	0.706215	0.972763	0.896296	0.922807	0.983193	0.9869	0.915493	0.809701	0.942387	0.761658	0.751037	0.760989	0.769936	0.652964	0.639141	0.686736	0.681487	0.68712	0.758784	0.436181	0.742857	0.731152	0.747984	0.7577	0.897661	0.677885	0.614525	0.667969	0.4375	0.767402	0.388702	0.751493	0.910734	0.671579	0.161444	0.808421	0.719268	0.401845	0.852713	0.160714	0.356459	0.37732	0.887139	0.4125	0.397089	0.87037	0.751064	0.865285
878	0.91791	0.70904	0.980545	0.9	0.926316	0.985994	0.991266	0.924883	0.817164	0.946502	0.766839	0.755187	0.760989	0.76352	0.652174	0.640793	0.681091	0.679871	0.68226	0.736486	0.422613	0.742143	0.72973	0.747312	0.753593	0.896199	0.668269	0.592179	0.632812	0.409722	0.779287	0.378583	0.748259	0.908664	0.693418	0.163667	0.807122	0.719268	0.405225	0.860465	0.162202	0.423445	0.342268	0.887139	0.4125	0.486486	0.875926	0.768085	0.865285
879	0.91791	0.711864	0.980545	0.903704	0.929825	0.985994	0.995633	0.924883	0.817164	0.946502	0.772021	0.759336	0.760989	0.765353	0.652964	0.642444	0.675447	0.679871	0.680437	0.729054	0.423618	0.74	0.728307	0.743952	0.749487	0.891813	0.677885	0.597765	0.640625	0.430556	0.782683	0.456998	0.749254	0.909142	0.691967	0.164667	0.808529	0.719268	0.408604	0.860465	0.16369	0.37799	0.356701	0.887139	0.4125	0.507277	0.87037	0.770213	0.865285
880	0.921642	0.714689	0.988327	0.907407	0.936842	0.988796	1	0.929577	0.824627	0.950617	0.772021	0.763485	0.755495	0.75802	0.647431	0.639141	0.667921	0.67502	0.694411	0.739865	0.435176	0.736429	0.747511	0.762097	0.761807	0.902047	0.692308	0.603352	0.628906	0.409722	0.772496	0.411467	0.750995	0.910018	0.65058	0.169111	0.804741	0.719268	0.401845	0.844961	0.16369	0.354067	0.360825	0.889764	0.4125	0.392931	0.877778	0.774468	0.870466
881	0.921642	0.714689	0.992218	0.911111	0.940351	0.991597	1	0.929577	0.824627	0.954733	0.772021	0.763485	0.748168	0.747021	0.641897	0.61602	0.667921	0.670978	0.693196	0.741216	0.447236	1	0.749644	0.769489	0.772074	0.903509	0.639423	0.614525	0.632812	0.451389	0.777589	0.402192	0.75597	0.91153	0.624236	0.132667	0.793592	0.719268	0.395086	0.829457	0.160714	0.354067	0.313402	0.884514	0.411458	0.376299	0.87963	0.753191	0.875648
882	0.921642	0.714689	0.992218	0.911111	0.940351	0.991597	1	0.924883	0.824627	0.954733	0.766839	0.759336	0.745421	0.750687	0.639526	0.6218	0.669802	0.666936	0.692588	0.739189	0.431156	0.753571	0.744666	0.769489	0.770021	0.902047	0.6875	0.614525	0.664062	0.555556	0.780985	0.413153	0.754478	0.910256	0.647144	0.123444	0.798463	0.719268	0.395086	0.829457	0.159226	0.327751	0.313402	0.889764	0.4125	0.351351	0.877778	0.744681	0.875648
883	0.921642	0.714689	0.992218	0.907407	0.940351	0.991597	1	0.924883	0.824627	0.954733	0.772021	0.759336	0.740842	0.752521	0.638735	0.589595	0.713076	0.668553	0.699878	0.744595	0.430653	0.759286	0.752489	0.774194	0.759754	0.900585	0.716346	0.569832	0.632812	0.465278	0.764007	0.375211	0.757463	0.912486	0.678299	0.123889	0.797164	0.719268	0.395086	0.813953	0.157738	0.303828	0.319588	0.897638	0.411458	0.407484	0.877778	0.742553	0.878238
884	0.921642	0.711864	0.988327	0.903704	0.940351	0.988796	0.995633	0.915493	0.828358	0.950617	0.766839	0.755187	0.740842	0.734189	0.635573	0.640793	0.726246	0.666936	0.696841	0.748649	0.448241	0.739286	0.746088	0.760753	0.753593	0.899123	0.721154	0.575419	0.640625	0.496528	0.764007	0.36425	0.762189	0.921405	0.653635	0.119333	0.791861	0.719268	0.388328	0.79845	0.154762	0.325359	0.241237	0.884514	0.4125	0.370062	0.881481	0.734043	0.875648
885	0.91791	0.70904	0.984436	0.9	0.940351	0.988796	0.995633	0.910798	0.828358	0.954733	0.761658	0.751037	0.742674	0.734189	0.634783	0.646573	0.730009	0.667745	0.68712	0.742568	0.448241	0.740714	0.743243	0.759409	0.749487	0.896199	0.725962	0.564246	0.628906	0.510417	0.780985	0.400506	0.763184	0.918219	0.661729	0.116222	0.791752	0.719268	0.384948	0.782946	0.151786	0.308612	0.22268	0.887139	0.411458	0.39501	0.875926	0.734043	0.865285
886	0.91791	0.706215	0.984436	0.9	0.936842	0.988796	0.991266	0.910798	0.828358	0.946502	0.761658	0.751037	0.744505	0.741522	0.637945	0.644096	0.716839	0.669361	0.695626	0.743243	0.453769	0.755	0.75889	0.75672	0.7577	0.894737	0.653846	0.592179	0.667969	0.46875	0.7691	0.397133	0.75995	0.917821	0.618509	0.116	0.797489	0.719268	0.388328	0.79845	0.153274	0.294258	0.210309	0.879265	0.4125	0.338877	0.877778	0.734043	0.873057
887	0.91791	0.70339	0.984436	0.9	0.940351	0.988796	0.991266	0.910798	0.828358	0.946502	0.761658	0.751037	0.742674	0.741522	0.636364	0.639141	0.709313	0.668553	0.697448	0.743919	0.467337	0.749286	0.748222	0.761425	0.761807	0.897661	0.629808	0.586592	0.628906	0.402778	0.775891	0.39882	0.760697	0.918299	0.613012	0.113222	0.798355	0.719268	0.391707	0.790698	0.153274	0.291866	0.249485	0.88189	0.4125	0.309771	0.885185	0.734043	0.870466
888	1	1	0.85214	0.696296	0.705263	0.616246	0.646288	0.807512	0.406716	0.925926	0.740933	0.692946	0.751832	0.756187	1	1	0.818438	1	0.704131	0.781757	0.624121	0.216429	0.21835	0	0.268994	0.0239766	0.980769	0.257067	0.734375	0.163194	0.186757	0.00112985	0.00427861	0.003663	0.000221442	0.00333333	0.798896	0.0473066	0	0.775194	0.50744	0.291866	0.606186	0.0892388	0.447917	0.565489	0.87037	0.893617	0.00595855
889	0.86194	0.677966	0.949416	0.874074	0.905263	0.971989	0.956332	0.86385	0.772388	0.917695	0.751295	0.726141	0.739927	0.754354	0.631621	0.618497	0.745061	0.672595	0.706561	0.75473	0.449749	0.742857	0.756046	0.754032	0.776181	0.916667	0.620192	0.614525	0.628906	0.465278	0.363328	0.421585	0.774627	0.928651	0.600565	0.000444444	0.736119	0.719268	0.378189	0.837209	0.142857	0.325359	0.243299	0.918635	0.416667	0.299376	0.87037	0.638298	0.88601
890	0.86194	0.677966	0.949416	0.874074	0.905263	0.969188	0.956332	0.86385	0.768657	0.917695	0.751295	0.726141	0.739927	0.754354	0.631621	0.617671	0.745061	0.671787	0.708991	0.762838	0.448744	0.743571	0.753912	0.75672	0.778234	0.916667	0.591346	0.625698	0.652344	0.472222	0.887946	0.409781	0.774627	0.884217	0.609041	0.000444444	0.725295	0.719268	0.384948	0.837209	0.139881	0.320574	0.239175	0.910761	0.416667	0.301455	0.87037	0.638298	0.88601
891	0.858209	0.675141	0.945525	0.87037	0.905263	0.966387	0.951965	0.859155	0.764925	0.91358	0.746114	0.721992	0.747253	0.762603	0.693281	0.625929	0.751646	0.679062	0.705346	0.77027	0.449246	0.753571	0.754623	0.772849	0.778234	0.915205	0.610577	0.639665	0.660156	0.430556	0.847199	0.473019	0.777114	0.903329	0.613317	0.000333333	0.726486	0.719268	0.388328	0.837209	0.142857	0.34689	0.237113	0.908136	0.416667	0.318087	0.87037	0.638298	0.891192
892	0.858209	0.669492	0.941634	0.866667	0.905263	0.966387	0.947598	0.859155	0.757463	0.909465	0.746114	0.721992	0.750916	0.765353	0.642688	0.625929	0.75635	0.681487	0.703524	0.772297	0.449749	0.755714	0.757468	0.773522	0.770021	0.913743	0.629808	0.648045	0.734375	0.354167	0.835314	0.388702	0.777114	0.937809	0.612935	0.000222222	0.715662	0.719268	0.391707	0.837209	0.139881	0.368421	0.22268	0.902887	0.416667	0.340956	0.87037	0.617021	0.896373
893	0.858209	0.669492	0.937743	0.866667	0.901754	0.963585	0.947598	0.859155	0.753731	0.909465	0.746114	0.717842	0.755495	0.769019	0.641897	0.627581	0.761994	0.686338	0.700486	0.77027	0.441206	0.756429	0.757468	0.773522	0.749487	0.906433	0.639423	0.597765	0.632812	0.402778	0.83871	0.385329	0.779602	0.936375	0.63821	0.000222222	0.713497	0.719268	0.388328	0.837209	0.133929	0.368421	0.226804	0.92126	0.416667	0.392931	0.87037	0.617021	0.880829
894	0.854478	0.669492	0.937743	0.862963	0.901754	0.960784	0.943231	0.859155	0.753731	0.909465	0.746114	0.717842	0.760989	0.771769	0.645059	0.634187	0.763876	0.689572	0.708384	0.772973	0.448744	0.764286	0.762447	0.778226	0.747433	0.904971	0.644231	0.600559	0.652344	0.385417	0.830221	0.388702	0.777114	0.925466	0.643708	0.000222222	0.712631	0.719268	0.388328	0.837209	0.139881	0.385167	0.220619	0.931759	0.416667	0.407484	0.87037	0.617021	0.878238
895	0.854478	0.669492	0.937743	0.862963	0.901754	0.960784	0.943231	0.859155	0.753731	0.909465	0.746114	0.717842	0.761905	0.776352	0.687747	0.632535	0.76952	0.691188	0.705346	0.776351	0.454271	0.757857	0.753912	0.78293	0.749487	0.902047	0.634615	0.603352	0.65625	0.368056	0.813243	0.392074	0.779353	0.935579	0.623396	0.000222222	0.71393	0.719268	0.384948	0.829457	0.139881	0.373206	0.214433	0.923885	0.416667	0.424116	0.87037	0.617021	0.875648
896	0.865672	0.672316	0.937743	0.87037	0.905263	0.966387	0.951965	0.868545	0.757463	0.91358	0.756477	0.726141	0.769231	0.791017	0.667984	0.629232	0.760113	0.697656	0.704739	0.773649	0.458291	0.752857	0.641536	0.68078	0.74538	0.891813	0.528846	0.603352	0.640625	0.333333	0.811545	0.392074	0.774129	0.932473	0.613622	0.003	0.694556	0.719268	0.384948	0.891473	0.141369	0.471292	0.202062	0.87664	0.416667	0.571726	0.87037	0.617021	0.870466
897	0.880597	0.675141	0.961089	1	0.908772	0.988796	0.960699	0.873239	0.779851	0.909465	0.761658	0.73029	0.684066	0.660862	0.603162	0.566474	0.649106	0.631366	0.624544	0.766892	0.40201	0.688571	0.588193	0.61828	0.552361	0.814327	0.543269	0.402235	0.480469	0.4375	0	0	0.78607	0.875936	0.18708	0.0942222	0	0.719268	0.354533	0.829457	0.136905	0.00956938	0.612371	0.866142	0	0.049896	0	0	0.772021
898	0.895522	0.677966	0.968872	0.925926	0.919298	0.97479	0.973799	0.887324	0.772388	0.925926	0.772021	0.742739	0.75	0.765353	0.649012	0.624277	0.707432	0.684721	0.698056	0.687162	0.417588	0.675714	0.732575	0.775538	0.724846	0.871345	0.639423	0.497207	0.5	0.416667	0.777589	0.602867	0.769403	0.925784	0.660583	0.105	0.76307	0.719268	0.300463	0.736434	0.130952	0.58134	0.375258	0.784777	0.364583	0.409563	0.87037	0.680851	0.782383
899	0.88806	0.677966	0.968872	0.9	0.915789	0.971989	0.969432	0.877934	0.761194	0.925926	0.766839	0.738589	0.758242	0.774519	0.656126	0.624277	0.724365	0.691188	0.688335	0.722973	0.467839	0.747857	0.737553	0.776882	0.73306	0.883041	0.605769	0.569832	0.613281	0.354167	0.780985	0.55312	0.763433	0.933509	0.62248	0.114556	0.764693	0.719268	0.347775	0.790698	0.133929	0.504785	0.354639	0.832021	0.385417	0.307692	0.87037	0.680851	0.813472
900	0.88806	0.677966	0.964981	0.892593	0.912281	0.971989	0.965066	0.882629	0.761194	0.921811	0.766839	0.738589	0.75	0.76352	0.645059	0.61602	0.716839	0.683104	0.684083	0.743919	0.446734	0.717143	0.730441	0.747312	0.7577	0.891813	0.572115	0.592179	0.617188	0.420139	0.792869	0.458685	0.76791	0.927616	0.636378	0.129778	0.77043	0.719268	0.351154	0.852713	0.138393	0.41866	0.385567	0.850394	0.395833	0.316008	0.87037	0.680851	0.854922
901	0.88806	0.677966	0.964981	0.896296	0.915789	0.97479	0.969432	0.887324	0.761194	0.921811	0.766839	0.738589	0.74359	0.75802	0.643478	0.614368	0.707432	0.676637	0.685905	0.745946	0.458794	0.715714	0.733997	0.752016	0.761807	0.894737	0.591346	0.603352	0.664062	0.440972	0.797963	0.458685	0.764925	0.926342	0.634392	0.132222	0.770538	0.719268	0.351154	0.860465	0.138393	0.435407	0.375258	0.845144	0.395833	0.382536	0.87037	0.680851	0.860104
902	0.891791	0.683616	0.968872	0.903704	0.922807	0.977591	0.969432	0.892019	0.768657	0.921811	0.777202	0.742739	0.736264	0.750687	0.638735	0.611065	0.696143	0.673403	0.68955	0.766216	0.468844	0.722143	0.73542	0.762769	0.761807	0.894737	0.581731	0.620112	0.671875	0.371528	0.777589	0.446037	0.75796	0.923157	0.6166	0.141556	0.773893	0.719268	0.371431	0.906977	0.144345	0.423445	0.323711	0.839895	0.395833	0.357588	0.87037	0.680851	0.870466
903	0.891791	0.686441	0.968872	0.907407	0.926316	0.980392	0.973799	0.896714	0.768657	0.930041	0.777202	0.746888	0.74359	0.752521	0.639526	0.611065	0.707432	0.676637	0.690765	0.750676	0	0.724286	0.737553	0.770833	0.761807	0.896199	0.5625	0.614525	0.683594	0.430556	0.774194	0.404722	0.759701	0.924192	0.637065	0.144111	0.778006	0.719268	0.371431	0.930233	0.145833	0.382775	0.323711	0.855643	0.395833	0.419958	0.87037	0.702128	0.875648
904	0.899254	0.689266	0.972763	0.907407	0.929825	0.983193	0.978166	0.896714	0.772388	0.934156	0.777202	0.751037	0.738095	0.750687	0.640316	0.611065	0.688617	0.673403	0.691373	0.725	0.447739	0.725714	0.740398	0.772177	0.765914	0.897661	0.605769	0.592179	0.644531	0.472222	0.775891	0.424115	0.758458	0.920529	0.627214	0.185333	0.778006	0.719268	0.371431	0.906977	0.145833	0.425837	0.360825	0.860892	0.395833	0.434511	0.87037	0.702128	0.880829
905	0.899254	0.69209	0.976654	0.907407	0.933333	0.983193	0.978166	0.901408	0.776119	0.934156	0.777202	0.751037	0.740842	0.752521	0.638735	0.609414	0.681091	0.67502	0.693196	0.722973	0.455779	0.727143	0.760313	0.773522	0.774127	0.897661	0.600962	0.631285	0.671875	0.416667	0.770798	0.435919	0.75995	0.920131	0.629429	0.136111	0.776166	0.719268	0.378189	0.906977	0.145833	0.416268	0.336082	0.871391	0.395833	0.384615	0.87037	0.702128	0.880829
906	0.902985	0.694915	0.976654	0.911111	0.933333	0.985994	0.982533	0.901408	0.779851	0.938272	0.782383	0.751037	0.738095	0.748854	0.634783	0.624277	0.675447	0.671787	0.696841	0.731757	0.452261	0.729286	0.754623	0.765457	0.770021	0.897661	0.668269	0.614525	0.644531	0.503472	0.760611	0.423272	0.761692	0.916149	0.628894	0.108	0.779089	0.719268	0.37481	0.899225	0.145833	0.349282	0.31134	0.860892	0.395833	0.380457	0.87037	0.702128	0.88601
907	0.902985	0.694915	0.976654	0.907407	0.936842	0.983193	0.982533	0.901408	0.779851	0.938272	0.782383	0.755187	0.735348	0.754354	0.637154	0.629232	0.713076	0.671787	0.696841	0.735135	0.445729	0.726429	0.751778	0.760753	0.767967	0.900585	0.701923	0.592179	0.652344	0.413194	0.765705	0.425801	0.767164	0.92252	0.641112	0.091	0.78266	0.719268	0.368051	0.883721	0.142857	0.42823	0.323711	0.874016	0.395833	0.307692	0.87037	0.702128	0.88342
908	0.902985	0.694915	0.976654	0.903704	0.933333	0.983193	0.982533	0.901408	0.783582	0.938272	0.777202	0.751037	0.744505	0.745188	0.640316	0.644096	0.731891	0.675829	0.701094	0.748649	0.457286	0.727143	0.752489	0.768145	0.76386	0.900585	0.711538	0.586592	0.652344	0.381944	0.764007	0.440978	0.768657	0.920688	0.63172	0.0837778	0.781686	0.719268	0.364672	0.860465	0.141369	0.38756	0.321649	0.879265	0.395833	0.403326	0.87037	0.702128	0.878238
909	0.902985	0.694915	0.972763	0.9	0.929825	0.983193	0.978166	0.901408	0.783582	0.934156	0.772021	0.751037	0.74359	0.756187	0.649012	0.632535	0.713076	0.679871	0.704739	0.756081	0.450754	0.73	0.757468	0.770833	0.770021	0.904971	0.644231	0.636872	0.707031	0.444444	0.764007	0.428331	0.767413	0.920847	0.641265	0.0682222	0.768481	0.719268	0.368051	0.868217	0.141369	0.37799	0.354639	0.855643	0.395833	0.326403	0.87037	0.659574	0.875648
910	0.899254	0.694915	0.976654	0.896296	0.926316	0.980392	0.978166	0.901408	0.783582	0.934156	0.772021	0.751037	0.753663	0.76352	0.649012	0.625103	0.727187	0.681487	0.693196	0.753378	0.448744	0.732143	0.756046	0.751344	0.770021	0.900585	0.615385	0.620112	0.660156	0.409722	0.764007	0.422428	0.769652	0.919732	0.585446	0.086	0.755493	0.719268	0.364672	0.860465	0.139881	0.380383	0.336082	0.905512	0.40625	0.247401	0.87037	0.659574	0.880829
911	0.899254	0.694915	0.972763	0.9	0.929825	0.977591	0.978166	0.896714	0.783582	0.934156	0.766839	0.746888	0.752747	0.761687	0.649802	0.622626	0.730009	0.681487	0.688335	0.750676	0.447236	0.732857	0.751778	0.754032	0.765914	0.906433	0.586538	0.614525	0.683594	0.447917	0.762309	0.406408	0.766667	0.918857	0.584835	0.0995556	0.759931	0.719268	0.351154	0.860465	0.139881	0.373206	0.334021	0.895013	0.40625	0.266112	0.87037	0.659574	0.88601
912	0.895522	0.717514	0.980545	0.892593	0.908772	0.988796	0.965066	0.882629	0.858209	0.909465	0.746114	0.738589	0.740842	0.750687	0.636364	0.619323	0.690499	0.67502	0.694411	0.737838	0.587437	0.759286	0.745377	0.752688	0.798768	0.918129	0.673077	0.614525	0.617188	0.604167	0.820034	0.473862	0.767164	0.923873	0.590944	0.0488889	0.733088	0.719268	0.381569	0.860465	0.151786	0.528708	0.214433	0.923885	0.416667	0.328482	0.87037	0.638298	0.911917
913	0.895522	0.717514	0.980545	0.892593	0.908772	0.988796	0.960699	0.882629	0.858209	0.909465	0.746114	0.738589	0.742674	0.751604	0.639526	0.624277	0.688617	0.67502	0.706561	0.749324	0.560804	0.765	0.756757	0.760081	0.798768	0.918129	0.706731	0.625698	0.65625	0.479167	0.808149	0.500843	0.769652	0.926262	0.458232	0.0498889	0.741314	0.719268	0.384948	0.860465	0.153274	0.507177	0.385567	0.910761	0.416667	0.388773	0.87037	0.638298	0.911917
914	0.891791	0.717514	0.980545	0.892593	0.908772	0.985994	0.960699	0.882629	0.854478	0.90535	0.740933	0.738589	0.728022	0.734189	0.624506	0.614368	0.694262	0.662086	0.710207	0.768919	0.508543	0.769286	0.766003	0.750672	0.798768	0.912281	0.706731	0.606145	0.667969	0.350694	0.820034	0.39882	0.767164	0.926979	0.296503	0.0213333	0.748349	0.719268	0.391707	0.930233	0.153274	0.492823	0.272165	0.908136	0.416667	0.39501	0.87037	0.638298	0.917098
915	0.891791	0.717514	0.980545	0.885185	0.905263	0.985994	0.960699	0.877934	0.854478	0.90535	0.740933	0.73444	0.71978	0.734189	0.623715	0.627581	0.714958	0.658852	0.696233	0.766892	0.515075	0.752143	0.750356	0.763441	0.770021	0.906433	0.697115	0.614525	0.695312	0.347222	0.779287	0.499157	0.769652	0.925864	0.218693	0.0548889	0.752246	0.719268	0.388328	0.891473	0.153274	0.456938	0.228866	0.902887	0.416667	0.14553	0.87037	0.659574	0.906736
916	0.88806	0.711864	0.976654	0.881481	0.901754	0.983193	0.956332	0.873239	0.850746	0.901235	0.735751	0.73029	0.725275	0.735105	0.632411	0.634187	0.720602	0.65966	0.669502	0.752703	0.565829	0.731429	0.748933	0.765457	0.770021	0.912281	0.706731	0.589385	0.632812	0.34375	0.796265	0.492411	0.774129	0.926421	0.620953	0.0524444	0.747916	0.719268	0.368051	0.875969	0.153274	0.409091	0.239175	0.895013	0.40625	0.355509	0.87037	0.659574	0.870466
917	0.88806	0.70339	0.972763	0.881481	0.894737	0.980392	0.956332	0.868545	0.847015	0.901235	0.73057	0.726141	0.728022	0.739688	0.633202	0.635838	0.726246	0.660469	0.712637	0.739189	0.495477	0.729286	0.747511	0.770161	0.749487	0.902047	0.740385	0.569832	0.617188	0.322917	0.806452	0.473862	0.775622	0.930721	0.611561	0.046	0.740232	0.719268	0.354533	0.806202	0.142857	0.315789	0.336082	0.88189	0.40625	0.31185	0.87037	0.638298	0.865285
918	0.88806	0.70904	0.968872	0.881481	0.891228	0.980392	0.956332	0.868545	0.847015	0.901235	0.73057	0.726141	0.725275	0.739688	0.633202	0.632535	0.724365	0.658852	0.708991	0.734459	0.485427	0.731429	0.743243	0.766129	0.753593	0.909357	0.730769	0.564246	0.589844	0.357639	0.813243	0.466273	0.775124	0.932633	0.579795	0.000222222	0.739041	0.719268	0.354533	0.806202	0.142857	0.334928	0.309278	0.887139	0.40625	0.222453	0.87037	0.638298	0.870466
919	0.880597	0.70339	0.964981	0.877778	0.891228	0.980392	0.956332	0.86385	0.843284	0.893004	0.73057	0.721992	0.716117	0.728689	0.618972	0.627581	0.709313	0.645918	0.682868	0.754054	0.456784	0.755	0.737553	0.758737	0.761807	0.907895	0.730769	0.592179	0.640625	0.423611	0.818336	0.445194	0.776119	0.929846	0.578803	0.000222222	0.738608	0.719268	0.371431	0.821705	0.145833	0.320574	0.346392	0.863517	0.40625	0.316008	0.87037	0.638298	0.880829
920	0.876866	0.69774	0.957198	0.874074	0.887719	0.977591	0.947598	0.859155	0.835821	0.893004	0.725389	0.717842	0.710623	0.721357	0.622925	0.614368	0.701787	0.649151	0.694411	0.738514	0.437186	0.755714	0.754623	0.766801	0.770021	0.929825	0.677885	0.597765	0.652344	0.416667	0.831919	0.471332	0.769403	0.933907	0.605376	0.0785556	0.745211	0.719268	0.395086	0.868217	0.150298	0.389952	0.303093	0.892388	0.40625	0.305613	0.87037	0.638298	0.88601
921	0.876866	0.694915	0.957198	0.87037	0.887719	0.977591	0.947598	0.859155	0.835821	0.893004	0.73057	0.717842	0.717033	0.726856	0.618182	0.611065	0.694262	0.654002	0.696841	0.736486	0.445729	0.759286	0.756757	0.762097	0.774127	0.923977	0.634615	0.614525	0.707031	0.381944	0.833616	0.484823	0.761692	0.930005	0.626222	0.113556	0.770971	0.719268	0.411983	0.891473	0.154762	0.38756	0.268041	0.887139	0.40625	0.276507	0.87037	0.680851	0.891192
922	0.880597	0.69774	0.980545	0.877778	0.891228	0.983193	0.951965	0.868545	0.835821	0.893004	0.735751	0.726141	0.717949	0.730522	0.626087	0.601156	0.667921	0.656427	0.695018	0.728378	0.441709	0.76	0.755334	0.757392	0.776181	0.909357	0.605769	0.648045	0.710938	0.447917	0.830221	0.489039	0.753731	0.924829	0.632025	0.134667	0.775625	0.719268	0.425501	0.937984	0.159226	0.325359	0.325773	0.900262	0.416667	0.297297	0.888889	0.702128	0.896373
923	0.884328	0.69774	0.961089	0.885185	0.894737	0.985994	0.956332	0.873239	0.839552	0.897119	0.746114	0.73029	0.71978	0.728689	0.628458	0.597853	0.66604	0.657235	0.693196	0.735135	0.444221	0.760714	0.761735	0.748656	0.778234	0.909357	0.591346	0.653631	0.738281	0.399306	0.809847	0.486509	0.751244	0.925545	0.631567	0.147333	0.783093	0.719268	0.425501	0.953488	0.162202	0.301435	0.298969	0.884514	0.416667	0.324324	0.87037	0.702128	0.898964
[truncated: 372 more rows]
[truncated: 3 more columns]
